# Supplementary material for: Cu(OTf)2 catalyzed Ugi-type reaction of N,O-acetals with isocyanides for the synthesis of pyrrolidinyl and piperidinyl 2-carboxamides
Source: Royal Society of Chemistry journal article supplement (doi:10.1039/d1cc03113a), 2021-01-01
Supplement: d1cc03113a1.pdf [file d1cc03113a1.pdf]

## *Supplementary Information*

### Cu(OTf)<sub>2</sub> Catalyzed Ugi-type Reaction of *N,O*-Acetals with Isocyanides for Synthesis of Pyrrolidinyl and Piperidinyl 2-Carboxamides

Zhuo-Ya Mao,<sup>a</sup> Xiao-Di Nie,<sup>a</sup> Yi-Man Feng,<sup>a</sup> Chang-Mei Si,<sup>a</sup> Bang-Guo Wei\*<sup>a</sup> and Guo-Qiang Lin<sup>b</sup>

<sup>a</sup>*School of Pharmacy and Institutes of Biomedical Sciences, Fudan University, 826 Zhangheng Road, Shanghai, 201203, China.*

<sup>b</sup>*Shanghai Institute of Organic Chemistry, Chinese Academy of Sciences, 345 Lingling Road, Shanghai 200032, China.*

### **Table of Contents**

|                                                            |      |
|------------------------------------------------------------|------|
| Mechanism study.....                                       | S1   |
| Experimental section.....                                  | S3   |
| NMR Spectra.....                                           | S28  |
| ORTEP drawing of the X-ray crystallographic structure..... | S108 |

## Mechanism Study:

The “inside attack” model and electronic effects have been proposed to explain the stereoselective reactions of nucleophiles with five-membered-ring oxocarbenium ions (Figure S1a). The “inside attack” model was used to explain the direction of the nuclear attack. The preferred conformation of a five-membered-ring oxocarbenium ion is an envelope conformation where the C=O<sup>+</sup> unit resides in the flattened portion of the envelope. Approach of the nucleophile onto the cation can occur from either side. Attack from “inside” the cation forms the all-staggered conformer. Attack from “outside” results in a conformer that suffers from eclipsed interactions. Because the staggered product is lower in energy than the eclipsed product, attack from “inside” the envelope should be favored. The electronic effect was used to explain the stability of the two conformations. When the C-4 alkoxy group in a pseudoaxial orientation, the electrostatic effect can be maximized to stabilize the conformation, placing the partially negatively charged substituent in closest proximity to the cationic carbon of the oxocarbenium ion. On the contrary, due to the lack of electrostatic effect, the conformation with C-4 aryl group in the equatorial orientation is more stable.

In order to verify the applicability of these model in five-membered-ring iminium ion, 4-Ar-*N,O*-acetal was carry out under standard conditions and 2,4-*trans* product was obtained in 84% yield with 92:8 diastereoselectivity as expected. This result in good agreement with the theoretical model. Therefore, the theoretical model for oxocarbenium ions is also applicable to iminium ion (Figure S1b).

Stereoselective for Cu(OTf)<sub>2</sub> catalyzed Ugi-type reaction of *N,O*-acetals with isocyanides can be explained by the “inside attack” model and electronic effect (Figure S1c). When the C-4 alkoxy group in a pseudoaxial orientation, the electrostatic effect can be maximized to stabilize the conformation. Although there is a syn-butanol interaction when attacking from the “inside”, but this interaction is considerably smaller than a syn-pentane interaction, so it is not destabilizing enough to hinder attack from this trajectory to generated the 2,4-*cis* product. When the C-4 alkoxy group is replaced by C-4 aryl group, the electrostatic effect disappears, so the C-4 aryl group will be more

stable in the equatorial orientation. Meanwhile, a C-4 aryl group would experience a syn-pentane interaction upon attack of the C-4 axial conformer, so attack occurs on the analogous equatorial cation, leading to the 2,4-*trans* product.

(a) Stereoselective model for reaction of five-membered-ring oxocarbenium ions with nucleophiles

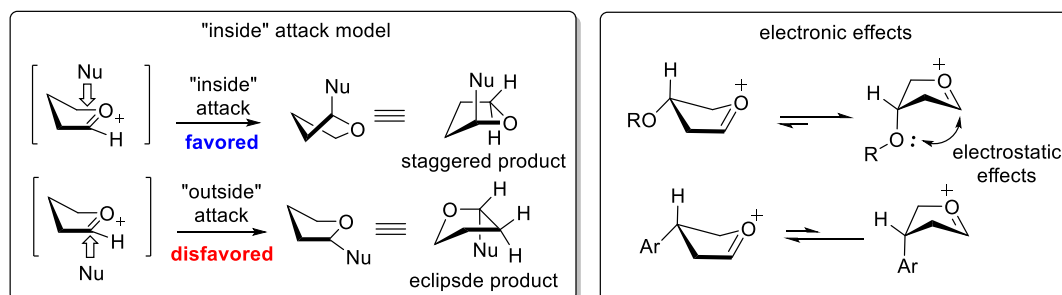

(b) Experimental results

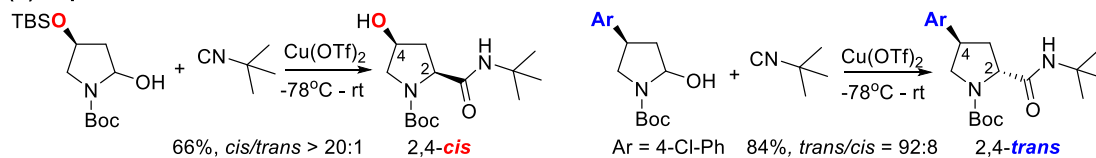

(c) Stereoselective model for Cu(OTf)<sub>2</sub> catalyzed Ugi-type reaction of *N,O*-acetals with isocyanides

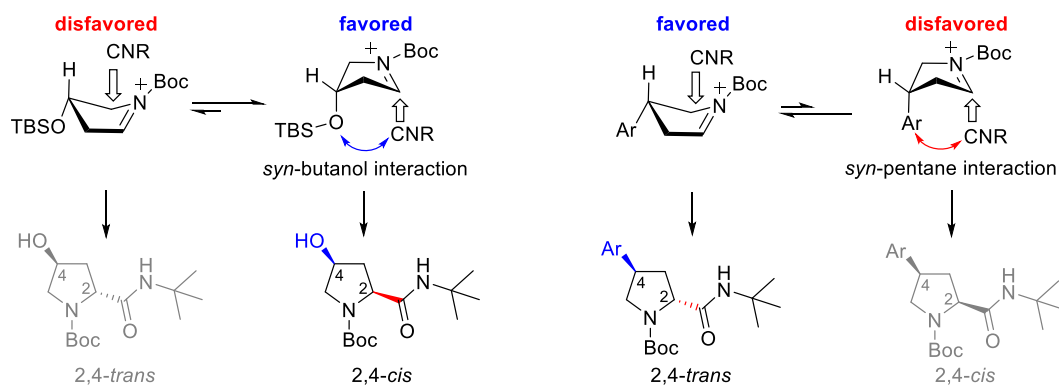

**Figure S1.** (a) Stereoselective model for reaction of five-membered-ring oxocarbenium ions with nucleophiles; (b) Experimental results; (c) Stereoselective model for Cu(OTf)<sub>2</sub> catalyzed Ugi-type reaction of *N,O*-acetals with isocyanides

**General:** Reactions were monitored by thin layer chromatography (TLC) on glass plates coated with silica gel with fluorescent indicator. Flash chromatography was performed on silica gel (300–400) with petroleum/EtOAc as eluent. Optical rotations were measured on a polarimeter with a sodium lamp. HRMS were measured on a LTQ-Orbitrap-XL apparatus. IR spectra were recorded using film on a Fourier Transform Infrared Spectrometer. NMR spectra were recorded at 400 MHz, and chemical shifts are reported in  $\delta$  (ppm) referenced to an internal CD<sub>3</sub>OD (3.31) standard for <sup>1</sup>H NMR and CD<sub>3</sub>OD (49.00) for <sup>13</sup>C NMR.

#### **General Procedure A: Synthesis of 4**

To a solution of imide (2 mmol) in MeOH (5 mL) was added NaBH<sub>4</sub> (3.0 equiv, 227 mg) at 0 °C in one portion. The reaction mixture was stirred for 1 h at the same temperature, and the reaction was quenched with saturated aqueous NaHCO<sub>3</sub> (5 mL) and warmed to room temperature. The mixture was extracted with DCM (20 mL × 3), and the combined organic layers were washed with brine. Dried, filtered, and concentrated to give the *N,O*-acetal **4** without further purifications.

#### **General Procedure B: Synthesis of 6**

*N,O*-acetal **4** (1.0 mmol), isocyanides **3** (1.0 mmol) were dissolved in THF (5 mL) at room temperature, then Cu(OTf)<sub>2</sub> (0.2 mmol) was added. The reaction was stirred at room temperature overnight then quenched with a saturated NaHCO<sub>3</sub> aqueous solution and extracted with EtOAc (30 mL × 3). The combined organic layers were washed with brine, dried, filtered and concentrated. The residue was purified by flash chromatography on silica gel (PE/EA = 2:1 - 1:1) to give the desired product **6**.

#### ***tert*-Butyl 2-(cyclohexylcarbamoyl)pyrrolidine-1-carboxylate (6a)**



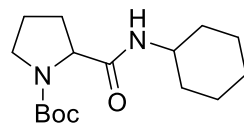

Eluent: PE/EA = 2:1, White Solid (247 mg, 84%); mp 149-150 °C; IR (film):  $\nu_{\max}$  2934, 2419, 1699, 1640, 1451, 1401, 1363, 1161, 1116.  $^1\text{H}$  NMR (400 MHz,  $\text{CD}_3\text{OD}$ , mixture of rotamers)  $\delta$  4.17-4.06 (m, 1H), 3.68-3.59 (m, 1H), 3.54-3.47 (m, 1H), 3.44-3.36 (m, 1H), 2.26-2.10 (m, 1H), 1.95-1.73 (m, 7H), 1.67-1.60 (m, 1H), 1.46 (s, 2.5H), 1.42 (s, 6.5H), 1.38-1.17 (m, 5H) ppm;  $^{13}\text{C}$  NMR (100 MHz,  $\text{CD}_3\text{OD}$ , mixture of rotamers)  $\delta$  174.7, 174.3, 156.4, 156.1, 81.3, 81.2, 61.7, 61.5, 49.8, 48.0, 33.9, 33.8, 32.8, 31.6, 28.7, 26.6, 26.2, 25.4, 24.7 ppm; HRMS (ESI-Orbitrap)  $m/z$ :  $[\text{M} + \text{Na}]^+$  Calcd for  $\text{C}_{16}\text{H}_{28}\text{N}_2\text{O}_3\text{Na}^+$ : 319.1992, found: 319.1993.

#### Isopropyl 2-(cyclohexylcarbamoyl)pyrrolidine-1-carboxylate (6b)

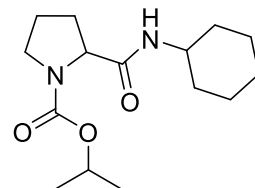

Eluent: PE/EA = 2:1, White Solid (260 mg, 92%); mp 120-121 °C; IR (film):  $\nu_{\max}$  2932, 2480, 2426, 1705, 1650, 1449, 1411, 1385, 1115,  $^1\text{H}$  NMR (400 MHz,  $\text{CD}_3\text{OD}$ , mixture of rotamers)  $\delta$  4.87-4.83 (m, 1H), 4.20-4.14 (m, 1H), 3.68-3.59 (m, 1H), 3.57-3.50 (m, 1H), 3.48-3.41 (m, 1H), 2.28-2.13 (m, 1H), 1.96-1.73 (m, 7H), 1.67-1.60 (m, 1H), 1.41-1.31 (m, 2H), 1.29-1.17 (m, 9H) ppm;  $^{13}\text{C}$  NMR (100 MHz,  $\text{CD}_3\text{OD}$ , mixture of rotamers)  $\delta$  174.5, 174.1, 156.8, 156.4, 70.2, 61.8, 61.5, 49.8, 48.3, 48.0, 33.9, 33.7, 32.7, 31.7, 26.7, 26.2, 25.4, 24.7, 22.6, 22.5 ppm;

HRMS (ESI-Orbitrap)  $m/z$ :  $[M + Na]^+$  Calcd for  $C_{15}H_{26}N_2O_3Na^+$ : 305.1836, found: 305.1834.

**Propyl 2-(cyclohexylcarbamoyl)pyrrolidine-1-carboxylate (6c)**

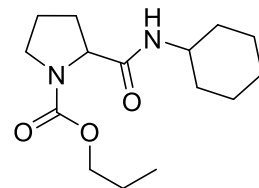

Eluent: PE/EA = 2:1, White Solid (246 mg, 87%); mp 110-111 °C; IR (film):  $\nu_{max}$  2933, 2421, 1703, 1645, 1446, 1425, 1365, 1120.  $^1H$  NMR (400 MHz,  $CD_3OD$ , mixture of rotamers)  $\delta$  4.21-4.16 (m, 1H), 4.06-3.92 (m, 2H), 3.67-3.59 (m, 1H), 3.58-3.51 (m, 1H), 3.50-3.43 (m, 1H), 2.27-2.13 (m, 1H), 2.00-1.73 (m, 7H), 1.69-1.56 (m, 3H), 1.37-1.16 (m, 5H), 0.99-0.90 (m, 3H) ppm;  $^{13}C$  NMR (100 MHz,  $CD_3OD$ , mixture of rotamers)  $\delta$  174.4, 174.1, 157.2, 156.9, 68.2, 61.8, 61.5, 49.7, 48.1, 33.8, 33.7, 32.8, 31.7, 26.7, 26.2, 25.4, 24.6, 23.5, 10.9, 10.7 ppm; HRMS (ESI-Orbitrap)  $m/z$ :  $[M + Na]^+$  Calcd for  $C_{15}H_{26}N_2O_3Na^+$ : 305.1836, found: 305.1835.

**Isobutyl 2-(cyclohexylcarbamoyl)pyrrolidine-1-carboxylate (6d)**

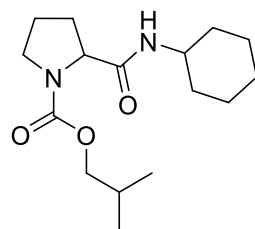

Eluent: PE/EA = 2:1, White Solid (255 mg, 86%); mp 123-125 °C; IR (film):  $\nu_{\max}$  2932, 2855, 1708, 1646, 1449, 1420, 1385, 1359, 1121.  $^1\text{H}$  NMR (400 MHz,  $\text{CD}_3\text{OD}$ , mixture of rotamers)  $\delta$  4.22-4.16 (m, 1H), 3.89-3.75 (m, 2H), 3.66-3.58 (m, 1H), 3.57-3.51 (m, 1H), 3.50-3.44 (m, 1H), 2.29-2.14 (m, 1H), 1.97-1.72 (m, 8H), 1.68-1.60 (m, 1H), 1.38-1.14 (m, 5H), 0.98-0.89 (m, 6H) ppm;  $^{13}\text{C}$  NMR (100 MHz,  $\text{CD}_3\text{OD}$ , mixture of rotamers)  $\delta$  174.3, 174.0, 157.1, 156.8, 72.7, 61.8, 61.4, 49.8, 48.4, 33.7, 32.9, 31.6, 29.3, 26.6, 26.1, 25.3, 24.6, 19.4 ppm; HRMS (ESI-Orbitrap)  $m/z$ :  $[\text{M} + \text{Na}]^+$  Calcd for  $\text{C}_{16}\text{H}_{28}\text{N}_2\text{O}_3\text{Na}^+$ : 319.1992, found: 319.1998.

### Benzyl 2-(cyclohexylcarbamoyl)piperidine-1-carboxylate (6e)

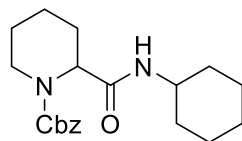

Eluent: PE/EA = 2:1, White Solid (214 mg, 62%); mp 76-77 °C; IR (film):  $\nu_{\max}$  2930, 2854, 2360, 1699, 1645, 1416, 1254, 1169.  $^1\text{H}$  NMR (400 MHz,  $\text{CD}_3\text{OD}$ )  $\delta$  7.40-7.25 (m, 5H), 5.19-5.14 (m, 1H), 5.13-5.02 (m, 1H), 4.71-4.65 (m, 1H), 4.05-3.98 (m, 1H), 3.70-3.57 (m, 1H), 3.25-3.15 (m, 1H), 2.19-2.01 (m, 1H), 1.83-1.58 (m, 8H), 1.45-1.28 (m, 4H), 1.26-1.10 (m, 3H) ppm;  $^{13}\text{C}$  NMR (100 MHz,  $\text{CD}_3\text{OD}$ )  $\delta$  172.8, 158.2, 138.0,

129.5, 129.1, 128.8, 68.4, 56.2, 49.9, 43.3, 33.7, 33.7, 28.5, 26.6, 25.7, 21.0 ppm; HRMS (ESI-Orbitrap)  $m/z$ :  $[M + Na]^+$  Calcd for  $C_{20}H_{28}N_2O_3Na^+$ : 367.1992, found: 367.1992.

***tert*-Butyl 2-(cyclohexylcarbamoyl)azepane-1-carboxylate (6f)**

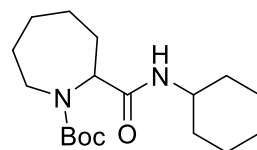

Eluent: PE/EA = 2:1, White Solid (123 mg, 38%); mp 118-120 °C; IR (film):  $\nu_{max}$  2928, 2854, 1695, 1647, 1448, 1407, 1365, 1163.  $^1H$  NMR (400 MHz,  $CD_3OD$ , mixture of rotamers)  $\delta$  4.36 (dd,  $J$  = 12.4, 6.0 Hz, 0.42H), 4.22 (dd,  $J$  = 12.4, 5.2 Hz, 0.58H), 3.96 (dd,  $J$  = 14.8, 4.8 Hz, 0.58H), 3.87-3.80 (m, 0.42H), 3.66-3.57 (m, 1H), 3.14-3.02 (m, 1H), 2.23-2.10 (m, 1H), 2.00-1.90 (m, 1H), 1.86-1.60 (m, 8H), 1.47 (s, 3.78H), 1.44 (s, 5.22H), 1.40-1.15 (m, 8H) ppm;  $^{13}C$  NMR (100 MHz,  $CD_3OD$ , mixture of rotamers)  $\delta$  174.8, 174.3, 157.8, 157.4, 81.5, 81.2, 62.4, 60.5, 49.6, 49.6, 45.2, 44.8, 34.0, 33.8, 33.7, 33.5, 32.8, 32.2, 31.3, 30.9, 30.4, 30.3, 28.7, 27.8, 26.9, 26.6, 26.2, 26.0 ppm; HRMS (ESI-Orbitrap)  $m/z$ :  $[M + Na]^+$  Calcd for  $C_{18}H_{32}N_2O_3Na^+$ : 347.2305, found: 347.2305.

***tert*-Butyl 2-((2,4,4-trimethylpentan-2-yl)carbamoyl)pyrrolidine-1-carboxylate (6g)**

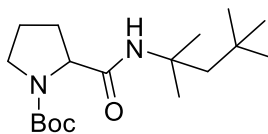

Eluent: PE/EA = 2:1, White Solid (239 mg, 73%); mp 67-68 °C; IR (film):  $\nu_{\max}$  2955, 1702, 1679, 1396, 1366, 1165, 1120.  $^1\text{H}$  NMR (400 MHz,  $\text{CD}_3\text{OD}$ , mixture of rotamers)  $\delta$  4.15-4.09 (m, 1H), 3.50-3.36 (m, 2H), 2.25-2.07 (m, 1H), 1.97-1.76 (m, 4H), 1.70-1.55 (m, 1H), 1.46 (s, 9H), 1.42 (s, 3H), 1.38 (s, 3H), 1.01 (s, 9H) ppm;  $^{13}\text{C}$  NMR (100 MHz,  $\text{CD}_3\text{OD}$ , mixture of rotamers)  $\delta$  174.1, 173.6, 156.5, 156.1, 81.3, 62.0, 56.2, 56.1, 52.3, 48.0, 32.4, 32.0, 30.6, 29.9, 29.6, 29.4, 28.8, 25.4, 24.5 ppm; HRMS (ESI-Orbitrap)  $m/z$ :  $[\text{M} + \text{Na}]^+$  Calcd for  $\text{C}_{18}\text{H}_{34}\text{N}_2\text{O}_3\text{Na}^+$ : 349.2462, found: 349.2458.

***tert*-Butyl 2-(*tert*-butylcarbamoyl)pyrrolidine-1-carboxylate (6h)**

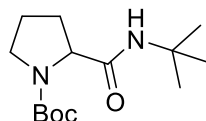

Eluent: PE/EA = 2:1, White Solid (216 mg, 80%); mp 125-126 °C; IR (film):  $\nu_{\max}$  2972, 2876, 1670, 1678, 1396, 1364, 1250, 1165, 1121.  $^1\text{H}$  NMR (400 MHz,  $\text{CD}_3\text{OD}$ , mixture of rotamers)  $\delta$  4.13-4.05 (m, 1H), 3.53-3.45 (m, 1H), 3.44-3.36 (m, 1H), 2.25-2.10 (m, 1H), 1.97-1.78 (m, 3H), 1.44 (s, 9H), 1.35 (s, 9H) ppm;  $^{13}\text{C}$  NMR (100 MHz,  $\text{CD}_3\text{OD}$ , mixture of rotamers)  $\delta$  174.8, 174.4, 156.4, 156.1, 81.2, 61.8, 51.9, 48.0, 32.7, 31.4, 29.0, 28.8, 25.3, 24.6 ppm; HRMS (ESI-Orbitrap)  $m/z$ :  $[\text{M} + \text{Na}]^+$  Calcd for  $\text{C}_{14}\text{H}_{26}\text{N}_2\text{O}_3\text{Na}^+$ : 293.1836, found: 293.1834.

***tert*-Butyl 2-((*tosylmethyl*)carbamoyl)pyrrolidine-1-carboxylate (6i)**

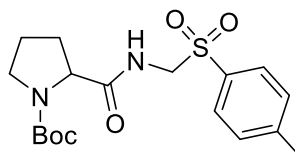

Eluent: PE/EA = 2:1, White Solid (256 mg, 67%); mp 69-71 °C; IR (film):  $\nu_{\max}$  2927, 2883, 2853, 1683, 1521, 1253, 1049, 834.  $^1\text{H}$  NMR (400 MHz,  $\text{CDCl}_3$ , mixture of rotamers)  $\delta$  7.83-7.79 (m, 2H), 7.47-7.41 (m, 2H), 4.96-4.80 (m, 3H), 4.59-4.51 (m, 1H), 4.17-4.10 (m, 1H), 3.47-3.40 (m, 1H), 2.46 (s, 3H), 2.19-2.03 (m, 1H), 1.85-1.63 (m, 3H), 1.47 (s, 3.7H), 1.40 (s, 5.3H) ppm;  $^{13}\text{C}$  NMR (100 MHz,  $\text{CDCl}_3$ , mixture of rotamers)  $\delta$  175.5, 175.0, 156.4, 155.8, 146.8, 146.7, 136.1, 136.0, 131.0, 130.2, 130.1, 81.6, 81.4, 61.6, 61.4, 61.2, 48.2, 47.8, 32.4, 31.2, 28.8, 28.7, 28.6, 25.2, 24.5, 21.7 ppm; HRMS (ESI-Orbitrap)  $m/z$ :  $[\text{M} + \text{Na}]^+$  Calcd for  $\text{C}_{18}\text{H}_{26}\text{N}_2\text{O}_5\text{SNa}^+$ : 405.1455, found: 405.1455.

***tert*-Butyl 2-((2-methoxy-2-oxoethyl)carbamoyl)pyrrolidine-1-carboxylate (6j)**

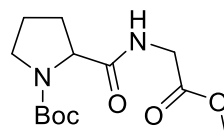

Eluent: PE/EA = 2:1, White Solid (203 mg, 71%); mp 138-139 °C; IR (film):  $\nu_{\max}$  2975, 1755, 1698, 1670, 1453, 1396, 1367, 1207, 1166, 1123.  $^1\text{H}$  NMR (400 MHz,  $\text{CD}_3\text{OD}$ , mixture of rotamers)  $\delta$  4.29-4.20 (m, 1H), 4.04-3.89 (m, 2H), 3.74 (s, 3H), 3.58-3.51 (m, 1H), 3.47-3.40 (m, 1H), 2.34-2.16 (m, 1H), 2.08-1.85 (m, 3H), 1.49 (s, 2.7H), 1.45 (s, 6.3H) ppm;  $^{13}\text{C}$  NMR (100 MHz,  $\text{CD}_3\text{OD}$ , mixture of rotamers)  $\delta$  176.4, 176.0, 171.6, 171.4, 156.5, 156.1, 81.6, 81.4, 61.9, 61.5, 52.6, 47.9, 41.8, 32.4, 31.4, 28.7, 28.6, 25.3, 24.6 ppm; HRMS (ESI-Orbitrap)  $m/z$ :  $[\text{M} + \text{Na}]^+$  Calcd for  $\text{C}_{13}\text{H}_{22}\text{N}_2\text{O}_5\text{Na}^+$ : 309.1421, found: 309.1416.

**1-Benzyl-N-(2-bromophenyl)-5-oxopyrrolidine-2-carboxamide (6k)**

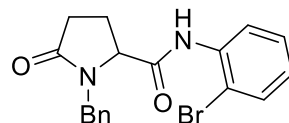

Eluent: PE/EA = 1:1, White Solid (298 mg, 80%); mp 159-160 °C; IR (film):  $\nu_{\max}$  3030, 1670, 1584, 1527, 1437, 1285, 1177, 752.  $^1\text{H}$  NMR (400 MHz,  $\text{CDCl}_3$ )  $\delta$  8.28-8.24 (m, 1H), 7.57-7.53 (m, 1H), 7.35-7.23 (m, 6H), 7.06-7.01 (m, 1H), 5.19 (d,  $J$  = 14.8 Hz, 1H), 4.03-4.01 (m, 1H), 4.00-3.96 (m, 1H), 2.73-2.64 (m, 1H), 2.53-2.44 (m, 1H), 2.42-2.33 (m, 1H), 2.23-2.14 (m, 1H) ppm;  $^{13}\text{C}$  NMR (100 MHz,  $\text{CDCl}_3$ )  $\delta$  175.7, 169.6, 169.5, 135.6, 134.8, 134.7, 132.4, 129.1, 128.8, 128.6, 128.2, 126.2, 122.2, 114.1, 114.0, 61.5, 46.1, 29.7, 23.8 ppm; HRMS (ESI-Orbitrap)  $m/z$ :  $[\text{M} + \text{Na}]^+$  Calcd for  $\text{C}_{18}\text{H}_{17}\text{BrN}_2\text{O}_2\text{Na}^+$ : 395.0366, 397.0345, 398.0379, found: 395.0367, 397.0345, 398.0375.

**1-Benzyl-N-(tert-butyl)-5-oxopyrrolidine-2-carboxamide (6l)**

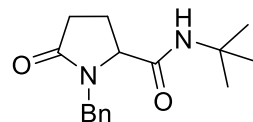

Eluent: PE/EA = 1:1, White Solid (192 mg, 70%); mp 116-118 °C; IR (film):  $\nu_{\max}$  2968, 2422, 1670, 1431, 1361, 1227, 701.  $^1\text{H}$  NMR (400 MHz,  $\text{CD}_3\text{OD}$ )  $\delta$  7.36-7.26 (m, 3H), 7.23-7.19 (m, 2H), 4.96 (d,  $J$  = 14.8 Hz, 1H), 3.93 (dd,  $J$  = 8.8, 4.4 Hz, 1H), 3.84 (d,  $J$  = 14.8 Hz, 1H), 2.61-2.51 (m, 1H), 2.43-2.34 (m, 1H), 2.26-2.16 (m, 1H), 1.95-1.86 (m, 1H), 1.31 (s, 9H) ppm;  $^{13}\text{C}$  NMR (100 MHz,  $\text{CD}_3\text{OD}$ )  $\delta$  178.3, 172.6, 137.2, 129.8, 129.4, 128.8, 61.8, 52.2, 46.5, 30.9, 28.7, 24.1 ppm; HRMS (ESI-Orbitrap)  $m/z$ :  $[\text{M} + \text{Na}]^+$  Calcd for  $\text{C}_{16}\text{H}_{22}\text{N}_2\text{O}_2\text{Na}^+$ : 297.1574, found: 297.1579.

**1-Benzyl-5-oxo-N-(tosylmethyl)pyrrolidine-2-carboxamide (6m)**

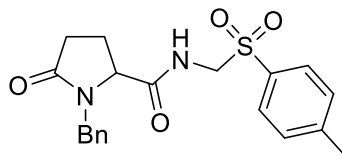

Eluent: PE/EA = 1:1, White Solid (340 mg, 88%); mp 152-153 °C; IR (film):  $\nu_{\max}$  3284, 2919, 2850, 1672, 1596, 1265, 1142, 746.  $^1\text{H}$  NMR (400 MHz,  $\text{CDCl}_3$ )  $\delta$  7.82-7.77 (m, 2H), 7.38-7.35 (m, 2H), 7.34-7.27 (m, 3H), 7.17-7.14 (m, 2H), 5.02 (d,  $J$  = 14.8 Hz, 1H), 4.67-4.64 (m, 2H), 3.83 (dd,  $J$  = 9.2, 3.2 Hz, 1H), 3.76 (d,  $J$  = 14.8 Hz, 1H), 2.54-2.46 (m, 1H), 2.45 (s, 3H), 2.43-2.35 (m, 1H), 2.25-2.13 (m, 1H), 1.82-1.73 (m, 1H) ppm;  $^{13}\text{C}$  NMR (100 MHz,  $\text{CDCl}_3$ )  $\delta$  175.8, 171.3, 145.9, 135.6, 134.3, 130.2, 129.1, 128.9, 128.6, 128.2, 60.3, 60.2, 45.8, 29.6, 23.5, 21.9 ppm; HRMS (ESI-Orbitrap)  $m/z$ :  $[\text{M} + \text{Na}]^+$  Calcd for  $\text{C}_{20}\text{H}_{22}\text{N}_2\text{O}_4\text{SNa}^+$ : 409.1193, 410.1223, 411.1151, found: 409.1194, 410.1220, 411.1151.

**Methyl (1-benzyl-5-oxopyrrolidine-2-carbonyl)glycinate (6n)**

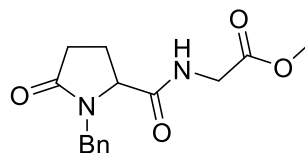

Eluent: PE/EA = 1:1, White Solid (197 mg, 68%); mp 61-63 °C; IR (film):  $\nu_{\max}$  2952, 1751, 1668, 1452, 1414, 1210, 704.  $^1\text{H}$  NMR (400 MHz,  $\text{CD}_3\text{OD}$ )  $\delta$  7.36-7.25 (m, 5H), 5.03 (d,  $J$  = 6.8 Hz, 1H), 4.03 (dd,  $J$  = 8.8, 4.0 Hz, 1H), 3.96-3.91 (m, 2H), 3.89-3.84 (m, 1H), 3.74 (s, 3H), 2.61-2.51 (m, 1H), 2.46-2.36 (m, 1H), 2.32-2.22 (m, 1H), 2.07-1.98 (m, 1H) ppm;  $^{13}\text{C}$  NMR (100 MHz,  $\text{CD}_3\text{OD}$ )  $\delta$  178.2, 174.3, 171.4, 137.1, 129.8, 129.5, 128.8, 61.3, 52.7, 46.3, 41.8, 30.7, 23.9 ppm; HRMS (ESI-Orbitrap)  $m/z$ :  $[\text{M} + \text{Na}]^+$  Calcd for  $\text{C}_{15}\text{H}_{18}\text{N}_2\text{O}_4\text{Na}^+$ : 313.1159, found: 313.1157.



***N*-([1,1'-biphenyl]-2-yl)-1-benzyl-5-oxopyrrolidine-2-carboxamide (6o)**

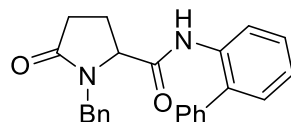

Eluent: PE/EA = 1:1, White Solid (248 mg, 67%); mp 117-119 °C; IR (film):  $\nu_{\max}$  3028, 1667, 1482, 1438, 1417, 1356, 752, 701.  $^1\text{H}$  NMR (400 MHz,  $\text{CD}_3\text{OD}$ )  $\delta$  7.43-7.23 (m, 12H), 7.19-7.13 (m, 2H), 4.91 (d,  $J = 14.8$  Hz, 1H), 3.99 (dd,  $J = 8.8, 3.2$  Hz, 1H), 3.69 (d,  $J = 14.8$  Hz, 1H), 2.48-2.38 (m, 1H), 2.37-2.28 (m, 1H), 2.20-2.09 (m, 1H), 1.84-1.75 (m, 1H) ppm;  $^{13}\text{C}$  NMR (100 MHz,  $\text{CD}_3\text{OD}$ )  $\delta$  178.2, 172.5, 140.6, 140.0, 137.0, 134.8, 131.6, 130.1, 129.8, 129.5, 129.1, 128.9, 128.6, 128.2, 61.4, 46.4, 30.6, 24.1 ppm; HRMS (ESI-Orbitrap)  $m/z$ :  $[\text{M} + \text{Na}]^+$  Calcd for  $\text{C}_{24}\text{H}_{22}\text{N}_2\text{O}_4\text{Na}^+$ : 393.1574, found: 393.1574.

**1-Benzyl-*N*-cyclohexyl-5-oxopyrrolidine-2-carboxamide (6p)**

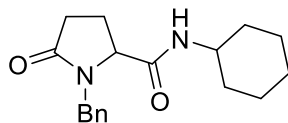

Eluent: PE/EA = 1:1, White Solid (228 mg, 76%); mp 140-141 °C; IR (film):  $\nu_{\max}$  2931, 2854, 2422, 1671, 1450, 1416, 1249, 702.  $^1\text{H}$  NMR (400 MHz,  $\text{CD}_3\text{OD}$ )  $\delta$  7.36-7.26 (m, 3H), 7.23-7.19 (m, 2H), 4.96 (d,  $J = 14.8$  Hz, 1H), 3.94 (dd,  $J = 8.8, 4.0$  Hz, 1H), 3.83 (d,  $J = 14.8$  Hz, 1H), 3.65-3.56 (m, 1H), 2.61-2.52 (m, 1H), 2.44-2.35 (m, 1H), 2.27-2.17 (m, 1H), 1.97-1.88 (m, 1H), 1.85-1.70 (m, 4H), 1.66-1.60 (m, 1H), 1.39-1.28 (m, 2H), 1.23-1.13 (m, 3H) ppm;  $^{13}\text{C}$  NMR (100 MHz,  $\text{CD}_3\text{OD}$ )  $\delta$  176.9, 171.0, 135.7, 128.5, 128.1, 127.5, 60.2, 48.5, 45.1, 32.4, 32.1, 29.5,

25.2, 24.7, 22.9 ppm; HRMS (ESI-Orbitrap)  $m/z$ :  $[M + Na]^+$  Calcd for  $C_{18}H_{24}N_2O_2Na^+$ : 323.1730, found: 323.1728.

**1-Benzyl-*N*-cyclohexyl-6-oxopiperidine-2-carboxamide (6q)**

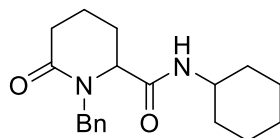

Eluent: PE/EA = 1:1, White Solid (257 mg, 82%); mp 113-115 °C; IR (film):  $\nu_{max}$  2931, 2854, 1626, 1450, 1330, 1249, 701.  $^1H$  NMR (400 MHz,  $CD_3OD$ )  $\delta$  7.36-7.27 (m, 3H), 7.26-7.21 (m, 2H), 5.44 (d,  $J$  = 15.2 Hz, 1H), 3.96 (dd,  $J$  = 4.8, 4.0 Hz, 1H), 3.70-3.62 (m, 2H), 2.56-2.41 (m, 2H), 1.97-1.94 (m, 2H), 1.93-1.70 (m, 6H), 1.70-1.63 (m, 1H), 1.42-1.31 (m, 2H), 1.28-1.14 (m, 3H) ppm;  $^{13}C$  NMR (100 MHz,  $CD_3OD$ )  $\delta$  173.5, 172.2, 137.9, 129.7, 129.2, 128.6, 60.6, 50.0, 49.9, 33.7, 33.5, 32.7, 28.4, 26.6, 26.1, 19.1 ppm; HRMS (ESI-Orbitrap)  $m/z$ :  $[M + Na]^+$  Calcd for  $C_{19}H_{26}N_2O_2Na^+$ : 337.1887, found: 337.1887.

**1-Benzyl-*N*-cyclohexyl-4,4-dimethyl-6-oxopiperidine-2-carboxamide (6r)**

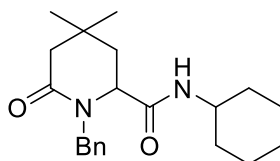

Eluent: PE/EA = 1:1, White Solid (246 mg, 72%); mp 126-128 °C; IR (film):  $\nu_{max}$  2931, 2855, 2412, 1625, 1449, 1345, 1306, 1249.  $^1H$  NMR (400 MHz,  $CD_3OD$ )  $\delta$  7.38-7.30 (m, 3H), 7.28-7.24 (m, 2H), 5.62 (d,  $J$  = 14.8 Hz, 1H), 3.85 (dd,  $J$  = 10.8, 6.4 Hz, 1H), 3.75-3.67 (m, 1H), 3.62 (d,  $J$  = 14.8 Hz, 1H), 2.37 (d,  $J$  = 16.8 Hz, 1H), 2.24 (dd,  $J$  = 16.8, 2.8 Hz, 1H), 2.00-1.93 (m, 1H), 1.85-1.73 (m, 5H), 1.70-1.65 (m, 1H), 1.45-1.33 (m, 2H), 1.30-1.15 (m, 3H), 1.03 (s, 3H), 0.87 (s, 3H) ppm;  $^{13}C$  NMR (100 MHz,  $CD_3OD$ )  $\delta$  173.0, 172.9, 137.8, 129.8, 129.7, 128.9,

59.3, 50.0, 48.3, 46.4, 40.8, 33.8, 33.5, 30.9, 30.5, 26.6, 26.1, 26.0, 24.7 ppm; HRMS (ESI-Orbitrap)  $m/z$ :  $[M + Na]^+$  Calcd for  $C_{21}H_{30}N_2O_2Na^+$ : 365.2200, found: 365.2199.

**8-Benzyl-*N*-cyclohexyl-9-oxo-8-azaspiro[4.5]decane-7-carboxamide (6s)**

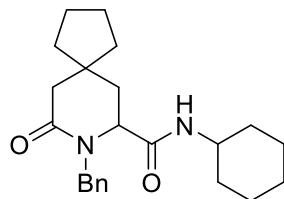

Eluent: PE/EA = 1:1, White Solid (269 mg, 73%); mp 111-112 °C; IR (film):  $\nu_{max}$  2930, 2854, 2413, 1623, 1448, 1344, 709.  $^1H$  NMR (400 MHz,  $CD_3OD$ )  $\delta$  7.35-7.25 (m, 3H), 7.24-7.19 (m, 2H), 5.59 (d,  $J = 14.8$  Hz, 1H), 3.85 (dd,  $J = 10.4, 6.4$  Hz, 1H), 3.72-3.63 (m, 1H), 3.59 (d,  $J = 14.8$  Hz, 1H), 2.45 (d,  $J = 16.8$  Hz, 1H), 2.34 (dd,  $J = 16.8, 2.4$  Hz, 1H), 1.96-1.89 (m, 1H), 1.87-1.72 (m, 5H), 1.70-1.61 (m, 5H), 1.50-1.44 (m, 2H), 1.40-1.28 (m, 4H), 1.26-1.12 (m, 3H) ppm;  $^{13}C$  NMR (100 MHz,  $CD_3OD$ )  $\delta$  173.3, 172.5, 137.8, 129.7, 129.6, 128.8, 59.8, 50.0, 45.2, 42.0, 40.8, 39.2, 35.8, 33.8, 33.5, 26.6, 26.1, 26.1, 25.5, 24.8 ppm; HRMS (ESI-Orbitrap)  $m/z$ :  $[M + Na]^+$  Calcd for  $C_{23}H_{32}N_2O_2Na^+$ : 391.2356, found: 391.2358.

**(1*S*,3*aR*,7*aS*)-2-Benzyl-*N*-cyclohexyl-3-oxooctahydro-1*H*-isoindole-1-carboxamide (6t)**

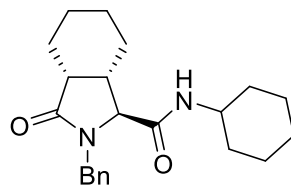

Eluent: PE/EA = 1:1, White Solid (322 mg, 91%); mp 131-133 °C; IR (film):  $\nu_{max}$  2929, 2853, 1669, 1446, 1349, 1302, 1248.  $^1H$  NMR (400

MHz, CD<sub>3</sub>OD)  $\delta$  7.39-7.30 (m, 3H), 7.26-7.22 (m, 2H), 5.02 (d,  $J$  = 14.8 Hz, 1H), 3.81 (d,  $J$  = 14.4 Hz, 1H), 3.68-3.59 (m, 1H), 3.45 (d,  $J$  = 2.8 Hz, 1H), 2.80 (dd,  $J$  = 10.8, 6.4 Hz, 1H), 3.34-3.27 (m, 1H), 1.98-1.90 (m, 1H), 1.87-1.72 (m, 5H), 1.68-1.60 (m, 2H), 1.55-1.48 (m, 2H), 1.40-1.31 (m, 2H), 1.27-1.14 (m, 5H), 1.13-1.02 (m, 1H) ppm; <sup>13</sup>C NMR (100 MHz, CD<sub>3</sub>OD)  $\delta$  179.0, 171.4, 137.3, 129.9, 129.7, 129.0, 65.6, 50.0, 46.8, 41.7, 39.5, 33.8, 33.6, 29.1, 26.6, 26.1, 24.5, 24.4, 24.0 ppm; HRMS (ESI-Orbitrap)  $m/z$ : [M + Na]<sup>+</sup> Calcd for C<sub>22</sub>H<sub>30</sub>N<sub>2</sub>O<sub>2</sub>Na<sup>+</sup>: 377.2200, found: 377.2198.

### General Procedure C: Synthesis of 7

To a solution of *trans*- 4-hydroxy-5-substituted 2-pyrrolidinones<sup>1</sup> (2 mmol) in dry THF (8 mL) was added a solution of LiHBET<sub>3</sub> in THF (1 M, 1.1 equiv, 2.2 mL) at -78 °C. The reaction mixture was stirred for 1 h at the same temperature, and the reaction was quenched with water (5 mL) and warmed to room temperature. To the mixture were added saturated aqueous NaHCO<sub>3</sub> (20 mL) and 30% H<sub>2</sub>O<sub>2</sub> solution (5 mL). After stirring for 1 h, the mixture was extracted with ethyl acetate (20 mL  $\times$  3), and the combined organic layers were washed with brine. Dried, filtered, and concentrated to give the *N,O*-acetal 7 without further purifications<sup>2</sup>.

### General Procedure D: Synthesis of 8

*N,O*-acetal 7 (1.0 mmol), isocyanides 3 (1.0 mmol) were dissolved in THF (5 mL) at -78°C, then Cu(OTf)<sub>2</sub> (0.2 mmol) was added. The reaction was stirred at -78 °C to room temperature overnight then quenched with a saturated NaHCO<sub>3</sub> aqueous solution and extracted with EtOAc (30 mL  $\times$  3). The combined organic layers were washed with brine, dried, filtered and concentrated. The residue was purified by flash chromatography on silica gel (PE/EA = 2:1 - 1:1) to give the desired product 8.

***tert*-butyl (2*S*,4*S*)-2-(cyclohexylcarbamoyl)-4-hydroxypyrrolidine-1-carboxylate (8a)**

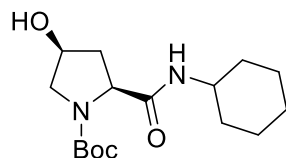

Eluent: PE/EA = 1:1, White Solid (237 mg, 76%); mp 129-131 °C;  $[\alpha]_D^{22} = -49.2$  (*c* 2.00, CHCl<sub>3</sub>), IR (film):  $\nu_{\max}$  2933, 1701, 1677, 1646, 1452, 1396, 1367, 1163, 1125, 1085. <sup>1</sup>H NMR (400 MHz, CD<sub>3</sub>OD, mixture of rotamers)  $\delta$  4.33-4.25 (m, 1H), 4.20-4.10 (m, 1H), 3.58-3.51 (m, 1H), 3.50-3.43 (m, 1H), 2.47-2.30 (m, 1H), 2.00-1.86 (m, 1H), 1.48 (s, 9H), 1.37 (s, 9H) ppm; <sup>13</sup>C NMR (100 MHz, CD<sub>3</sub>OD, mixture of rotamers)  $\delta$  175.2, 174.9, 156.3, 156.1, 81.8, 81.5, 71.3, 70.5, 61.4, 56.8, 56.3, 52.1, 39.7, 38.7, 30.3, 28.8, 28.7. HRMS (ESI-Orbitrap) *m/z*: [M + Na]<sup>+</sup> Calcd for C<sub>16</sub>H<sub>28</sub>N<sub>2</sub>O<sub>4</sub>Na<sup>+</sup>: 335.1941, found: 335.1938.

***tert*-butyl (2*S*,4*S*)-2-(*tert*-butylcarbamoyl)-4-hydroxypyrrolidine-1-carboxylate (8b)**

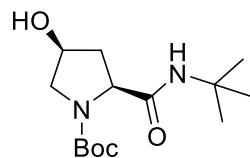

Eluent: PE/EA = 1:1, White Solid (188 mg, 66%); mp 139-142 °C;  $[\alpha]_D^{22} = -68.1$  (*c* 1.00, CD<sub>3</sub>OD, mixture of rotamers), IR (film):  $\nu_{\max}$  2972, 1701, 1651, 1394, 1365, 1162, 1123. <sup>1</sup>H NMR (400 MHz, CD<sub>3</sub>OD)  $\delta$  4.37-4.27 (m, 1H), 4.23-4.15 (m, 1H), 3.72-3.63 (m, 1H), 3.60-3.53 (m, 1H), 3.50-3.43 (m, 1H), 2.50-2.35 (m, 1H), 1.95-1.63 (m, 6H), 1.46 (s, 9H), 1.43-1.34 (m, 2H), 1.32-1.21 (m, 3H) ppm; <sup>13</sup>C NMR (100 MHz, CD<sub>3</sub>OD, mixture of rotamers)  $\delta$  175.0, 174.7, 156.4, 156.1, 81.8, 81.5, 71.3, 70.5, 61.5, 56.8, 56.2, 39.9, 38.9, 33.7, 28.7, 26.6, 26.0 ppm. HRMS (ESI-Orbitrap) *m/z*: [M + Na]<sup>+</sup> Calcd for C<sub>14</sub>H<sub>26</sub>N<sub>2</sub>O<sub>4</sub>Na<sup>+</sup>: 309.1785, found: 309.1784.

***tert*-butyl (2*S*,4*S*)-2-((4-bromobenzyl)carbamoyl)-4-hydroxypyrrolidine-1-carboxylate (8c)**

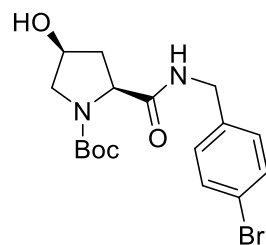

Eluent: PE/EA = 1:1, White Solid (259 mg, 65%); mp 109-111 °C;  $[\alpha]_D^{23} = -12.6$  (*c* 0.50, CD<sub>3</sub>OD, mixture of rotamers), IR (film):  $\nu_{\max}$  2977, 1653, 1488, 1403, 1162, 1125. <sup>1</sup>H NMR (400 MHz, CD<sub>3</sub>OD)  $\delta$  6.73-6.59 (m, 2H), 6.53-6.39 (m, 2H), 3.65-3.40 (m, 4H), 2.82-2.75 (m, 1H), 2.67-2.60 (m, 1H), 1.69-1.56 (m, 1H), 1.25-1.17 (m, 1H), 0.68 (s, 3.5H), 0.55 (s, 5.5H) ppm; <sup>13</sup>C NMR (100 MHz, CD<sub>3</sub>OD, mixture of rotamers)  $\delta$  173.1, 151.3, 136.5, 129.8, 128.2, 127.6, 79.1, 78.9, 68.5, 67.7, 58.5, 58.4, 53.9, 53.4, 40.8, 40.7, 37.2, 36.2, 25.8 ppm. HRMS (ESI-Orbitrap) *m/z*: [M + Na]<sup>+</sup> Calcd for C<sub>23</sub>H<sub>27</sub>BrN<sub>2</sub>O<sub>4</sub>Na<sup>+</sup>: 421.0733, 427.0717, found: 421.0735, 423.0714.

***tert*-butyl (2*R*,3*S*,5*S*)-5-(*tert*-butylcarbamoyl)-3-hydroxy-2-phenylpyrrolidine-1-carboxylate (8d)**

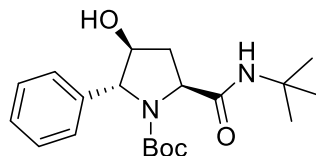

Eluent: PE/EA = 2:1, White Solid (235 mg, 65%); mp 138-140 °C;  $[\alpha]_D^{21} = +78.7$  (*c* 2.00, CHCl<sub>3</sub>), IR (film):  $\nu_{\max}$  2793, 1701, 1681, 1651, 1450, 1390, 1366, 1163, 1126. <sup>1</sup>H NMR (400 MHz, CD<sub>3</sub>OD, mixture of rotamers)  $\delta$  7.40-7.34 (m, 2H), 7.30-7.23 (m, 1H), 7.20-7.15 (m, 2H), 5.10-5.03 (m, 0.59H), 4.94-4.92 (m, 0.41H), 4.54-4.49 (m, 0.41H), 4.49-4.44 (m, 0.59H), 4.06-4.00 (m, 1H), 2.47-2.37 (m, 1H), 1.90-1.79 (m, 1H), 1.49 (s, 5.31H), 1.42 (s, 5.31H), 1.39 (s, 3.69H), 1.21 (s, 3.69H) ppm; <sup>13</sup>C NMR (100 MHz, CD<sub>3</sub>OD, mixture of rotamers)  $\delta$  175.6, 175.1,

156.0, 155.7, 142.5, 141.4, 129.8, 129.7, 128.39, 128.36, 126.3, 82.2, 81.5, 79.4, 78.8, 73.7, 73.1, 62.8, 62.7, 52.30, 52.26, 36.3, 35.6, 28.9, 28.8, 28.7, 28.4 ppm. HRMS (ESI-Orbitrap)  $m/z$ :  $[M + Na]^+$  Calcd for  $C_{20}H_{30}N_2O_4Na^+$ : 385.2098, found: 385.2095.

***tert*-butyl (2*R*,3*S*,5*S*)-5-((4-bromobenzyl)carbamoyl)-3-hydroxy-2-phenylpyrrolidine-1-carboxylate (8e)**

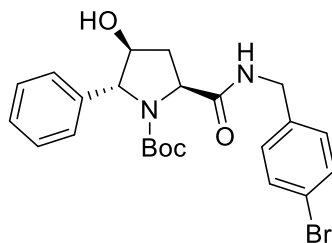

Eluent: PE/EA = 2:1, White Solid (314 mg, 66%); mp 111-113 °C;  $[\alpha]_D^{24} = -28.9$  ( $c$  1.00,  $CHCl_3$ ), IR (film):  $\nu_{max}$  2977, 1650, 1488, 1390, 1162, 1129, 1067, 750, 700.  $^1H$  NMR (400 MHz,  $CD_3OD$ , mixture of rotamers)  $\delta$  7.61-7.41 (m, 2H), 7.40-7.23 (m, 5H), 7.22-7.10 (m, 2H), 5.12-4.88 (m, 1H), 4.68-4.54 (m, 1H), 4.52-4.33 (m, 2H), 4.12-4.02 (m, 1H), 2.57-2.39 (m, 1H), 1.98-1.87 (m, 1H), 1.36 (s, 4H), 1.20 (s, 5H) ppm;  $^{13}C$  NMR (100 MHz,  $CD_3OD$ , mixture of rotamers)  $\delta$  174.7, 174.5, 154.8, 154.1, 141.2, 140.0, 137.7, 131.3, 131.1, 129.7, 129.0, 128.3, 128.2, 127.0, 125.1, 124.9, 120.8, 120.4, 80.8, 80.2, 78.0, 77.4, 72.2, 71.6, 61.0, 60.8, 42.5, 42.2, 35.0, 34.4, 27.1, 26.9 ppm. HRMS (ESI-Orbitrap)  $m/z$ :  $[M + Na]^+$  Calcd for  $C_{23}H_{27}BrN_2O_4Na^+$ : 497.1046, 499.1026 found: 497.1045, 499.1024.

***tert*-butyl (2*R*,3*S*,5*S*)-5-(cyclohexylcarbamoyl)-3-hydroxy-2-phenylpyrrolidine-1-carboxylate (8f)**

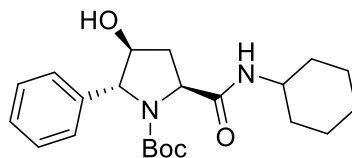

Eluent: PE/EA = 2:1, White Solid (217 mg, 56%); mp 127-129 °C;  $[\alpha]_D^{23} = -41.2$  (*c* 1.00, CHCl<sub>3</sub>), IR (film):  $\nu_{\max}$  2931, 2855, 2435, 1700, 1645, 1452, 1386, 1162, 1127. <sup>1</sup>H NMR (400 MHz, CD<sub>3</sub>OD, mixture of rotamers)  $\delta$  7.41-7.34 (m, 2H), 7.31-7.24 (m, 1H), 7.20-7.15 (m, 2H), 5.10-5.04 (m, 0.54H), 4.96-4.90 (m, 0.46H), 4.60-4.54 (m, 0.46H), 4.54-4.49 (m, 0.54H), 4.07-4.02 (m, 1H), 3.76-3.67 (m, 1H), 2.52-2.37 (m, 1H), 2.00-1.75 (m, 5H), 1.72-1.63 (m, 1H), 1.46 (s, 4.86H), 1.43-1.24 (m, 5H), 1.21 (s, 4.14H) ppm; <sup>13</sup>C NMR (100 MHz, CD<sub>3</sub>OD, mixture of rotamers)  $\delta$  175.4, 174.8, 156.0, 155.6, 142.5, 141.4, 129.8, 129.7, 128.39, 128.36, 126.5, 126.3, 82.3, 81.5, 79.4, 78.8, 73.6, 73.1, 62.3, 62.1, 50.2, 50.0, 36.5, 35.7, 33.72, 33.69, 33.5, 33.3, 28.7, 28.3, 26.7, 26.6, 26.0, 25.9 ppm. HRMS (ESI-Orbitrap) *m/z*: [M + Na]<sup>+</sup> Calcd for C<sub>22</sub>H<sub>32</sub>N<sub>2</sub>O<sub>4</sub>Na<sup>+</sup>: 411.2254, found: 411.2253.

***tert*-Butyl (2*R*,3*S*,5*S*)-3-hydroxy-5-((2-methoxy-2-oxoethyl)carbamoyl)-2-phenylpyrrolidine-1-carboxylate (8g)**

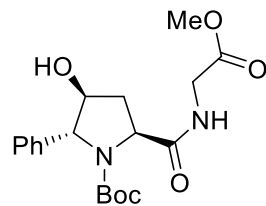

Eluent: PE/EA = 2:1, White Solid (197 mg, 52%); mp 107-109 °C;  $[\alpha]_D^{23} = -22.2$  (*c* 1.00, CHCl<sub>3</sub>), IR (film):  $\nu_{\max}$  2976, 1650, 1488, 1390, 1162, 1129, 1067, 750, 700. <sup>1</sup>H NMR (400 MHz, CD<sub>3</sub>OD, mixture of rotamers)  $\delta$  7.46-7.42 (m, 2H), 7.38-7.33 (m, 1H), 7.29-7.24 (m, 2H), 5.15-5.00 (m, 1H), 4.75-4.65 (m, 1H), 4.15-4.00 (m, 4H), 3.84 (s, 1.47H), 3.83 (s, 1.53H), 2.65-2.47 (m, 1H), 2.12-1.98 (m, 1H), 1.52 (s, 4.6H), 1.27 (s, 4.4H) ppm; <sup>13</sup>C NMR (100 MHz, CD<sub>3</sub>OD, mixture of rotamers)  $\delta$  176.9, 176.3, 156.2, 155.6, 142.6, 142.4, 129.8, 129.7, 128.4, 128.0, 126.5, 126.4, 82.4, 81.6, 79.4, 78.8, 62.2, 61.9, 52.6, 42.2, 42.1, 36.3, 36.7, 28.6, 28.3 ppm. HRMS (ESI-Orbitrap) *m/z*: [M + Na]<sup>+</sup> Calcd for C<sub>19</sub>H<sub>26</sub>N<sub>2</sub>O<sub>6</sub>Na<sup>+</sup>: 401.1683 found: 401.1685.



***tert*-butyl (2*R*,3*S*,5*S*)-5-(*tert*-butylcarbamoyl)-3-hydroxy-2-(*m*-tolyl)pyrrolidine-1-carboxylate (8h)**

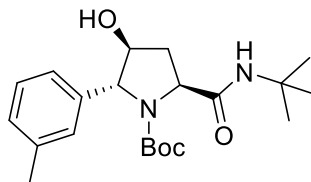

Eluent: PE/EA = 2:1, White Solid (229 mg, 61%); mp 153-155 °C;  $[\alpha]_D^{22} = +54.0$  (*c* 1.00, CHCl<sub>3</sub>), IR (film):  $\nu_{\max}$  2972, 2436, 1652, 1607, 1390, 1366, 1165, 1124. <sup>1</sup>H NMR (400 MHz, CD<sub>3</sub>OD, mixture of rotamers)  $\delta$  7.27-7.21 (m, 1H), 7.13-7.06 (m, 1H), 7.01-6.92 (m, 2H), 5.04-5.00 (m, 1H), 4.52-4.43 (m, 1H), 4.05-3.98 (m, 1H), 2.47-2.38 (m, 1H), 2.36-2.34 (m, 3H), 1.89-1.78 (m, 1H), 1.49 (s, 5.13H), 1.41 (s, 5.13H), 1.39 (s, 3.87H), 1.22 (s, 3.87H) ppm; <sup>13</sup>C NMR (100 MHz, CD<sub>3</sub>OD, mixture of rotamers)  $\delta$  178.1, 177.6, 158.6, 158.2, 145.0, 143.9, 142.1, 142.0, 132.2, 132.1, 131.6, 131.5, 129.6, 129.5, 126.0, 125.8, 84.7, 84.0, 81.9, 81.3, 76.2, 75.6, 65.4, 65.2, 54.81, 54.77, 38.9, 38.1, 31.7, 31.4, 31.3, 31.2, 30.9, 24.1, 24.0 ppm. HRMS (ESI-Orbitrap) *m/z*: [M + Na]<sup>+</sup> Calcd for C<sub>21</sub>H<sub>32</sub>N<sub>2</sub>O<sub>4</sub>Na<sup>+</sup>: 399.2254, found: 399.2255.

***tert*-butyl (2*R*,3*S*,5*S*)-5-(*tert*-butylcarbamoyl)-2-cyclopropyl-3-hydroxypyrrolidine-1-carboxylate (8i)**

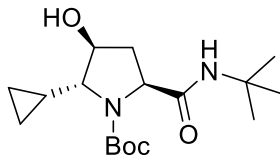

Eluent: PE/EA = 2:1, White Solid (235 mg, 72%); mp 135-136 °C;  $[\alpha]_D^{21} = -41.5$  (*c* 0.20, CHCl<sub>3</sub>), IR (film):  $\nu_{\max}$  2972, 1698, 1650, 1388, 1366, 1171, 1121. <sup>1</sup>H NMR (400 MHz, CD<sub>3</sub>OD, mixture of rotamers)  $\delta$  4.20-4.15 (m, 1H), 4.14-4.08 (m, 1H), 3.53-3.47 (m, 0.63H), 3.33-3.28 (m, 0.41H), 2.65-2.52 (m, 1H), 1.90-1.80 (m, 1H), 1.49 (s, 3.33H), 1.47 (s, 5.67H), 1.37 (s, 5.67H), 1.34 (s, 3.33H), 0.75-0.66 (m, 1H), 0.64-0.42 (m,

3H), 0.30-0.22 (m, 1H) ppm;  $^{13}\text{C}$  NMR (100 MHz,  $\text{CD}_3\text{OD}$ , mixture of rotamers)  $\delta$  173.9, 173.3, 154.2, 154.0, 79.5, 79.3, 74.8, 73.9, 71.1, 70.6, 59.9, 50.0, 35.5, 34.3, 26.7, 26.6, 26.5, 13.0, 12.8, 3.5, 2.6 ppm. HRMS (ESI-Orbitrap)  $m/z$ :  $[\text{M} + \text{Na}]^+$  Calcd for  $\text{C}_{17}\text{H}_{30}\text{N}_2\text{O}_4\text{Na}^+$ : 349.2098, found: 349.2098.

***tert*-butyl (2*R*,3*S*,5*S*)-2-allyl-5-(*tert*-butylcarbamoyl)-3-hydroxypyrrolidine-1-carboxylate (8j)**

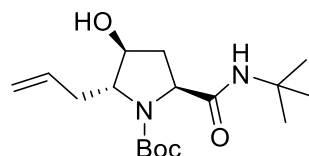

Eluent: PE/EA = 2:1, White Solid (238 mg, 73%); mp 131-133 °C;  $[\alpha]_{\text{D}}^{23} = -29.2$  ( $c$  0.50,  $\text{CHCl}_3$ ), IR (film):  $\nu_{\text{max}}$  2974, 2430, 1698, 1679, 1650, 1440, 1392, 1366, 1171, 1127.  $^1\text{H}$  NMR (400 MHz,  $\text{CD}_3\text{OD}$ , mixture of rotamers)  $\delta$  5.09-4.96 (m, 1H), 4.35-4.26 (m, 2H), 3.36-3.28 (m, 1H), 3.27-3.20 (m, 1H), 3.16-3.04 (m, 1H), 1.75-1.57 (m, 2H), 1.33-1.21 (m, 1H), 1.06-0.98 (m, 1H), 0.69 (s, 2.8H), 0.67 (s, 6.2H), 0.56 (s, 6.2H), 0.54 (s, 2.8H) ppm;  $^{13}\text{C}$  NMR (100 MHz,  $\text{CD}_3\text{OD}$ , mixture of rotamers)  $\delta$  173.1, 172.7, 153.0, 152.9, 133.0, 132.9, 115.44, 115.38, 79.1, 78.8, 72.4, 71.5, 66.3, 66.1, 59.43, 59.38, 49.44, 49.40, 35.5, 34.7, 34.4, 33.6, 26.1, 26.0 ppm. HRMS (ESI-Orbitrap)  $m/z$ :  $[\text{M} + \text{Na}]^+$  Calcd for  $\text{C}_{17}\text{H}_{30}\text{N}_2\text{O}_4\text{Na}^+$ : 349.2098, found: 349.2098.

***tert*-butyl (2*R*,3*S*,5*S*)-2-allyl-5-((4-bromobenzyl)carbamoyl)-3-hydroxypyrrolidine-1-carboxylate (8k)**

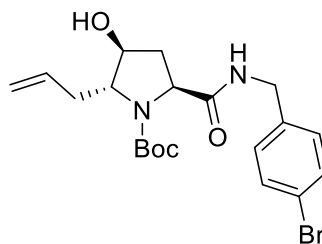

Eluent: PE/EA = 2:1, White Solid (285 mg, 65%); mp 121-123 °C;  $[\alpha]_D^{24} = +13.0$  (*c* 1.00, CHCl<sub>3</sub>), IR (film):  $\nu_{\max}$  2977, 1651, 1391, 1254, 1168, 1130, 772, 631. <sup>1</sup>H NMR (400 MHz, CD<sub>3</sub>OD, mixture of rotamers)  $\delta$  6.73-6.60 (m, 2H), 6.51-6.41 (m, 2H), 5.10-4.95 (m, 1H), 4.38-4.26 (m, 2H), 3.63-3.40 (m, 3H), 3.31-3.24 (m, 1H), 3.19-3.04 (m, 1H), 1.80-1.60 (m, 2H), 1.37-1.25 (m, 1H), 1.15-1.05 (m, 1H), 0.70 (s, 3.7H), 0.54 (s, 5.3H) ppm; <sup>13</sup>C NMR (100 MHz, CD<sub>3</sub>OD, mixture of rotamers)  $\delta$  173.7, 173.5, 153.2, 152.8, 136.31, 136.29, 132.92, 132.86, 130.0, 129.8, 128.4, 127.7, 119.4, 119.1, 115.5, 79.2, 79.0, 72.5, 71.5, 66.2, 66.0, 59.0, 58.8, 41.1, 40.8, 35.4, 34.8, 34.3, 33.8, 26.0, 25.8 ppm. HRMS (ESI-Orbitrap) *m/z*: [M + Na]<sup>+</sup> Calcd for C<sub>20</sub>H<sub>27</sub>BrN<sub>2</sub>O<sub>4</sub>Na<sup>+</sup>: 461.1046, 463.1026, found: 461.1049, 463.1028.

***tert*-butyl (2*R*,3*S*,5*S*)-5-((3-(benzyloxy)-3-oxopropyl)carbamoyl)-2-((benzyloxy)methyl)-3-hydroxypyrrolidine-1-carboxylate (8l)**

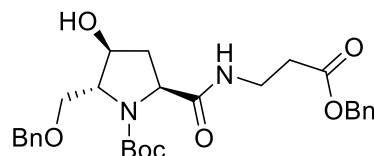

Eluent: PE/EA = 2:1, White Solid (246 mg, 48%),  $[\alpha]_D^{22} = -16.7$  (*c* 1.00, CHCl<sub>3</sub>), IR (film):  $\nu_{\max}$  2975, 1734, 1658, 1454, 1389, 1255, 1171, 1127, 1085, 739, 698. <sup>1</sup>H NMR (400 MHz, CD<sub>3</sub>OD, mixture of rotamers)  $\delta$  7.40-7.29 (m, 10H), 5.17-5.12 (m, 2H), 4.56-4.46 (m, 2H), 4.27-4.17 (m, 2H), 4.07-3.92 (m, 1H), 3.61-3.56 (m, 2H), 3.52-3.40 (m, 2H), 2.65-2.53 (m, 3H), 1.85-1.77 (m, 1H), 1.42 (s, 5.3H), 1.40 (s, 3.7H) ppm; <sup>13</sup>C NMR (100 MHz, CD<sub>3</sub>OD, mixture of rotamers)  $\delta$  176.8, 176.3, 173.2, 173.0, 155.8, 155.5, 139.7, 139.6, 137.6, 137.5, 129.6, 129.5, 129.4, 129.33, 129.28, 129.25, 129.2, 128.8, 128.71, 128.68, 82.0, 81.8, 75.3, 74.4, 74.35, 74.27, 70.1, 69.5, 68.9, 68.8, 67.5, 67.4, 62.1, 62.0, 38.4, 37.3, 36.44, 36.38, 34.8, 34.7, 28.7 ppm. HRMS (ESI-Orbitrap) *m/z*: [M + Na]<sup>+</sup> Calcd for C<sub>28</sub>H<sub>36</sub>N<sub>2</sub>O<sub>7</sub>Na<sup>+</sup>: 535.2415, found: 535.2418.

**(±) *tert*-Butyl (2*R*,4*R*)-2-(*tert*-butylcarbamoyl)-4-(4-chlorophenyl)pyrrolidine-1-carboxylate (14)**

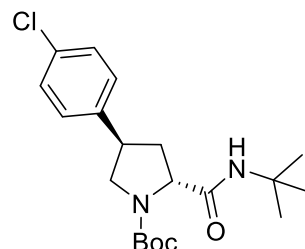

(±) *tert*-butyl (4R)-4-(4-chlorophenyl)-2-hydroxypyrrolidine-1-carboxylate (**13**) was synthesized according to the General Procedure C from (±) *tert*-butyl (R)-4-(4-chlorophenyl)-2-oxopyrrolidine-1-carboxylate<sup>3</sup>. **14** was synthesized from *N,O*-acetal **13** according to the General Procedure D. Eluent: PE/EA = 4:1, White Solid (320 mg, 84%), mp 121-123 °C; IR (film):  $\nu_{\text{max}}$  2813, 2071, 1906, 1762, 1594, 1423. <sup>1</sup>H NMR (400 MHz, CD<sub>3</sub>OD)  $\delta$  7.36-7.30 (m, 2H), 7.29-7.24 (m, 2H), 4.36-4.25 (m, 1H), 3.98-3.88 (m, 1H), 3.63-3.53 (m, 1H), 3.40-3.33 (m, 1H), 2.41-2.18 (m, 2H), 1.48 (s, 9H), 1.38 (s, 9H) ppm; <sup>13</sup>C NMR (100 MHz, CD<sub>3</sub>OD)  $\delta$  174.4, 155.9, 141.2, 133.7, 129.8, 81.6, 61.8, 54.1, 52.0, 42.3, 39.7, 29.0, 28.7 ppm. HRMS (ESI-Orbitrap) *m/z*: [M + H]<sup>+</sup> Calcd for C<sub>20</sub>H<sub>30</sub>ClN<sub>2</sub>O<sub>3</sub><sup>+</sup>: 381.1940, found: 381.1940.

***tert*-Butyl (2S,4R)-2-((4-bromobenzyl)carbamoyl)-4-fluoropyrrolidine-1-carboxylate (9)**

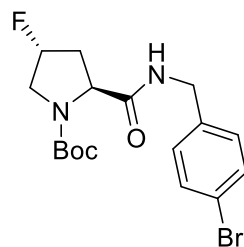

A solution of **8c** (400 mg, 1.0 mmol) in DCM (3 mL) was added DAST (0.67 mL, 5 mmol) at 0°C. After been stirred at 0°C to room temperature for 4 h, saturated NaHCO<sub>3</sub> aqueous solution was added and extracted with DCM (10 mL × 3). The combined organic layers were washed with

brine, dried, filtrated and concentrated. The residue was purified by flash chromatography on silica gel (PE/EA = 1:1) to give the desired product **9**.

White Solid (188 mg, 47%); mp 130-131 °C;  $[\alpha]_D^{22} = -36.8$  (*c* 0.50, CHCl<sub>3</sub>), IR (film):  $\nu_{\max}$  2978, 1663, 1554, 1488, 1406, 1367, 1162, 1128, 773. <sup>1</sup>H NMR (400 MHz, CD<sub>3</sub>OD, mixture of rotamers)  $\delta$  7.51-7.44 (m, 2H), 7.30-7.21 (m, 2H), 5.35-5.15 (m, 1H), 4.45-4.27 (m, 3H), 3.90-3.78 (m, 1H), 3.72-3.53 (m, 1H), 2.64-2.48 (m, 1H), 2.24-2.01 (m, 1H), 1.50 (s, 3.5H), 1.36 (s, 5.5H) ppm; <sup>13</sup>C NMR (100 MHz, CD<sub>3</sub>OD, mixture of rotamers)  $\delta$  173.5, 173.3, 154.8, 154.5, 137.7, 131.2, 131.1, 130.9, 129.6, 128.9, 128.6, 120.7, 120.3, 91.0 (d, <sup>1</sup>J<sub>C-F</sub> = 174.8 MHz), 91.2 (d, <sup>1</sup>J<sub>C-F</sub> = 175.5 MHz), 80.6, 80.4, 58.9, 58.7, 53.6 (d, <sup>2</sup>J<sub>C-F</sub> = 22.4 MHz), 53.1 (d, <sup>2</sup>J<sub>C-F</sub> = 22.5 MHz), 43.1, 42.2, 41.9, 40.8, 37.7 (d, <sup>2</sup>J<sub>C-F</sub> = 22.0 MHz), 36.7 (d, <sup>2</sup>J<sub>C-F</sub> = 22.3 MHz), 27.2, 27.0 ppm; <sup>19</sup>F NMR (376 MHz, CD<sub>3</sub>OD, mixture of rotamers)  $\delta$  -180.4, -180.9 ppm. HRMS (ESI-Orbitrap) *m/z*: [M + Na]<sup>+</sup> Calcd for C<sub>17</sub>H<sub>22</sub>BrFN<sub>2</sub>O<sub>3</sub>Na<sup>+</sup>: 423.0690, 425.0670, found: 423.0690, 425.0668.

***tert*-butyl ((*S*)-1-((2*S*,4*R*)-2-((4-bromobenzyl)carbamoyl)-4-fluoropyrrolidin-1-yl)-3,3-dimethyl-1-oxobutan-2-yl)carbamate (10)**

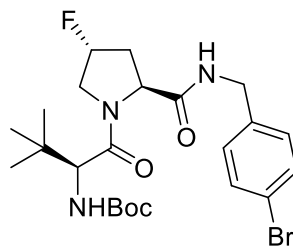

A solution of **9** (150 mg, 0.37 mmol) in TFA/DCM (1/1 mL) was stirred at room temperature for 1 h. The mixture was evaporated under reduced pressure to give the corresponding intermediate further purification. The corresponding intermediate was dissolved in DMF (1 mL), Boc-*L*-*tert*-Leu (86 mg, 0.37 mmol), HATU (156 mg, 0.41 mmol) and DIPEA (0.26 mL, 1.48 mmol) were added. After been stirred at room

temperature for 3 h, water was added and extracted with EtOAc (10 mL × 3). The combined organic layers were washed with brine, dried, filtrated and concentrated. The residue was purified by flash chromatography on silica gel (PE/EA = 1:1) to give the desired product **10**.

White Foam (158 mg, 83%)  $[\alpha]_D^{22} = -23.0$  (*c* 0.50, CHCl<sub>3</sub>), IR (film):  $\nu_{\max}$  2972, 1674, 1641, 1492, 1402, 1362, 1166. <sup>1</sup>H NMR (400 MHz, CD<sub>3</sub>OD, mixture of rotamers)  $\delta$  7.49-7.43 (m, 2H), 7.33-7.24 (m, 2H), 5.46-5.26 (m, 1H), 4.61-4.53 (m, 1H), 4.51-4.43 (m, 1H), 4.35-4.20 (m, 3H), 3.95-3.78 (m, 1H), 2.63-2.48 (m, 1H), 2.28-2.08 (m, 1H), 1.46 (s, 9H), 1.03 (s, 9H) ppm; <sup>13</sup>C NMR (100 MHz, CD<sub>3</sub>OD, mixture of rotamers)  $\delta$  173.8, 173.0, 157.9, 139.1, 132.5, 130.4, 121.8, 93.5 (d, <sup>1</sup>J<sub>C-F</sub> = 178.4 MHz), 80.8, 60.5, 56.2 (d, <sup>2</sup>J<sub>C-F</sub> = 22.3 MHz), 43.5, 38.9, 37.2 (d, <sup>2</sup>J<sub>C-F</sub> = 21.8 MHz), 36.6, 28.8, 28.7, 26.9, 26.7 ppm; <sup>19</sup>F NMR (376 MHz, CD<sub>3</sub>OD, mixture of rotamers)  $\delta$  -178.8, -179.0 ppm. HRMS (ESI-Orbitrap) *m/z*: [M + Na]<sup>+</sup> Calcd for C<sub>23</sub>H<sub>33</sub>BrFN<sub>3</sub>O<sub>4</sub>Na<sup>+</sup>: 536.1531, 538.1510, found: 536.1536, 538.1513.

**(2*S*,4*R*)-1-((*S*)-2-acetamido-3,3-dimethylbutanoyl)-*N*-(4-bromobenzyl)-4-fluoropyrrolidine-2-carboxamide (11)**

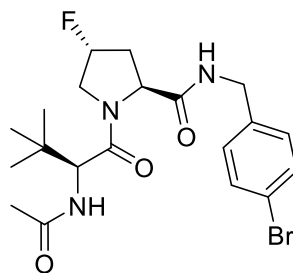

A solution of **10** (150 mg, 0.29 mmol) in TFA/DCM (1/1 mL) was stirred at room temperature for 1 h. The mixture was evaporated under reduced pressure to give the corresponding intermediate further purification. The corresponding intermediate was dissolved in DCM (2 mL), and triethylamine (120  $\mu$ L, 0.88 mmol) was added to the solution. After stirring the mixture for 10 min at room temperature, acetic anhydride (41  $\mu$ L, 0.44 mmol) was added and the reaction was stirred 3 h at room temperature then the solvents were evaporated. The residue was purified by flash

chromatography on silica gel (PE/EA = 1:1) to give the desired product **11**.

White Foam (112 mg, 85%)  $[\alpha]_D^{22} = -22.0$  (*c* 0.25, CHCl<sub>3</sub>), IR (film):  $\nu_{\max}$  1633, 1582, 1535, 1425, 1280, 1120. <sup>1</sup>H NMR (400 MHz, CD<sub>3</sub>OD, mixture of rotamers)  $\delta$  7.52-7.43 (m, 2H), 7.32-7.27 (m, 2H), 5.43-5.25 (m, 1H), 4.60-4.45 (m, 3H), 4.38-4.24 (m, 2H), 3.95-3.78 (m, 1H), 2.59-2.46 (m, 1H), 2.27-2.09 (m, 1H), 2.02 (s, 3H), 1.06 (s, 9H) ppm; <sup>13</sup>C NMR (100 MHz, CD<sub>3</sub>OD, mixture of rotamers)  $\delta$  175.2, 173.8, 173.3, 173.1, 172.5, 172.3, 139.2, 138.9, 132.7, 132.5, 131.0, 130.5, 122.1, 121.8, 93.5 (d, <sup>1</sup>J<sub>C-F</sub> = 176.7 MHz), 91.9 (d, <sup>1</sup>J<sub>C-F</sub> = 175.1 MHz), 60.5, 60.4, 59.5, 58.5, 56.3 (d, <sup>2</sup>J<sub>C-F</sub> = 22.5 MHz), 54.7 (d, <sup>2</sup>J<sub>C-F</sub> = 23.6 MHz), 44.1, 43.5, 39.7 (d, <sup>2</sup>J<sub>C-F</sub> = 22.3 MHz), 38.9, 37.5, 37.3 (d, <sup>2</sup>J<sub>C-F</sub> = 21.8 MHz), 36.2, 27.0, 26.9, 22.6, 22.2 ppm; <sup>19</sup>F NMR (376 MHz, CD<sub>3</sub>OD, mixture of rotamers)  $\delta$  -178.7, -178.8 ppm. HRMS (ESI-Orbitrap) *m/z*: [M + Na]<sup>+</sup> Calcd for C<sub>20</sub>H<sub>27</sub>BrFN<sub>3</sub>O<sub>3</sub>Na<sup>+</sup>: 478.1112, 480.1092, found: 478.1112, 480.1091.

**(2*S*,4*R*)-1-((*S*)-2-acetamido-3,3-dimethylbutanoyl)-4-fluoro-*N*-(4-(4-methylthiazol-5-yl)benzyl)pyrrolidine-2-carboxamide (12)**

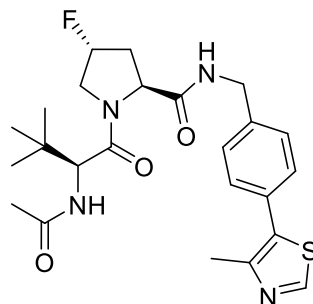

To a solution of **11** (100 mg, 0.22 mmol) and Pd(OAc)<sub>2</sub> (1 mg, 2 mol %) in DMAc (2 mL) were added KOAc (43 mg, 0.44 mmol) and 4-methylthiazole (44 mg, 0.44 mmol). The resulting mixture was heated to 150 °C and stirred for 12 h. The mixture was diluted with water and extracted with DCM (3×10 mL). The combined organic phases were dried over MgSO<sub>4</sub> and evaporated under reduced pressure. The residue was

purified by flash chromatography on silica gel (PE/EA = 1:1) to give the desired product **12**.

White Foam (70 mg, 67%)  $[\alpha]_D^{22} = -8.4$  (*c* 0.25, CHCl<sub>3</sub>), IR (film):  $\nu_{\max}$  1635, 1544, 1425, 1370, 1283, 1118, 769. <sup>1</sup>H NMR (400 MHz, CD<sub>3</sub>OD, mixture of rotamers)  $\delta$  8.89 (s, 1H), 7.54-7.40 (m, 4H), 5.45-5.28 (m, 1H), 4.62-4.55 (m, 3H), 4.40-4.28 (m, 2H), 3.96-3.81 (m, 1H), 2.65-2.52 (m, 1H), 2.49 (s, 3H), 2.29-2.12 (m, 1H), 2.02 (s, 3H), 1.07 (s, 9H) ppm; <sup>13</sup>C NMR (100 MHz, CD<sub>3</sub>OD, mixture of rotamers)  $\delta$  173.9, 173.4, 172.5, 152.8, 149.1, 140.2, 131.6, 130.4, 129.0, 93.5 (d, <sup>1</sup>J<sub>C-F</sub> = 176.7 MHz), 60.5, 59.6, 56.3 (d, <sup>2</sup>J<sub>C-F</sub> = 22.4 MHz), 43.8, 37.3 (d, <sup>2</sup>J<sub>C-F</sub> = 20.0 MHz), 36.2, 27.0, 22.2, 15.8 ppm; <sup>19</sup>F NMR (376 MHz, CD<sub>3</sub>OD)  $\delta$  -178.8 ppm. HRMS (ESI-Orbitrap) *m/z*: [M + Na]<sup>+</sup> Calcd for C<sub>24</sub>H<sub>31</sub>FN<sub>4</sub>O<sub>3</sub>SNa<sup>+</sup>: 497.1993, found: 497.1995.

## References:

- 1 C.-M. Si, Z.-Y. Mao, Y.-W. Liu, Z.-T. Du, B.-G. Wei and G.-Q. Lin, *Org. Chem. Front.*, 2015, **2**, 1485-1499.
- 2 (a) Y. X. Zhang, L. Y. Chen, J. T. Sun, C. M. Si and B. G. Wei, *J. Org. Chem.*, 2020, **85**, 12603-12613; (b) X.-M. Wang, Y.-W. Liu, Q.-E. Wang, Z. Zhou, C.-M. Si and B.-G. Wei, *Tetrahedron*, 2019, **75**, 260-268; (c) W. Huang, J.-Y. Ma, M. Yuan, L.-F. Xu and B.-G. Wei, *Tetrahedron*, 2011, **67**, 7829-7837.
- 3 A. Greb, J.-S. Poh, S. Greed, C. Battilocchio, P. Pasau, D. C. Blakemore and S. V. Ley, *Angew. Chem. Int. Ed.*, 2017, **56**, 16602-16605.



4.117  
4.107  
4.096  
4.087  
3.638  
3.628  
3.509  
3.496  
3.418  
3.410  
3.392  
1.914  
1.907  
1.892  
1.889  
1.880  
1.876  
1.850  
1.817  
1.775  
1.746  
1.457  
1.423  
1.379  
1.347  
1.341  
1.314  
1.309  
1.291  
1.270  
1.264  
1.262  
1.242  
1.234  
1.211  
1.204  
1.181

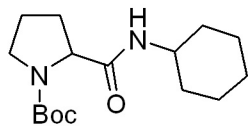

(<sup>1</sup>H NMR, 400 MHz, CD<sub>3</sub>OD)

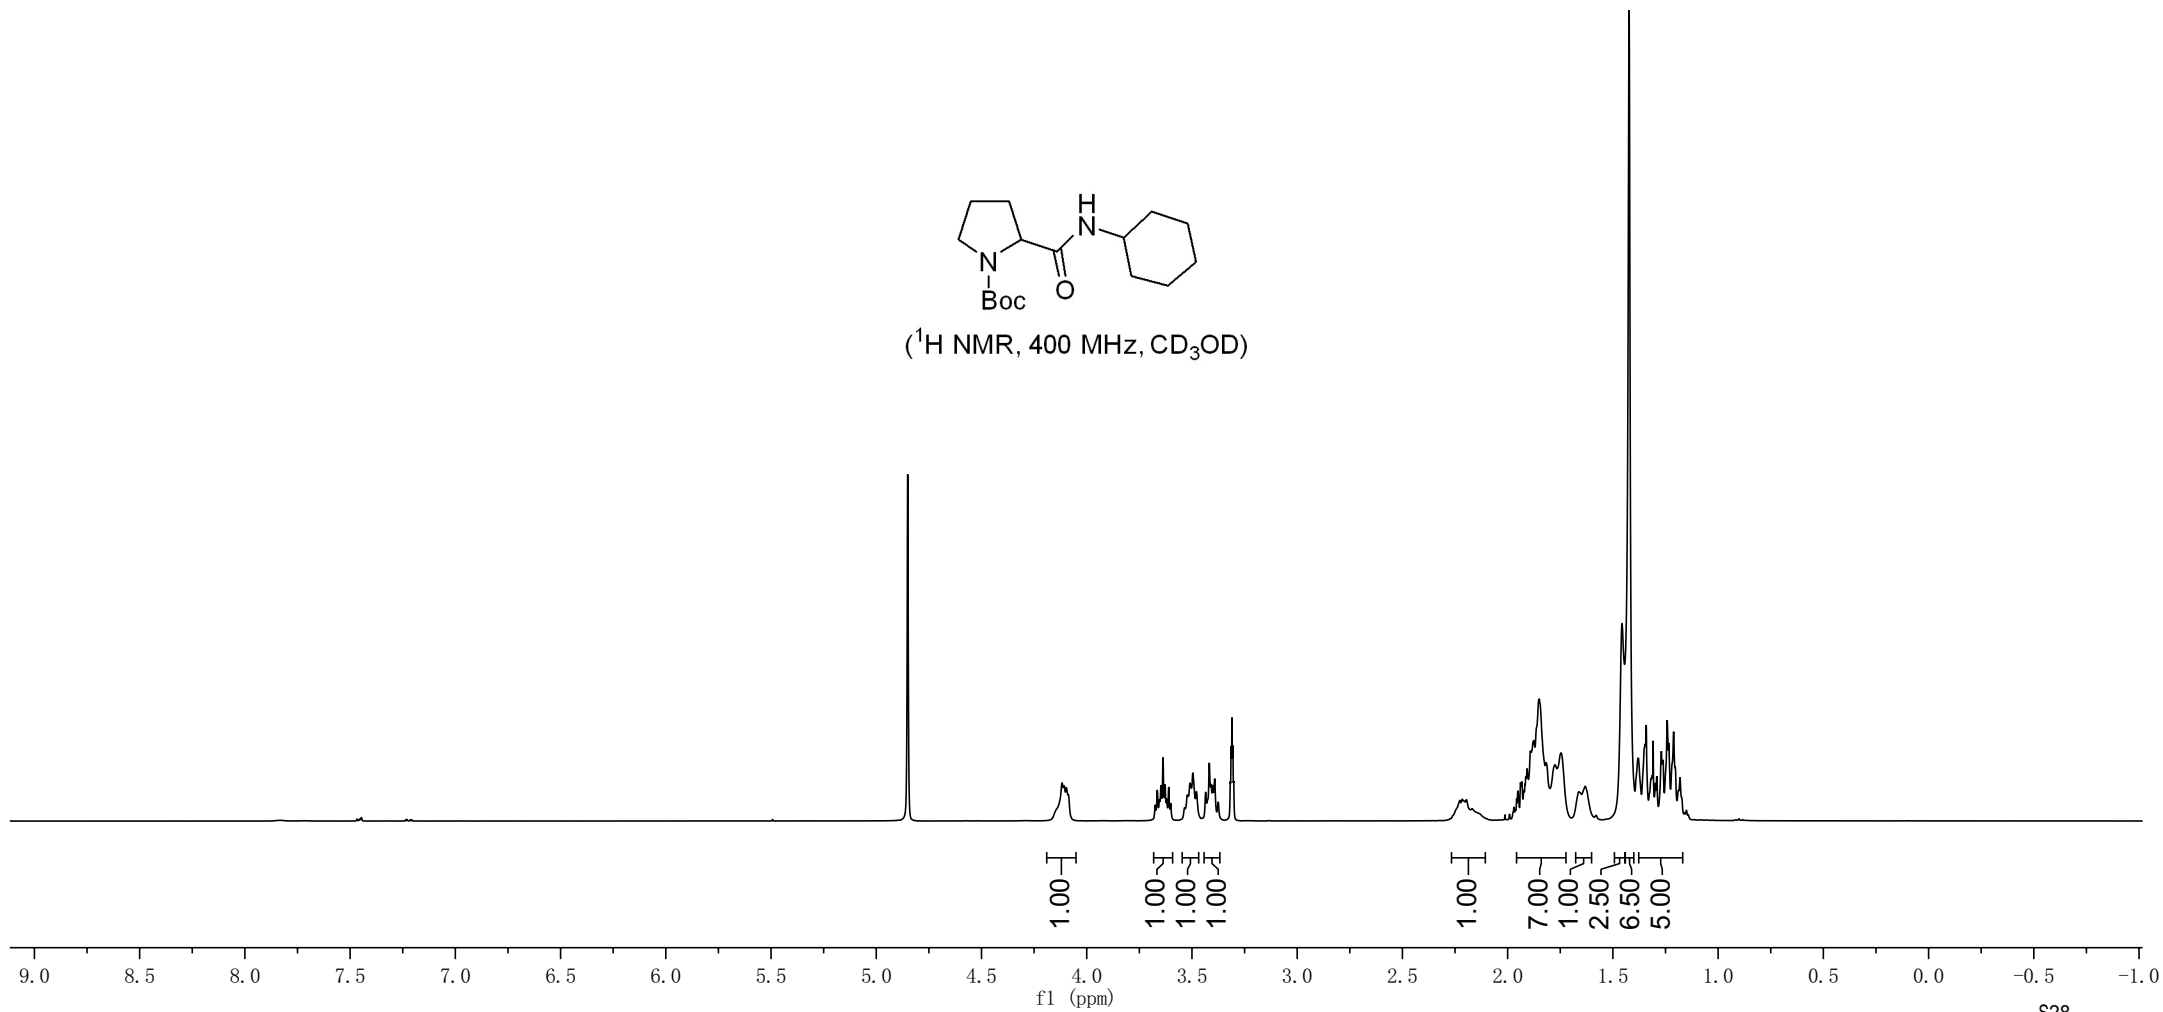

174.710  
174.271

156.380  
156.078

81.334  
81.187

61.741  
61.477

49.819  
47.989

33.937  
33.820  
32.751  
31.574

28.734  
26.649  
26.206  
25.365  
24.684

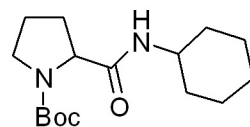

(<sup>13</sup>C NMR, 100 MHz, CD<sub>3</sub>OD)

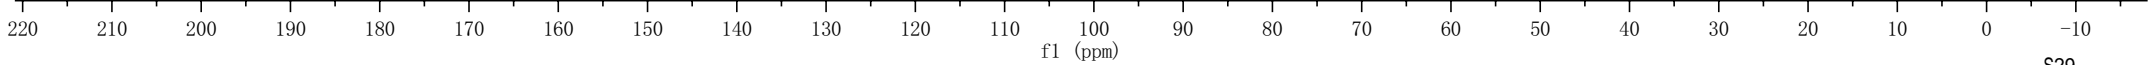

4.864  
4.849  
4.833  
4.802

4.161  
4.141

3.645  
3.636  
3.626  
3.609  
3.529  
3.464  
3.450  
3.440

1.953  
1.927  
1.920  
1.910  
1.904  
1.891  
1.879  
1.870  
1.846  
1.810  
1.802  
1.773  
1.743  
1.627  
1.373  
1.343  
1.310  
1.302  
1.295  
1.265  
1.245  
1.236  
1.227  
1.213  
1.194  
1.181

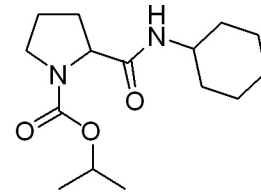

(<sup>1</sup>H NMR, 400 MHz, CD<sub>3</sub>OD)

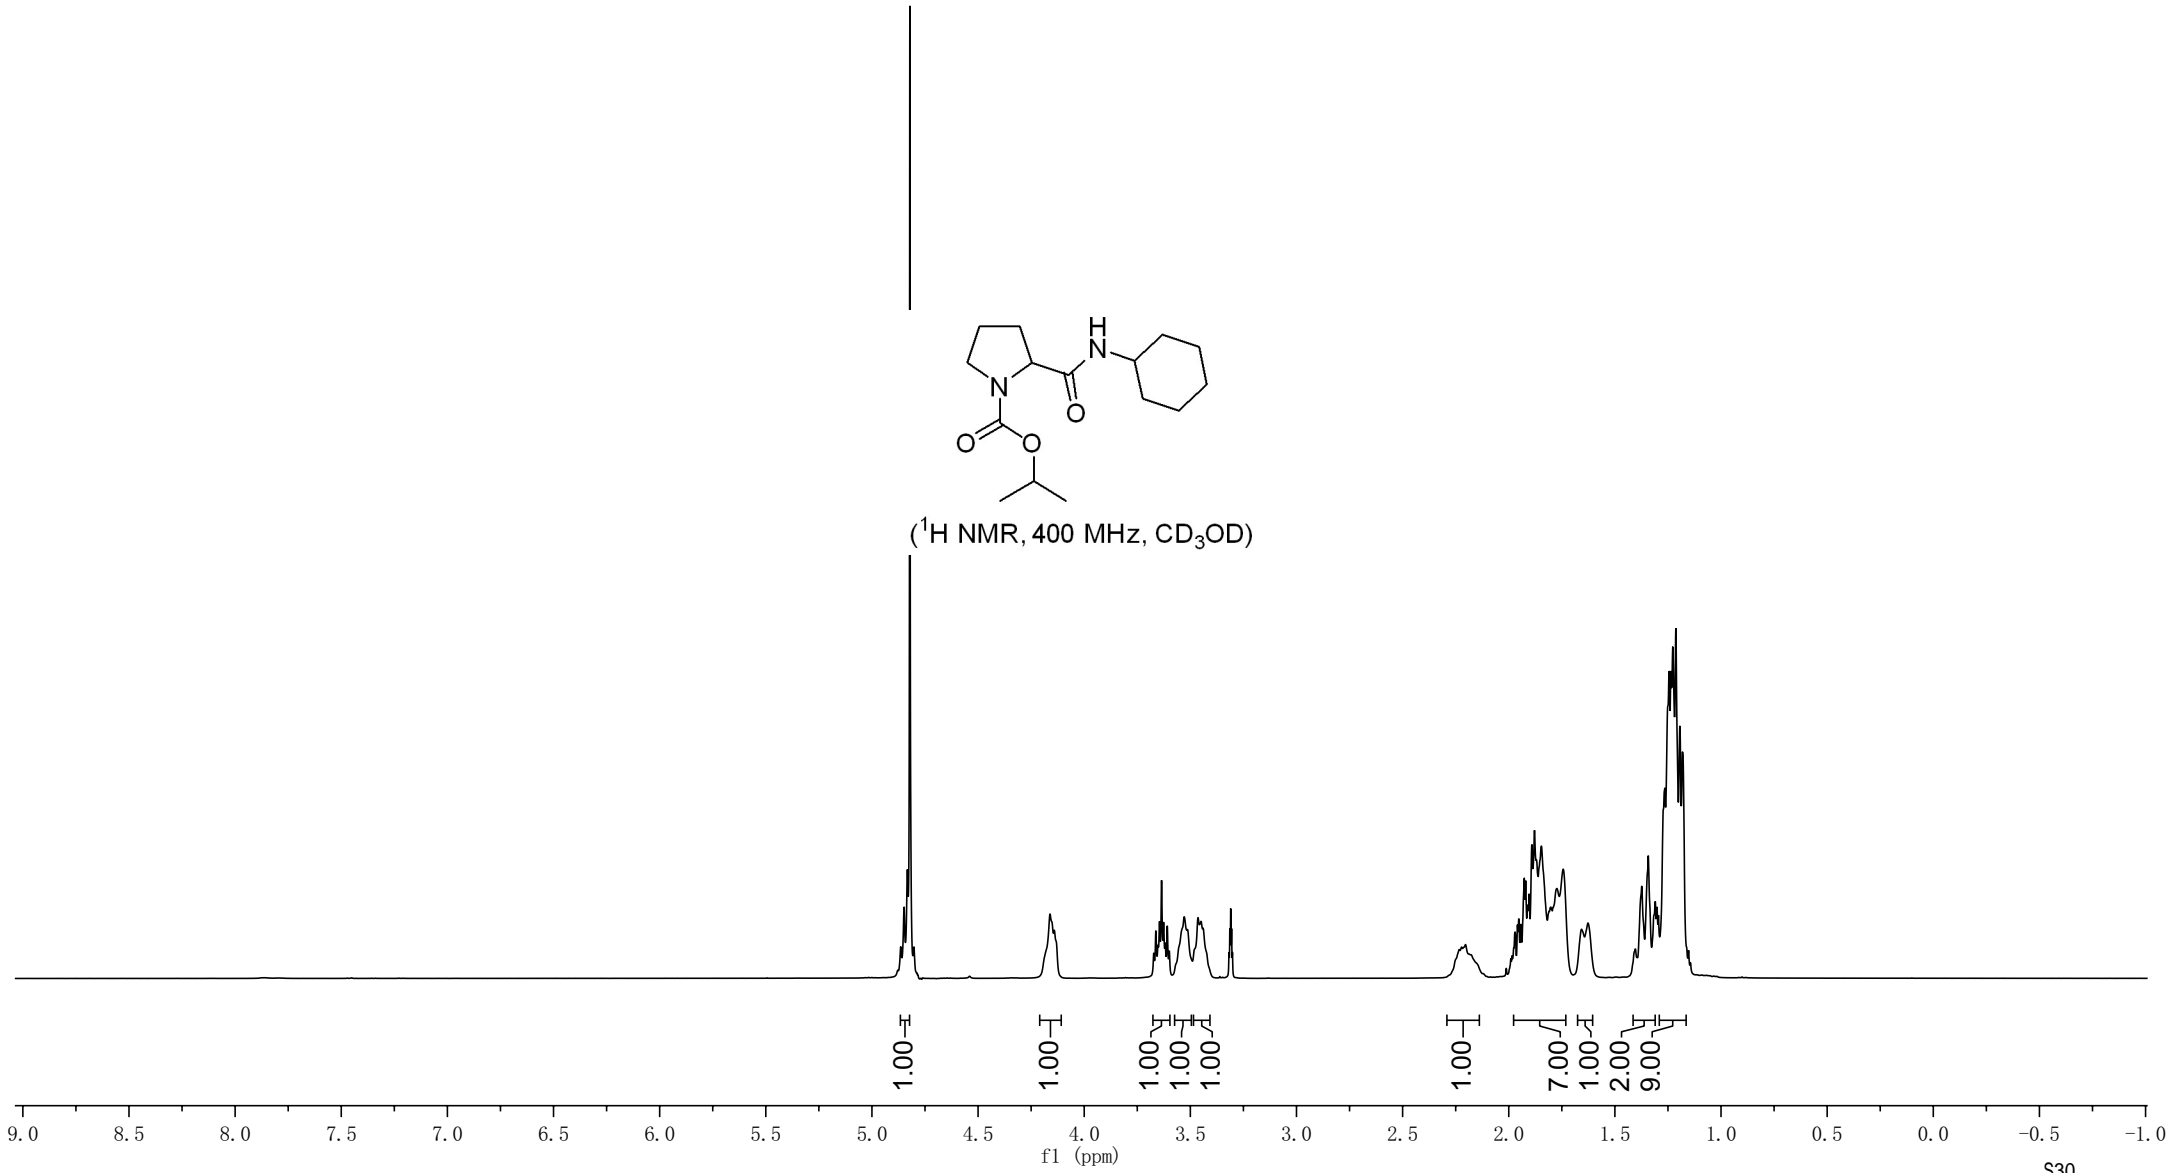

174.484  
174.131

156.771  
156.398

70.212

61.750  
61.495

49.798  
48.305

48.027

33.923  
33.709

32.723

31.671

26.665  
26.184

25.383  
24.707  
22.581  
22.491

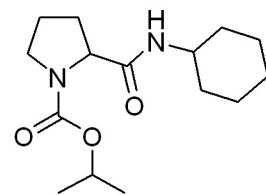

(<sup>13</sup>C NMR, 100 MHz, CD<sub>3</sub>OD)

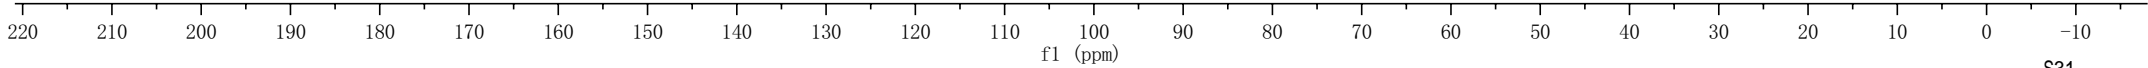

4.199  
4.189  
4.178  
4.168  
4.028  
4.014  
3.998  
3.981  
3.964  
3.949  
3.658  
3.648  
3.641  
3.631  
3.622  
3.614  
3.604  
3.578  
3.564  
3.559  
3.552  
3.545  
3.539  
3.533  
3.520  
3.495  
3.477  
3.469  
3.460  
3.452  
3.435  
1.968  
1.944  
1.928  
1.917  
1.911  
1.899  
1.886  
1.877  
1.837  
1.814  
1.806  
1.774  
1.767  
1.742  
1.656  
1.635  
1.619  
1.601  
1.584  
1.401  
1.378  
1.371  
1.340  
1.308  
1.297  
1.290  
1.267  
1.241  
1.233  
1.210  
1.189  
1.180  
1.172  
0.984  
0.966  
0.950  
0.932  
0.914

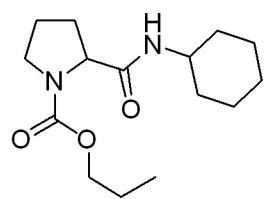

(<sup>1</sup>H NMR, 400 MHz, CD<sub>3</sub>OD)

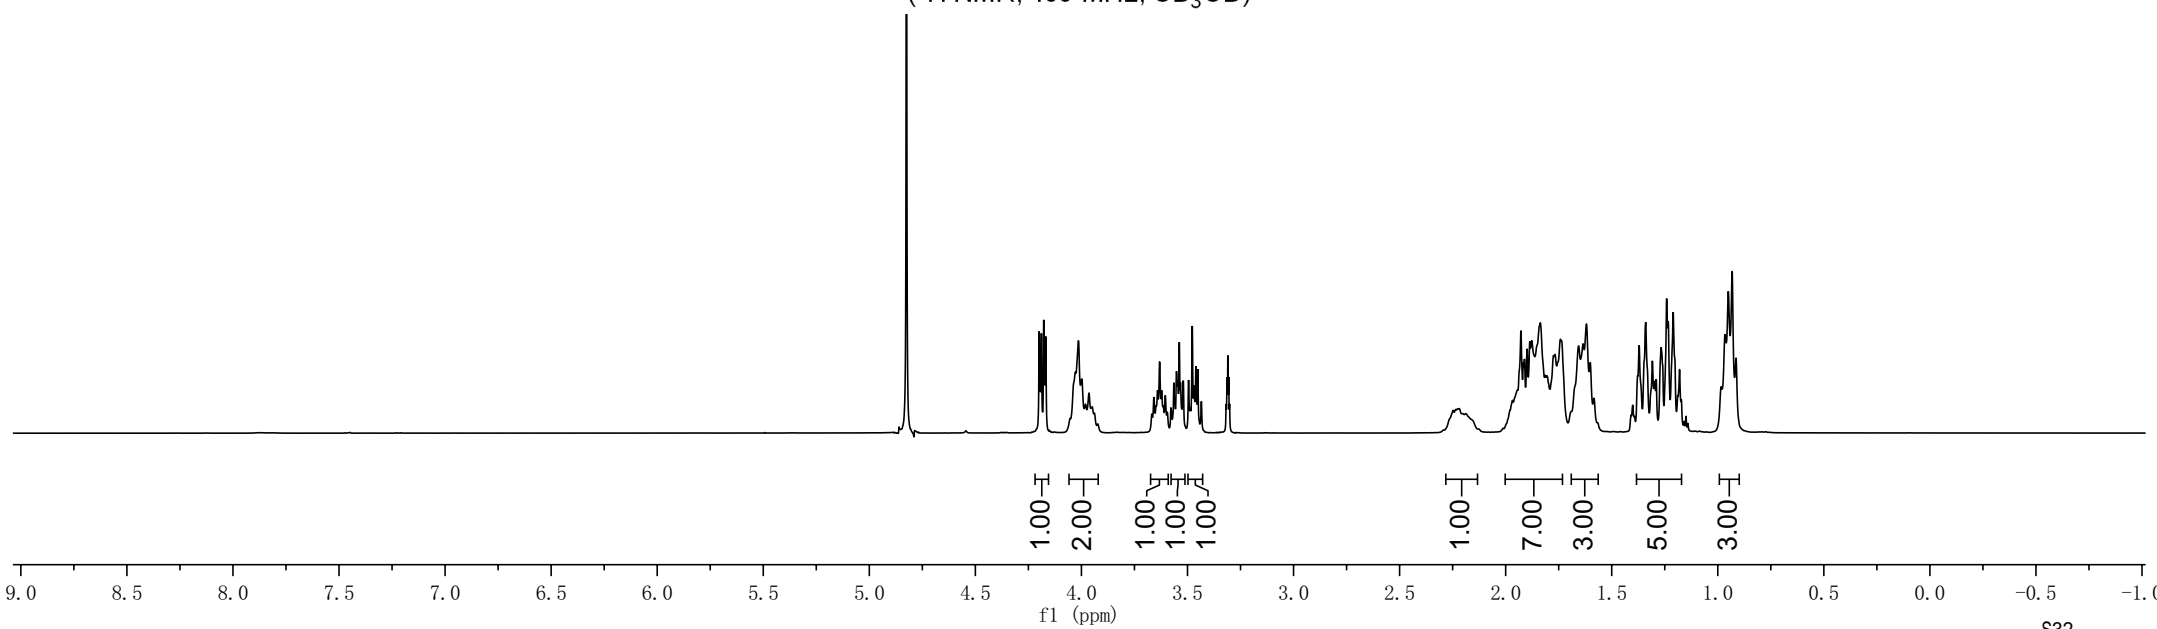

174.408  
174.116

157.166  
156.875

68.225  
61.817  
61.490

49.676  
48.052

33.778  
33.691  
32.821  
31.692

26.660  
26.173  
25.388  
24.648

23.464  
10.861  
10.711

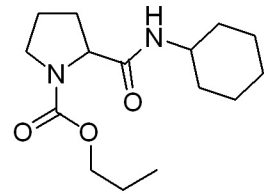

(<sup>13</sup>C NMR, 100 MHz, CD<sub>3</sub>OD)

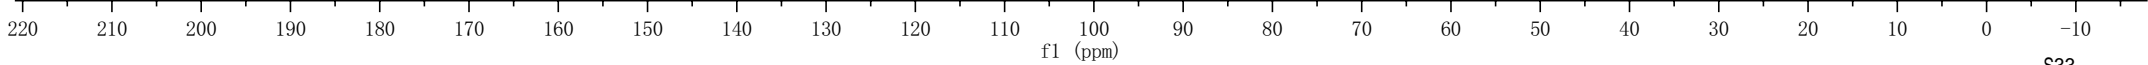

4.205  
4.194  
4.185  
3.881  
3.864  
3.856  
3.840  
3.792  
3.776  
3.767  
3.654  
3.627  
3.600  
3.586  
3.572  
3.567  
3.559  
3.546  
3.541  
3.528  
3.500  
3.493  
3.483  
3.475  
3.465  
3.457  
3.440  
2.258  
2.237  
1.965  
1.924  
1.895  
1.883  
1.869  
1.851  
1.838  
1.819  
1.811  
1.774  
1.765  
1.753  
1.742  
1.734  
1.655  
1.623  
1.399  
1.377  
1.369  
1.361  
1.345  
1.338  
1.314  
1.306  
1.297  
1.294  
1.288  
1.266  
1.259  
1.238  
1.230  
1.209  
1.201  
1.187  
1.179  
1.170  
0.965  
0.949  
0.929  
0.913

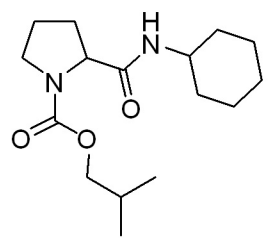

(<sup>1</sup>H NMR, 400 MHz, CD<sub>3</sub>OD)

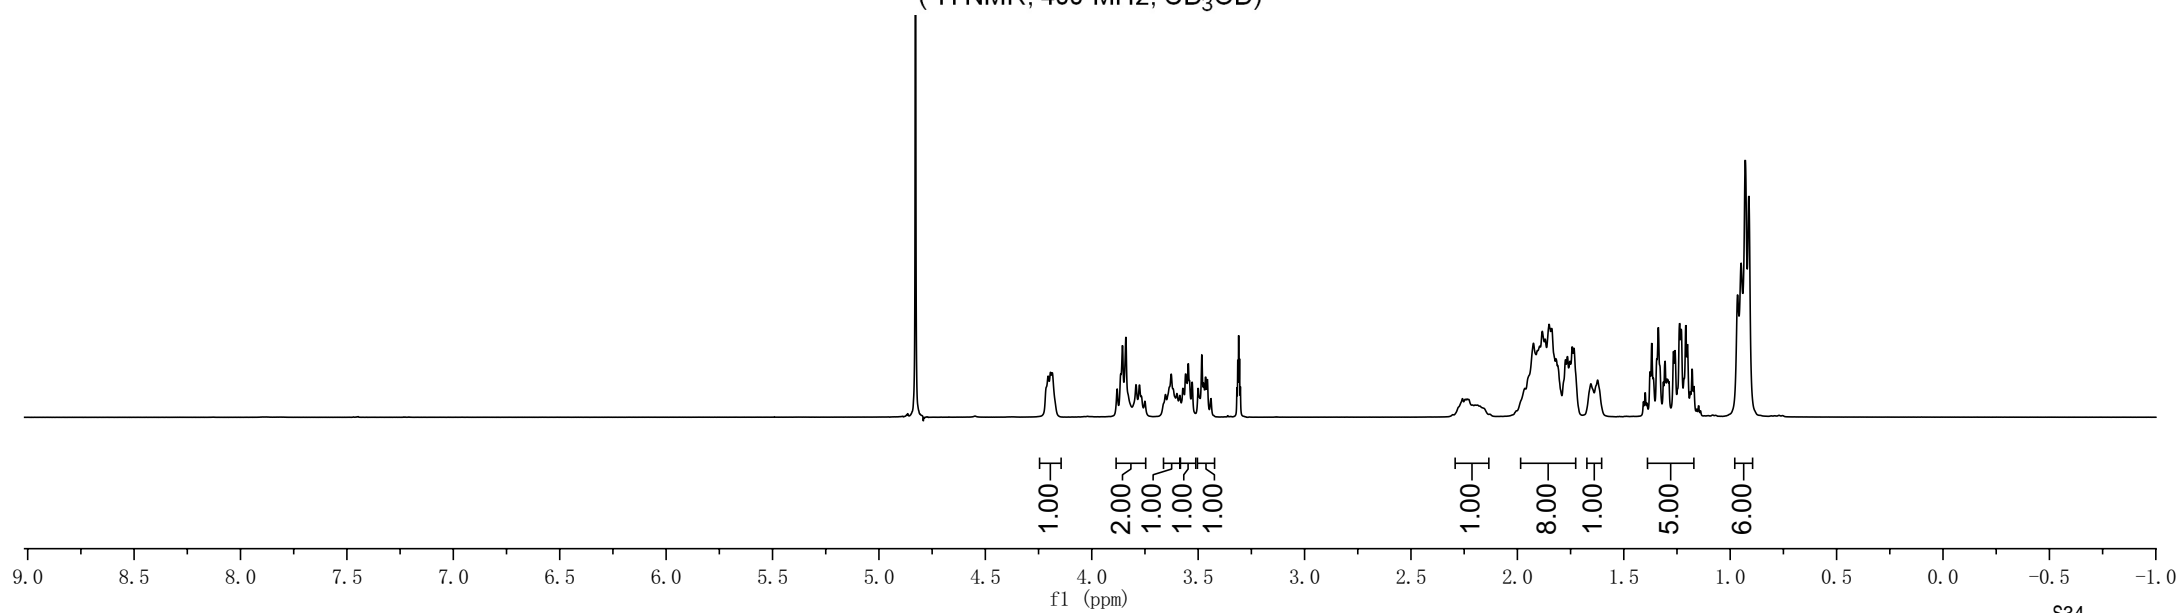

174.345  
174.039

157.126  
156.819

72.710

61.777  
61.408

49.806  
48.422

33.710  
32.877  
31.644  
29.270  
26.623  
26.125  
25.344  
24.569  
19.420

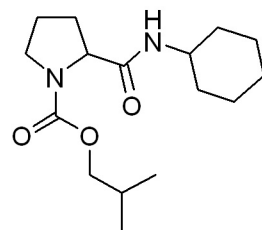

(<sup>13</sup>C NMR, 100 MHz, CD<sub>3</sub>OD)

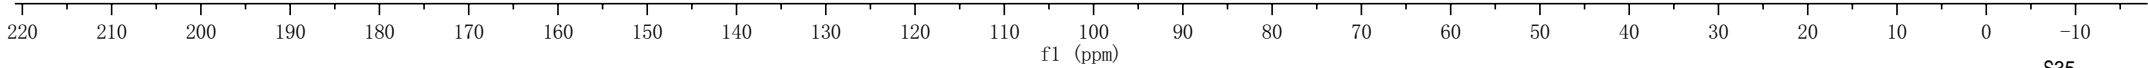



7.338  
7.316  
7.306  
7.295

5.178  
5.147  
5.089  
— 4.682

4.036  
4.004  
— 3.633  
3.242  
3.234  
3.210  
3.202  
3.178  
3.170

— 2.095  
1.806  
1.778  
1.747  
1.714  
1.684  
1.642  
1.619  
1.611  
1.431  
1.410  
1.405  
1.387  
1.382  
1.357  
1.325  
1.295  
1.217  
1.210  
1.186  
1.163  
1.156

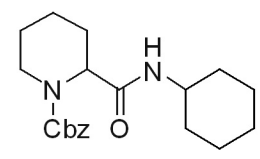

(<sup>1</sup>H NMR, 400 MHz, CD<sub>3</sub>OD)

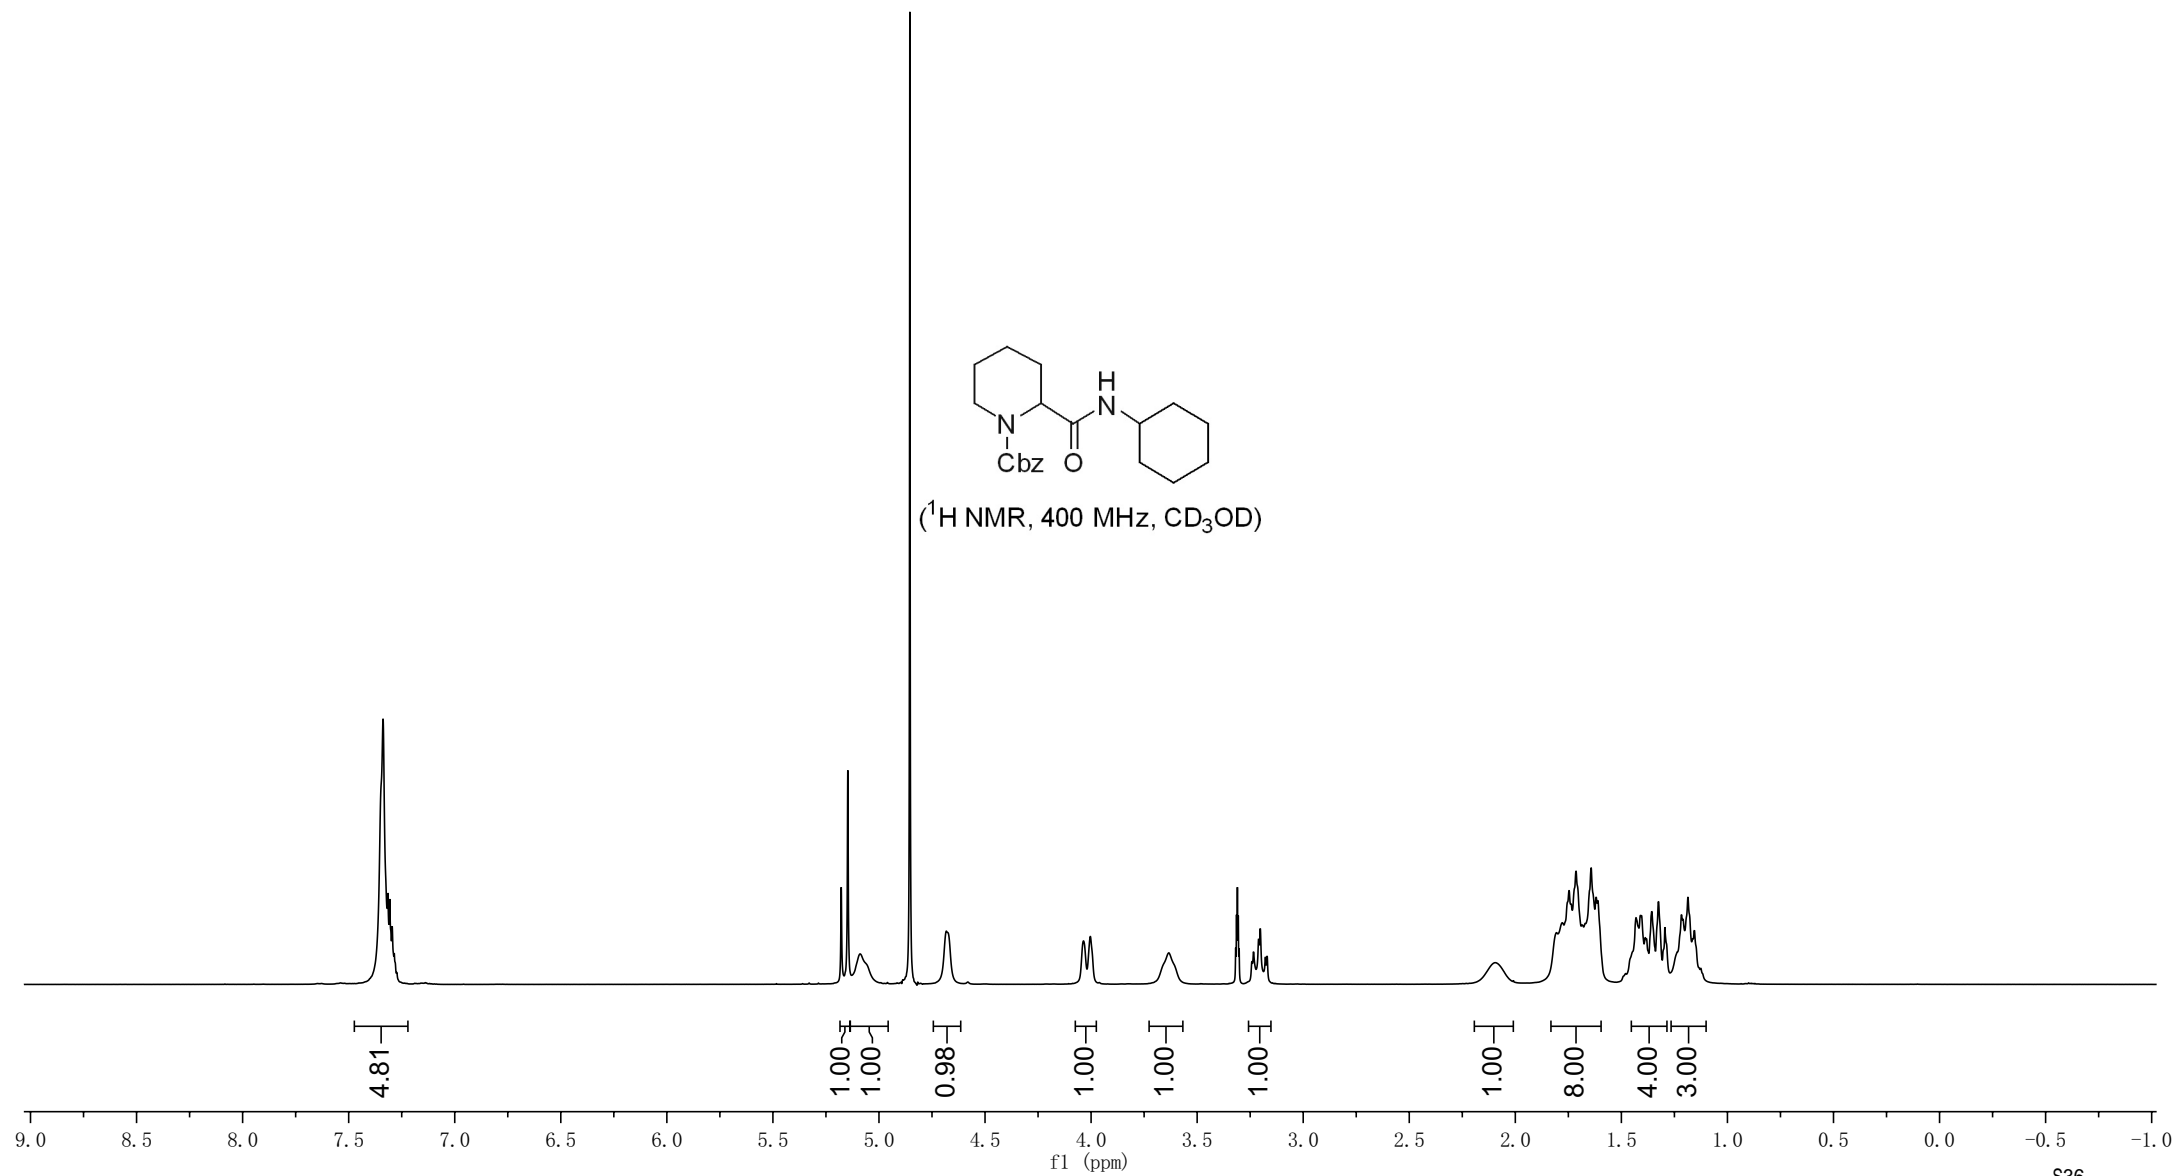

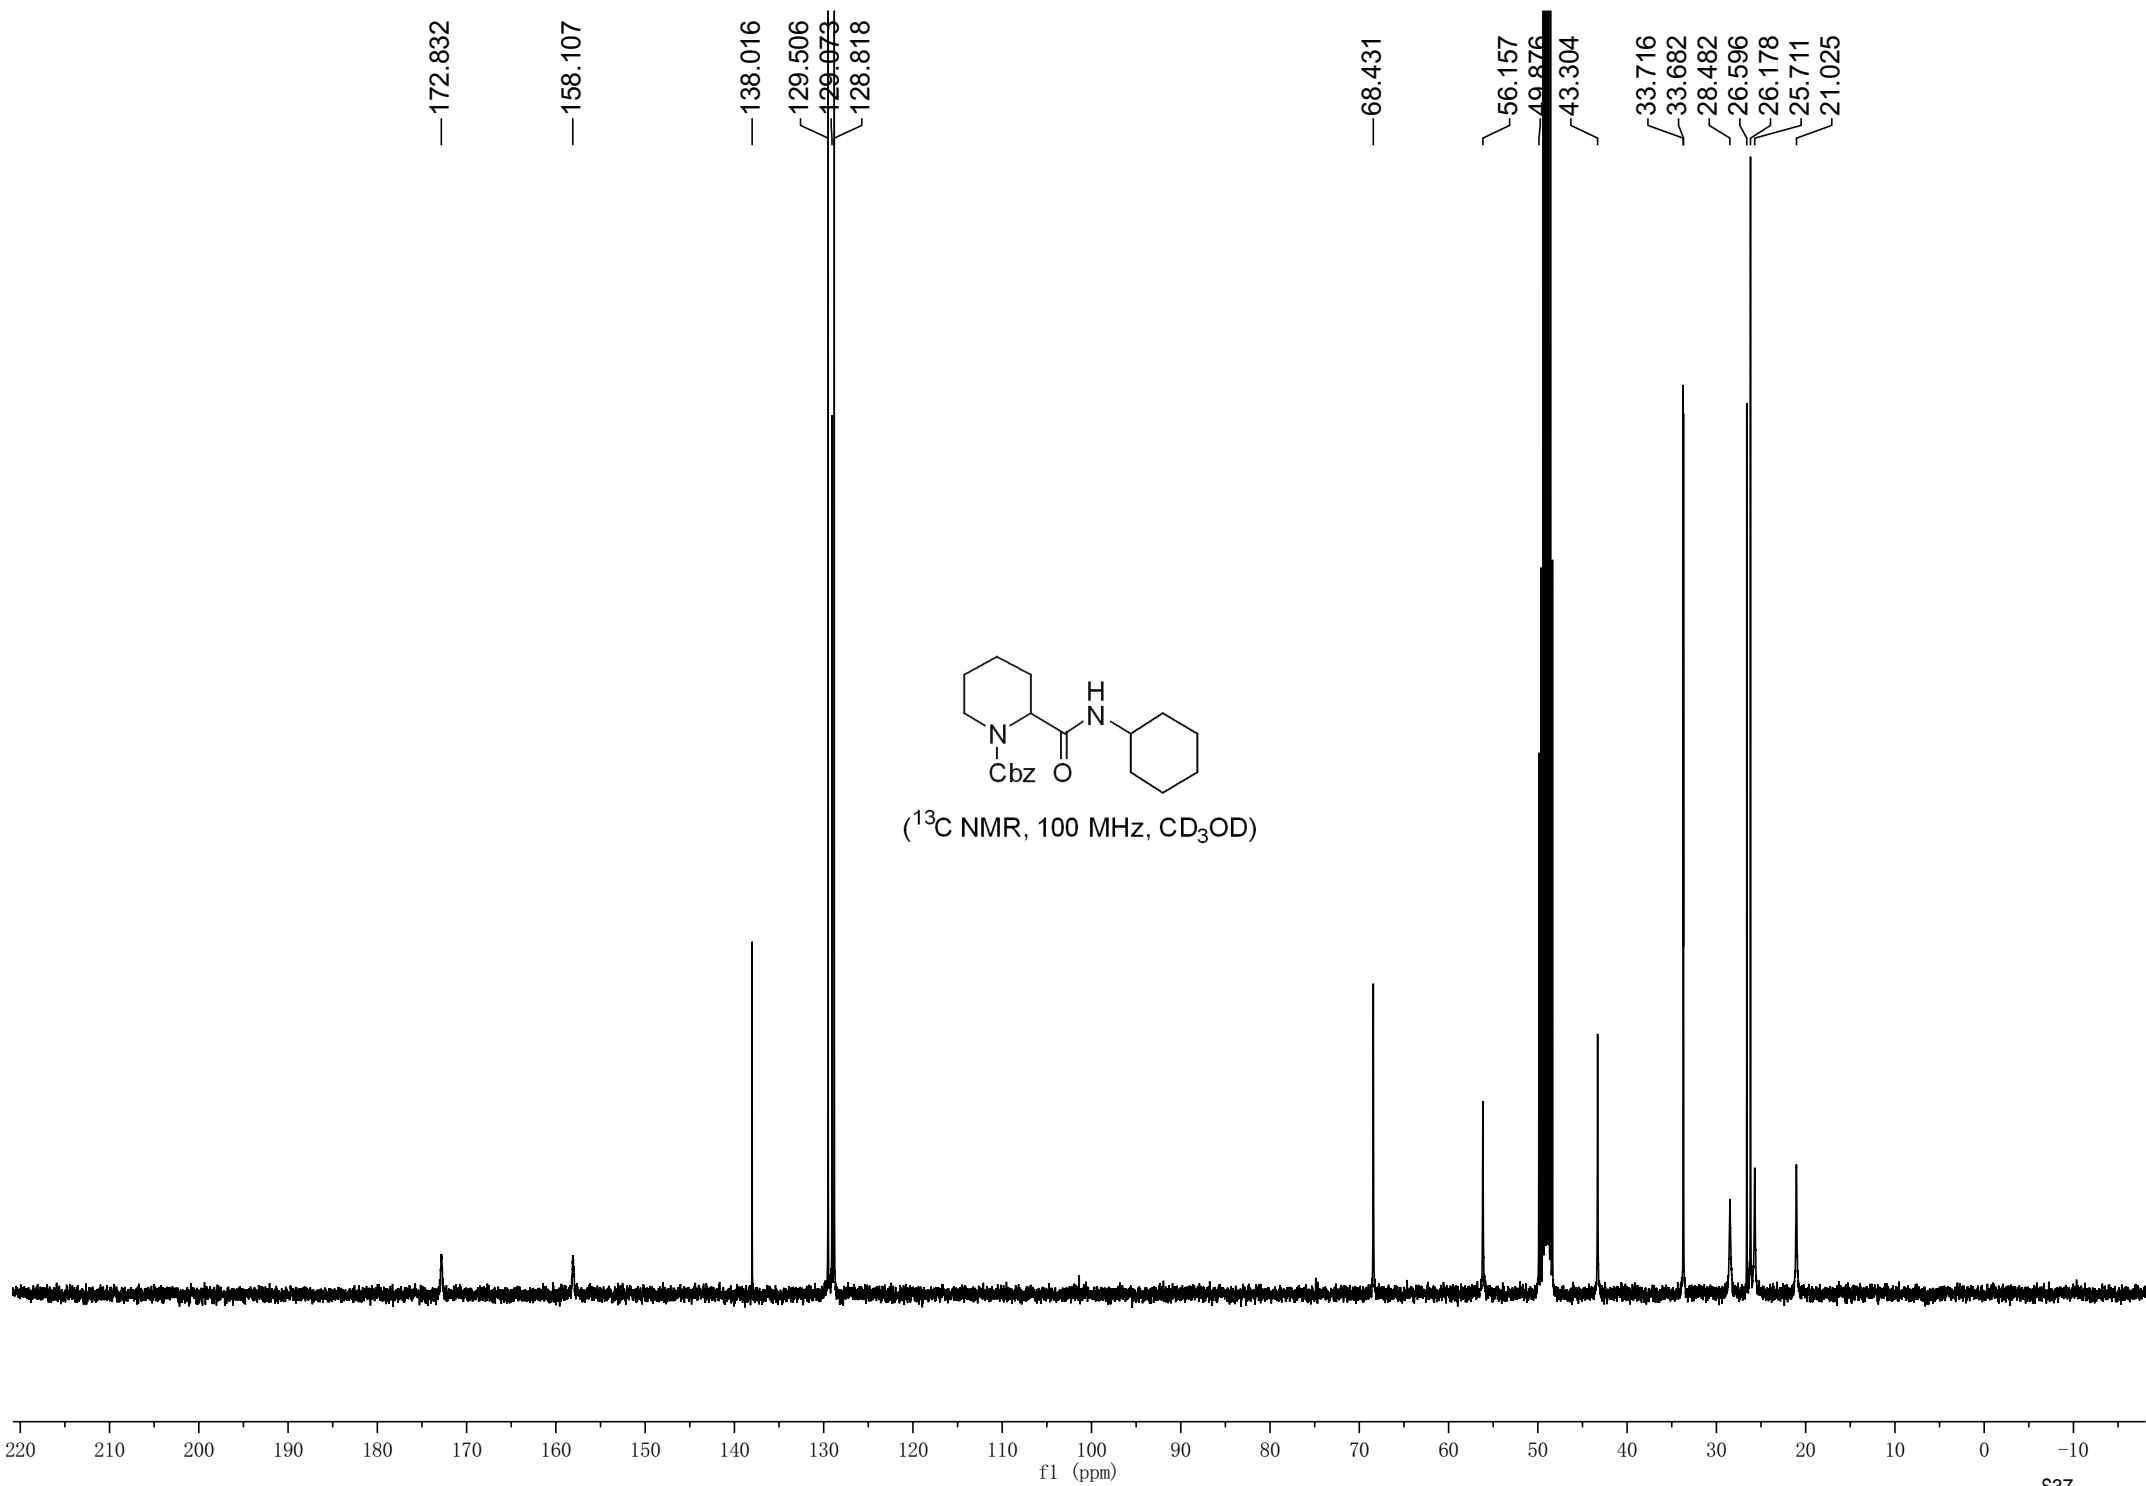

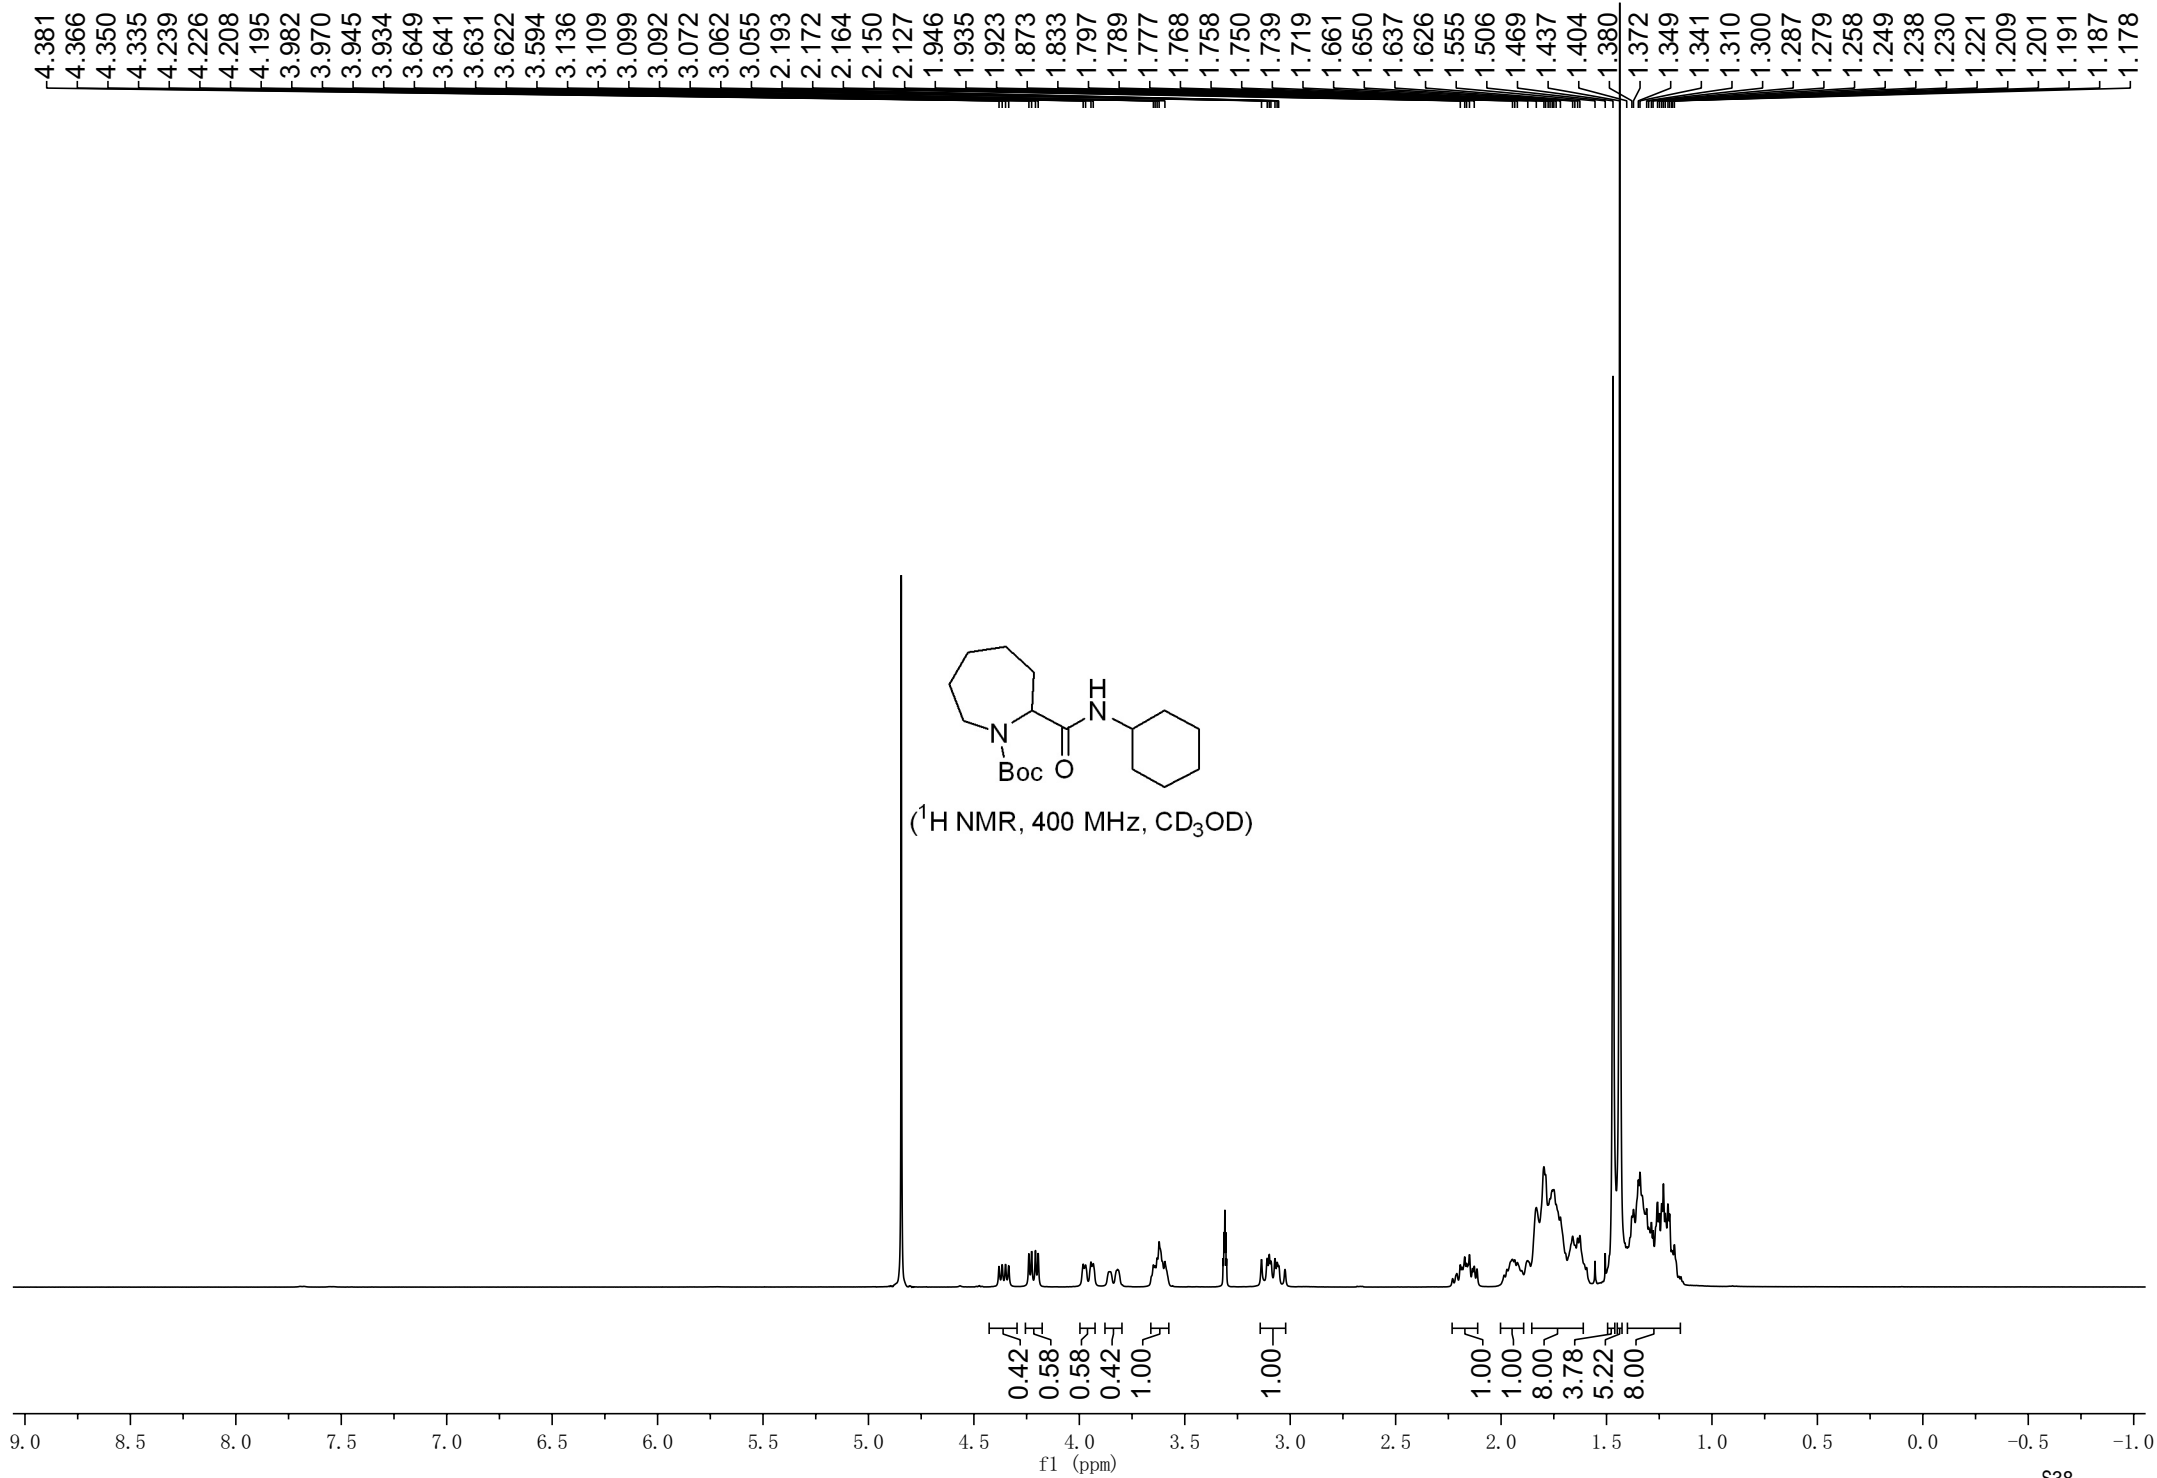

174.802  
174.263

157.811  
157.357

81.459  
81.243

62.404  
60.520

49.639  
49.553

45.191  
44.776

33.990  
33.773

33.658  
33.538

32.764  
32.165

31.320  
30.946

30.385  
30.265

28.739  
27.823

26.935  
26.618  
26.163  
26.000

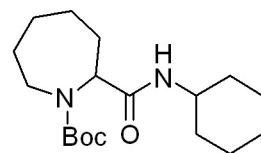

(<sup>13</sup>C NMR, 100 MHz, CD<sub>3</sub>OD)

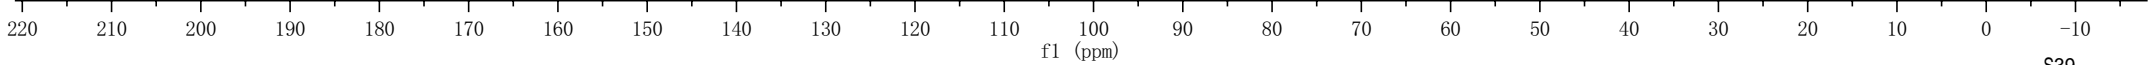

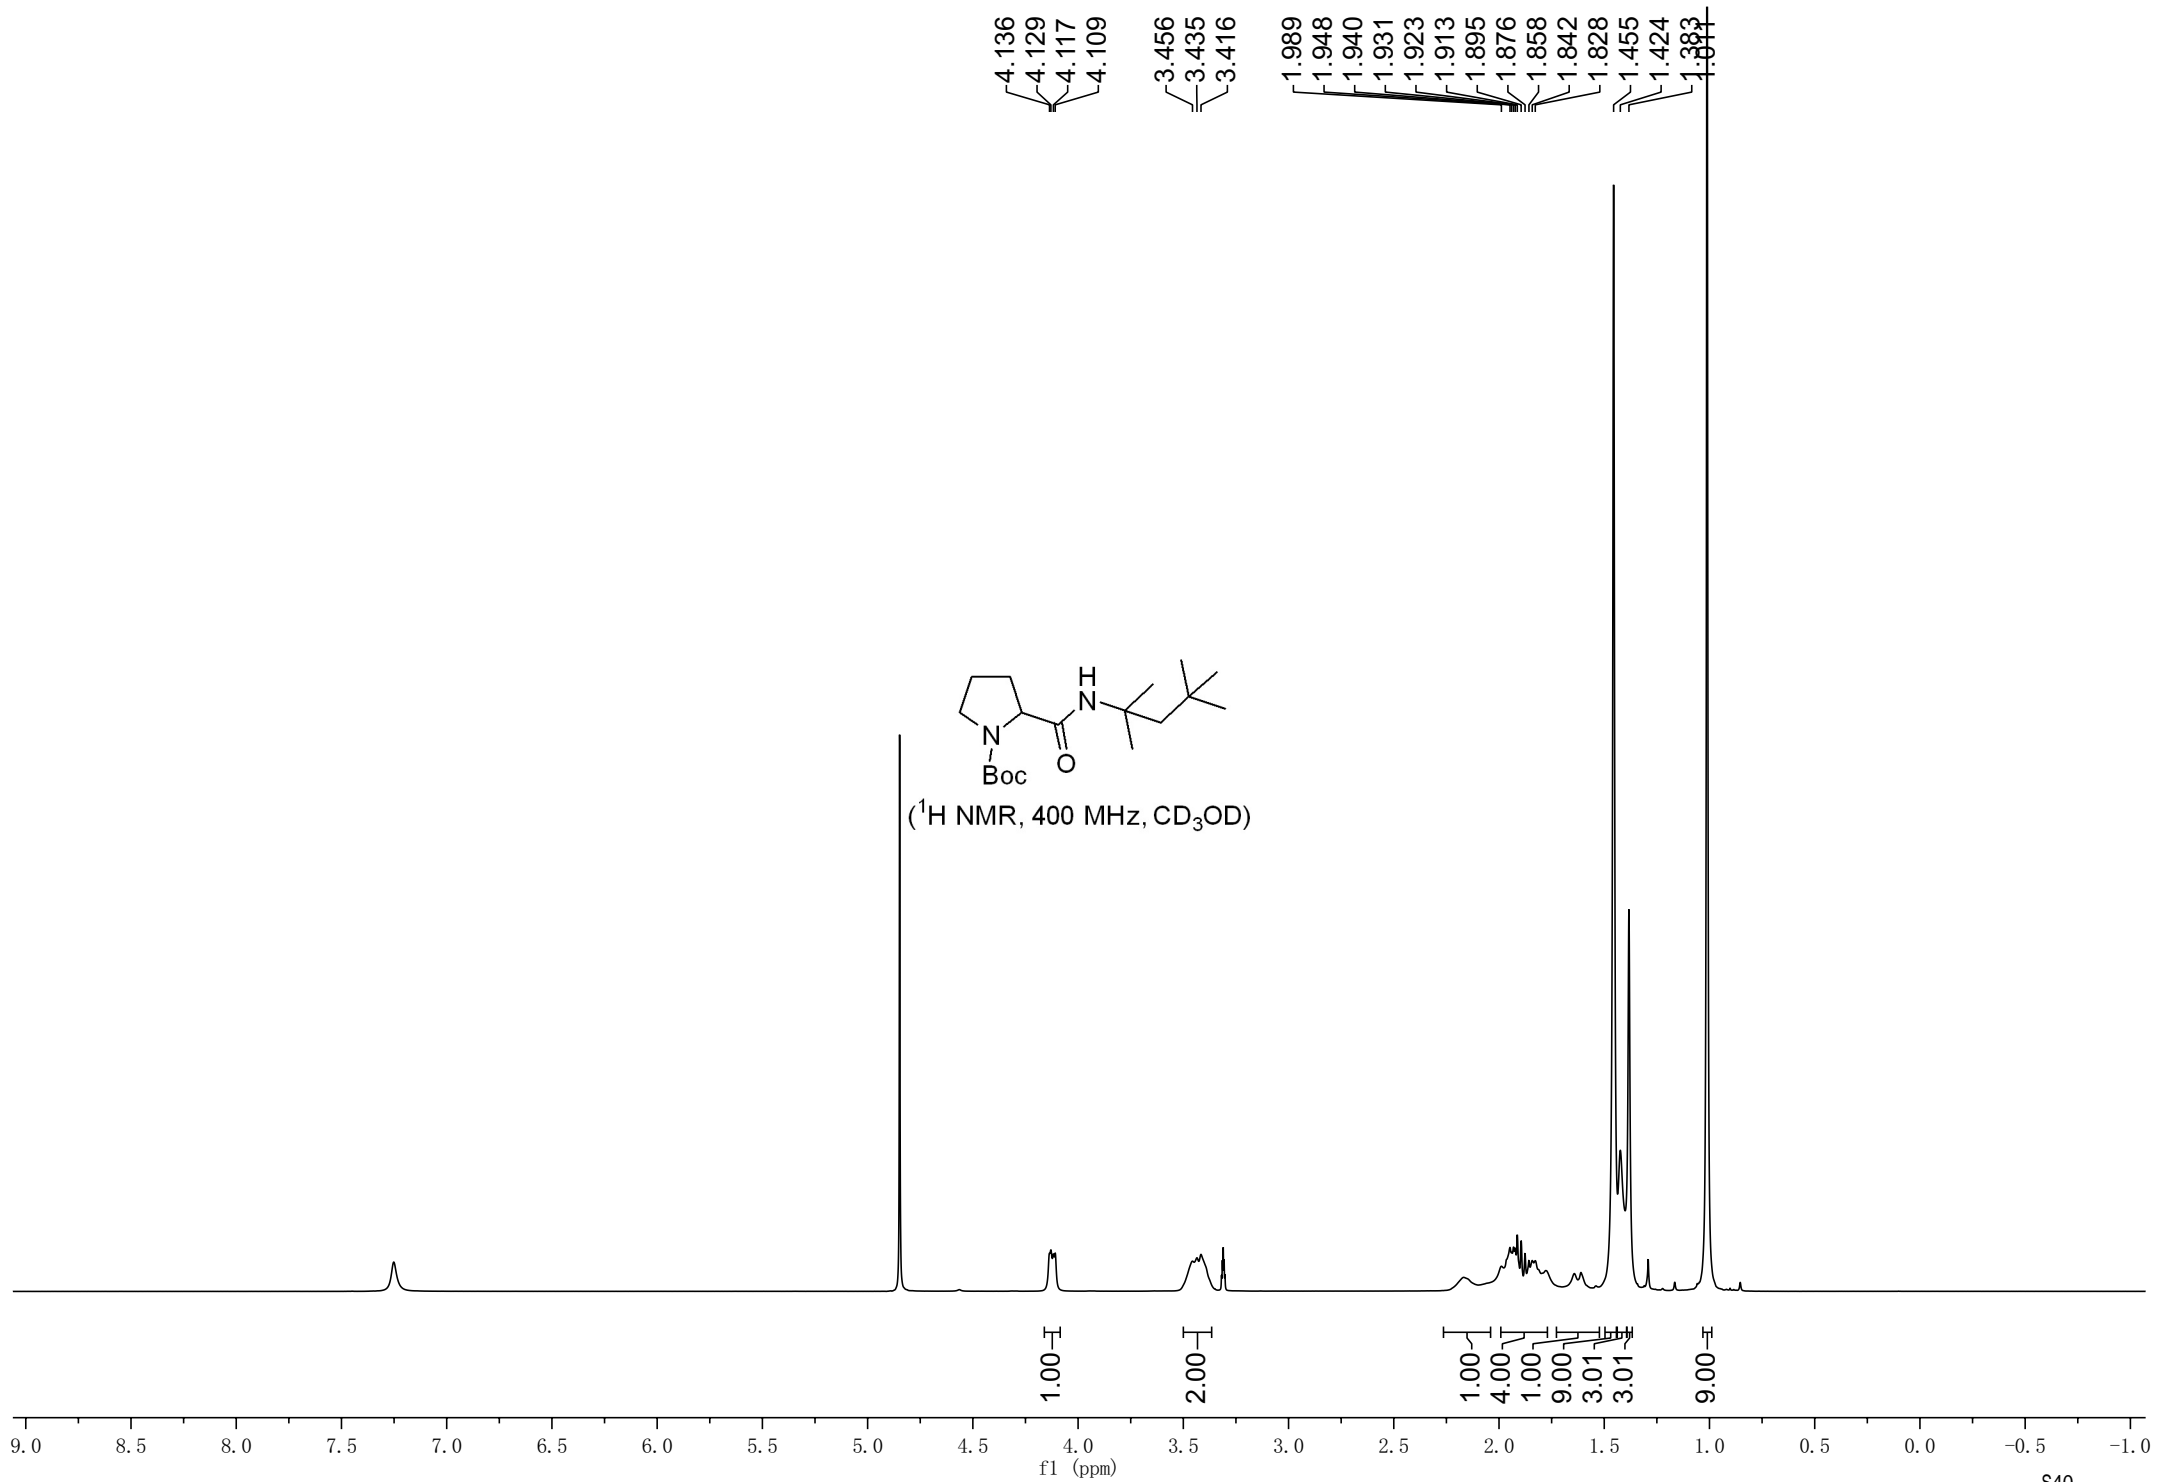

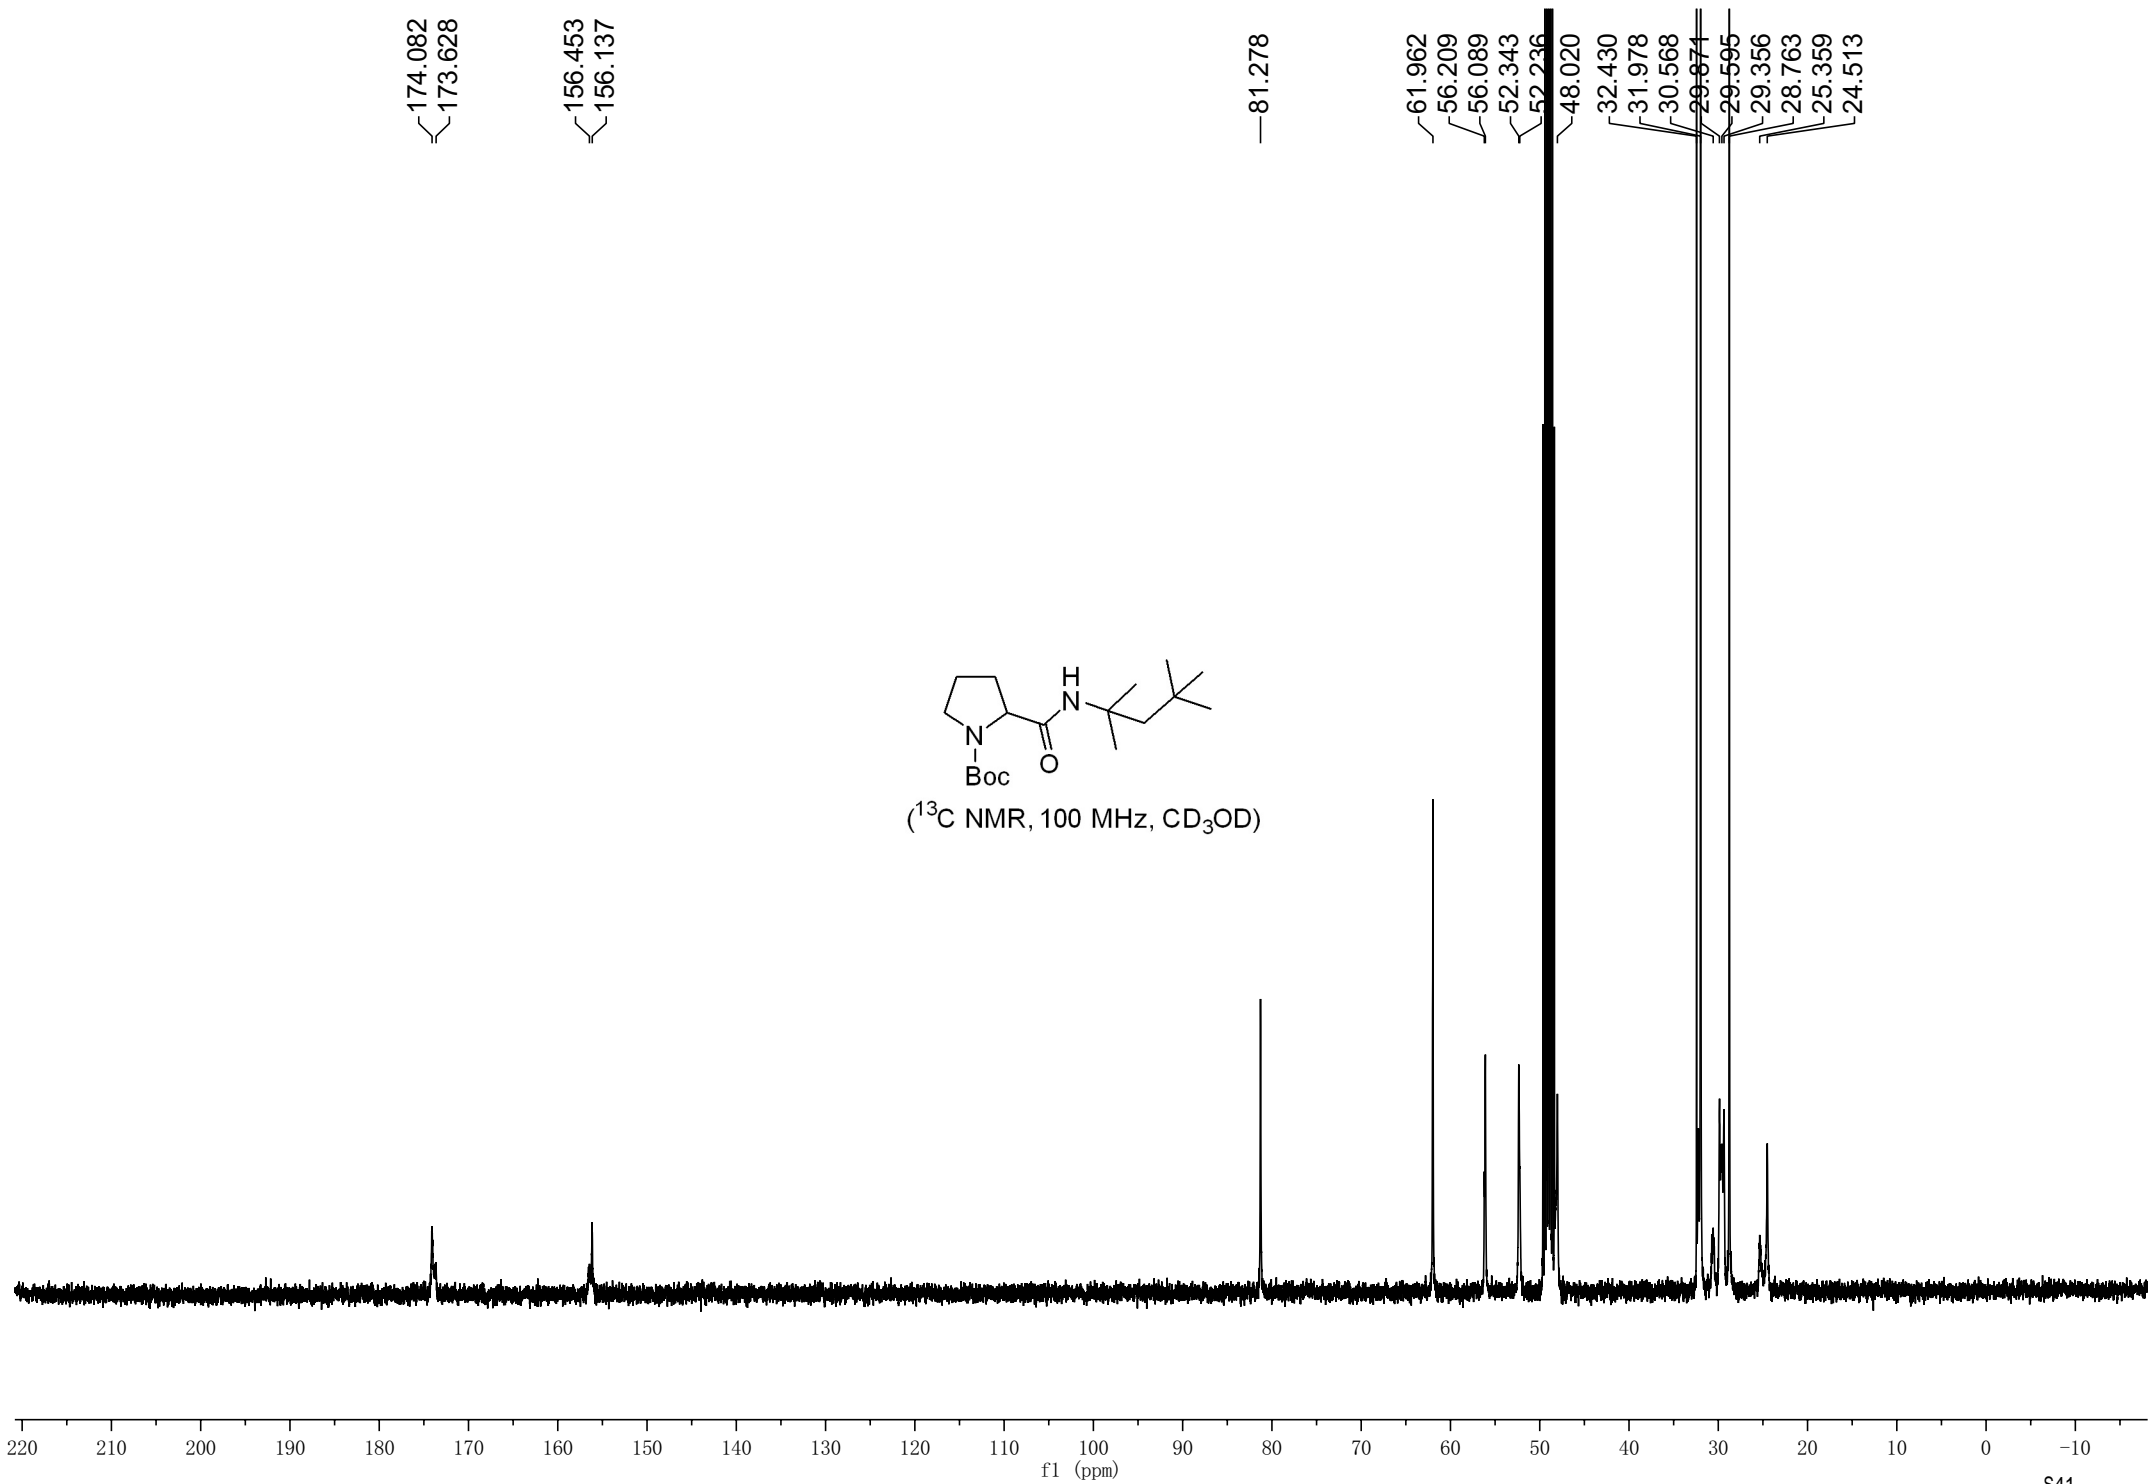

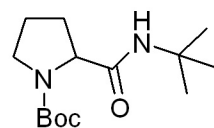

(<sup>1</sup>H NMR, 400 MHz, CD<sub>3</sub>OD)

4.097  
4.088  
4.077  
4.067  
3.496  
3.482  
3.431  
3.413  
3.396  
3.388  
1.945  
1.939  
1.929  
1.913  
1.895  
1.854  
1.841  
1.828  
1.813  
1.345

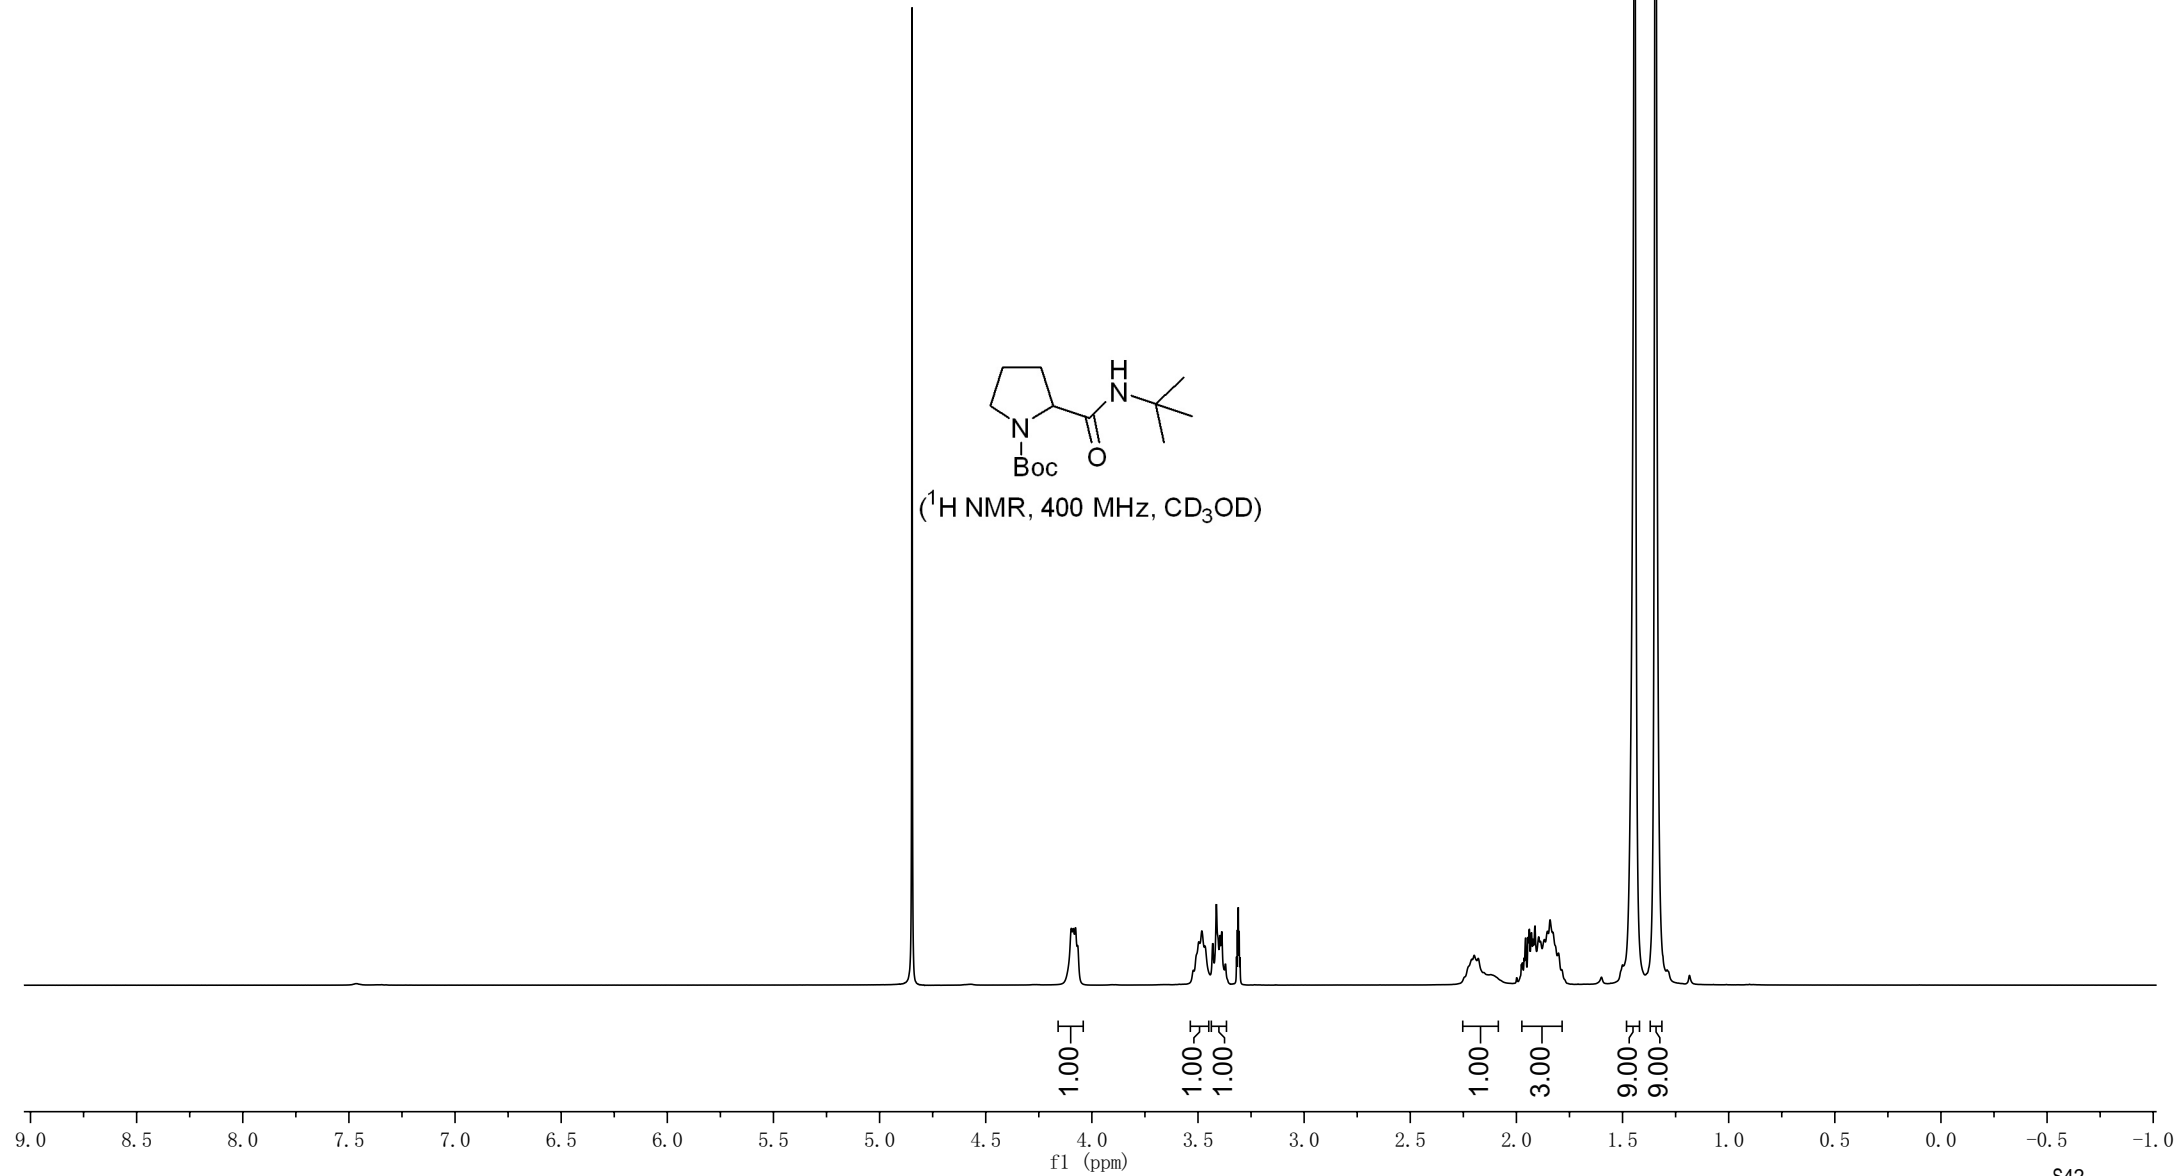

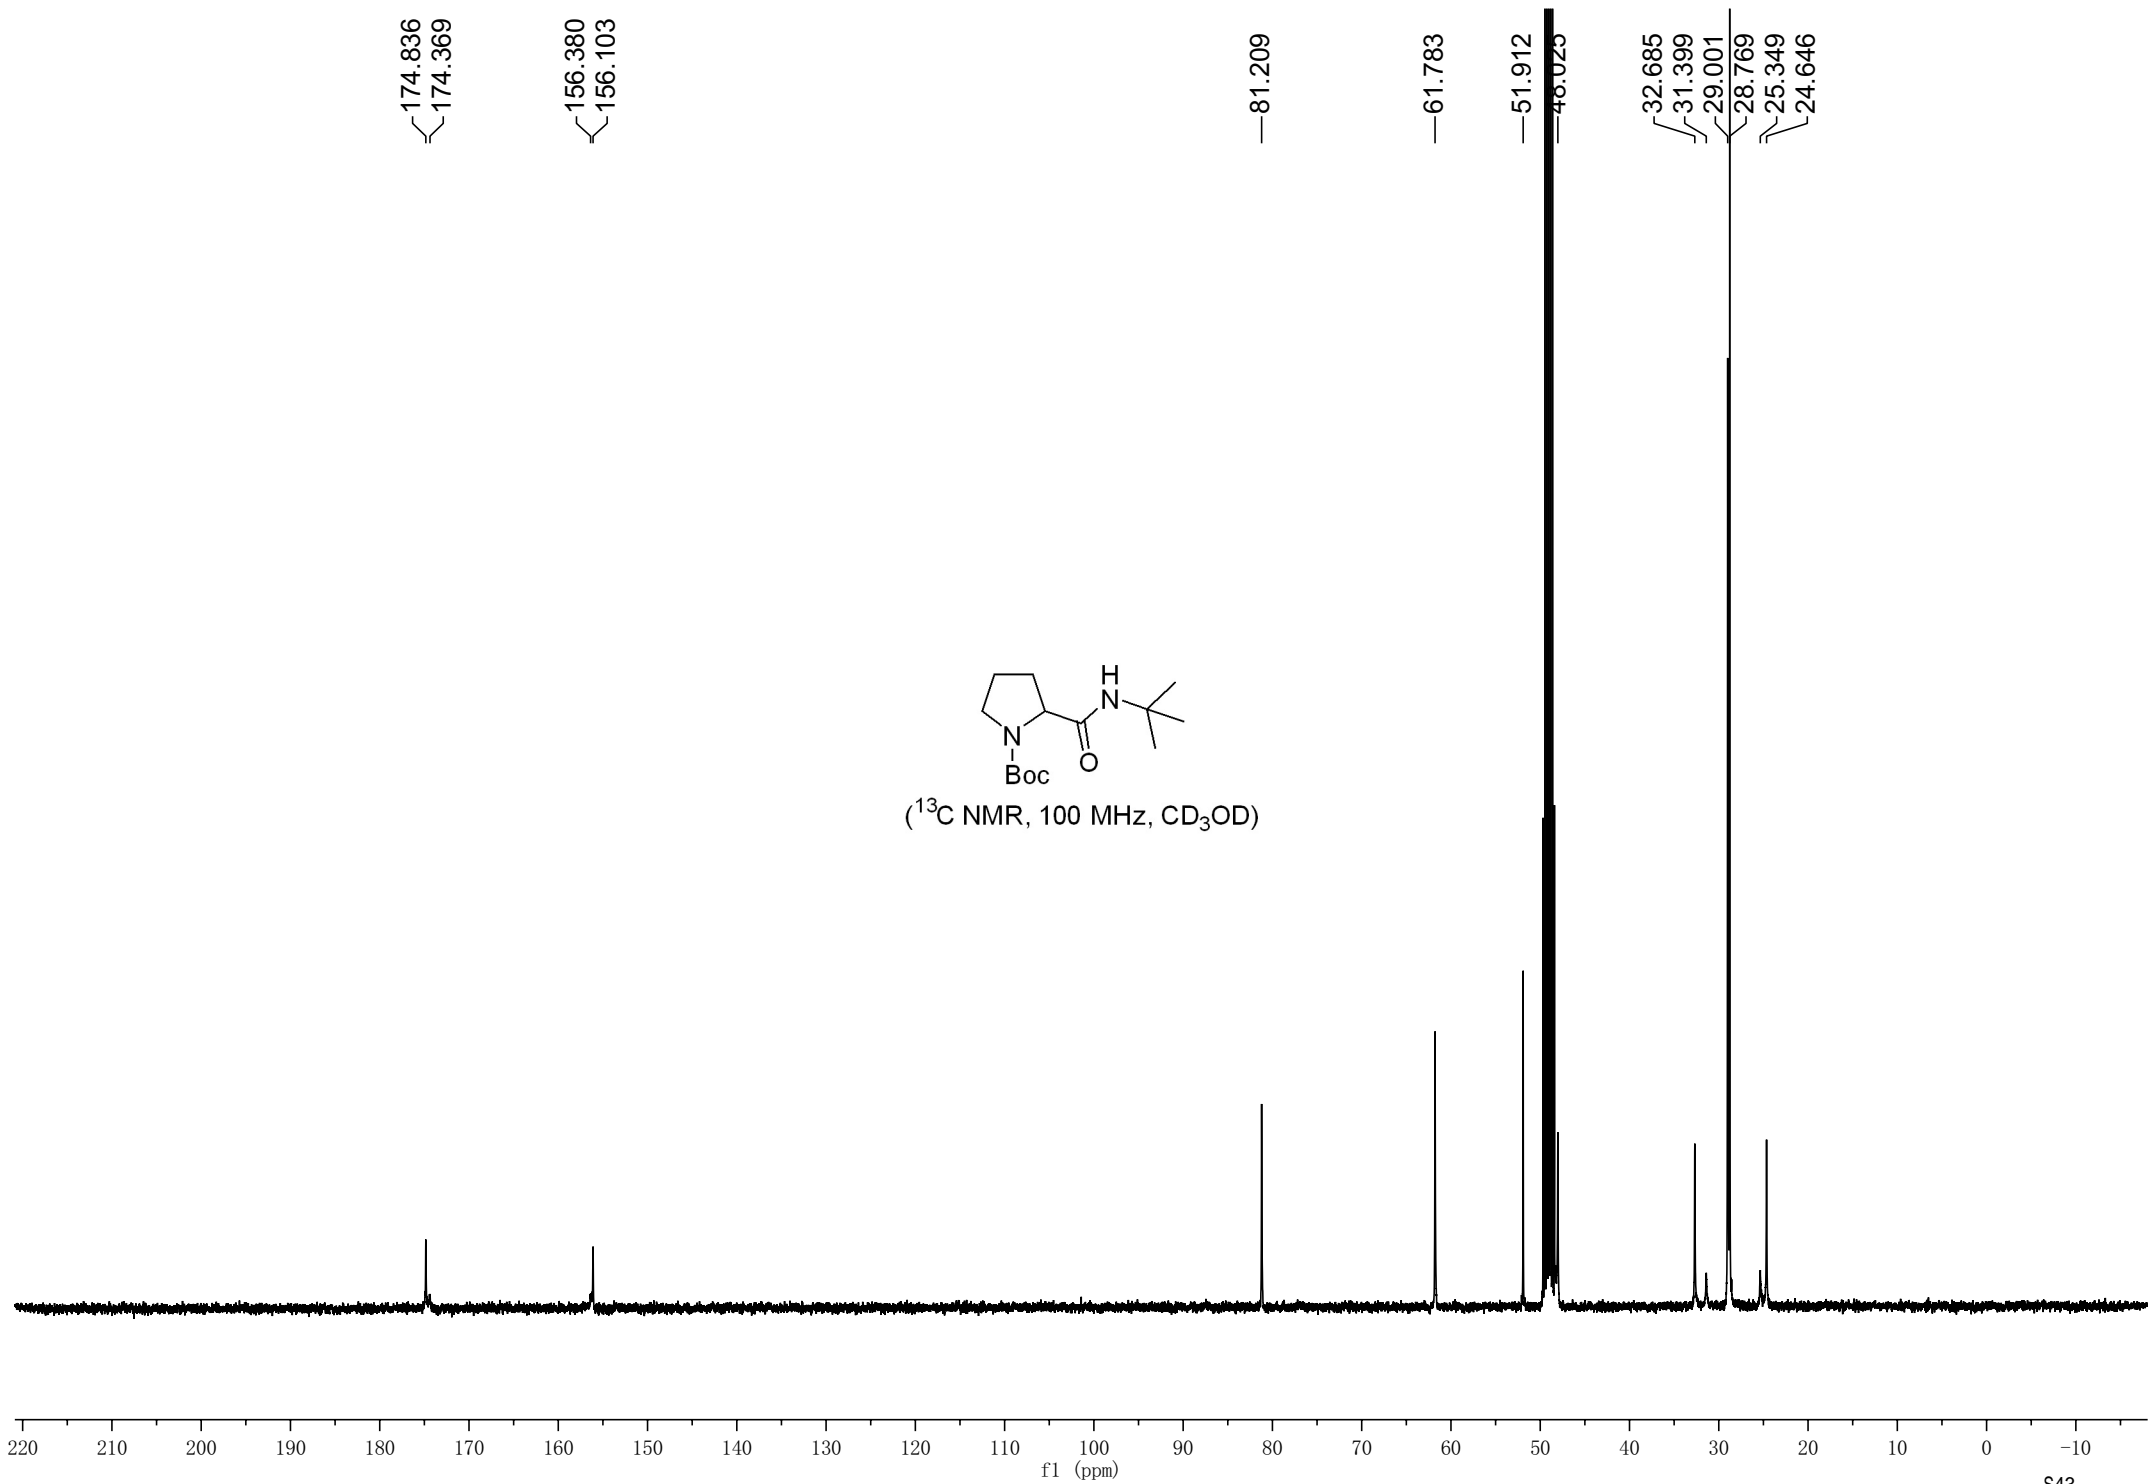



7.822  
7.802  
7.459  
7.441

4.948  
4.913  
4.869  
4.833  
4.580  
4.559  
4.545  
4.524  
4.156  
4.144  
4.135  
3.423  
3.407  
3.385

2.464  
2.134  
2.115  
2.094  
1.826  
1.810  
1.810  
1.400

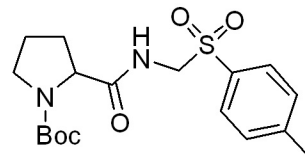

(<sup>1</sup>H NMR, 400 MHz, CD<sub>3</sub>OD)

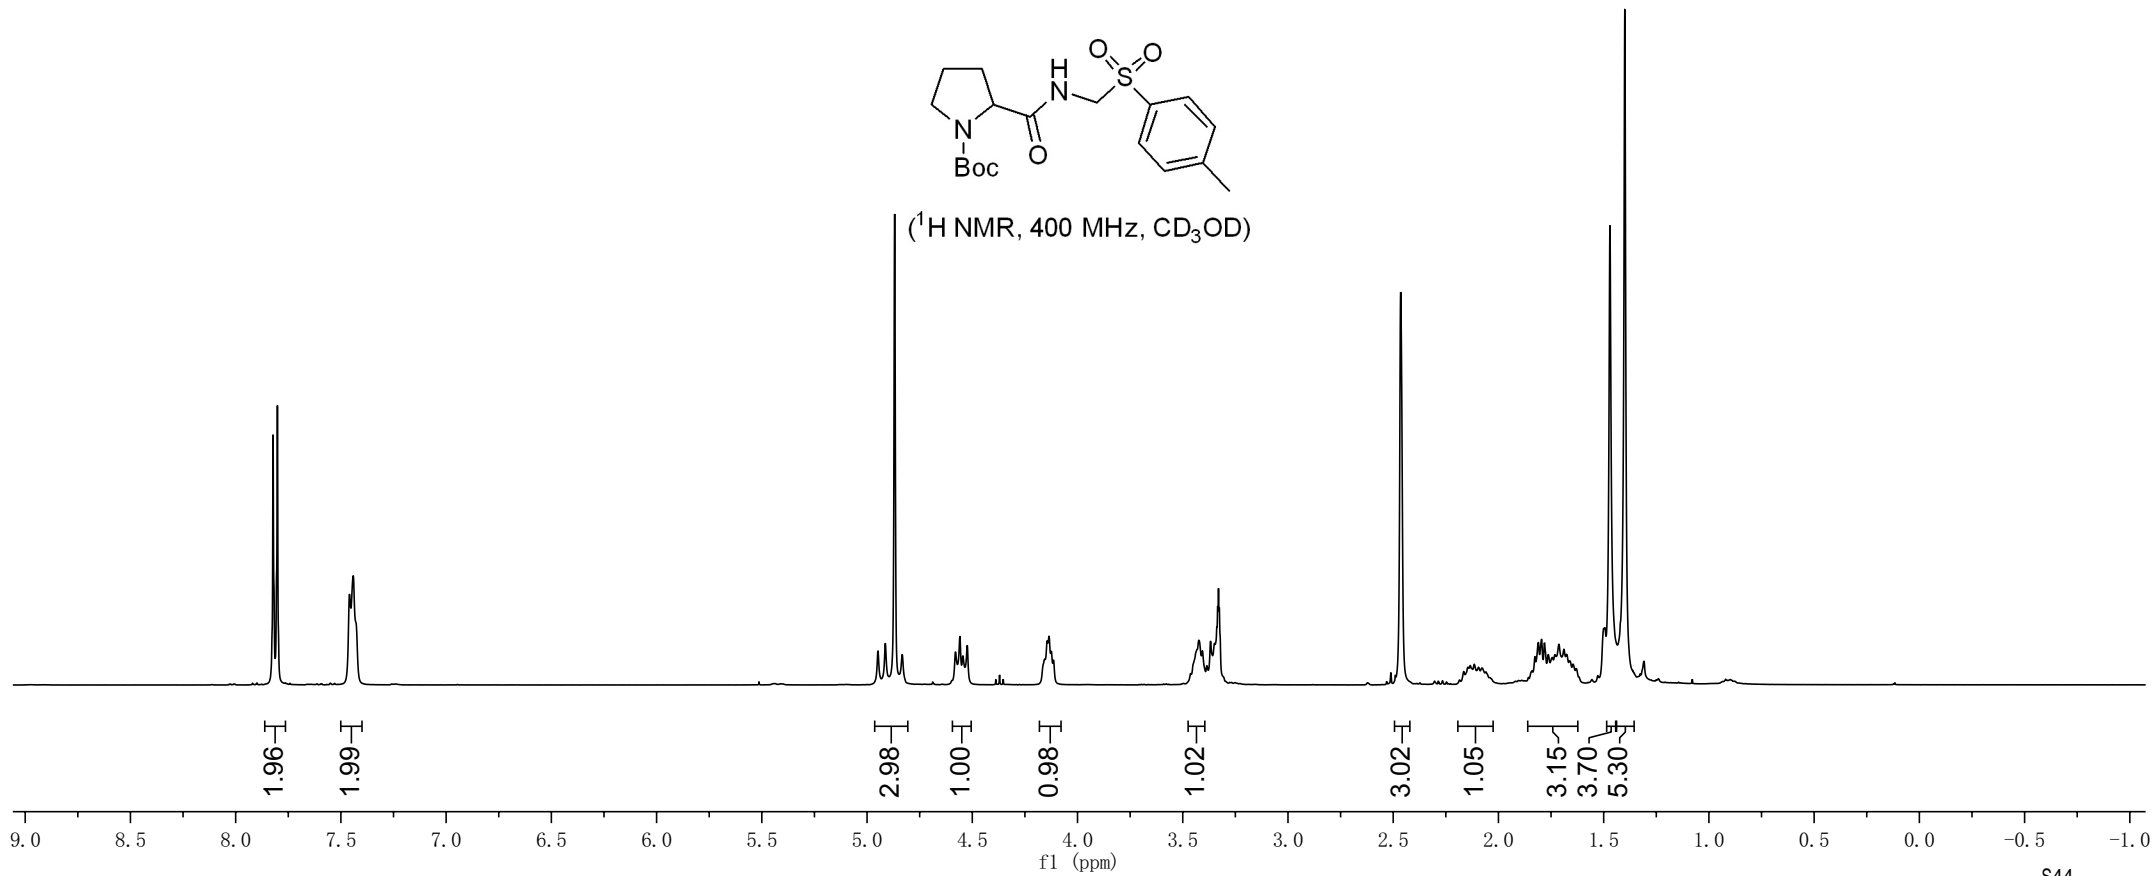

175.525  
175.034

156.409  
155.847

146.829  
146.684

136.112  
135.967

131.002  
130.178  
130.050

81.629  
81.380

61.517  
61.444  
61.182

48.158  
47.751

32.358  
31.227  
28.752  
28.688  
28.624  
25.209  
24.483  
21.650

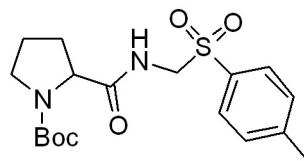

(<sup>13</sup>C NMR, 100 MHz, CD<sub>3</sub>OD)

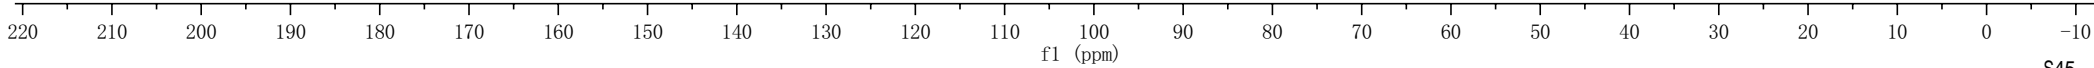

4.247  
4.239  
4.226  
4.216  
4.022  
3.978  
3.950  
3.907  
3.738  
3.574  
3.563  
3.556  
3.549  
3.545  
3.537  
3.530  
3.519  
3.461  
3.442  
3.435  
3.424  
3.417  
3.399  
2.022  
1.997  
1.978  
1.959  
1.940  
1.921  
1.904  
1.881  
1.886  
1.450

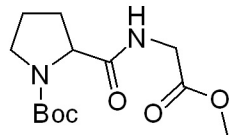

(<sup>1</sup>H NMR, 400 MHz, CD<sub>3</sub>OD)

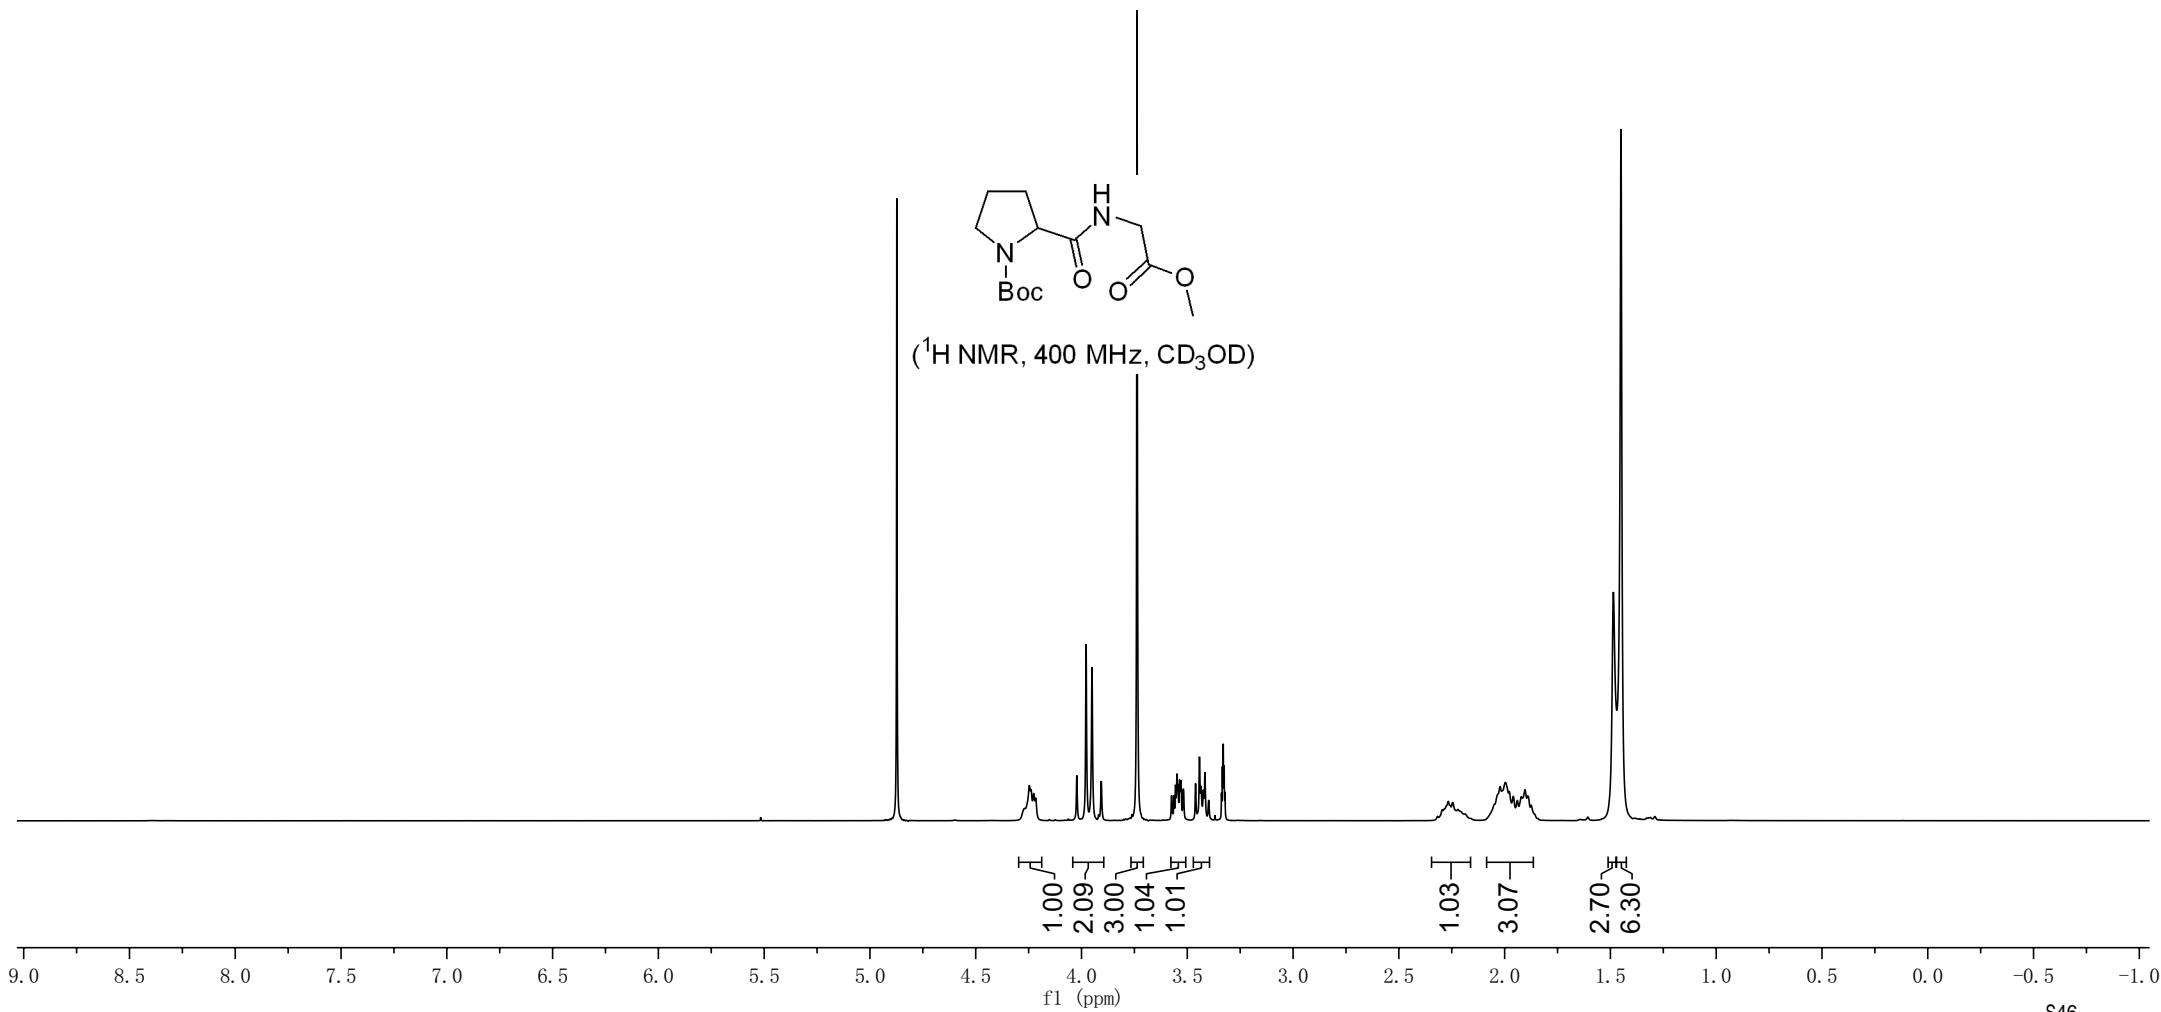

176.384  
175.961  
171.594  
171.444

156.513  
156.090

81.614  
81.390

61.880  
61.524

52.550  
47.877  
41.753

32.447  
31.439  
28.728  
28.599  
25.255  
24.563

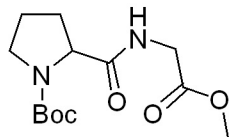

(<sup>13</sup>C NMR, 100 MHz, CD<sub>3</sub>OD)

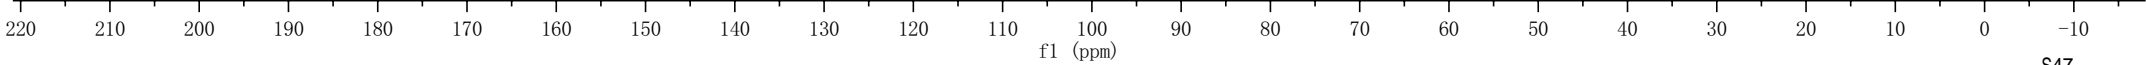

8.280  
8.276  
8.271  
8.259  
8.256  
8.251

7.564  
7.561  
7.544  
7.541  
7.337  
7.316  
7.312  
7.298  
7.283  
7.279  
7.263  
7.258  
7.252  
7.246  
7.243  
7.038  
7.035  
5.205  
5.168

4.027  
4.019  
4.009  
3.995  
3.990

2.707  
2.686  
2.665  
2.643  
2.522  
2.511  
2.497  
2.487  
2.479  
2.455  
2.445  
2.406  
2.396  
2.384  
2.373  
2.351  
2.216  
2.207  
2.197  
2.193  
2.184  
2.175  
2.165  
2.150  
2.100

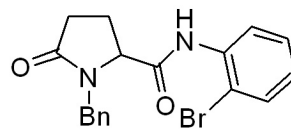

(<sup>1</sup>H NMR, 400 MHz, CDCl<sub>3</sub>)

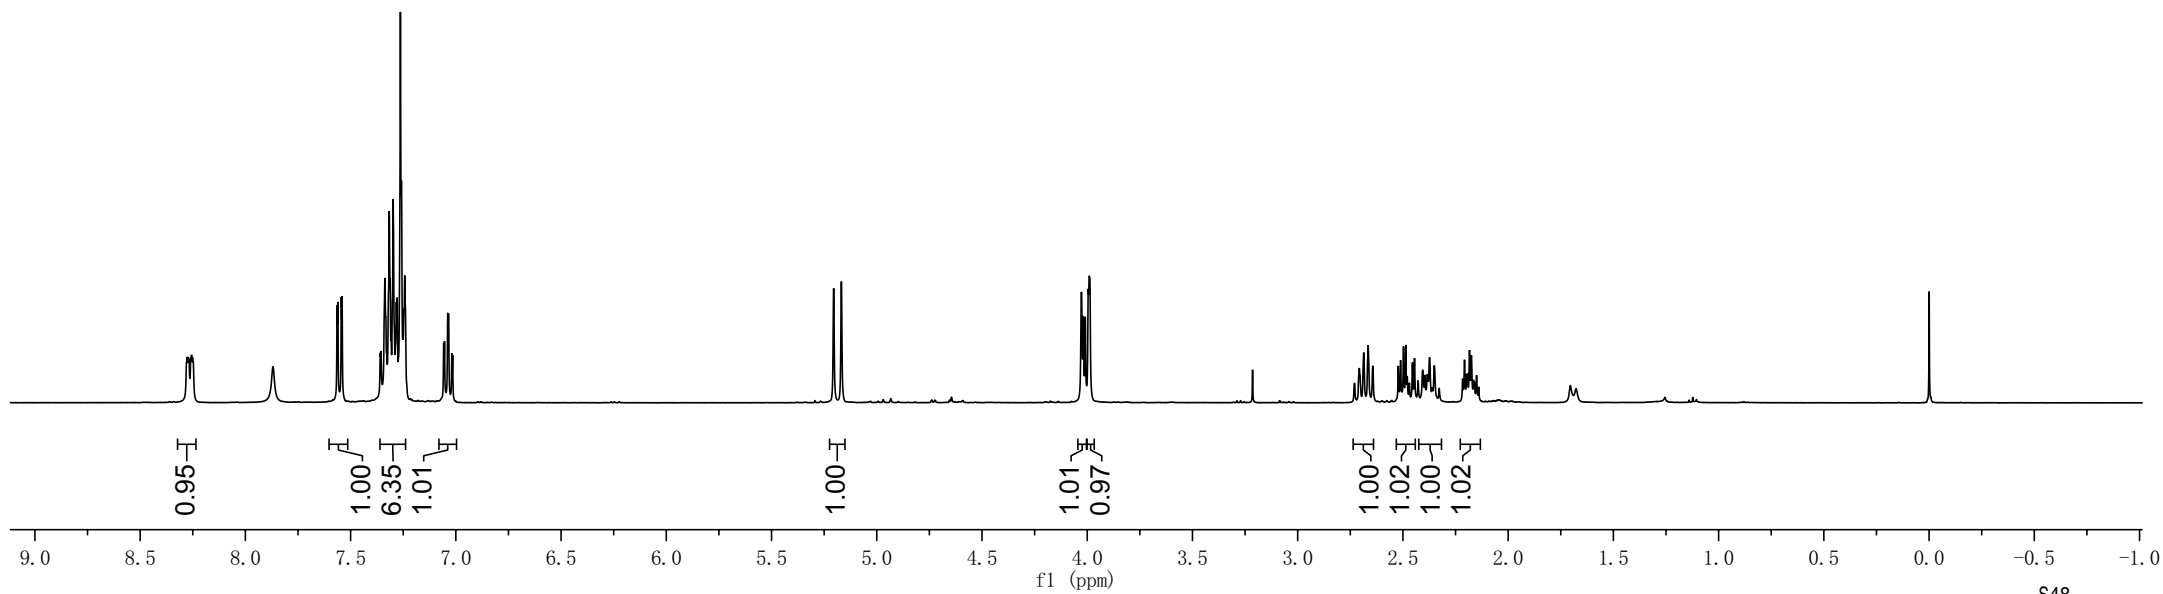

—175.745  
—169.609  
—169.526

135.565  
134.794  
134.721  
132.479  
129.084  
128.773  
128.634  
128.184  
—126.159  
—122.247  
—122.156  
—114.067  
—113.938

—61.455

—46.093

—29.697

—23.810

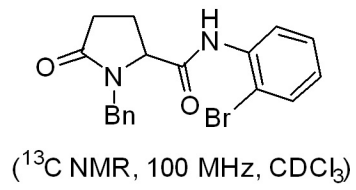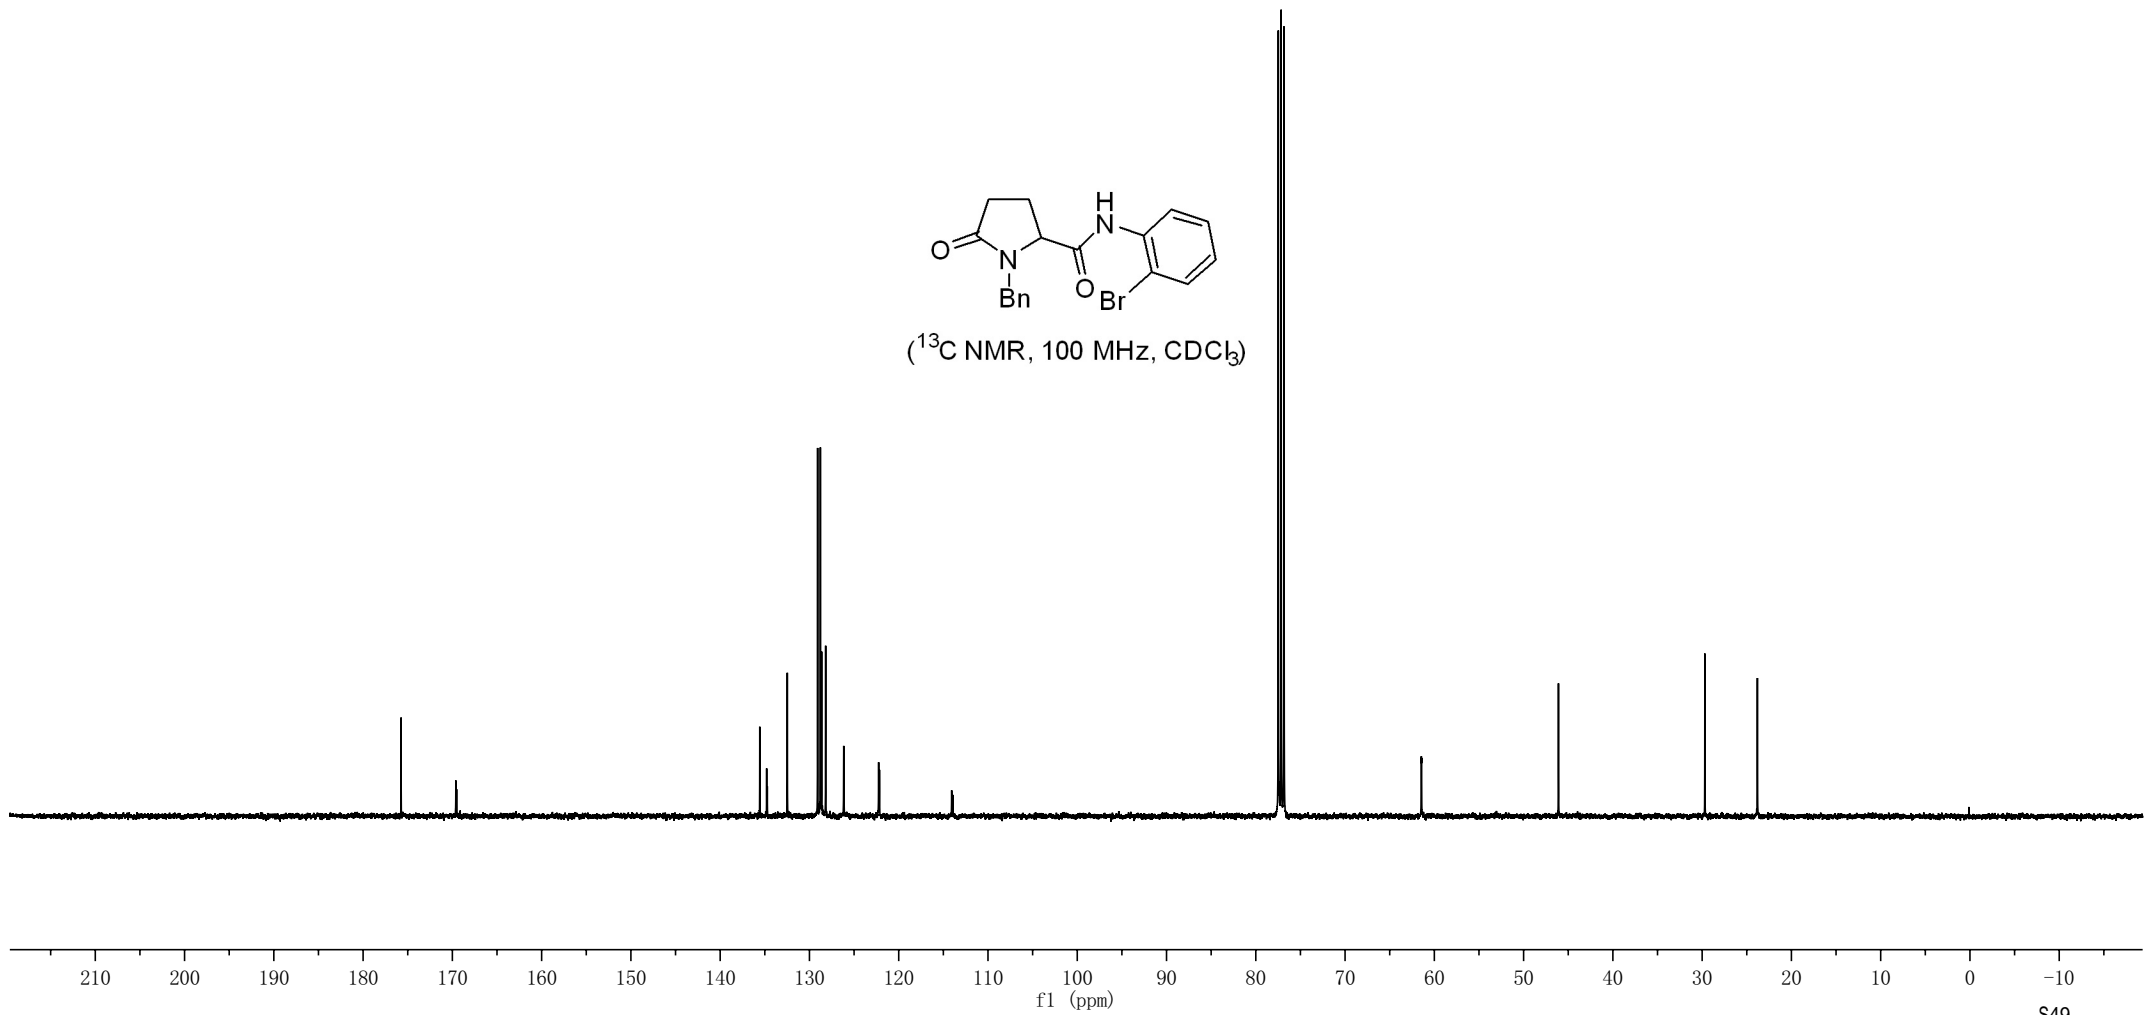

7.361  
7.357  
7.340  
7.337  
7.321  
7.302  
7.285  
7.226  
7.208

4.980  
4.943

3.943  
3.932  
3.921  
3.910  
3.862  
3.825

2.560  
2.541  
2.538  
2.518  
2.430  
2.417  
2.405  
2.392  
2.210  
2.206  
1.936  
1.924  
1.913  
1.904  
1.888

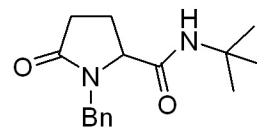

(<sup>1</sup>H NMR, 400 MHz, CD<sub>3</sub>OD)

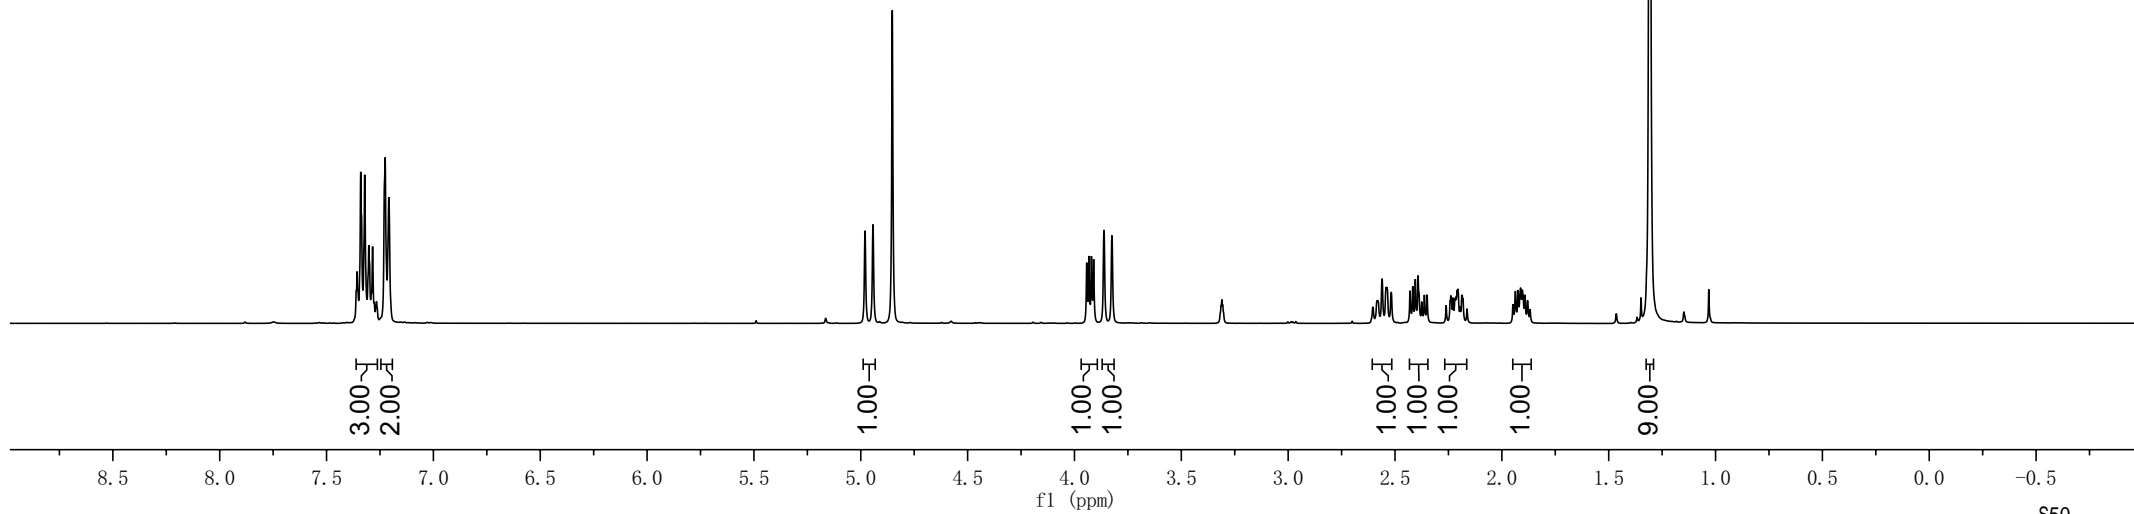

—178.258  
—172.574

137.158  
129.806  
129.388  
128.828

—61.771  
—52.201  
—46.458

~30.870  
~28.741  
~24.148

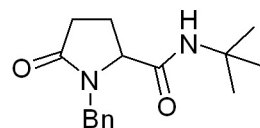

(<sup>13</sup>C NMR, 100 MHz, CD<sub>3</sub>OD)

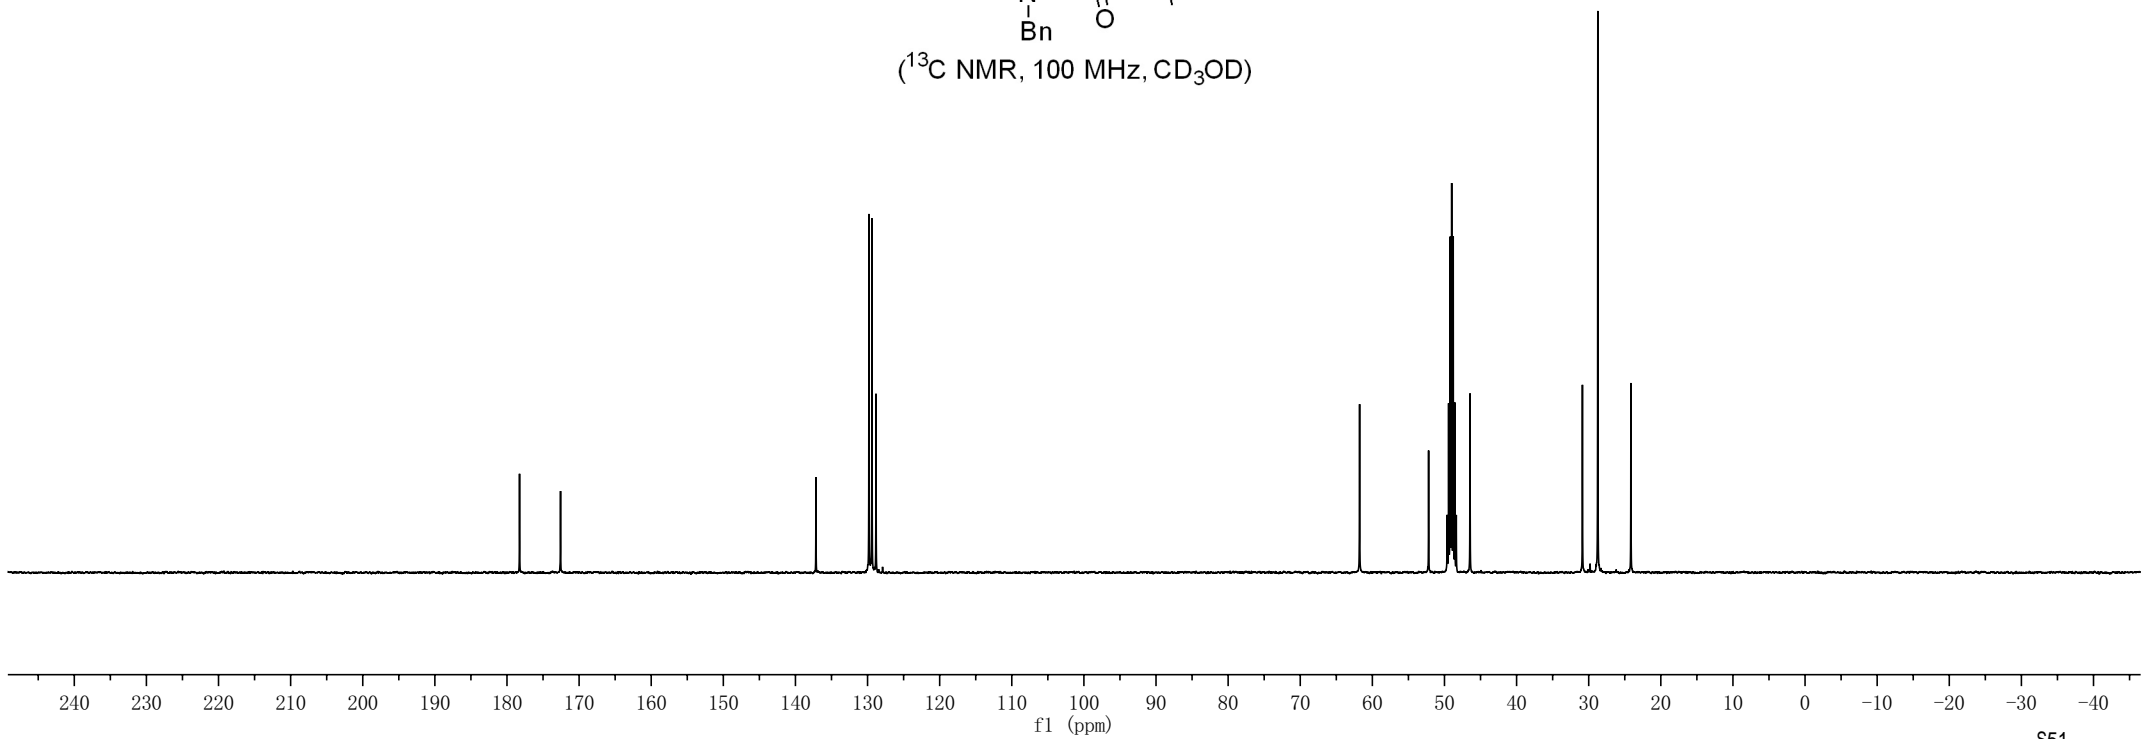



7.811  
7.790  
7.380  
7.360  
7.315  
7.311  
7.297  
7.289  
7.278  
7.263  
7.168  
7.164  
7.148  
7.146

5.034  
4.997  
4.667  
4.654  
4.650

3.849  
3.841  
3.826  
3.817  
3.778  
3.741

2.507  
2.486  
2.464  
2.452  
2.427  
2.416  
2.402  
2.391  
2.360  
2.349  
2.222  
2.212  
2.199  
2.189  
2.166  
2.073  
1.812  
1.802  
1.798  
1.788  
1.778  
1.755

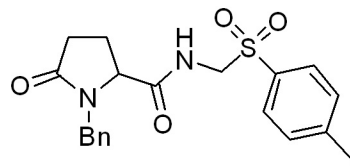

(<sup>1</sup>H NMR, 400 MHz, CDCl<sub>3</sub>)

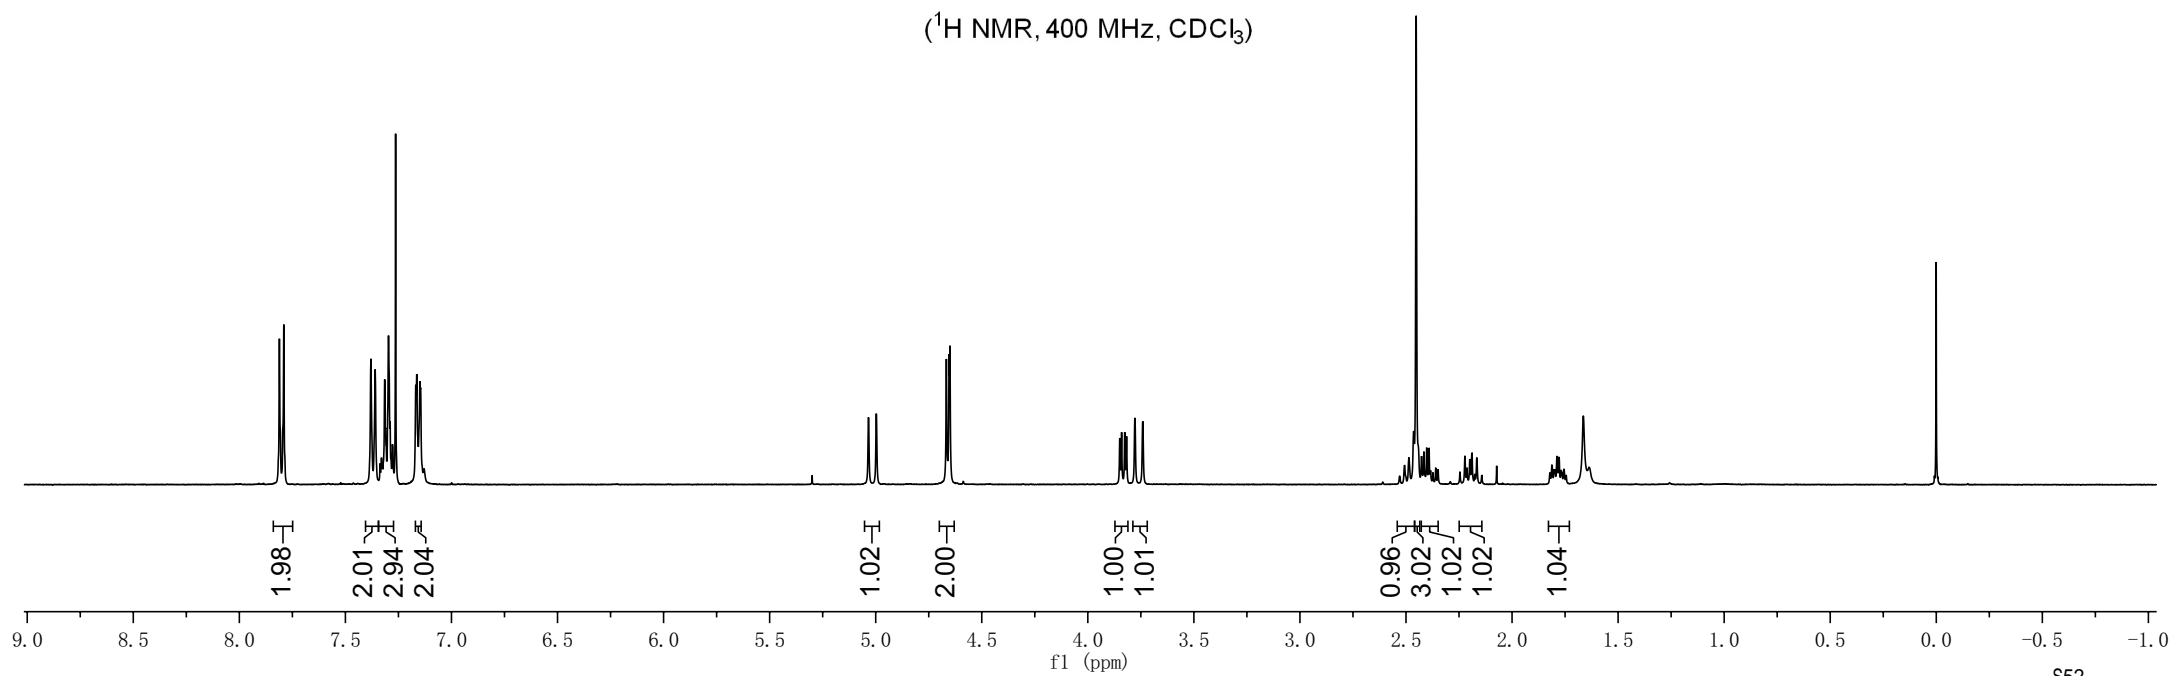

—175.821  
—171.308

—145.885  
—135.614  
—134.274  
—130.185  
—129.068  
—128.851  
—128.612  
—128.193

—60.320  
—60.196

—45.819

—29.636  
—23.543  
—21.883

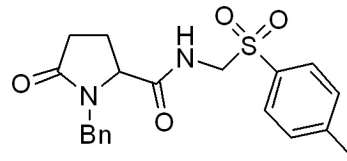

(<sup>13</sup>C NMR, 100 MHz, CDCl<sub>3</sub>)

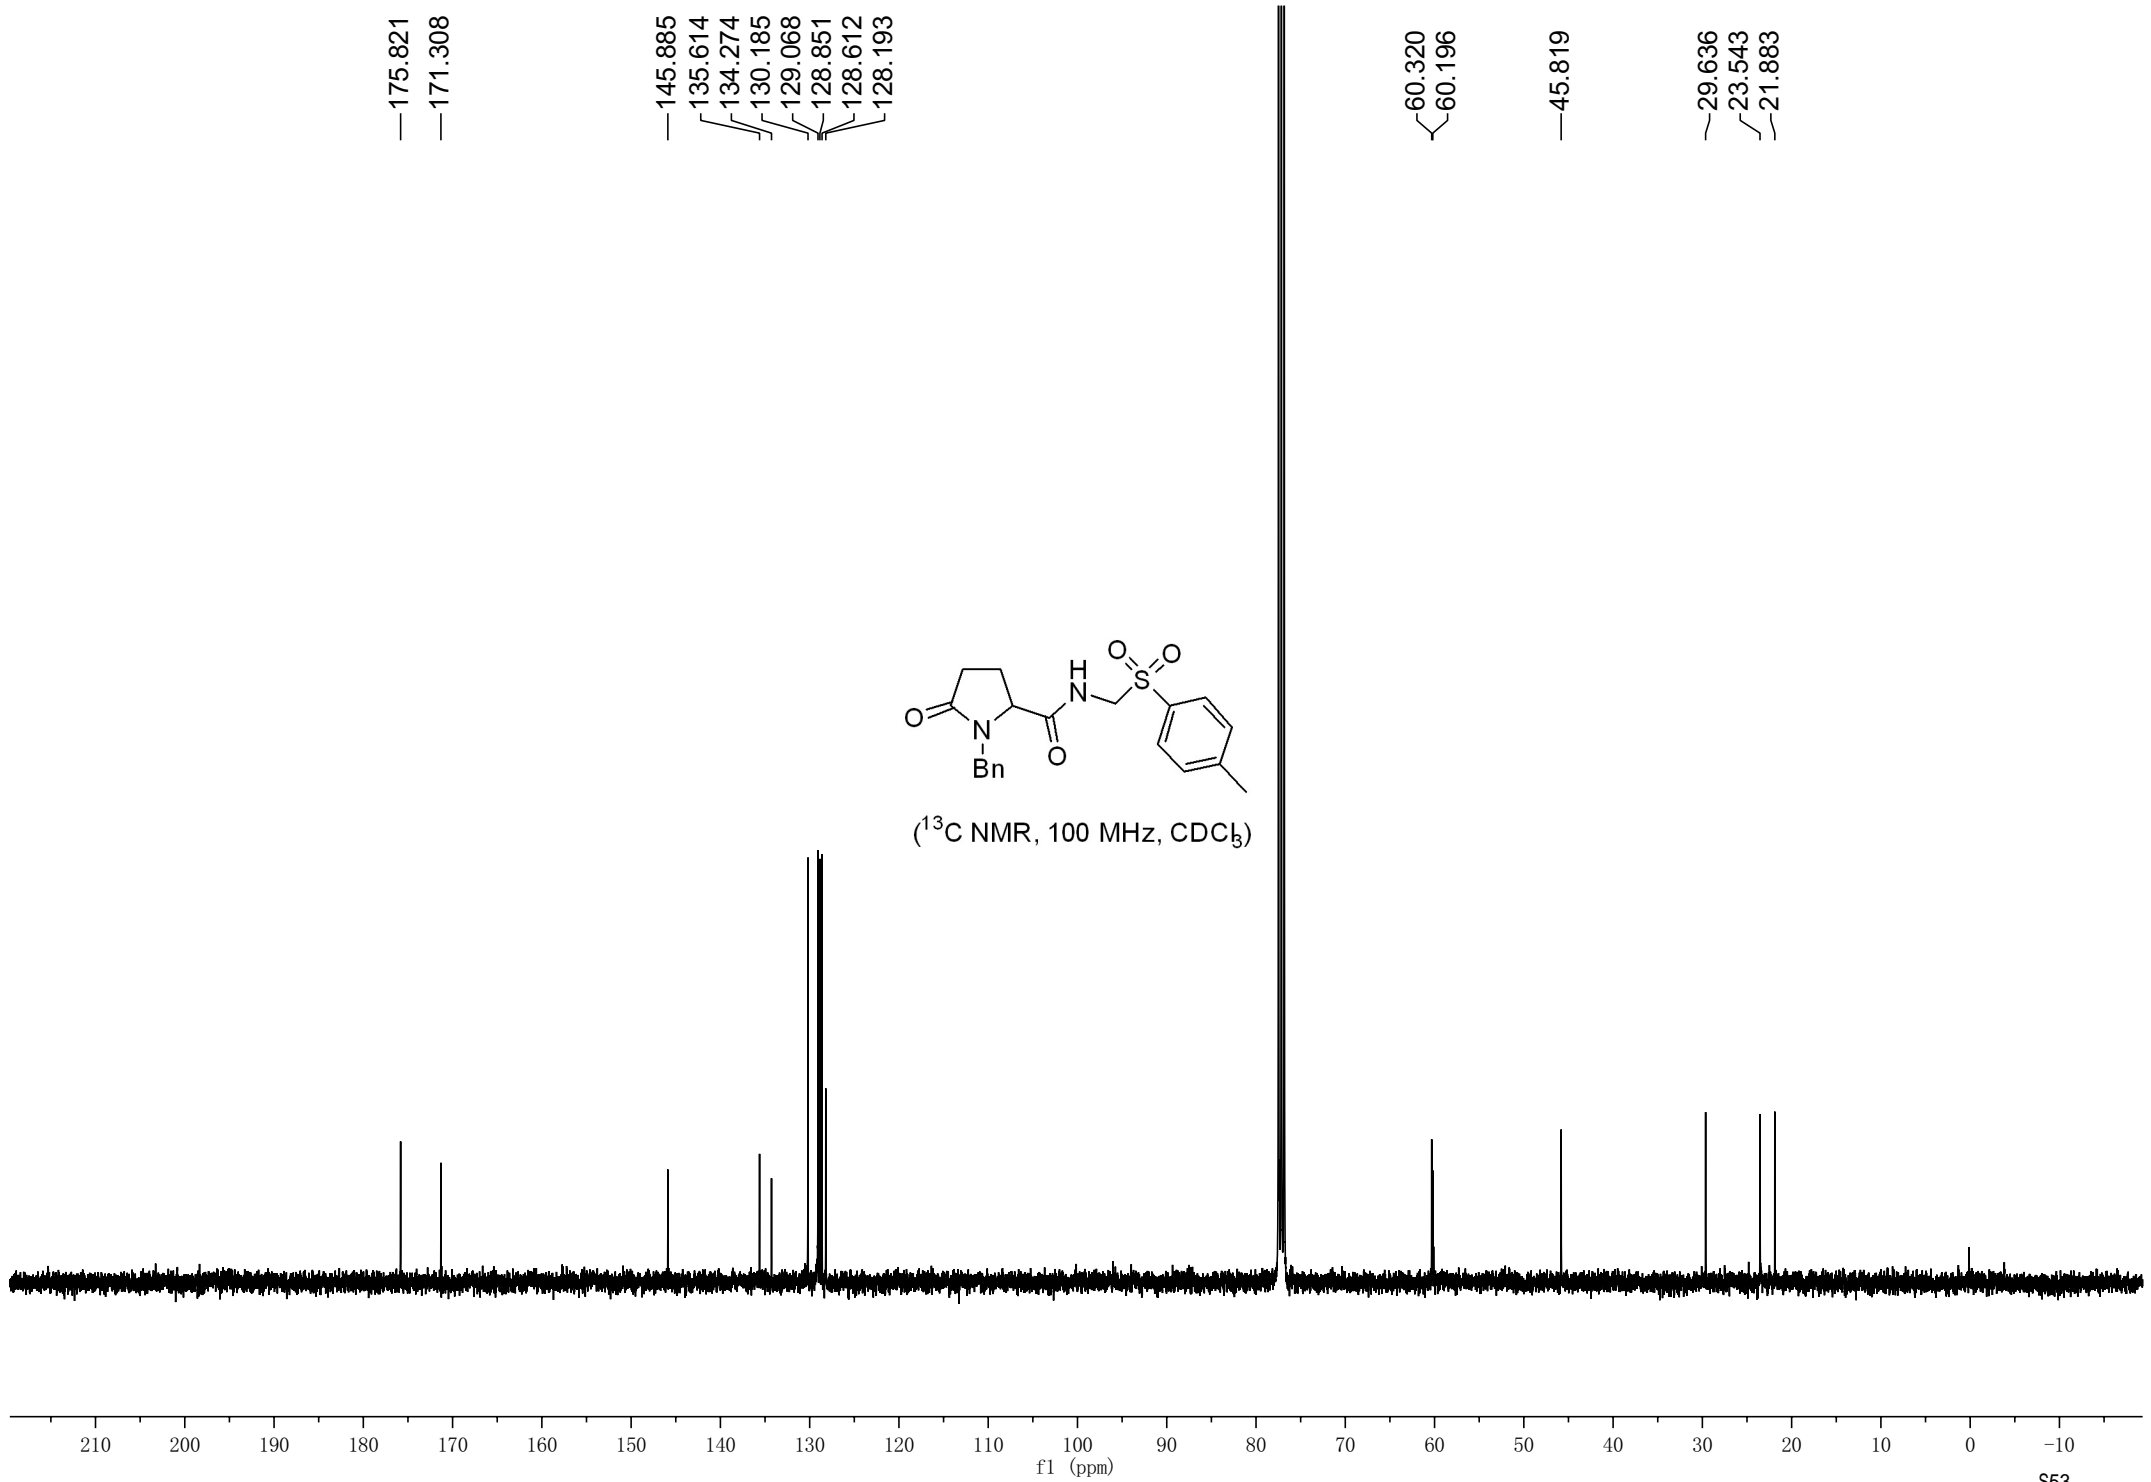

7.343  
7.338  
7.334  
7.327  
7.322  
7.302  
7.299  
7.285  
7.281  
7.265

5.047  
5.010

4.041  
4.031  
4.019  
4.009  
3.945  
3.937  
3.883  
3.846  
3.744

2.586  
2.566  
2.545  
2.523  
2.455  
2.443  
2.430  
2.418  
2.412  
2.387  
2.376  
2.320  
2.298  
2.288  
2.278  
2.274  
2.268  
2.265  
2.245  
2.241  
2.063  
2.052  
2.041  
2.038  
2.028  
2.019  
2.008  
2.006  
1.995

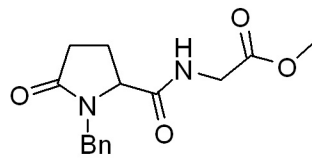

(<sup>1</sup>H NMR, 400 MHz, CD<sub>3</sub>OD)

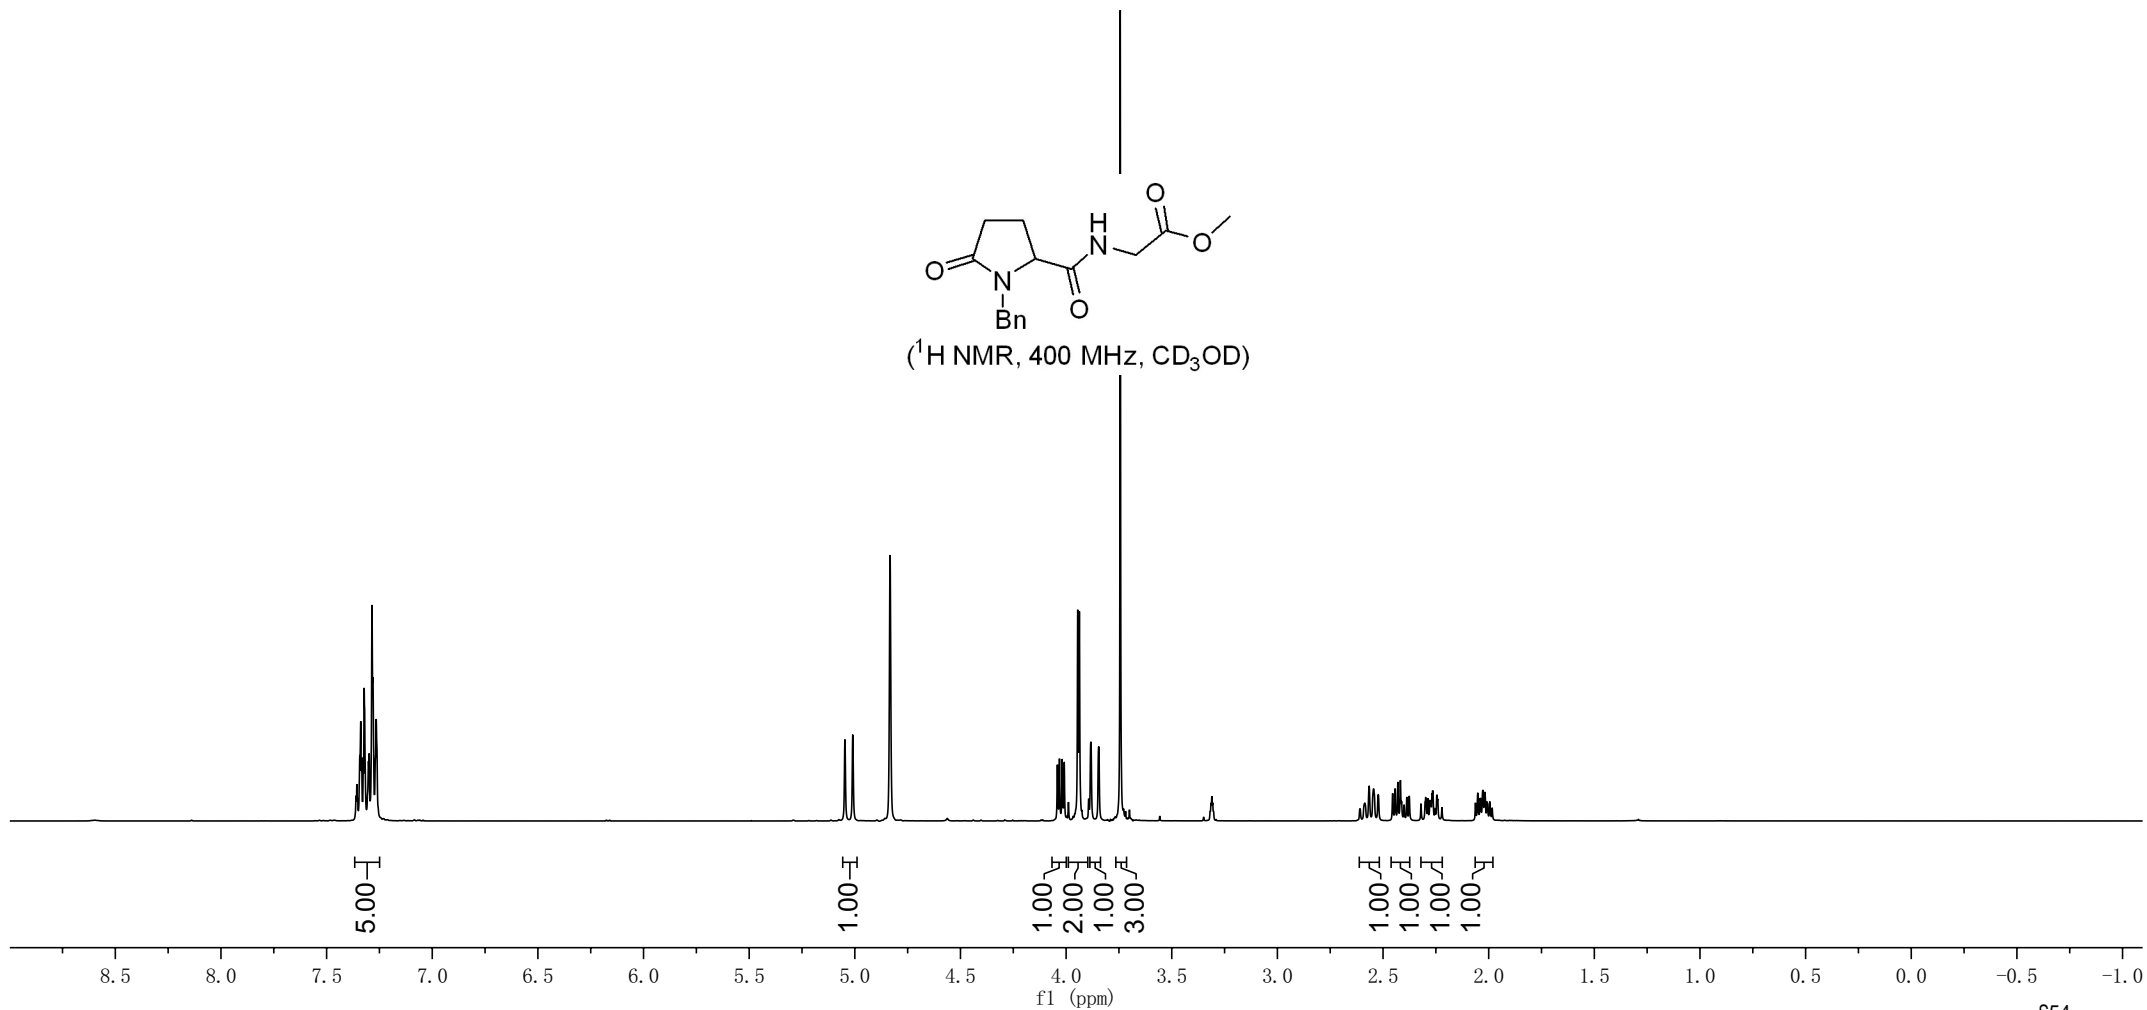

—178.180  
—174.300  
—171.383

—137.120  
—129.807  
—129.507  
—128.849

—61.255

—52.672  
—46.274  
—41.767

—30.743

—23.941

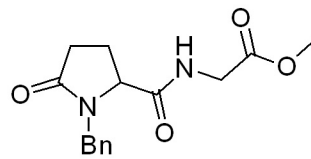

(<sup>13</sup>C NMR, 100 MHz, CD<sub>3</sub>OD)

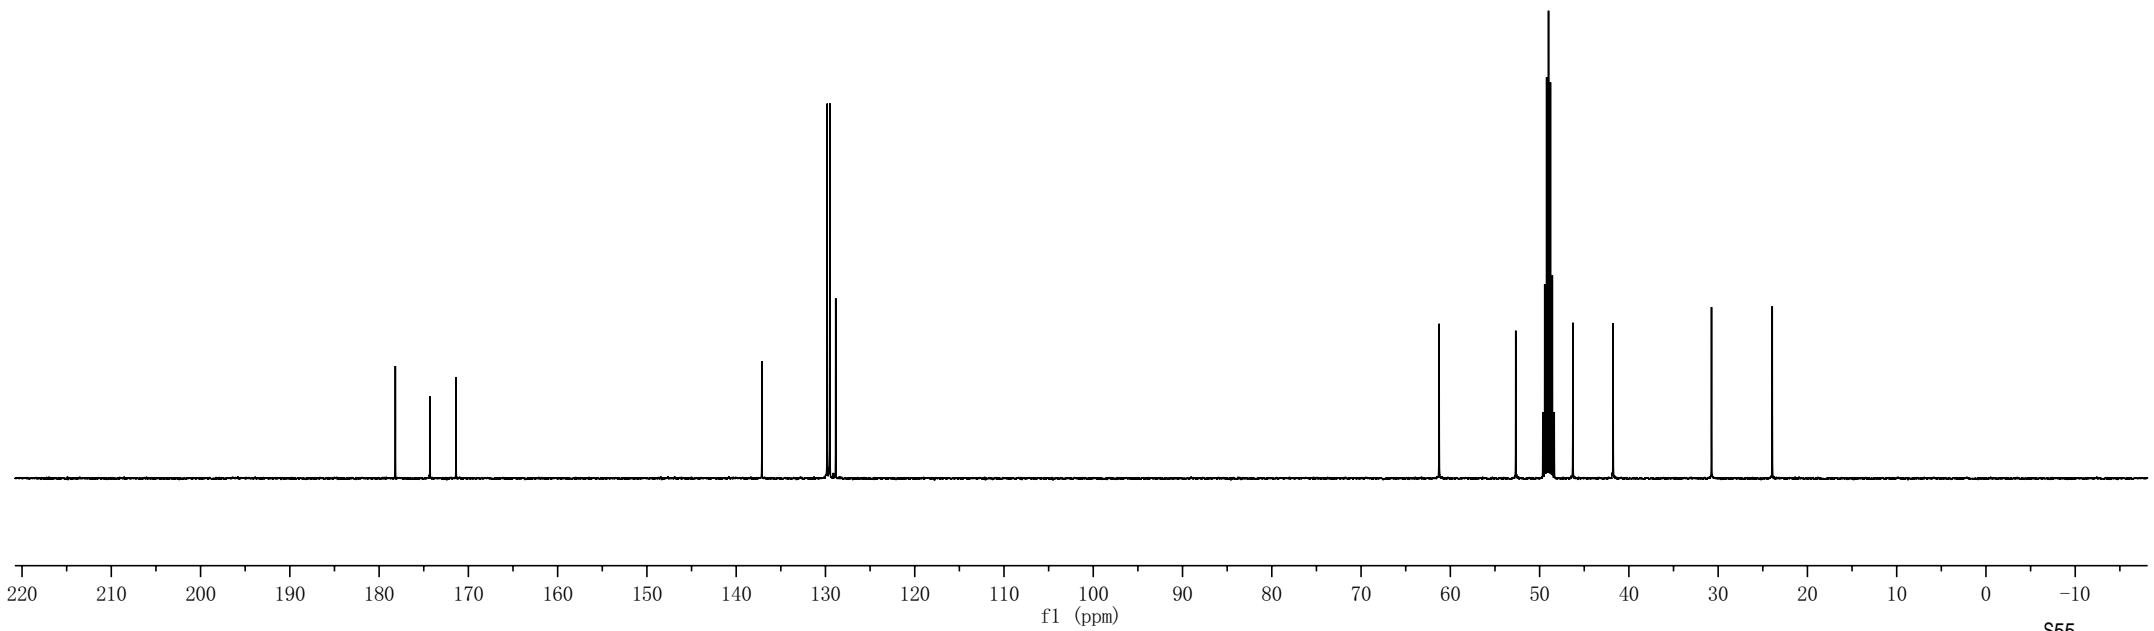

7.423  
7.406  
7.402  
7.390  
7.387  
7.385  
7.382  
7.380  
7.373  
7.369  
7.365  
7.361  
7.351  
7.343  
7.329  
7.325  
7.313  
7.309  
7.305  
7.300  
7.296  
7.283  
7.174  
7.170  
7.154

4.924  
4.887

4.007  
3.999  
3.985  
3.976  
3.713  
3.676

2.455  
2.434  
2.412  
2.390  
2.363  
2.352  
2.338  
2.328  
2.321  
2.310  
2.296  
2.285  
2.199  
2.176  
2.166  
2.153  
2.144  
2.130  
2.120  
2.098  
1.835  
1.825  
1.816  
1.811  
1.802  
1.792  
1.783  
1.778  
1.769  
1.759

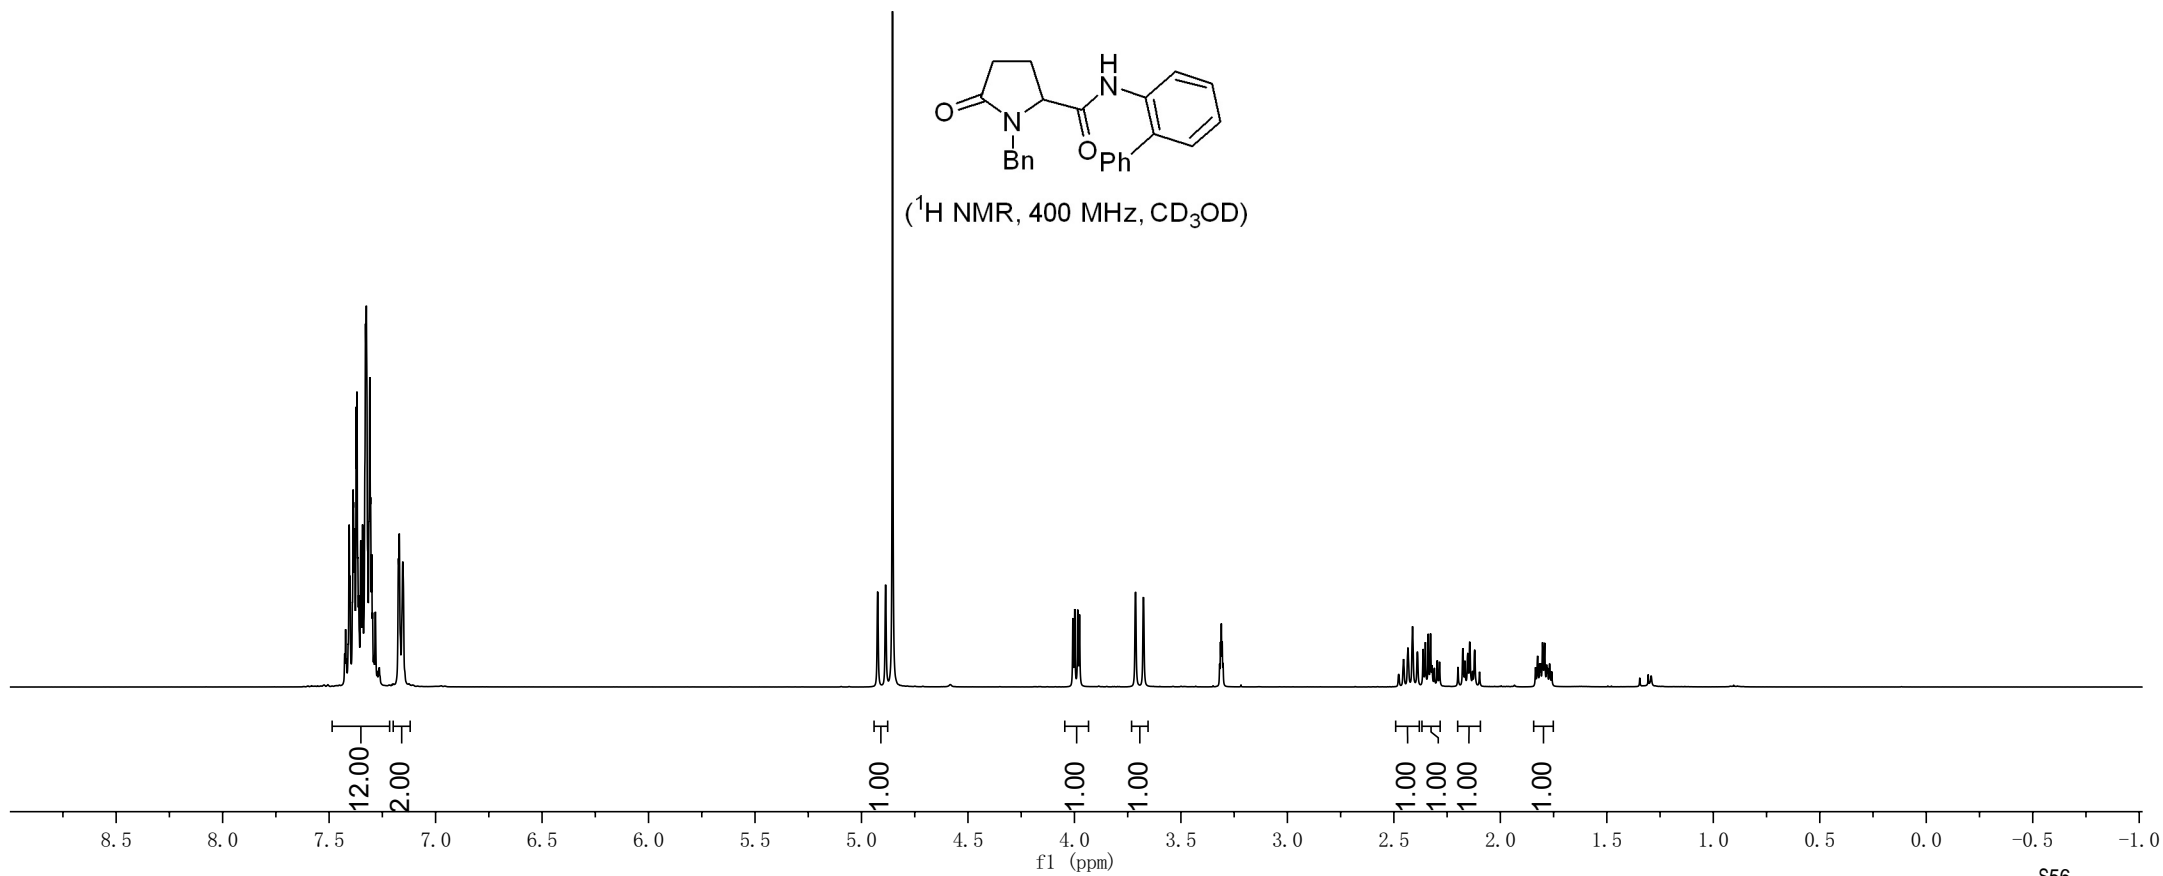

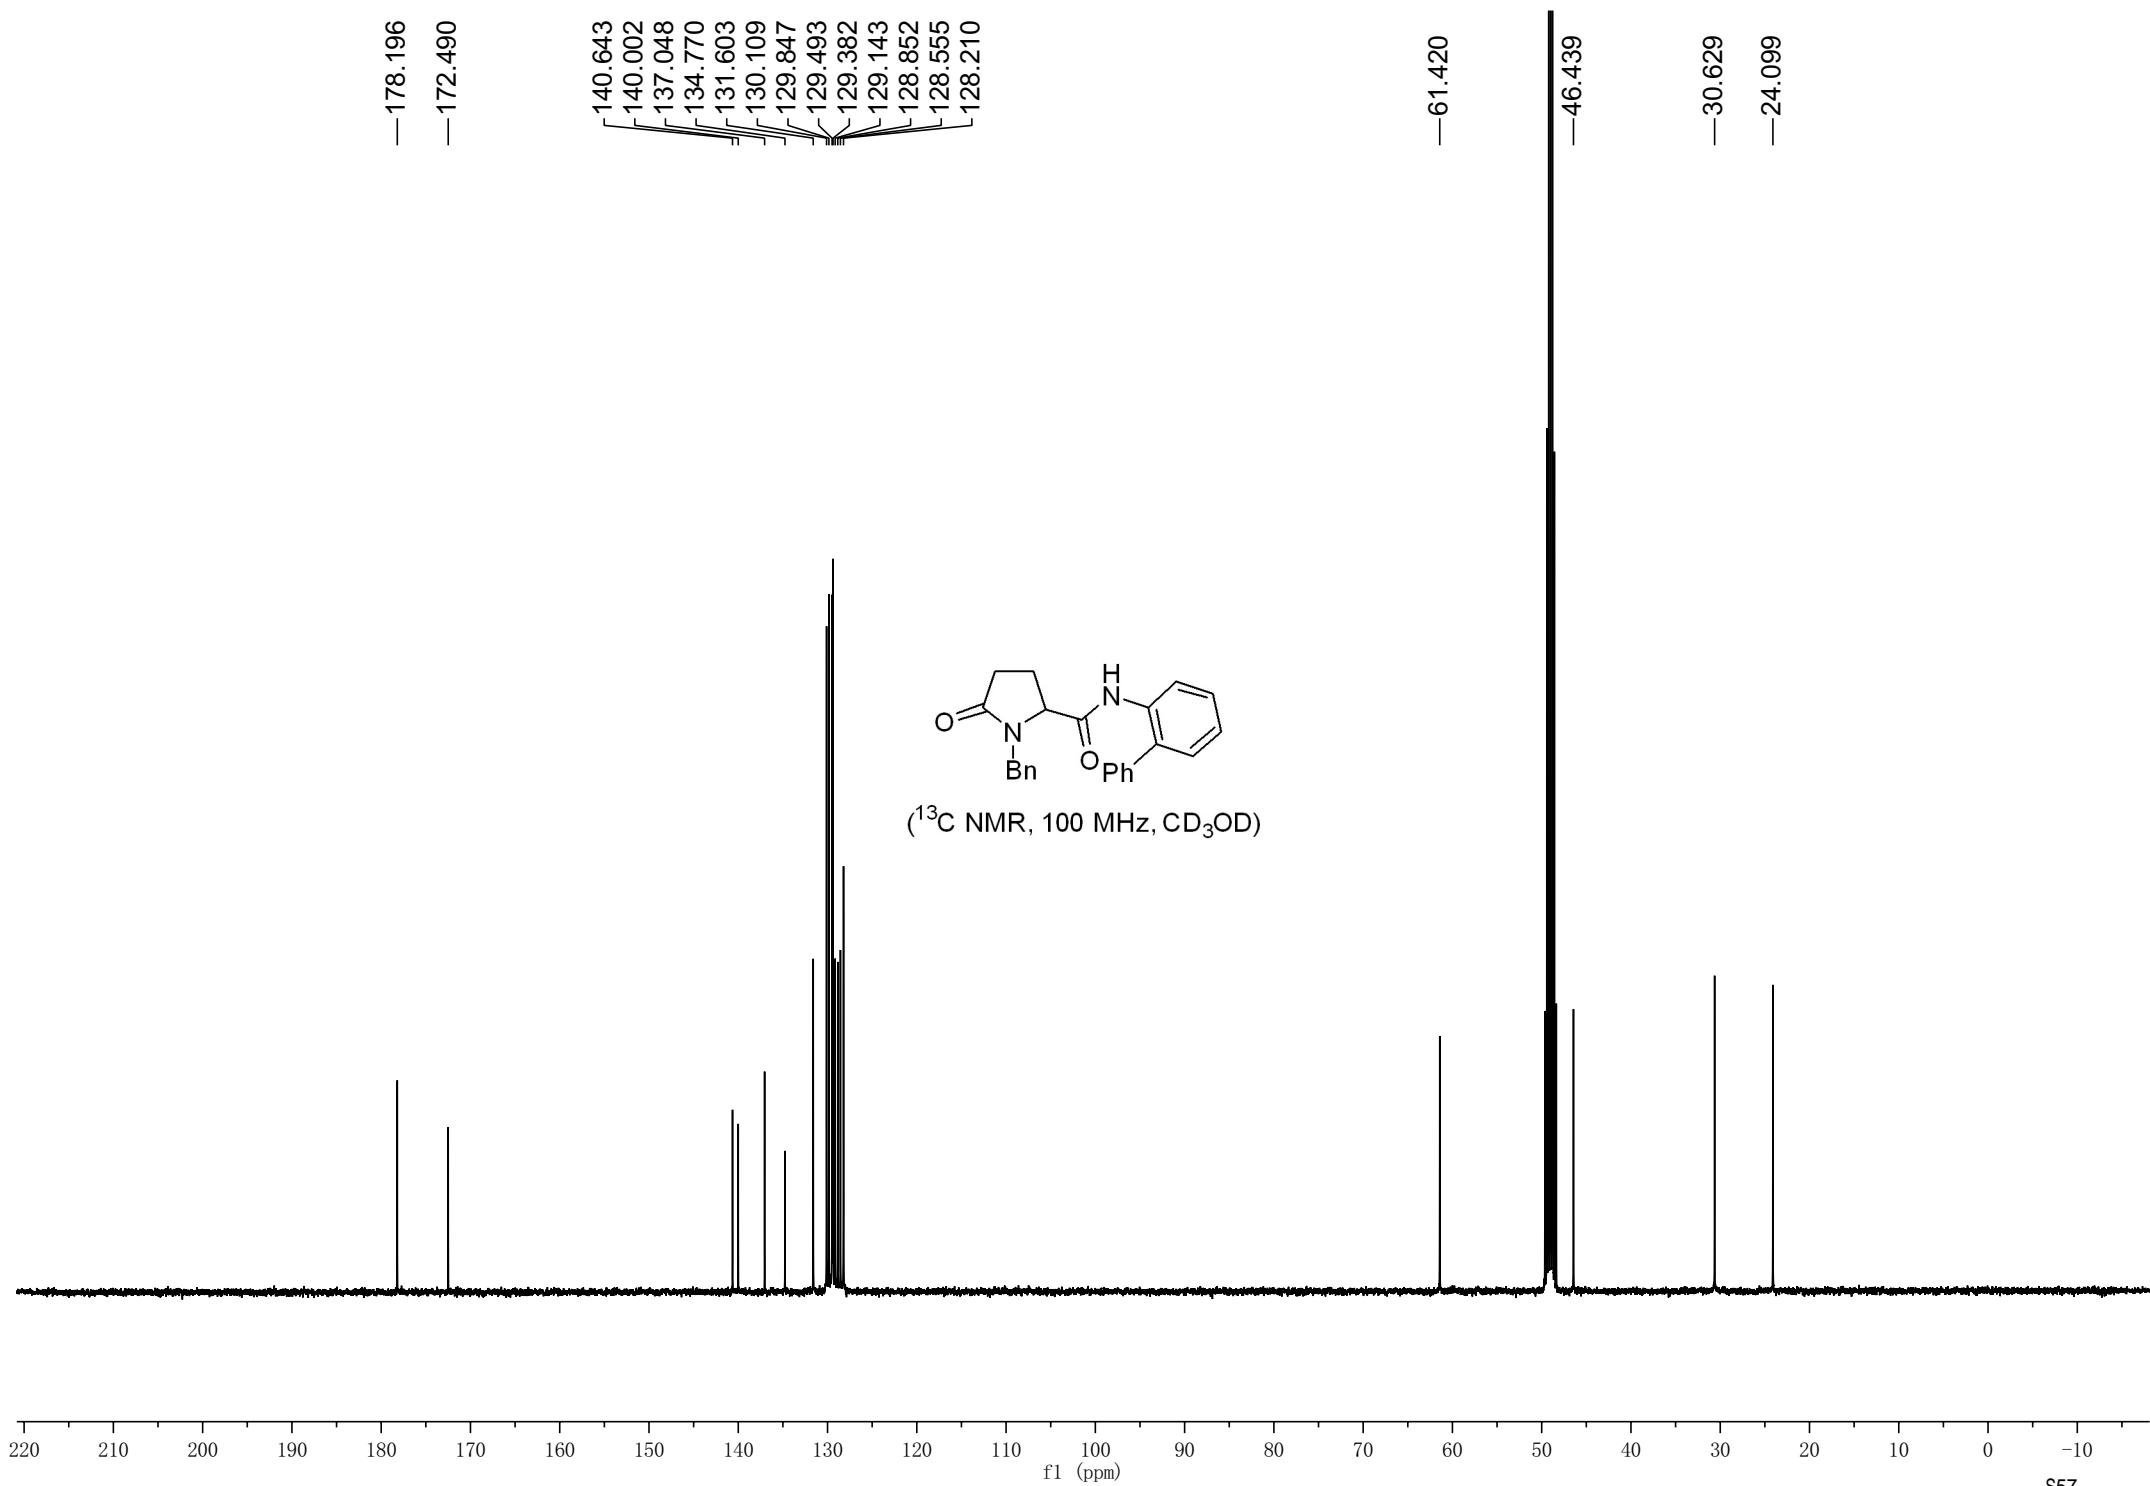

7.349  
7.332  
7.314  
7.298  
7.280  
7.215  
7.198  
4.983  
4.946  
3.953  
3.943  
3.931  
3.921  
3.853  
3.816  
3.621  
3.611  
3.602  
3.584  
2.565  
2.545  
2.542  
2.522  
2.440  
2.427  
2.415  
2.402  
2.372  
2.360  
2.256  
2.246  
2.236  
2.231  
2.227  
2.224  
2.204  
1.950  
1.938  
1.926  
1.917  
1.906  
1.840  
1.812  
1.777  
1.768  
1.757  
1.746  
1.736  
1.727  
1.647  
1.638  
1.623  
1.615  
1.371  
1.362  
1.351  
1.346  
1.341  
1.331  
1.322  
1.309  
1.225  
1.217  
1.209  
1.194  
1.187  
1.163  
1.159  
1.128

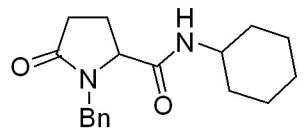

(<sup>1</sup>H NMR, 400 MHz, CD<sub>3</sub>OD)

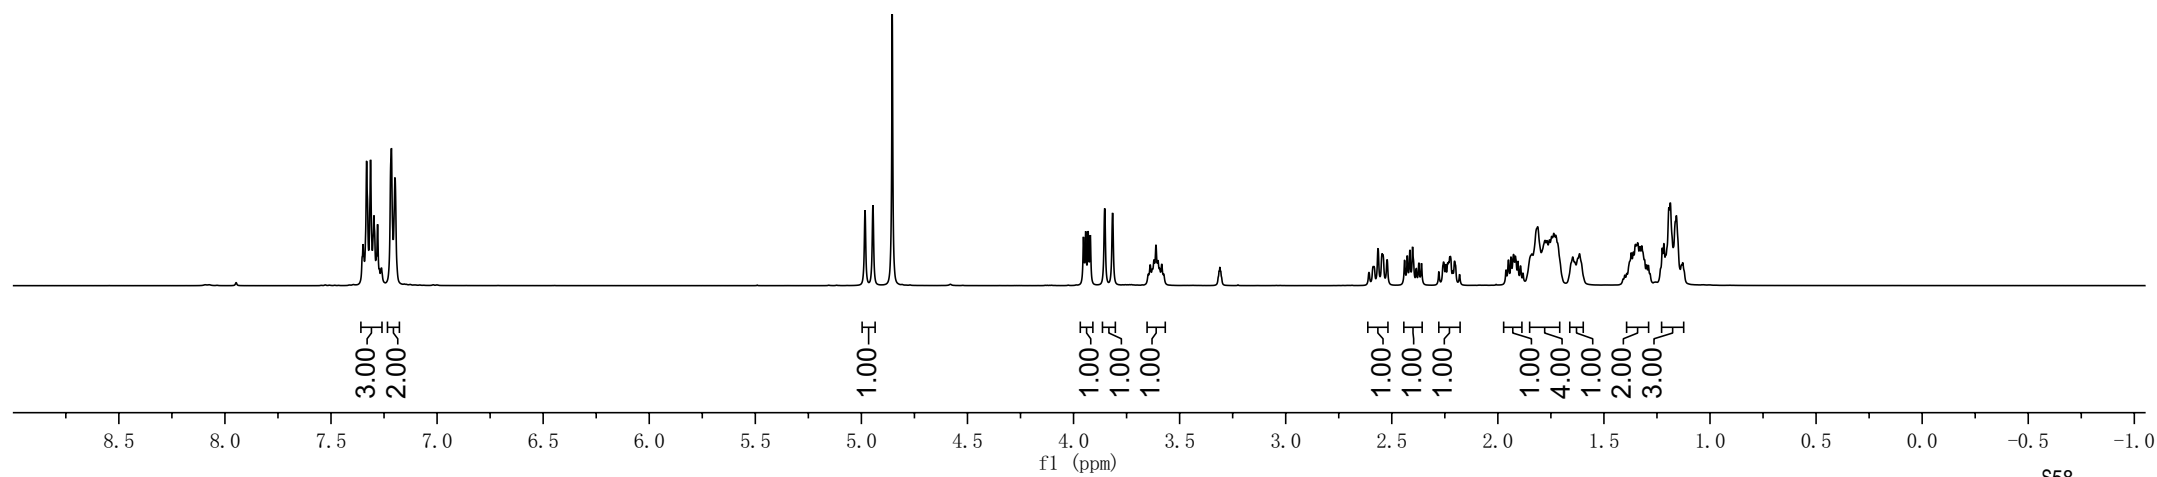

—176.851  
—170.969

135.738  
128.466  
128.050  
127.500

—60.181  
—48.494  
—45.108  
32.394  
32.084  
29.548  
25.201  
24.683  
22.869

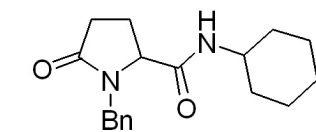

(<sup>13</sup>C NMR, 100 MHz, CD<sub>3</sub>OD)

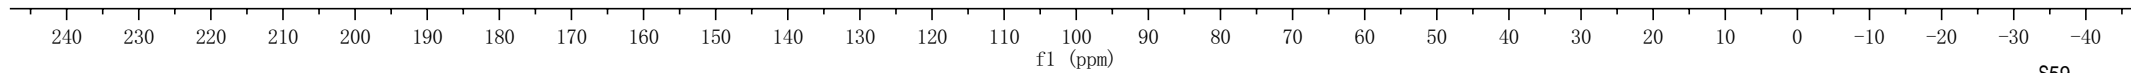



7.364  
7.347  
7.343  
7.328  
7.306  
7.303  
7.288  
7.245  
7.228

5.454  
5.416

3.972  
3.961  
3.948  
3.664  
3.627

2.521  
2.505  
2.495  
2.479  
2.473  
2.458

1.949  
1.893  
1.852  
1.844  
1.806  
1.796  
1.785  
1.772  
1.762  
1.752  
1.743  
1.738  
1.384  
1.373  
1.363  
1.354  
1.252  
1.244  
1.222  
1.214  
1.192  
1.186

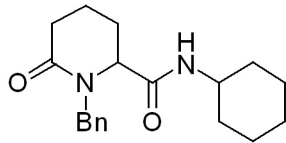

(<sup>1</sup>H NMR, 400 MHz, CD<sub>3</sub>OD)

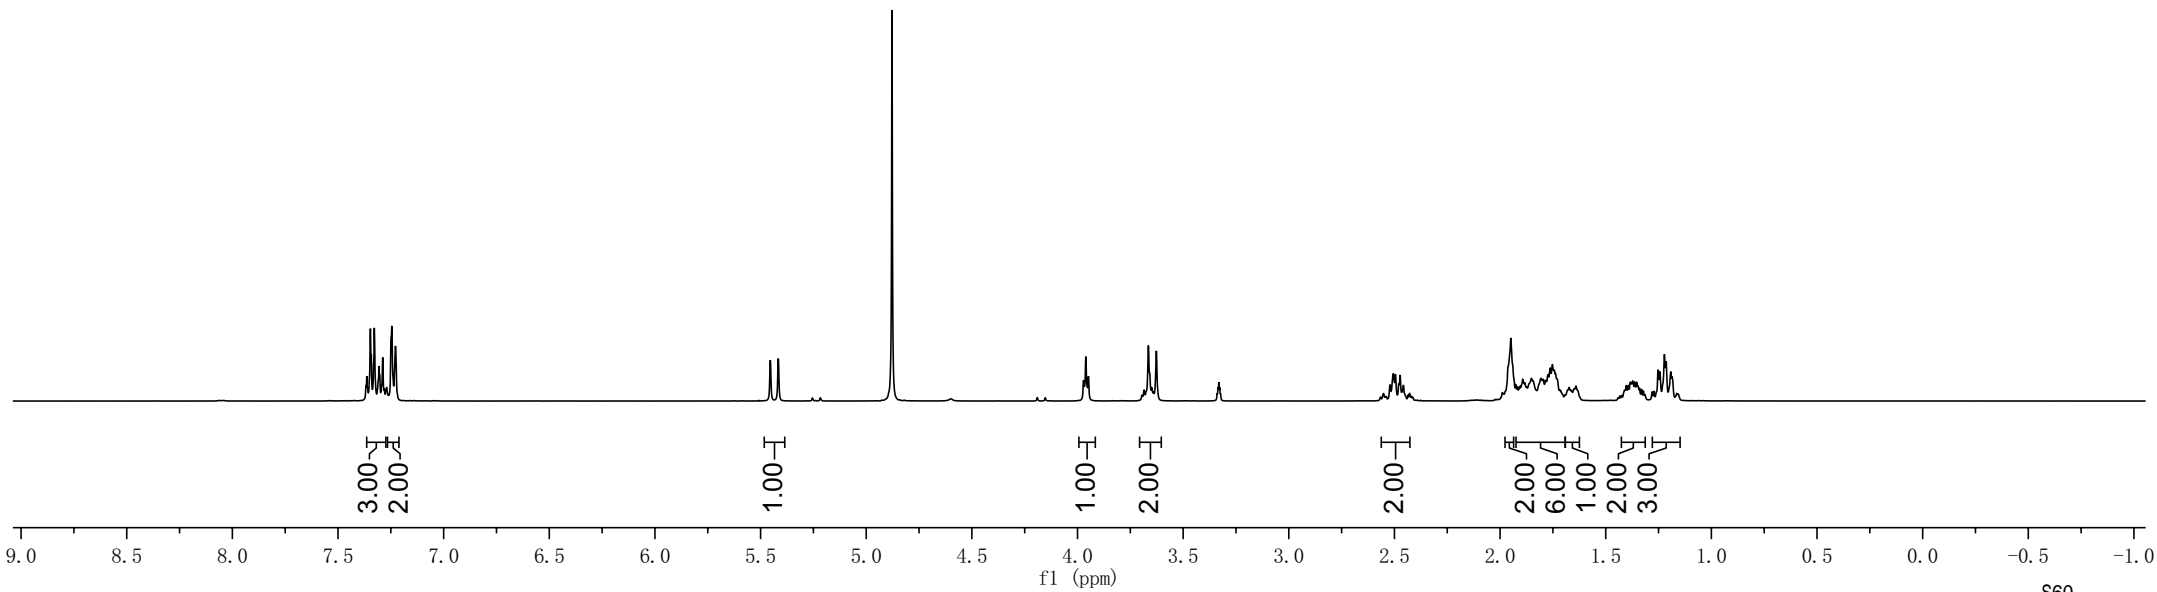

173.471  
172.175

137.898  
129.727  
129.168  
128.627

60.586  
50.009  
49.863  
33.719  
33.541  
32.726  
28.410  
26.565  
26.078  
26.038  
19.051

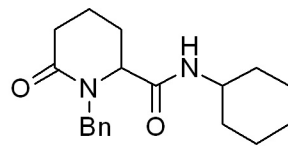

(<sup>13</sup>C NMR, 100 MHz, CD<sub>3</sub>OD)

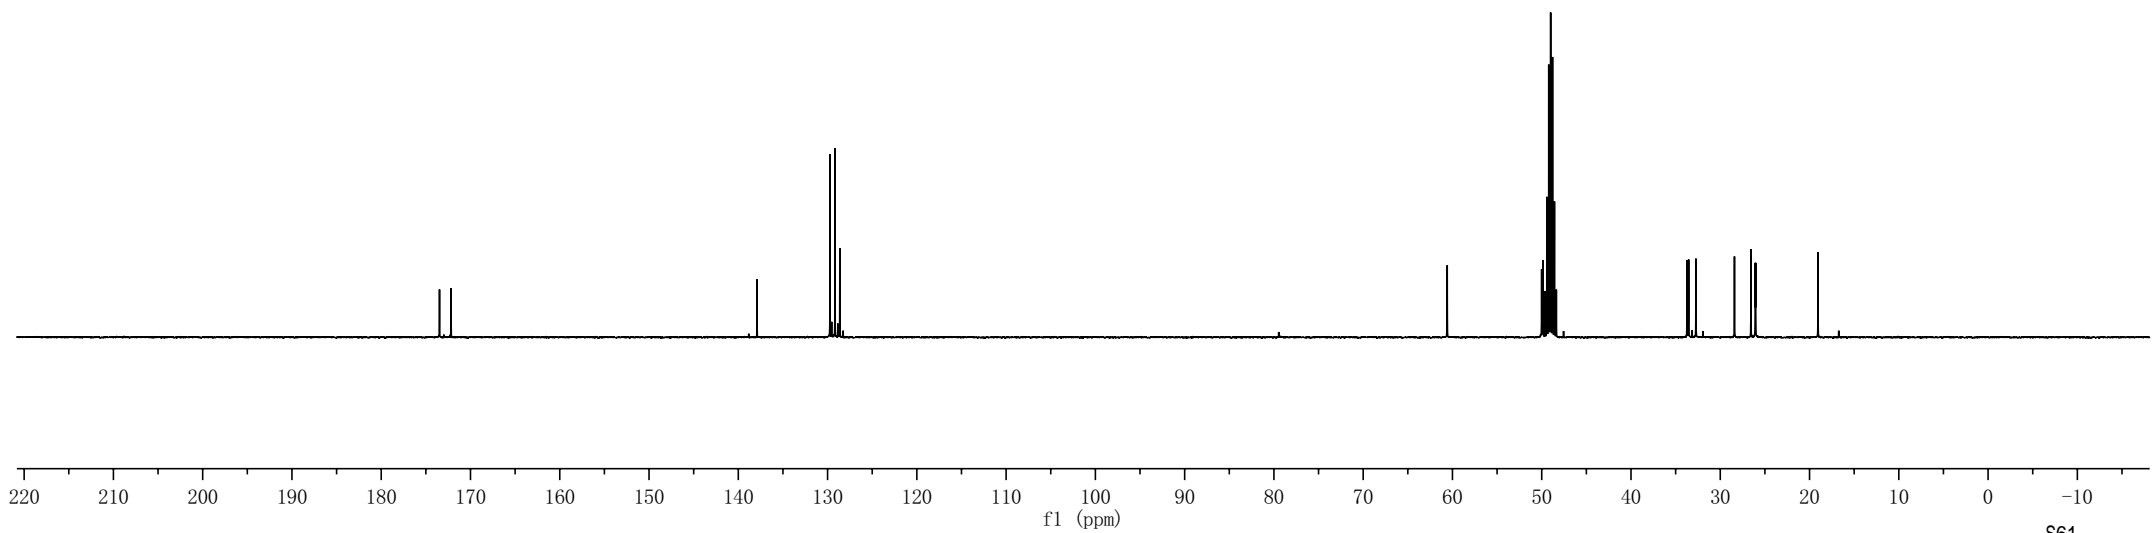

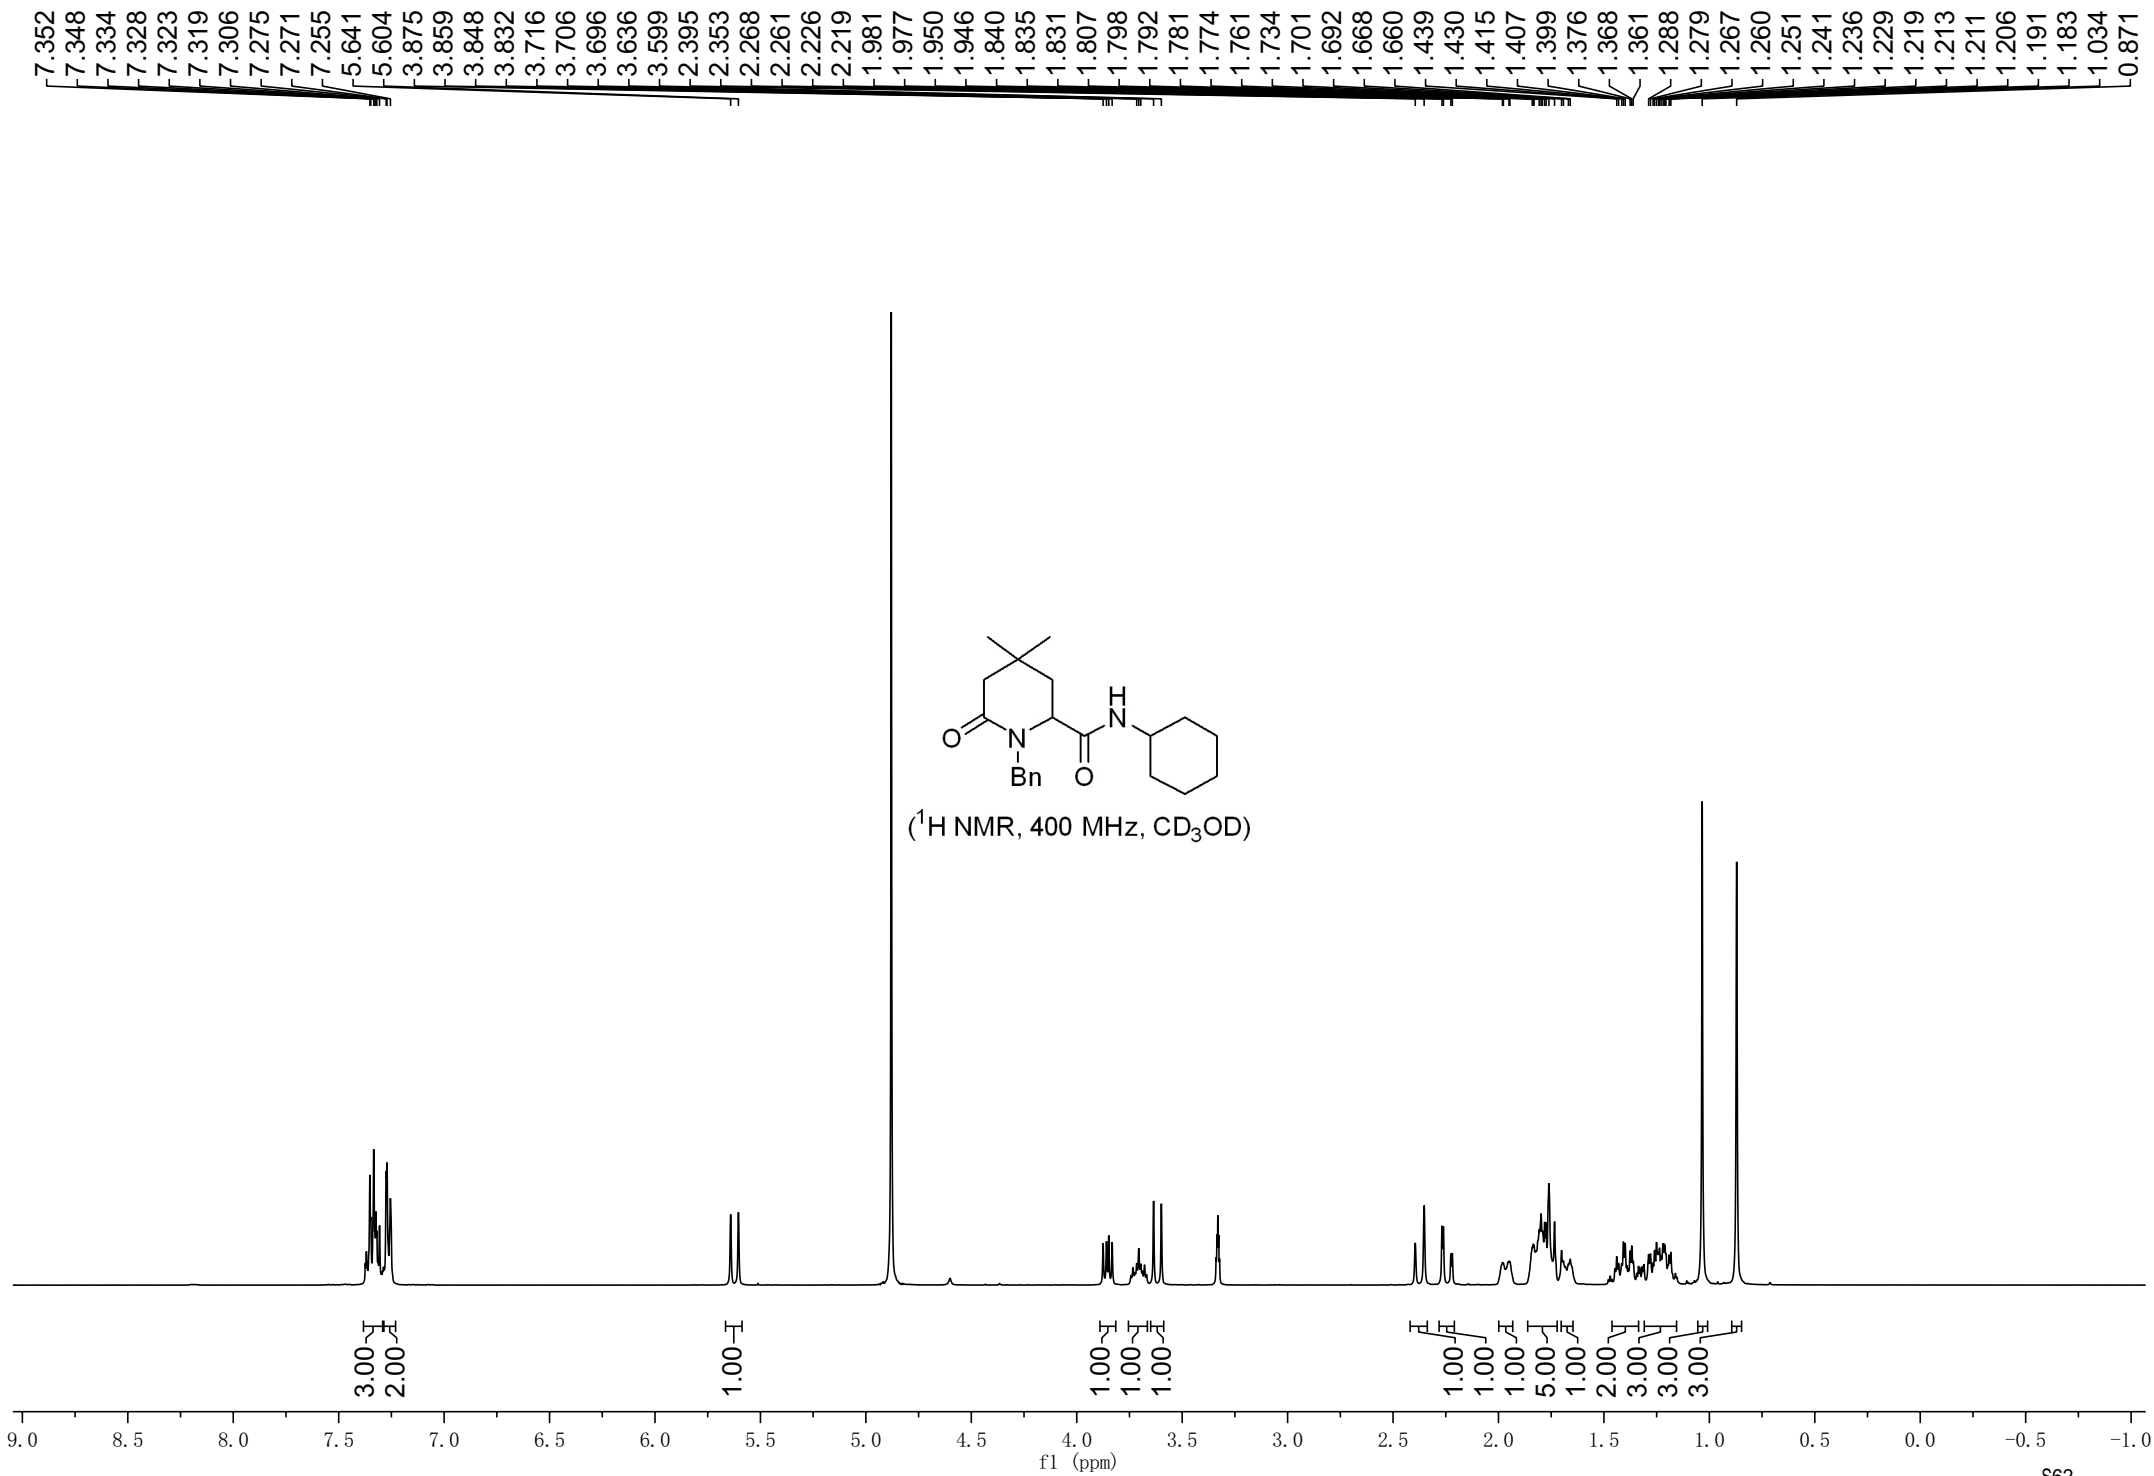

173.015  
172.539

137.805  
129.793  
129.725  
128.880

59.338

49.995  
48.314  
46.433  
40.804  
33.799  
33.450  
30.917  
30.522  
26.562  
26.096  
26.049  
24.651

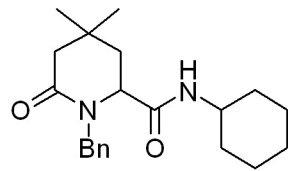

(<sup>13</sup>C NMR, 100 MHz, CD<sub>3</sub>OD)

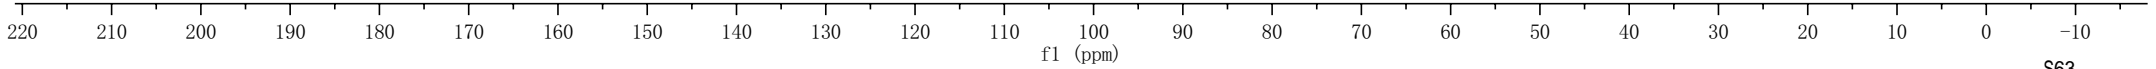

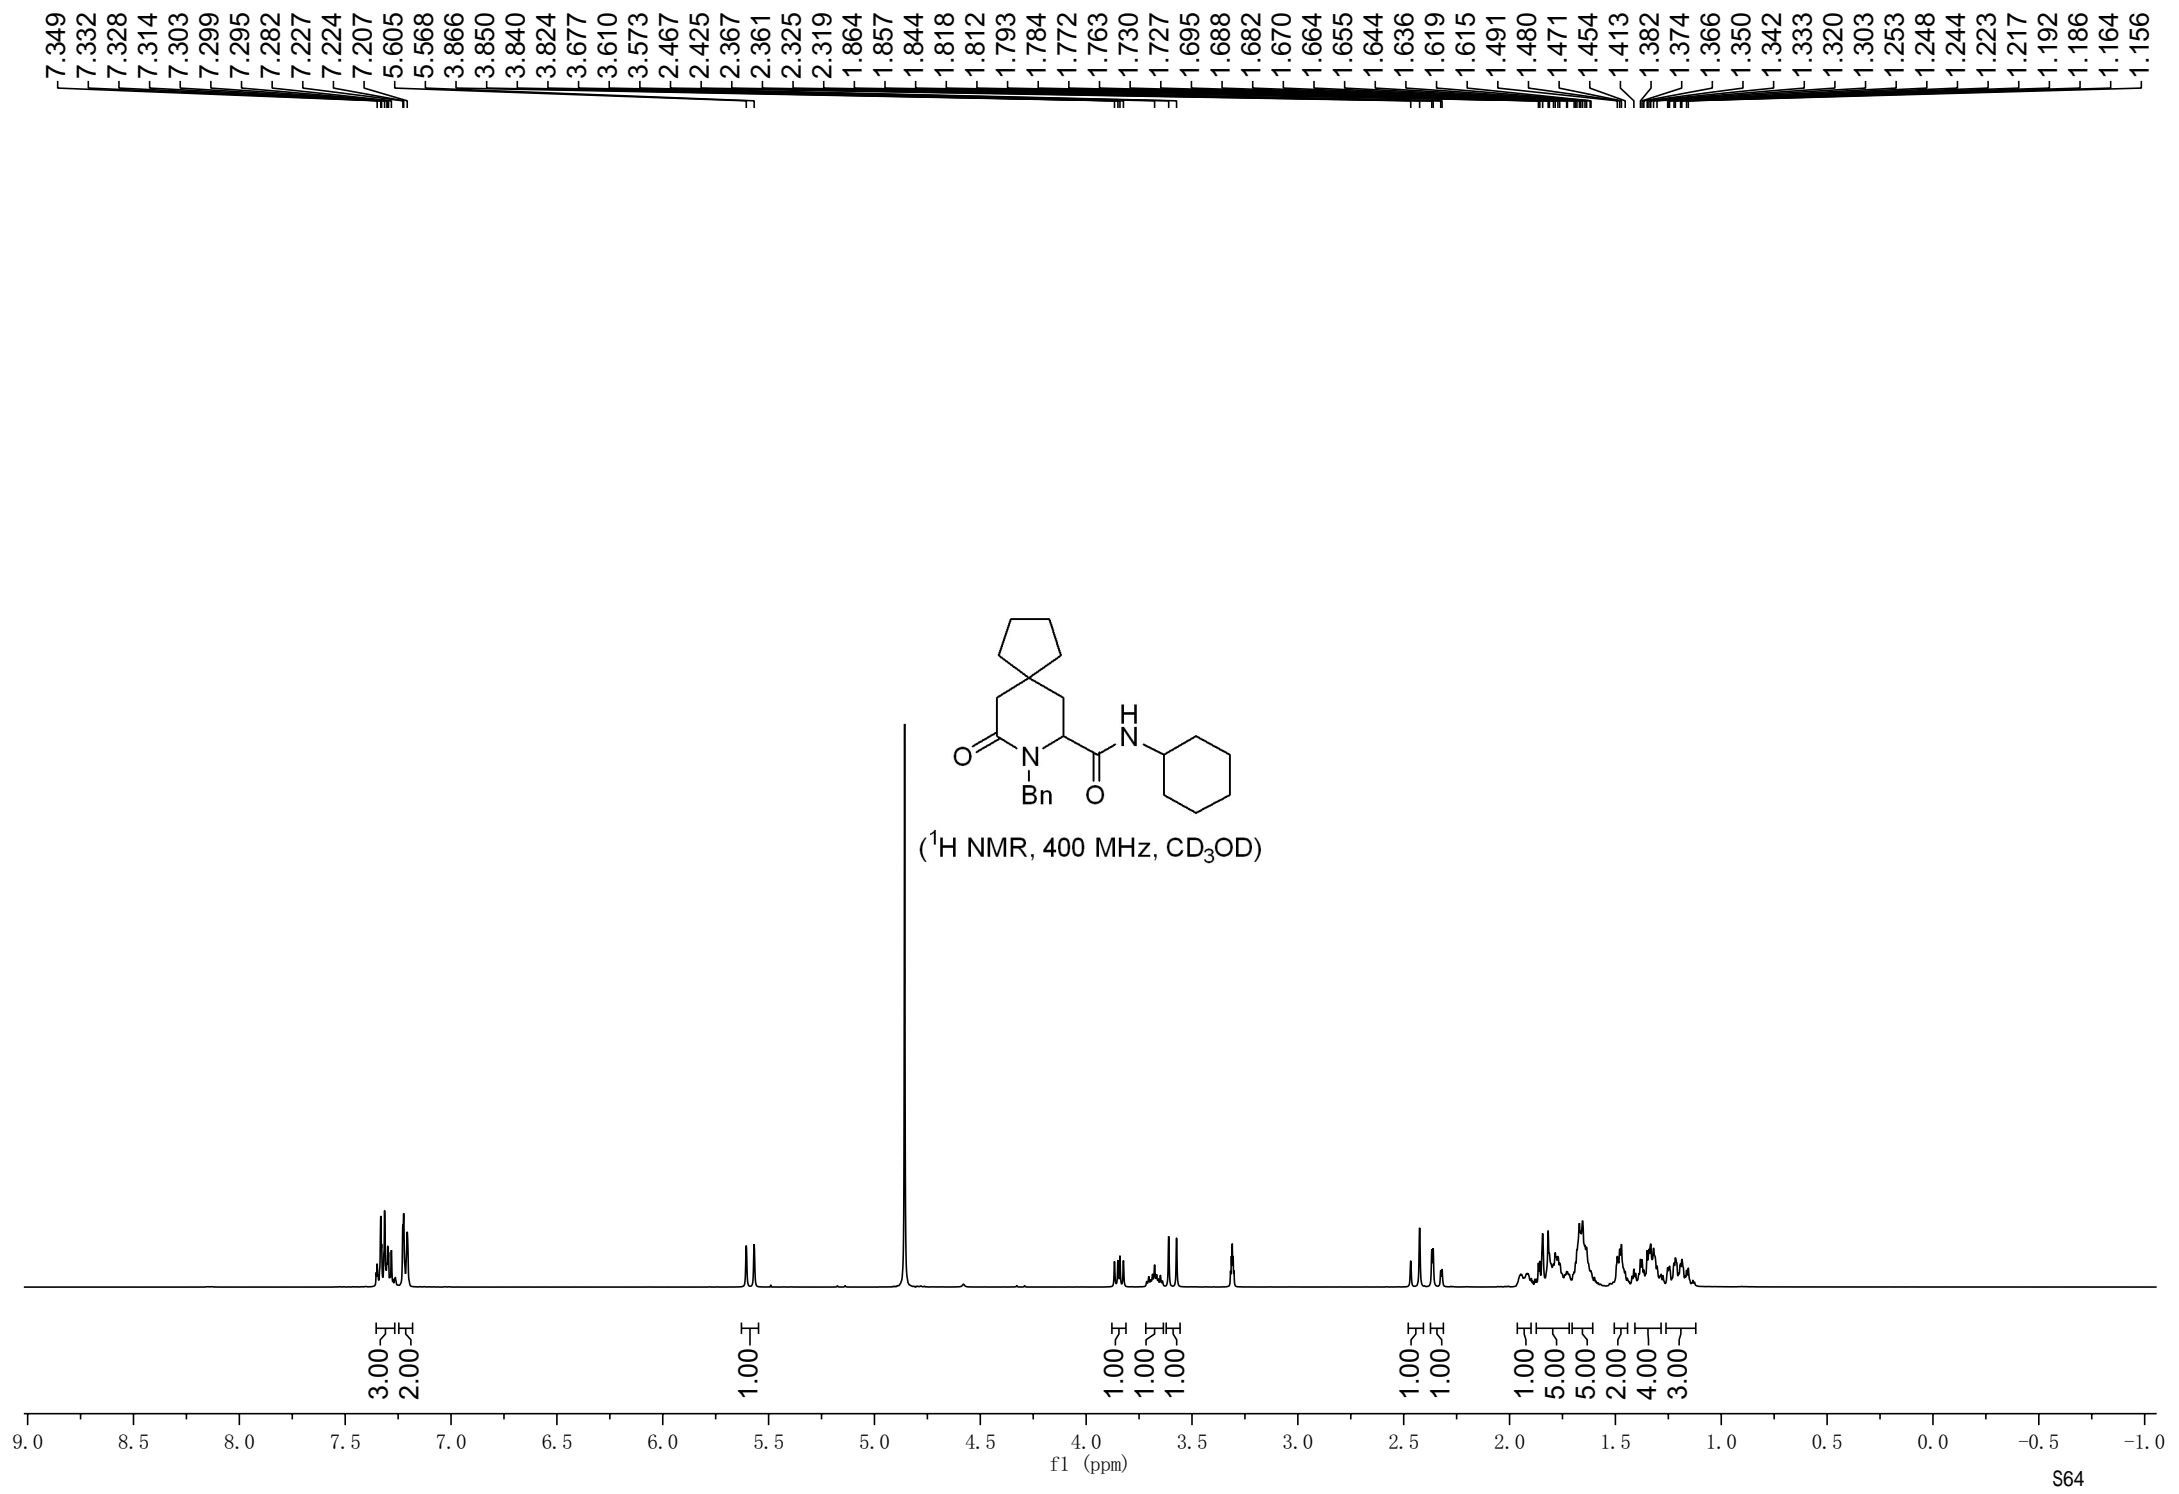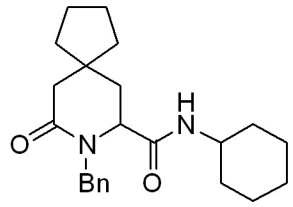

(<sup>1</sup>H NMR, 400 MHz, CD<sub>3</sub>OD)

173.277  
172.516

137.809  
129.724  
129.562  
128.806

59.767  
49.986  
45.216  
42.037  
40.791  
39.241  
35.752  
33.803  
33.455  
26.562  
26.093  
26.051  
25.466  
24.760

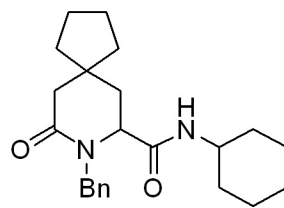

(<sup>13</sup>C NMR, 100 MHz, CD<sub>3</sub>OD)

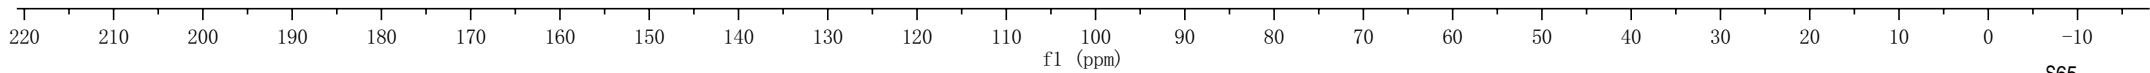

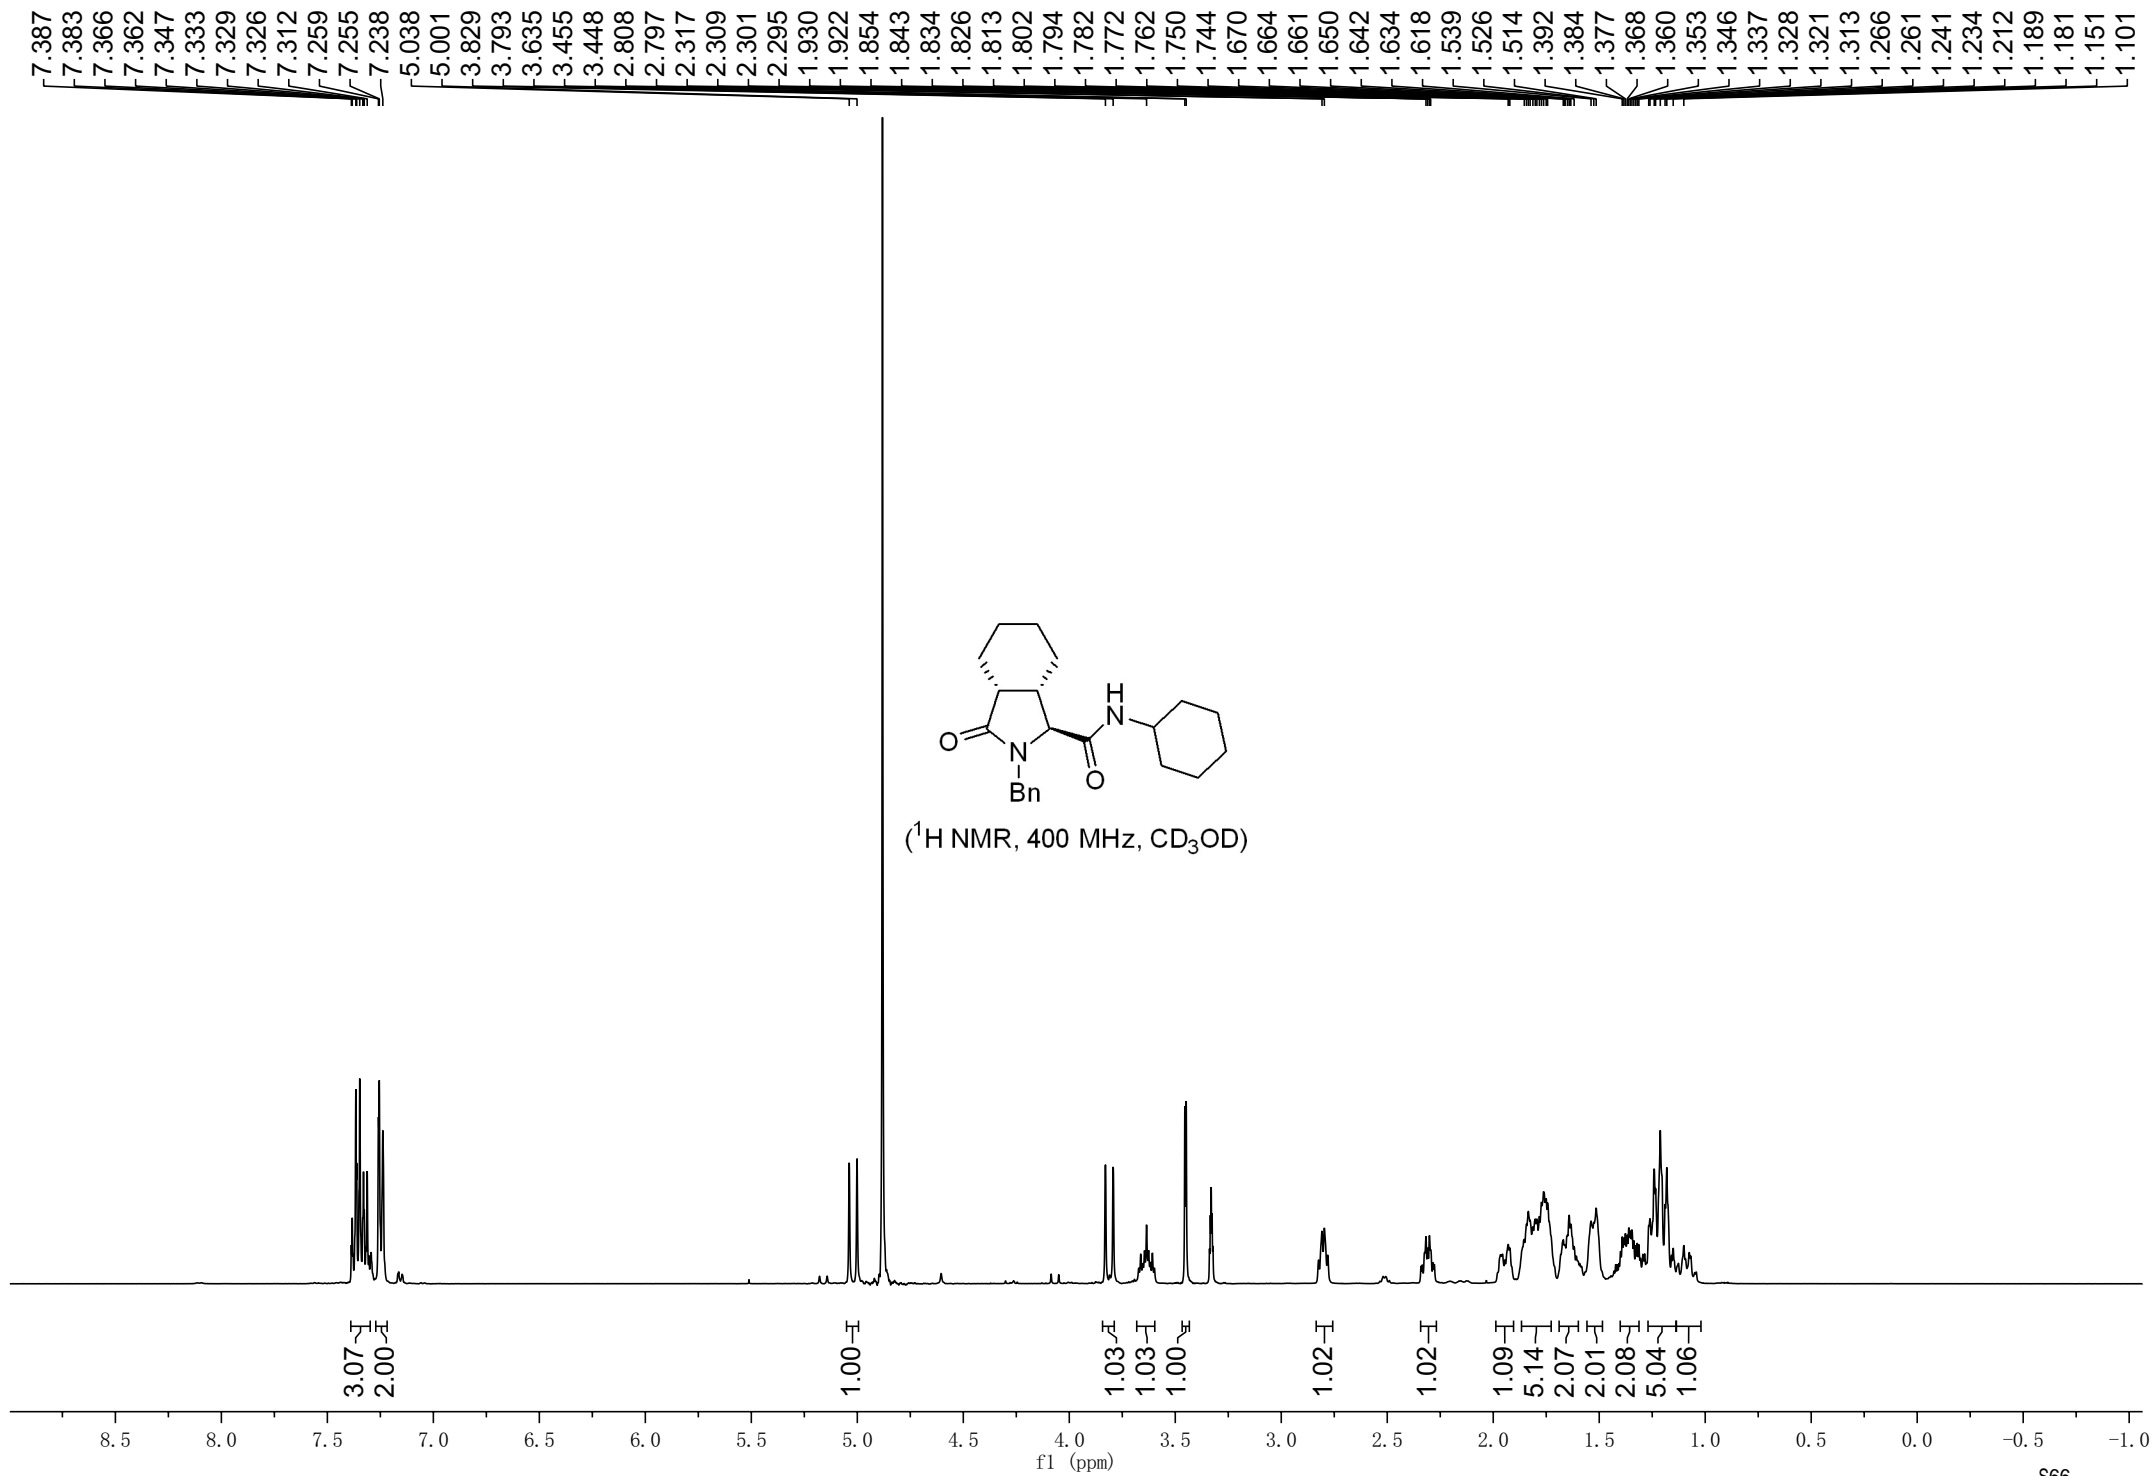

—178.997  
—171.392

—137.290  
—129.878  
—129.746  
—128.968

—65.600

49.975  
46.848  
44.682  
39.511  
33.796  
33.625  
29.081  
26.599  
26.146  
24.512  
24.387  
23.975

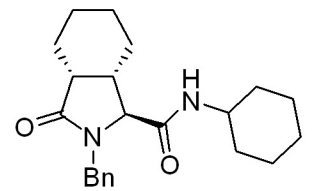

(<sup>13</sup>C NMR, 100 MHz, CD<sub>3</sub>OD)

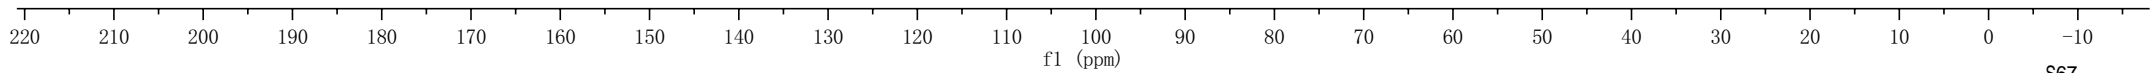



4.313  
4.197  
4.176  
3.679  
3.670  
3.660  
3.587  
3.575  
3.559  
3.547  
3.481  
2.453  
2.438  
2.416  
2.405  
1.944  
1.907  
1.874  
1.787  
1.761  
1.644  
1.457  
1.406  
1.375  
1.350  
1.344  
1.320  
1.311  
1.298  
1.289  
1.277  
1.272  
1.262  
1.254  
1.247  
1.224  
1.217

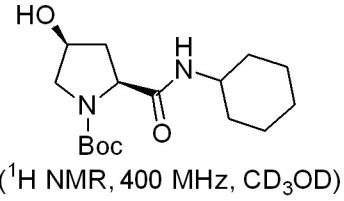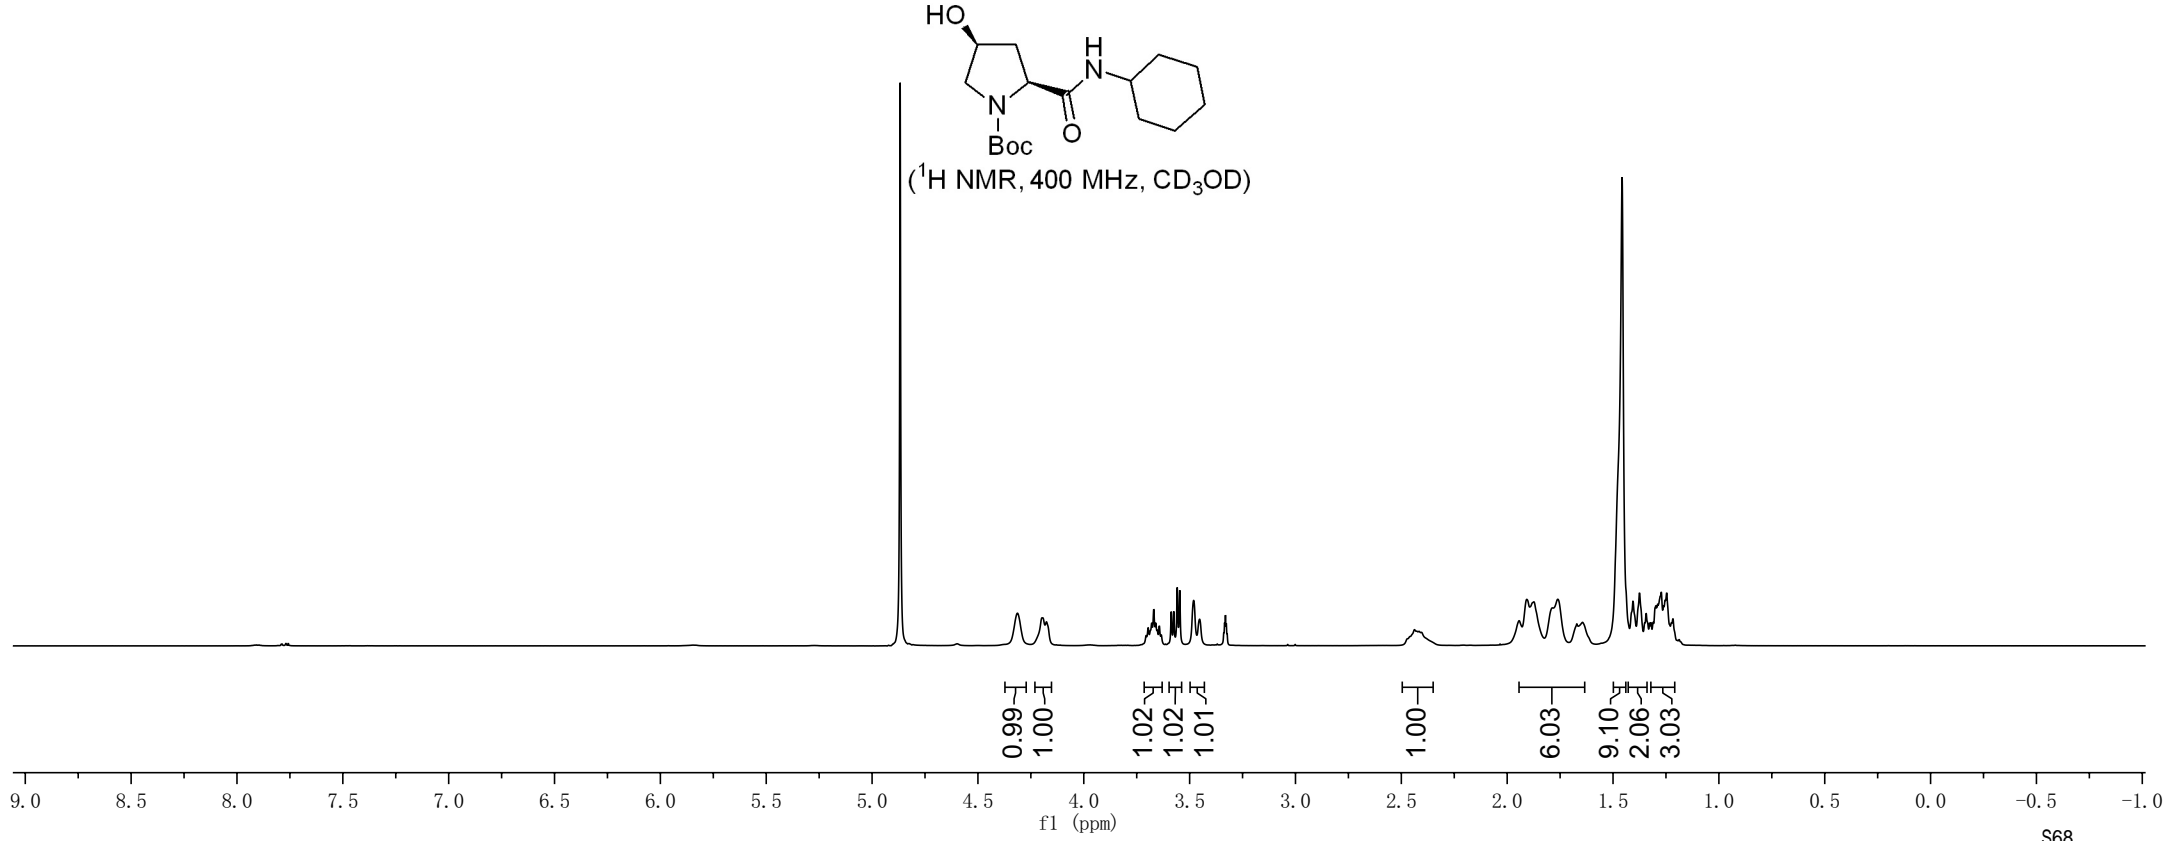

174.976  
174.683

156.384  
156.085

81.799  
81.510

71.272  
70.482

61.514  
56.780  
56.197

39.878  
38.907  
33.672  
28.721  
26.643  
26.049

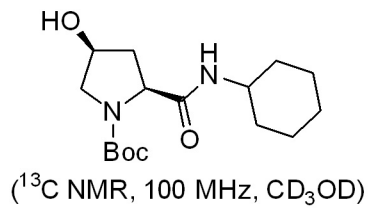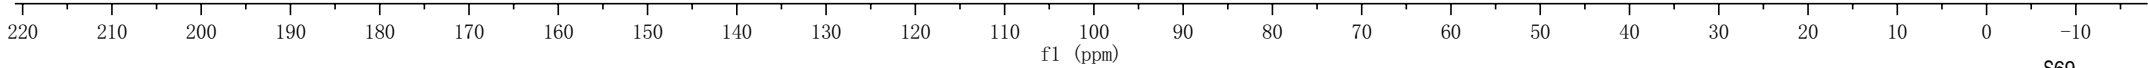

4.294  
4.147  
4.127  
3.567  
3.556  
3.539  
3.528  
3.484  
3.459  
2.455  
2.443  
2.421  
2.398  
2.386  
2.356  
1.928  
1.895  
1.478  
1.373

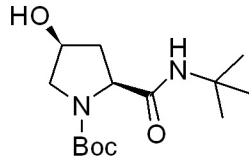

(<sup>1</sup>H NMR, 400 MHz, CD<sub>3</sub>OD)

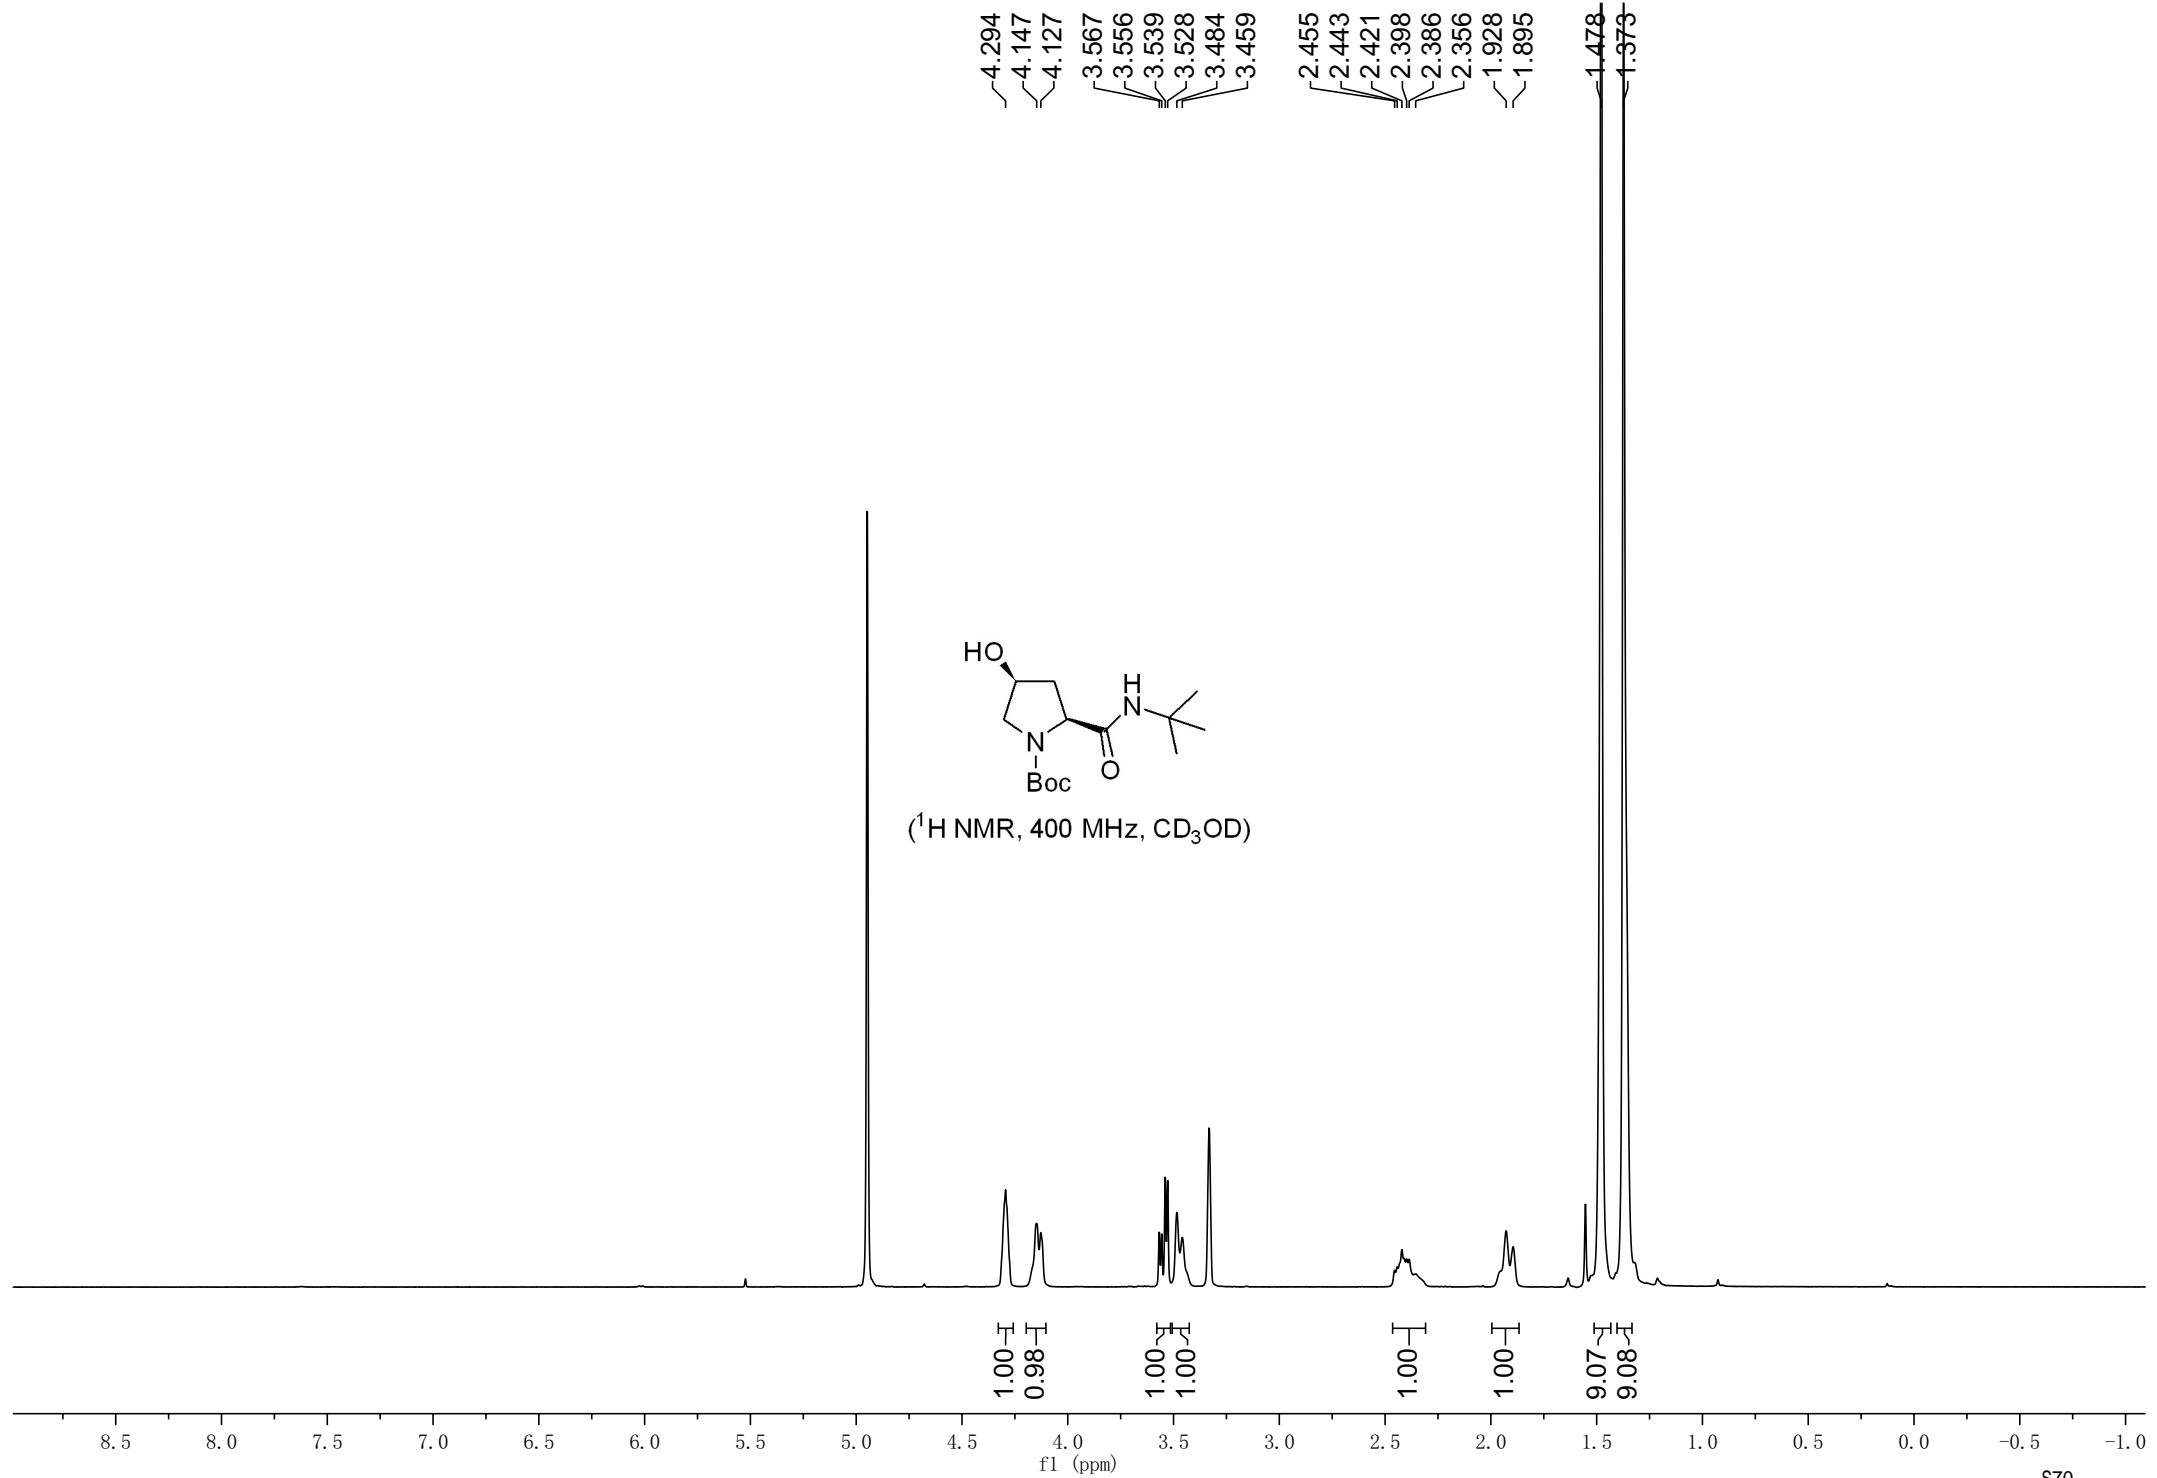

175.216  
174.885

156.312  
156.111

81.770  
81.510

71.320  
70.518

61.408  
56.797  
56.277  
52.070

39.671  
38.705  
30.329  
28.811  
28.671

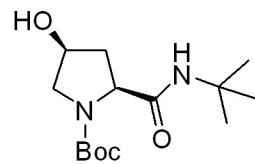

(<sup>13</sup>C NMR, 100 MHz, CD<sub>3</sub>OD)

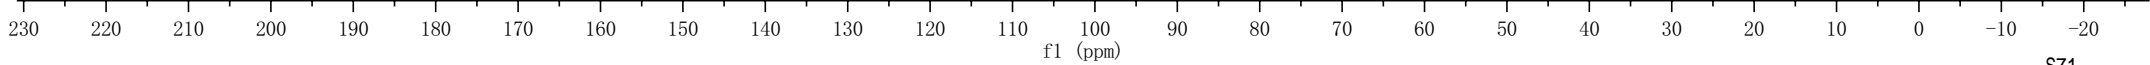

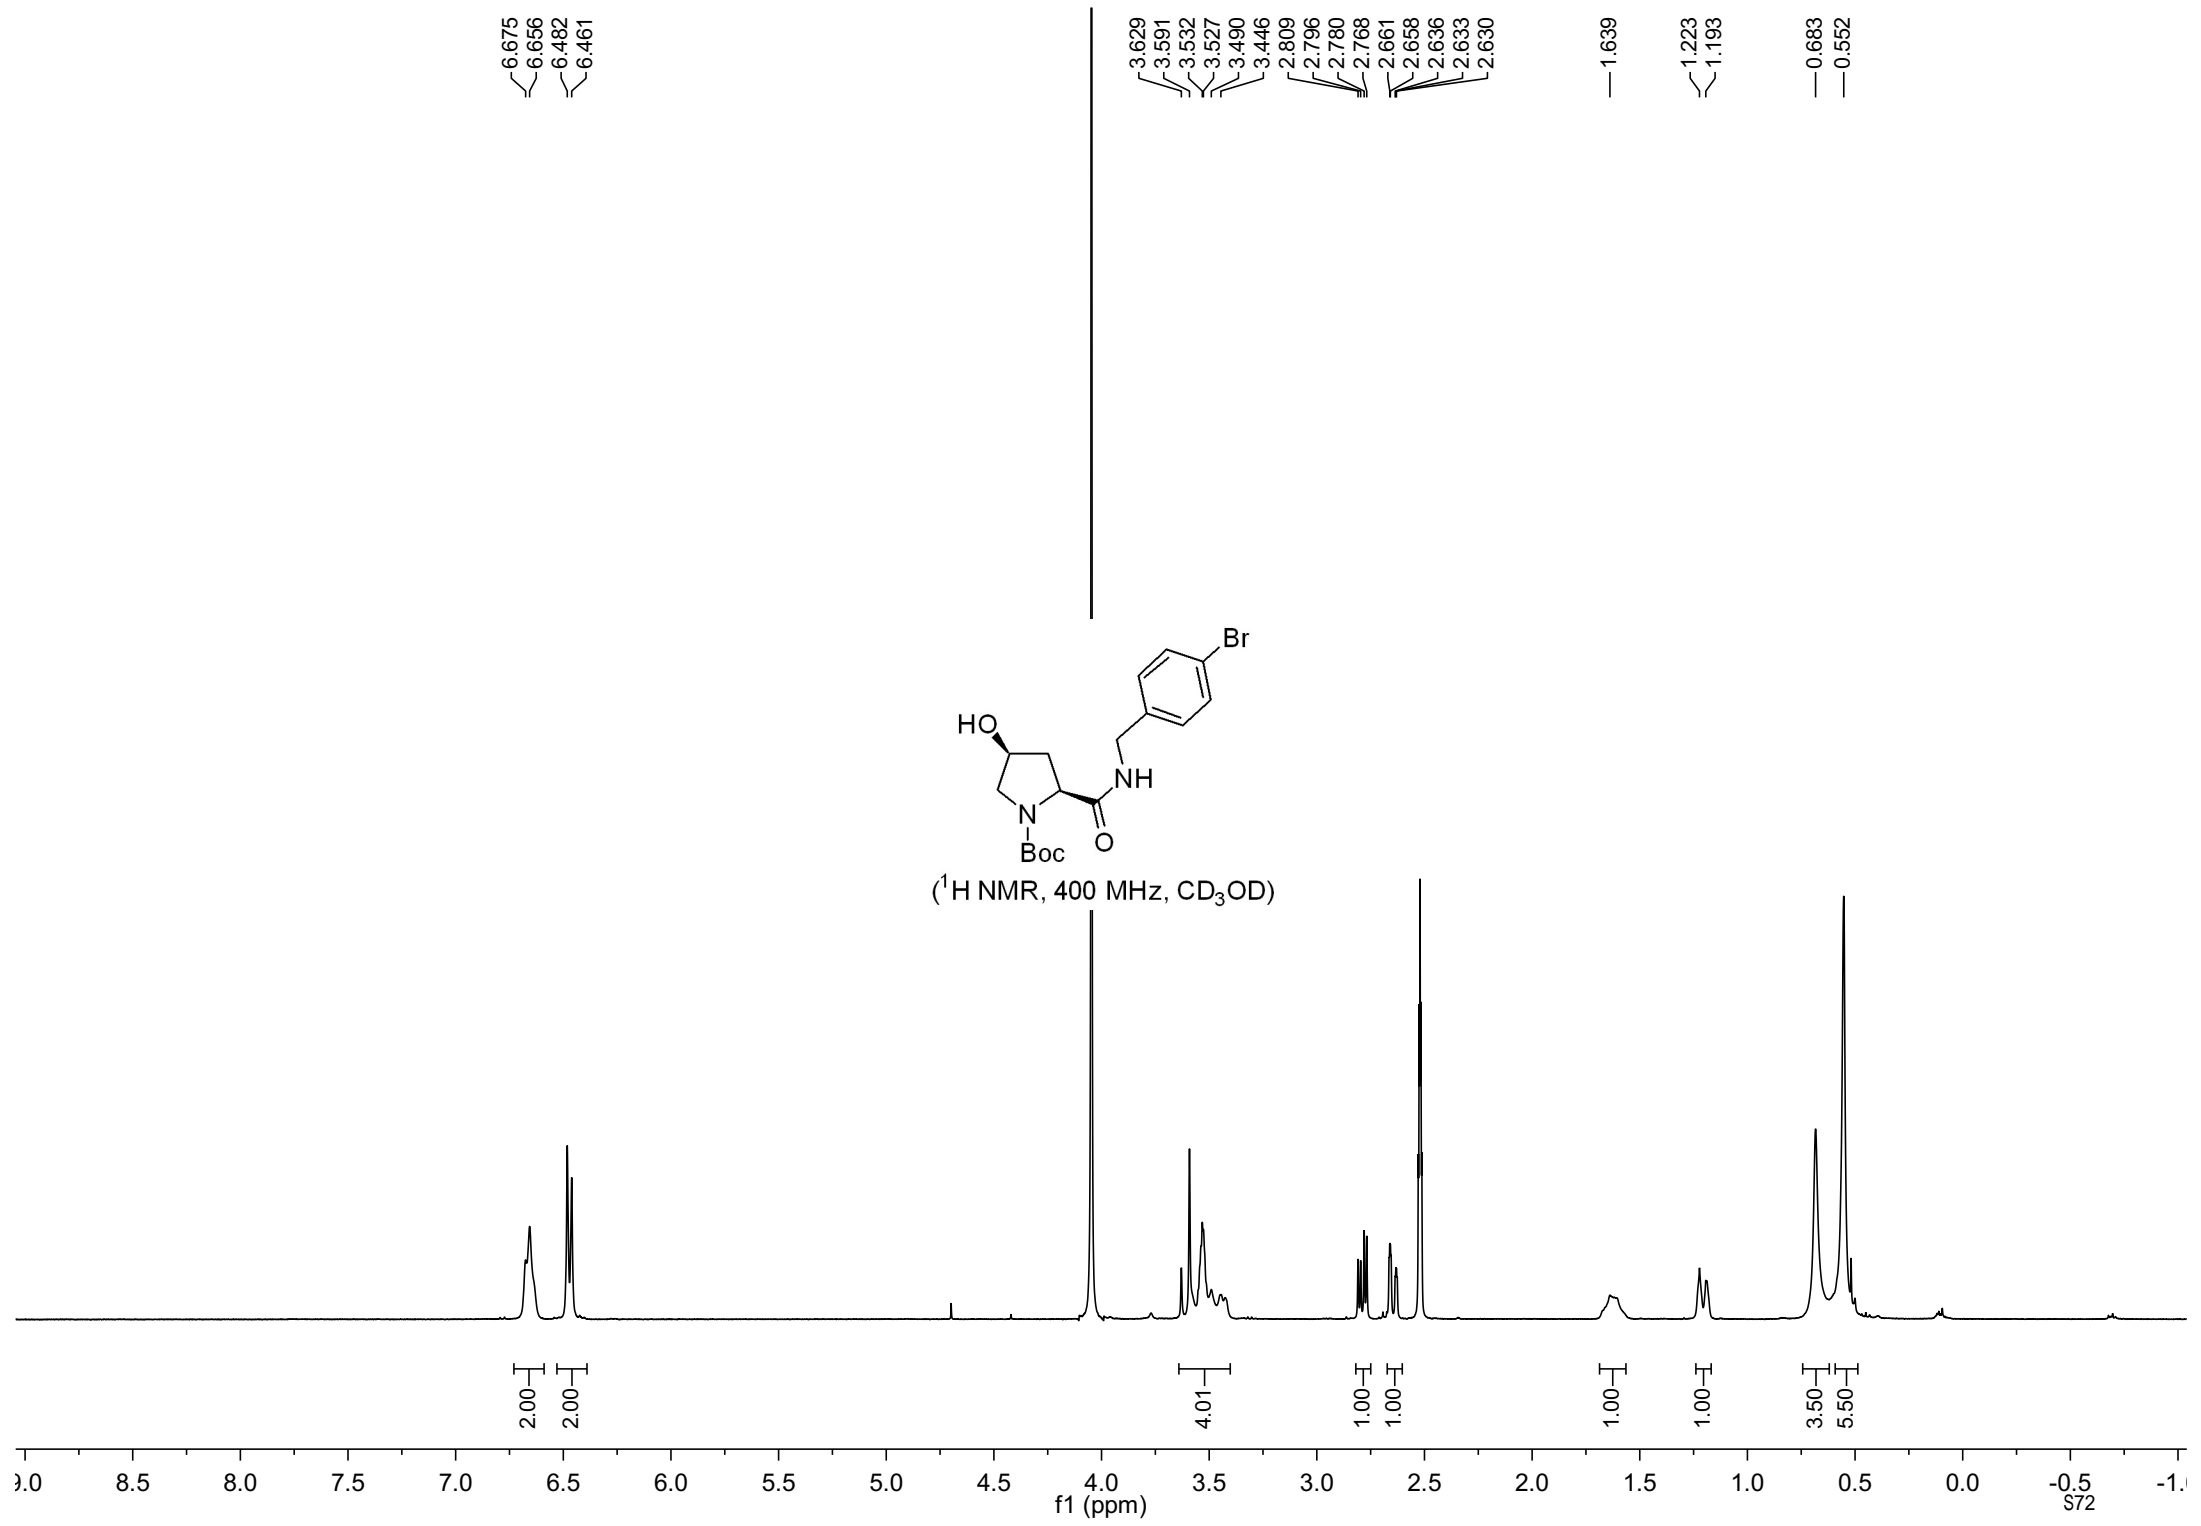

— 173.095

— 151.273

— 136.545

129.840

128.213

127.580

79.132

78.454

68.483

67.657

58.507

58.389

53.869

53.350

40.806

40.694

37.164

36.221

— 25.834

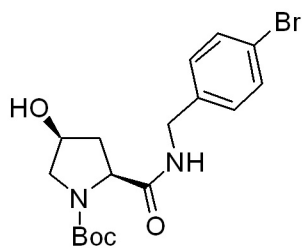

(<sup>13</sup>C NMR, 100 MHz, CD<sub>3</sub>OD)

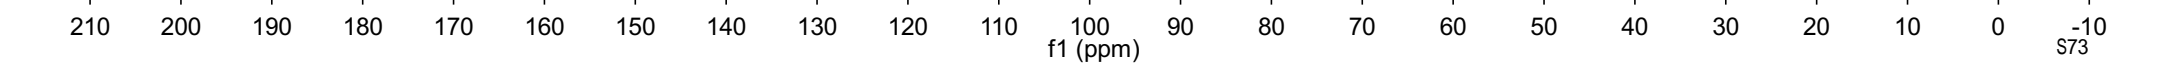

7.378  
7.373  
7.369  
7.365  
7.360  
7.350  
7.344  
7.340  
7.279  
7.260  
7.185  
7.179  
7.167  
7.160

5.064  
4.930  
4.488  
4.485  
4.463  
4.460  
4.044  
4.031  
4.020

2.457  
2.445  
2.433  
2.421  
2.409  
2.398  
2.384  
2.373

1.846  
1.843  
1.806  
1.415  
1.390  
1.214

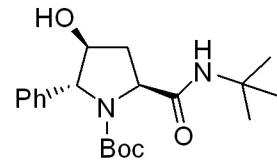

(<sup>1</sup>H NMR, 400 MHz, CD<sub>3</sub>OD)

2.01  
1.02  
2.01

0.59  
0.41

0.41  
0.59

1.00

1.01

1.01

5.31  
5.31  
3.69  
3.69

9.0 8.5 8.0 7.5 7.0 6.5 6.0 5.5 5.0 4.5 4.0 3.5 3.0 2.5 2.0 1.5 1.0 0.5 0.0 -0.5 -1.0

f1 (ppm)

175.599  
175.079

156.020  
155.657

142.530  
141.413  
129.777  
129.675  
128.392  
128.362  
126.461  
126.301

82.214  
81.456  
79.369  
78.788  
73.711  
73.126  
62.820  
62.675

52.306  
52.262

36.331  
35.566  
28.865  
28.761  
28.711  
28.358

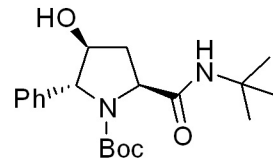

(<sup>13</sup>C NMR, 100 MHz, CD<sub>3</sub>OD)

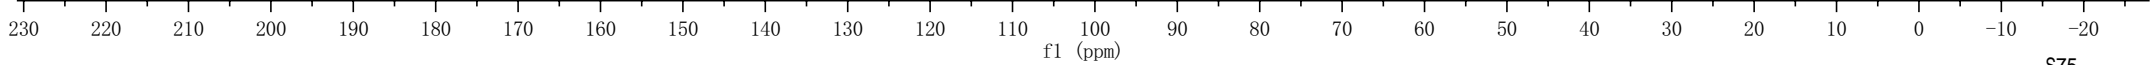



7.514  
7.493  
7.475  
7.454  
7.393  
7.375  
7.356  
7.338  
7.331  
7.321  
7.310  
7.301  
7.285  
7.279  
7.276  
7.267  
7.258  
7.193  
7.174

5.064  
4.942  
4.830  
4.669  
4.665  
4.644  
4.641  
4.576  
4.553  
4.476  
4.441  
4.398  
4.361  
4.089  
4.079  
4.059  
4.049

2.552  
2.541  
2.527  
2.516  
2.505  
2.500  
2.491  
2.480  
2.475  
2.464  
2.453  
2.439  
2.428  
1.973  
1.937  
1.932  
1.893

1.357  
1.204

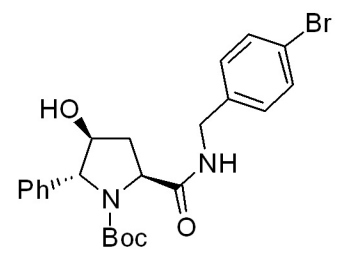

(<sup>1</sup>H NMR, 400 MHz, CD<sub>3</sub>OD)

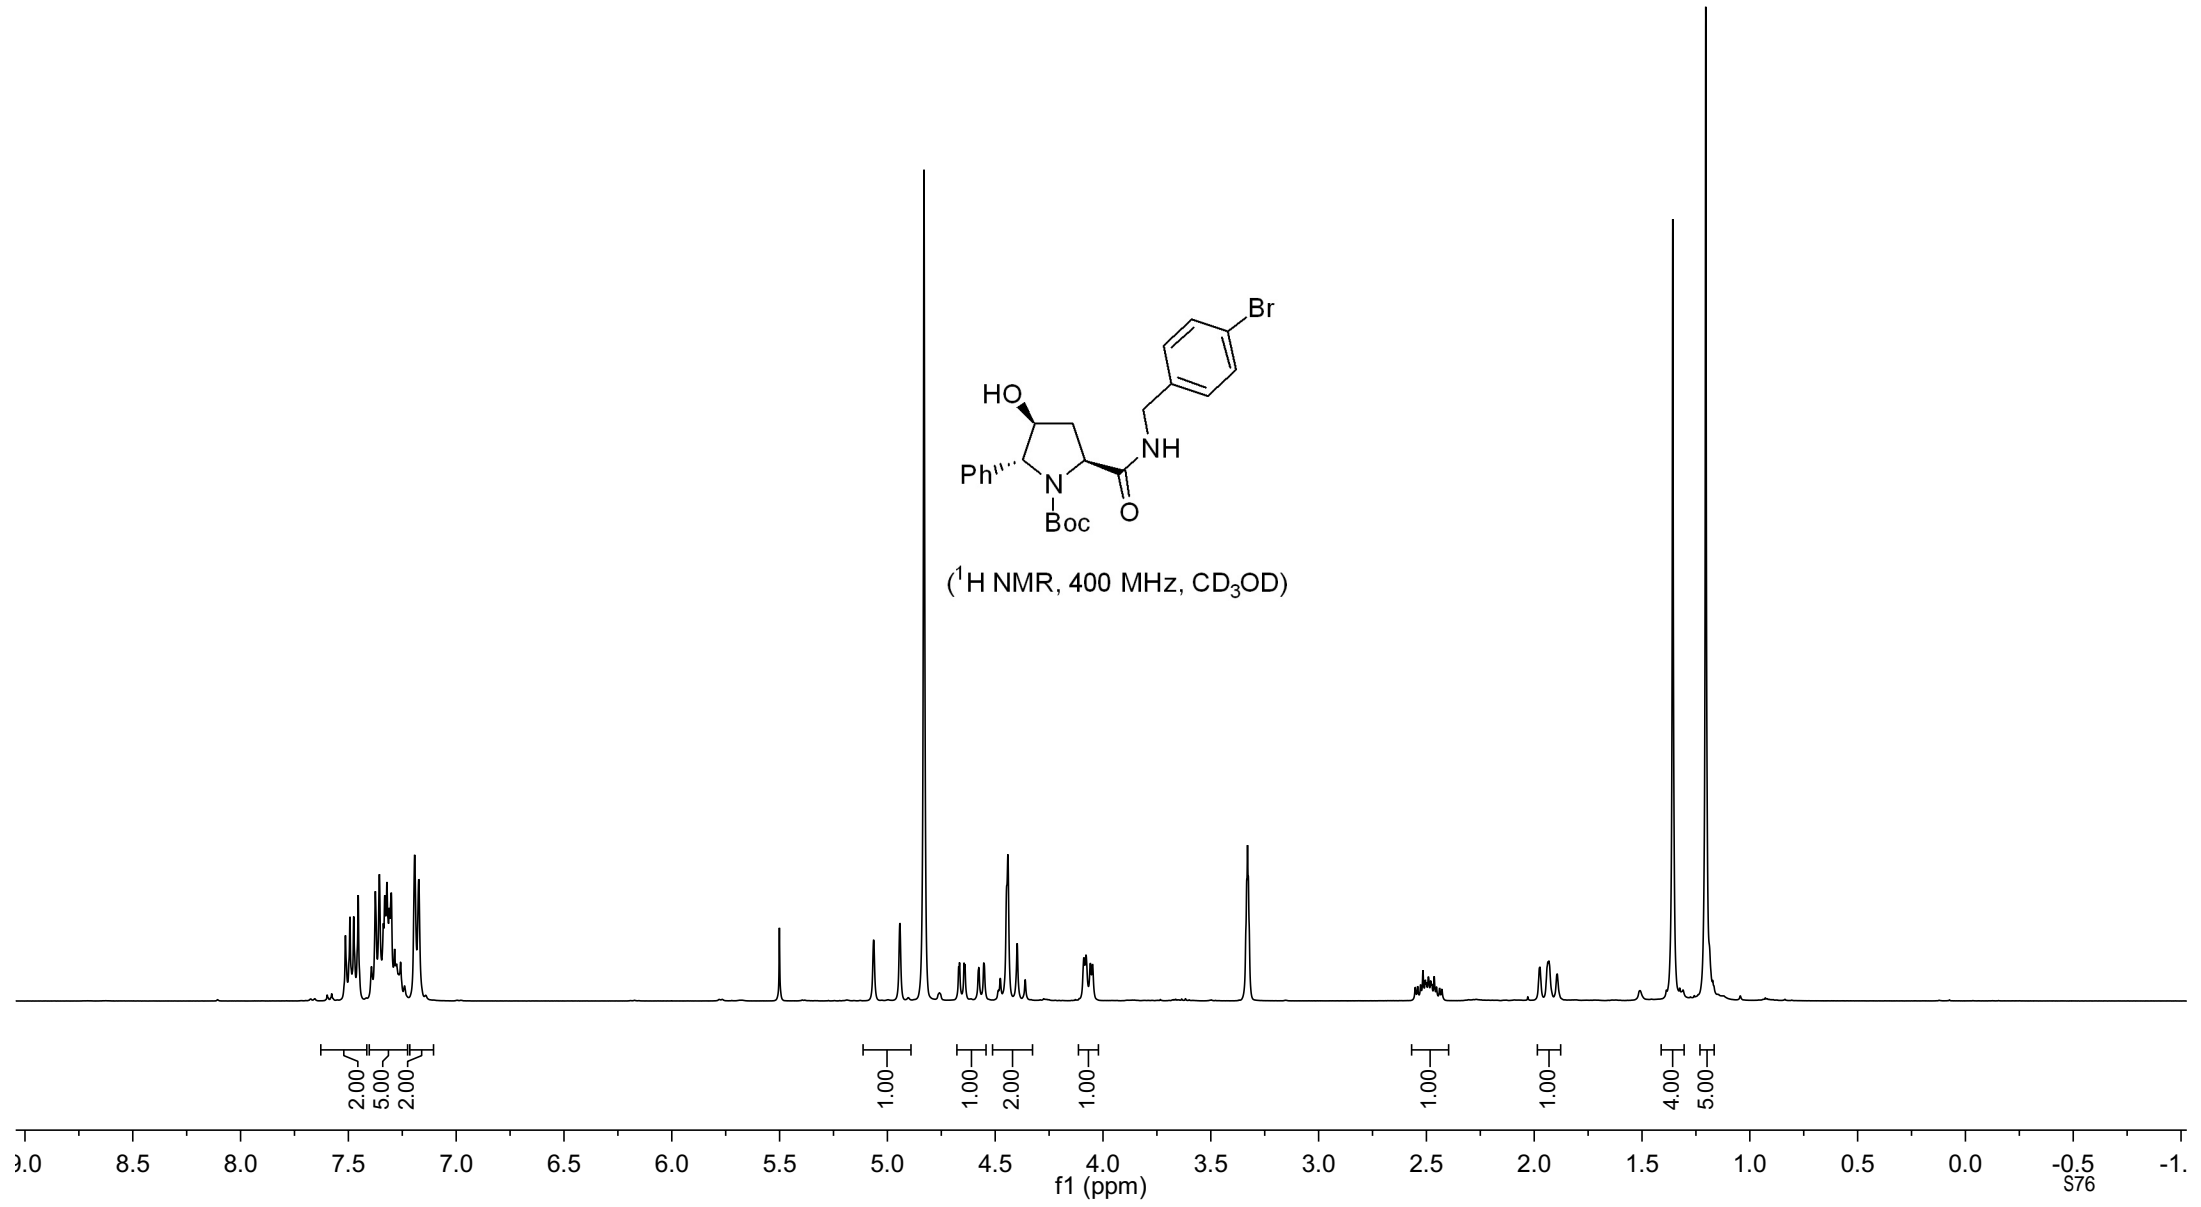

174.745  
174.467

154.790  
154.142  
141.166  
139.981  
137.660  
131.298  
131.082  
129.733  
128.981  
128.331  
128.255  
126.952  
125.116  
124.922  
120.767  
120.374

80.842  
80.195  
77.972  
77.377  
72.177  
71.631  
60.982  
60.818

42.458  
42.187  
35.033  
34.365  
27.140  
26.924

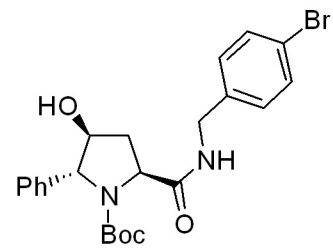

(<sup>13</sup>C NMR, 100 MHz, CD<sub>3</sub>OD)

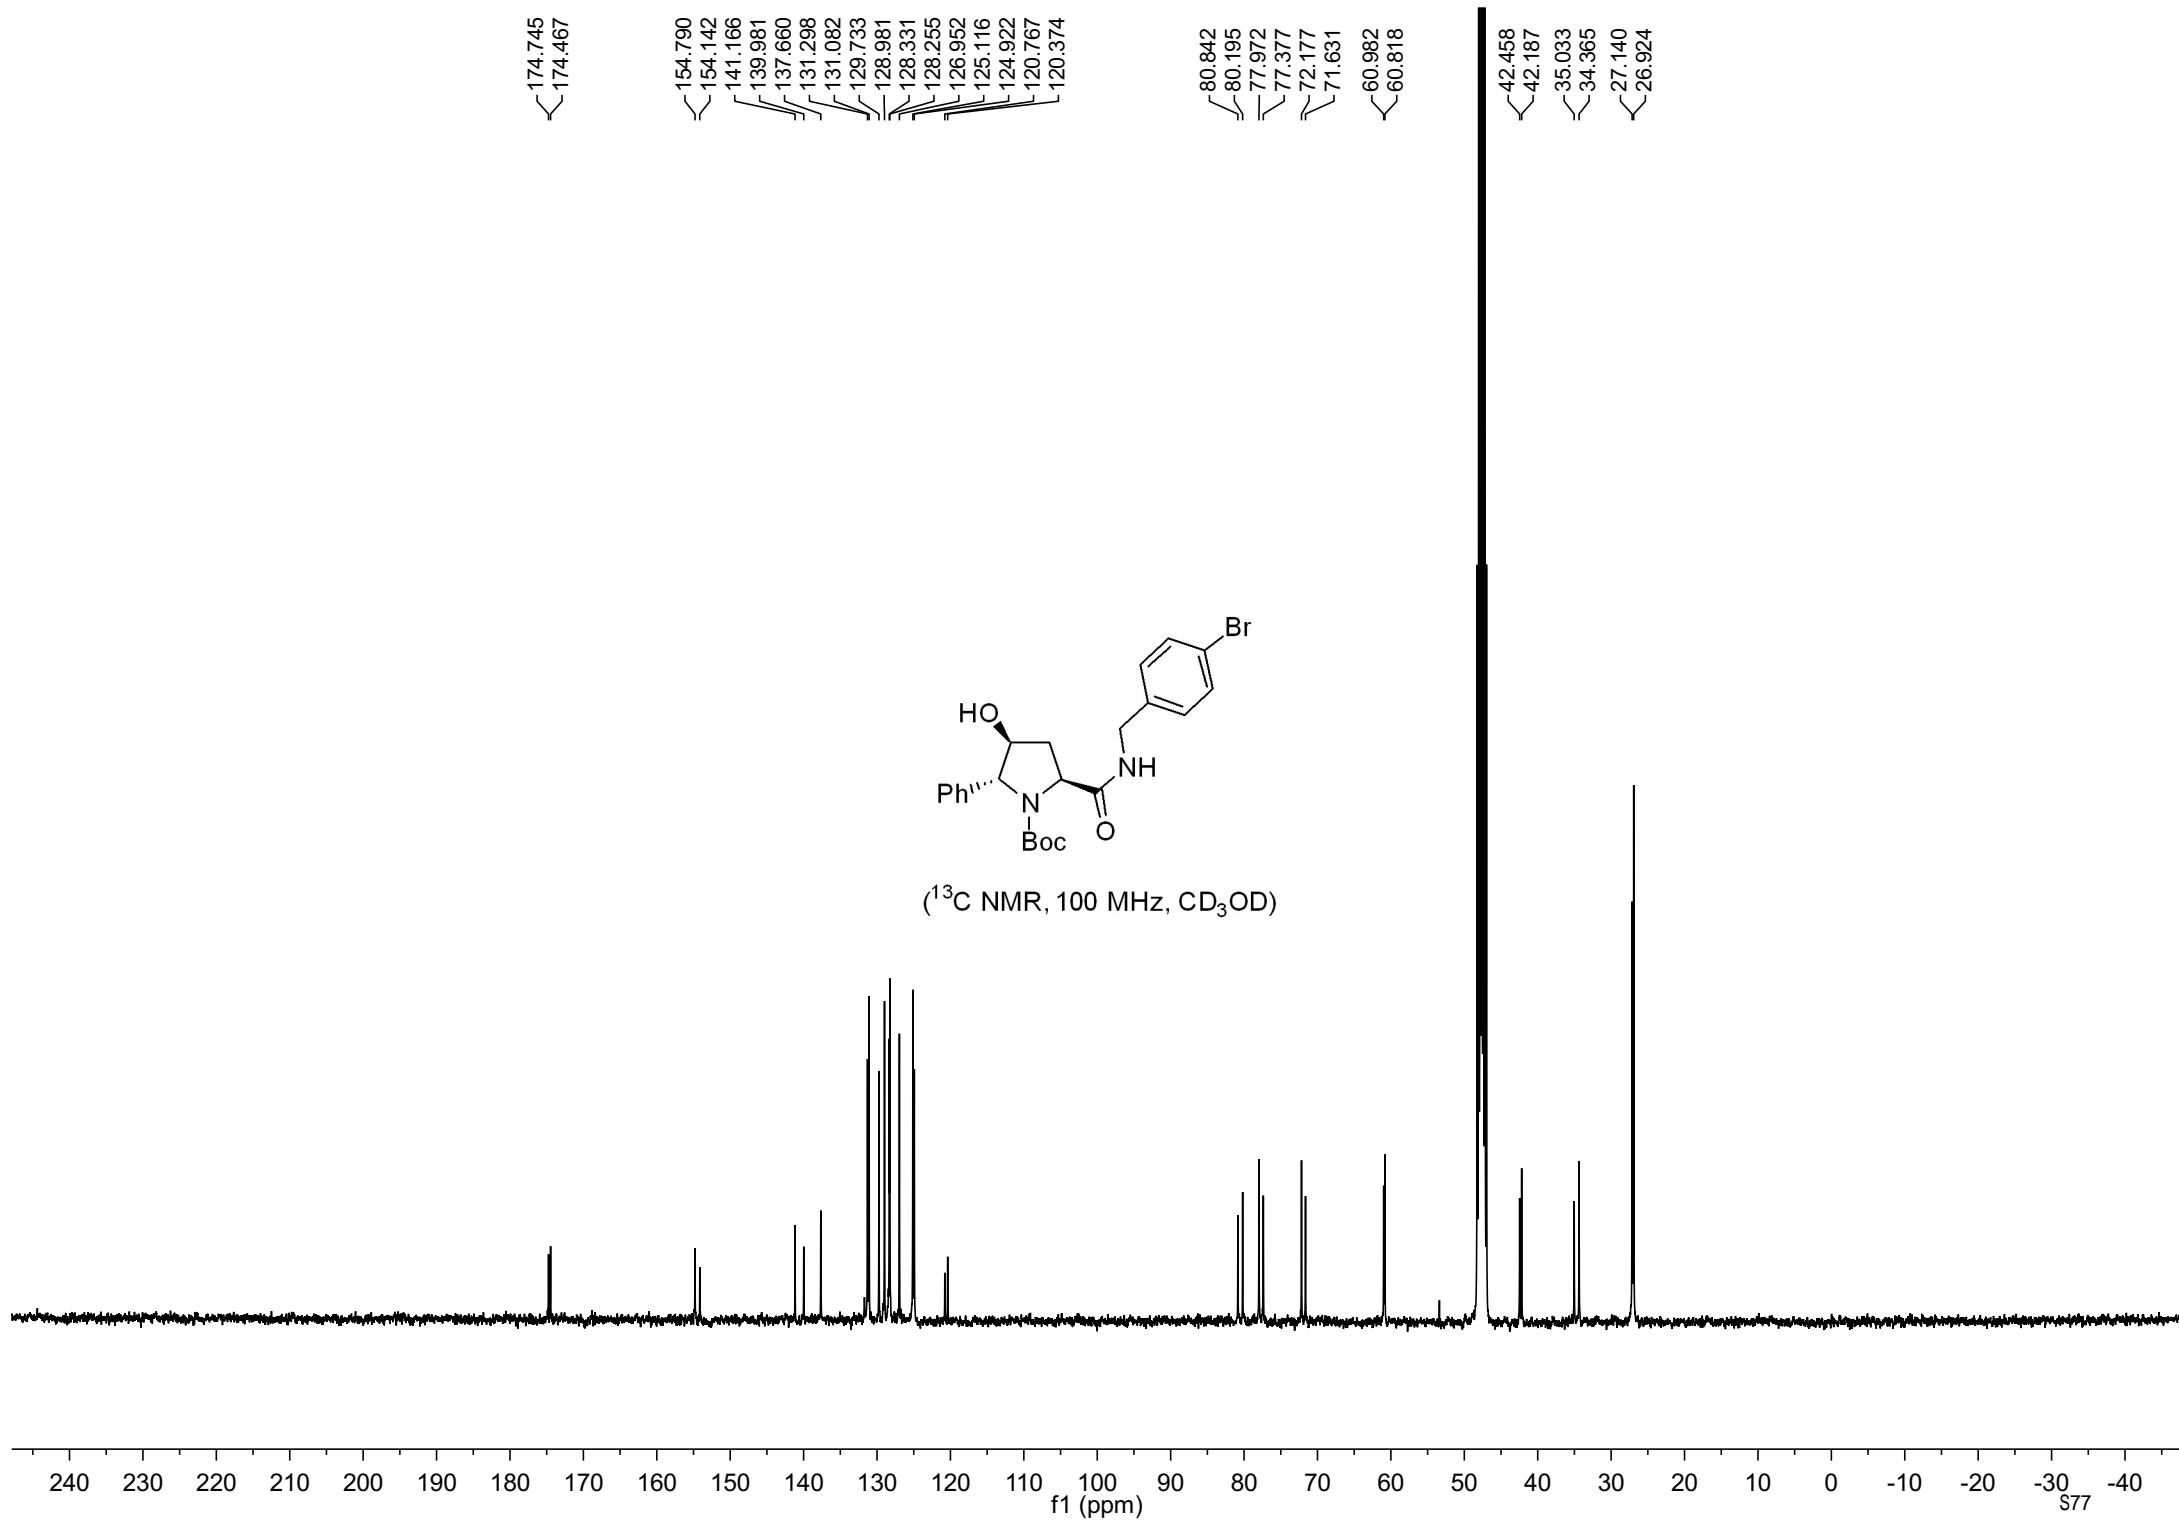

7.392  
7.383  
7.374  
7.365  
7.355  
7.346  
7.284  
7.265  
7.194  
7.187  
7.175  
7.169

5.068  
4.934

2.502  
2.491  
2.477  
2.474  
2.466  
2.455  
2.449  
2.438  
2.430  
2.428  
2.413  
2.402

1.901  
1.861  
1.822  
1.463  
1.444  
1.434  
1.427  
1.412  
1.404  
1.399  
1.380  
1.373  
1.368  
1.346  
1.337  
1.319  
1.310  
1.280  
1.273  
1.250  
1.207

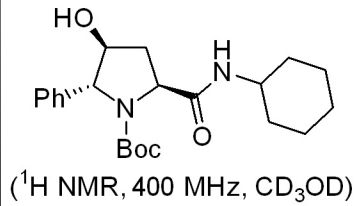

2.02  
1.00  
2.02

0.54  
0.46

0.46  
0.54

1.00

1.01

1.03

5.23  
1.05  
4.86  
5.04  
4.14

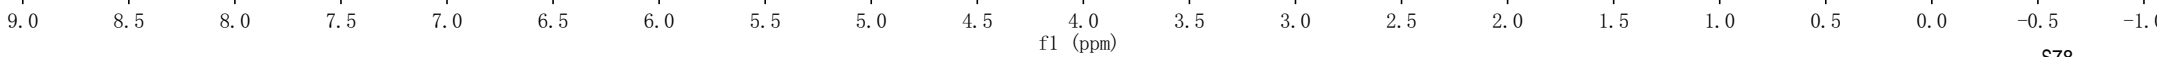

175.359  
174.760

156.045  
155.617

142.527  
141.393  
129.763  
129.667  
128.388  
128.361  
126.481  
126.314

82.276  
81.500  
79.380  
78.786  
73.643  
73.077  
62.284  
62.123

50.173  
49.900  
36.503  
35.740  
33.718  
33.692  
33.510  
33.347  
28.701  
28.337  
26.679  
26.640  
25.966  
25.882

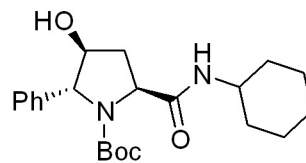

(<sup>13</sup>C NMR, 100 MHz, CD<sub>3</sub>OD)

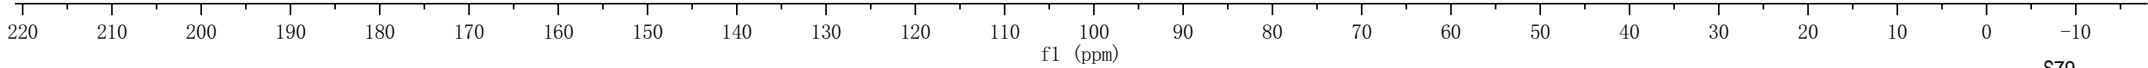

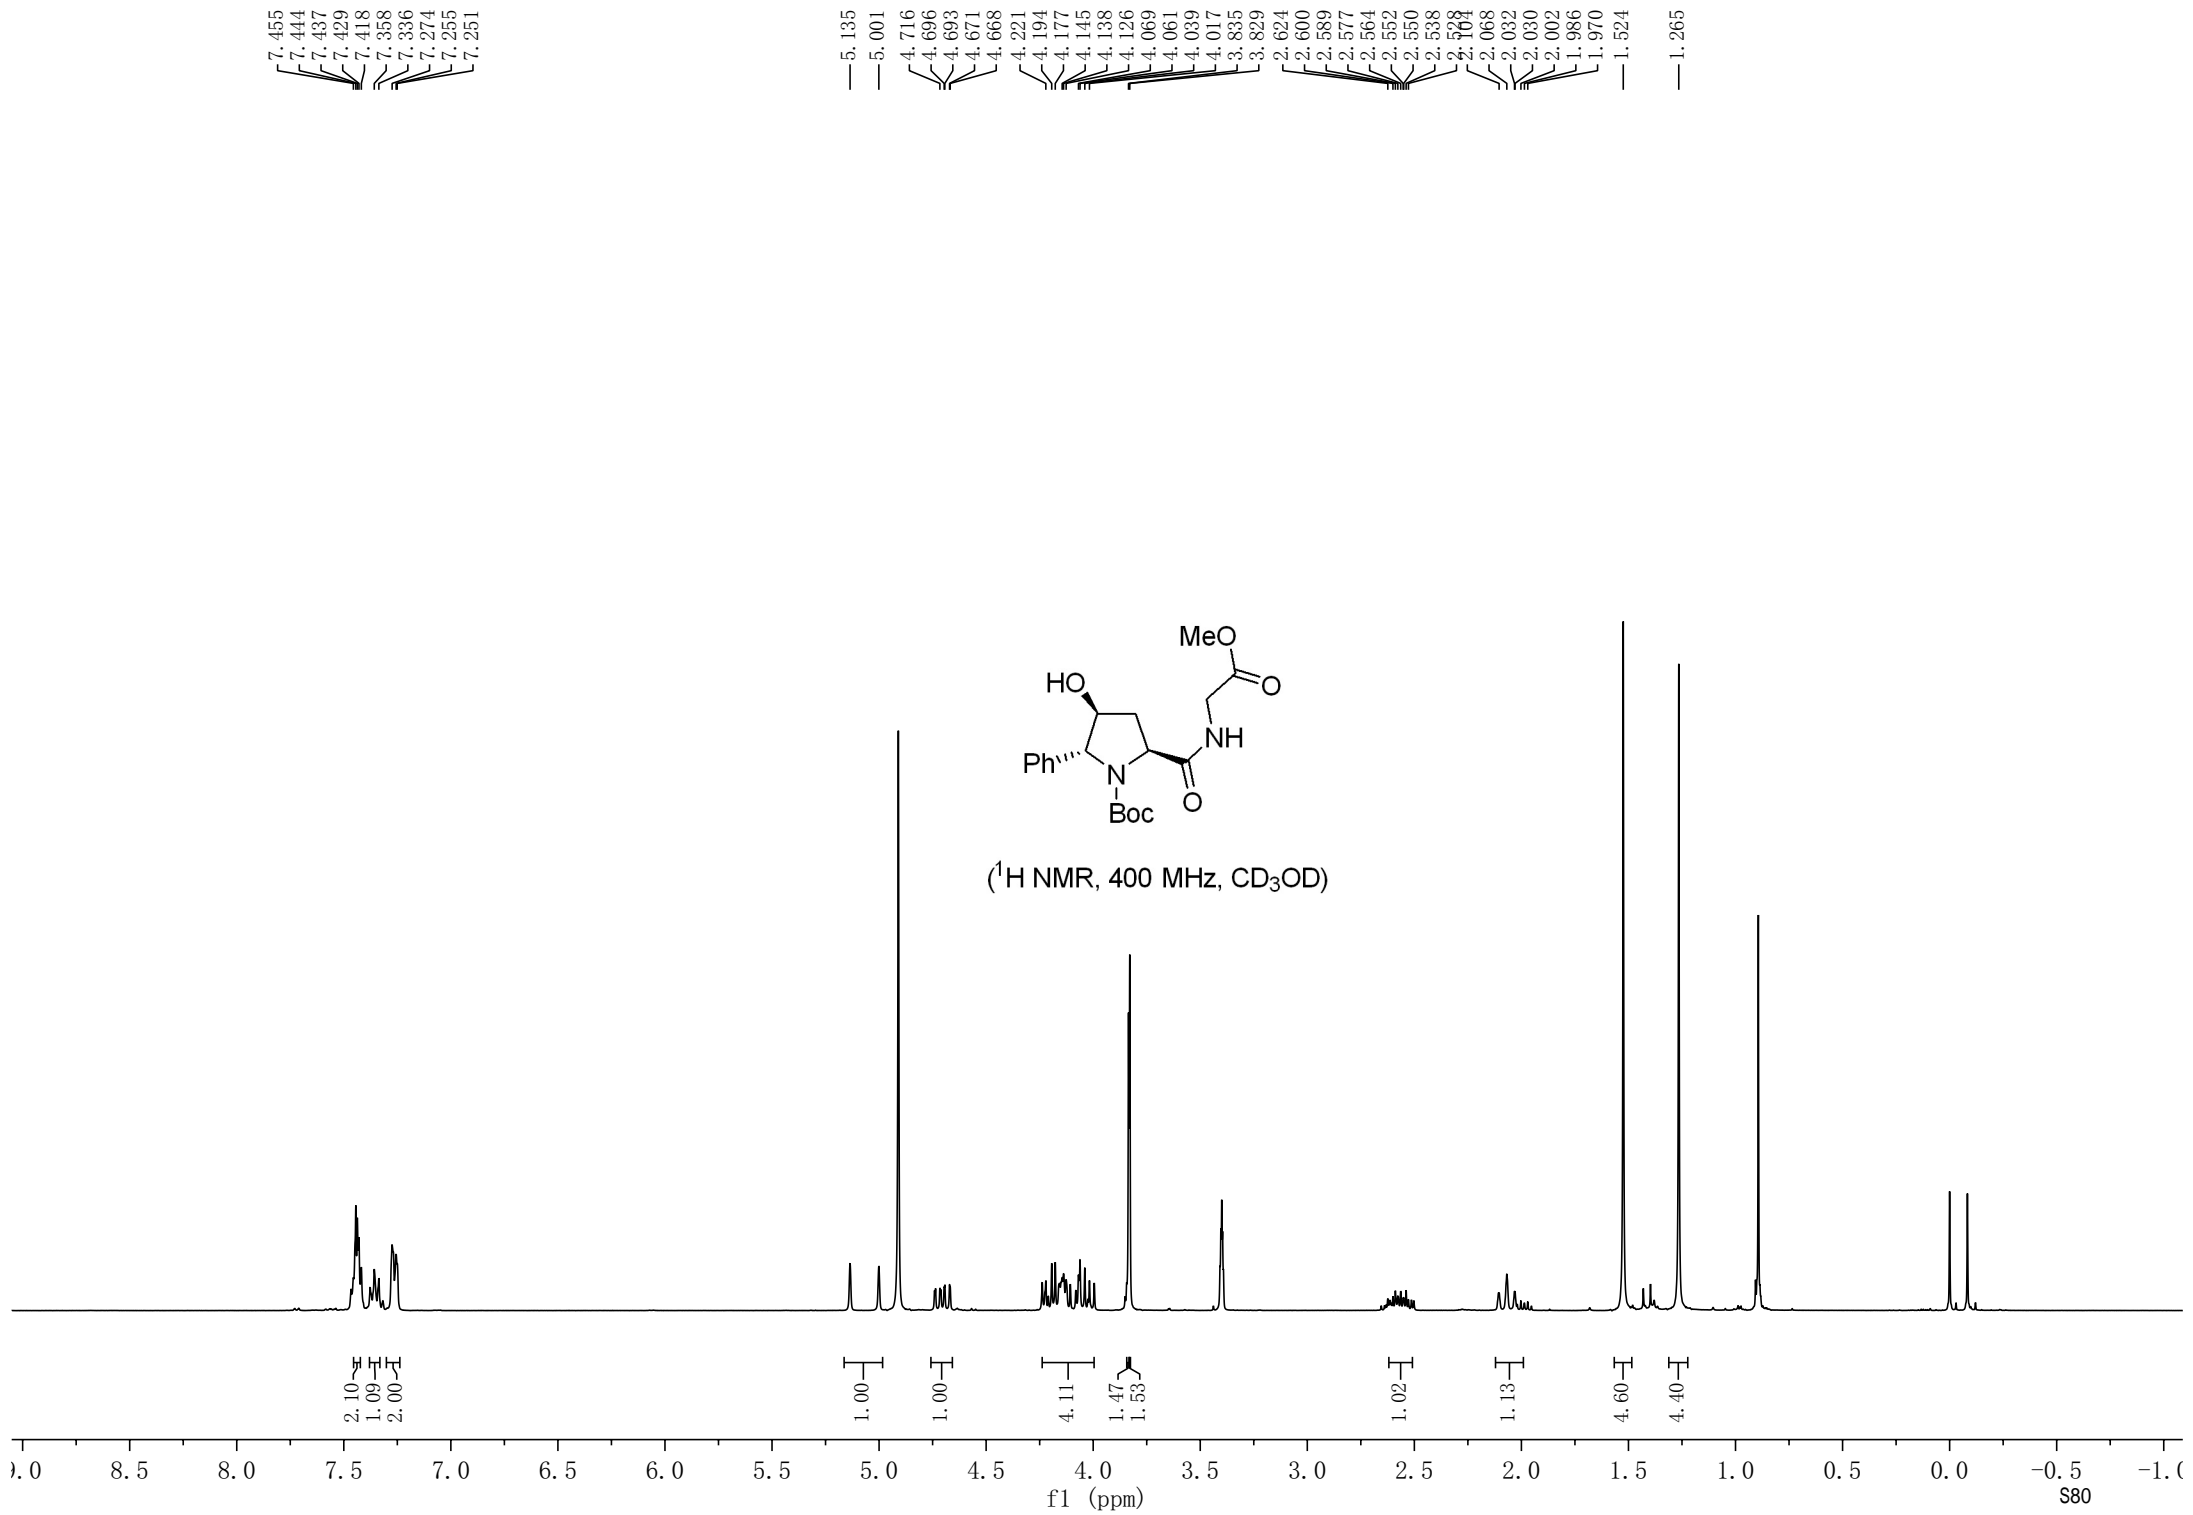

176.851  
176.293  
171.438  
171.252

156.171  
155.572

142.565  
141.389

129.755  
129.671  
128.377  
128.030  
126.547  
126.361

82.397  
81.640  
79.444  
78.835  
73.589  
72.950

62.178  
61.853

52.636

42.167  
42.114  
36.294  
35.678  
28.558  
28.335

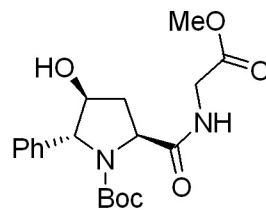

(<sup>13</sup>C NMR, 100 MHz, CD<sub>3</sub>OD)

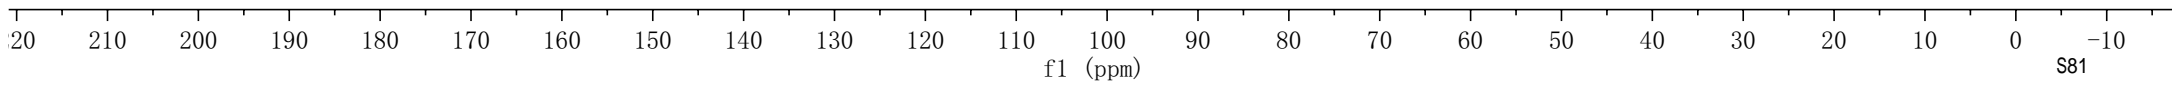

7.254  
7.245  
7.235  
7.226  
7.216  
7.111  
7.092  
7.073  
6.992  
6.976  
6.955  
6.935

5.020  
4.473  
4.470  
4.448  
4.445  
4.039  
4.027  
4.020  
4.010

2.447  
2.445  
2.434  
2.423  
2.420  
2.409  
2.398  
2.387  
2.384  
2.373  
2.350  
2.346  
1.486  
1.412  
1.387  
1.217

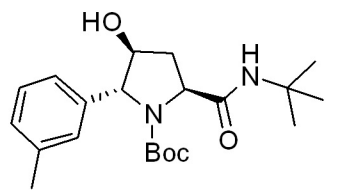

1.06  
1.07  
2.01

0.57

1.08

1.00

1.01  
3.03

1.00

5.13  
5.14  
3.87  
3.87

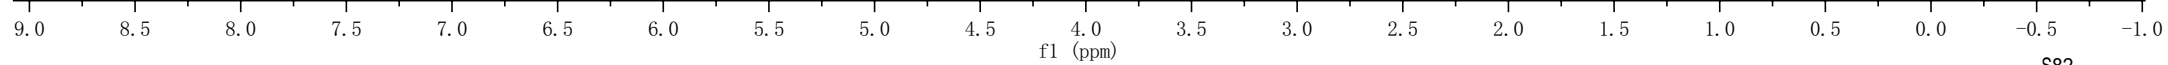

178.133  
177.608

158.620  
158.198

144.979  
143.867  
142.069  
141.954  
132.195  
132.102  
131.565  
131.490  
129.618  
129.551  
126.012  
125.756

84.709  
83.954  
81.908  
81.315  
76.182  
75.629  
65.379  
65.204

54.810  
54.766

38.881  
38.123  
31.689  
31.362  
31.258  
31.212  
30.858  
24.064  
24.034

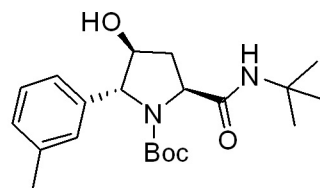

(<sup>13</sup>C NMR, 100 MHz, CD<sub>3</sub>OD)

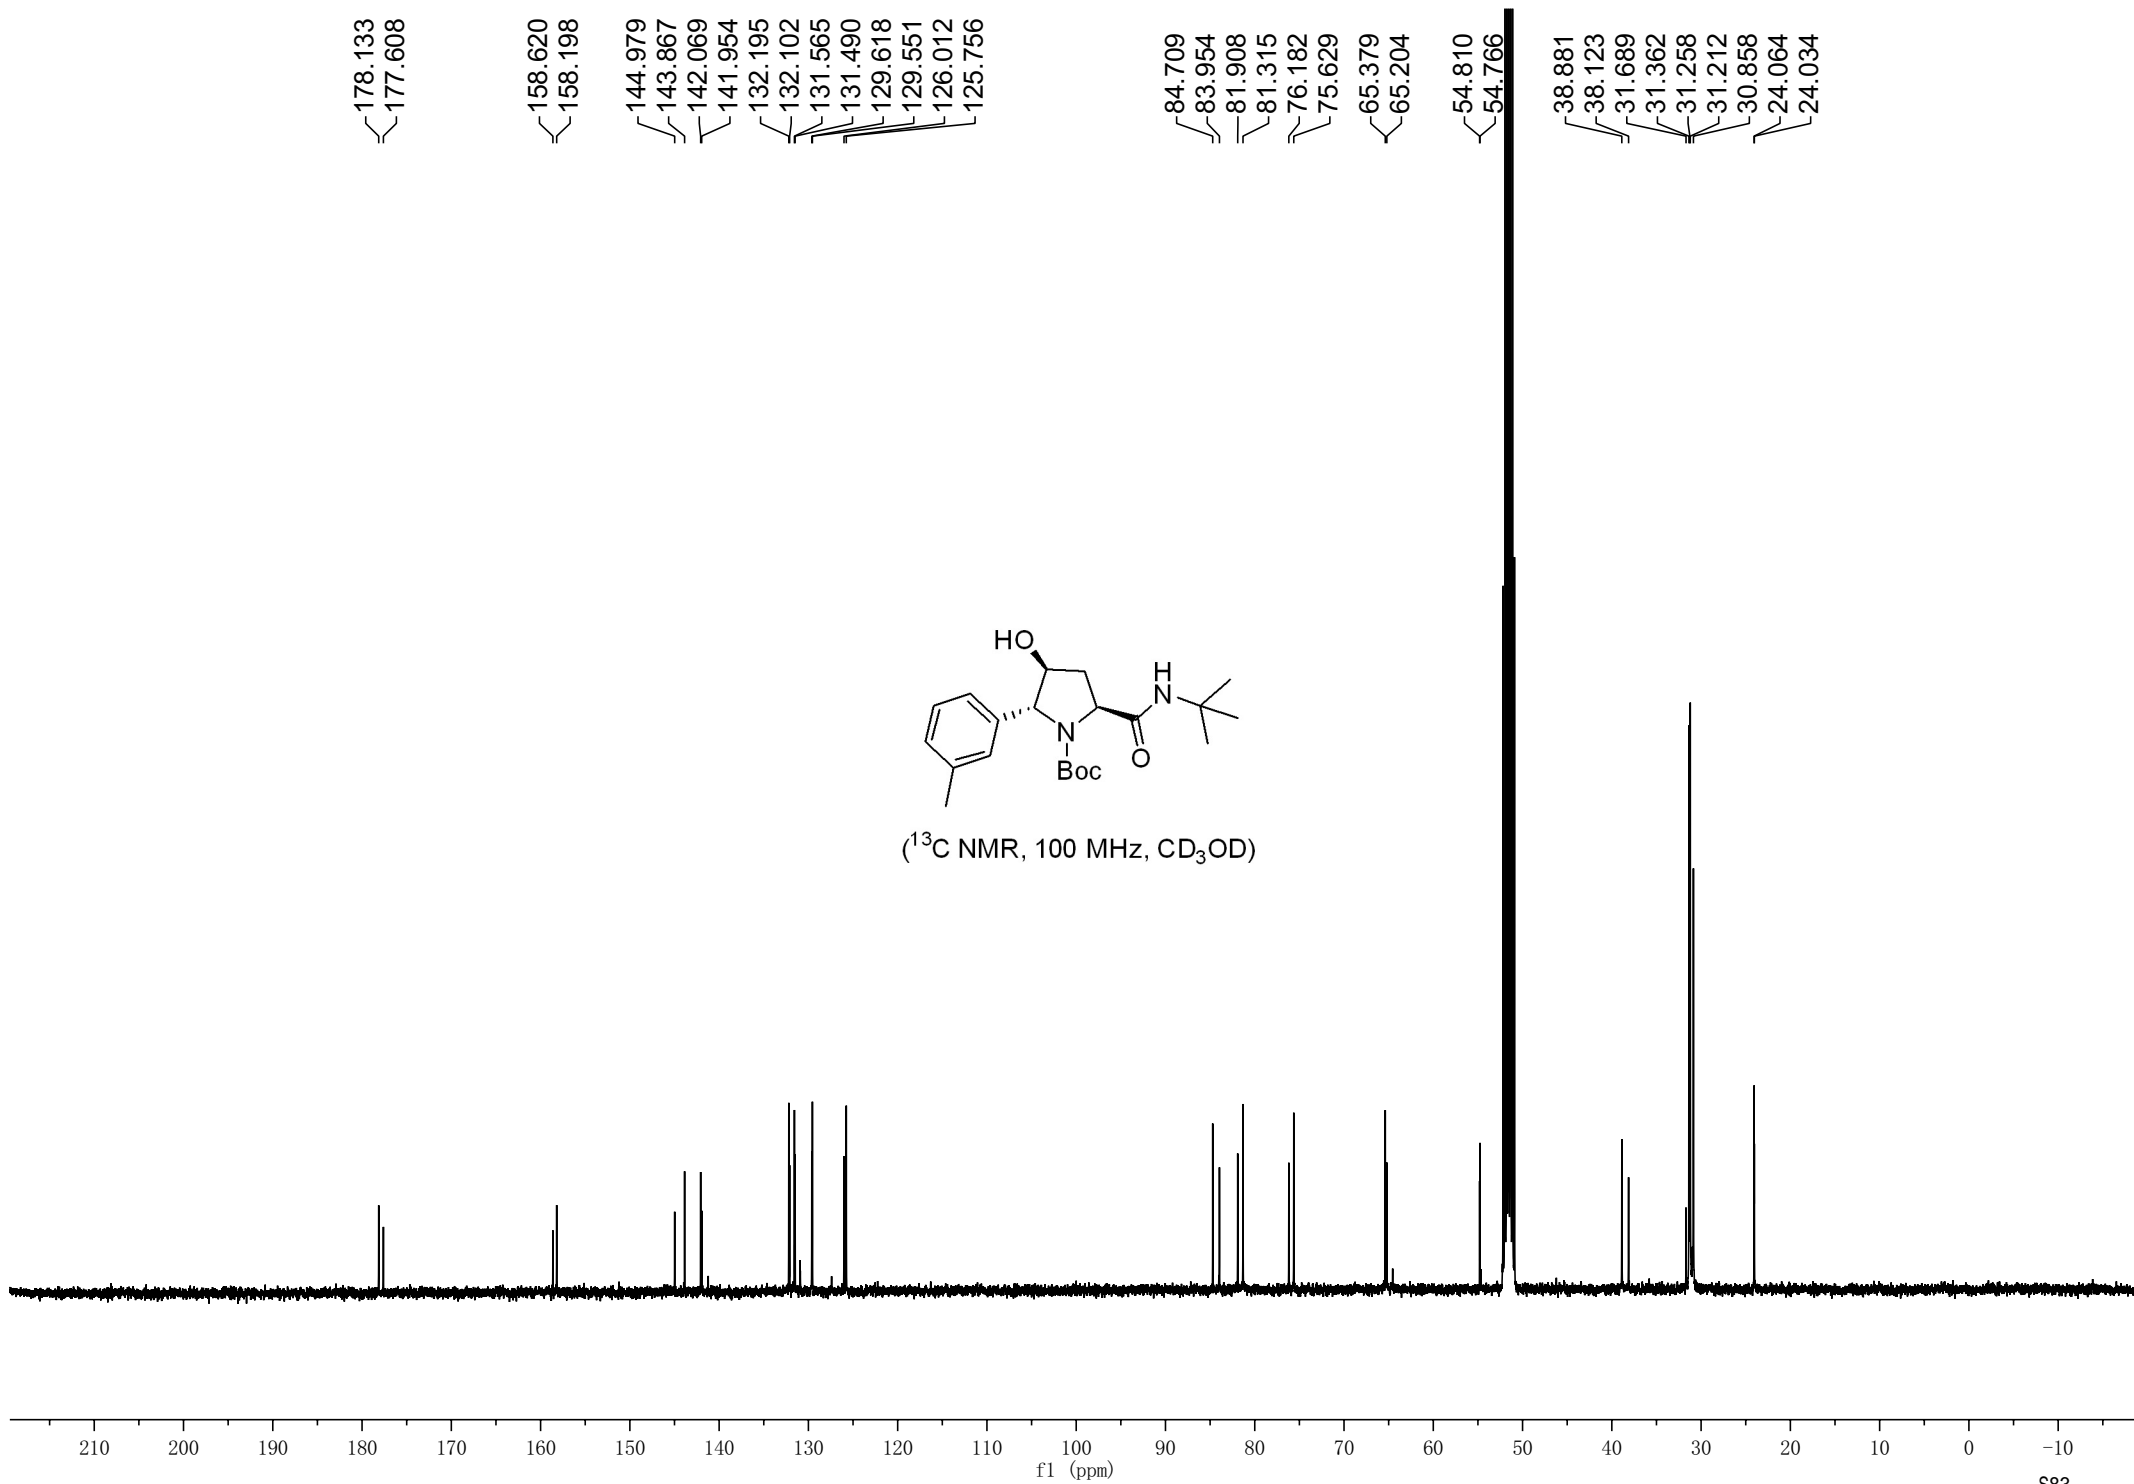



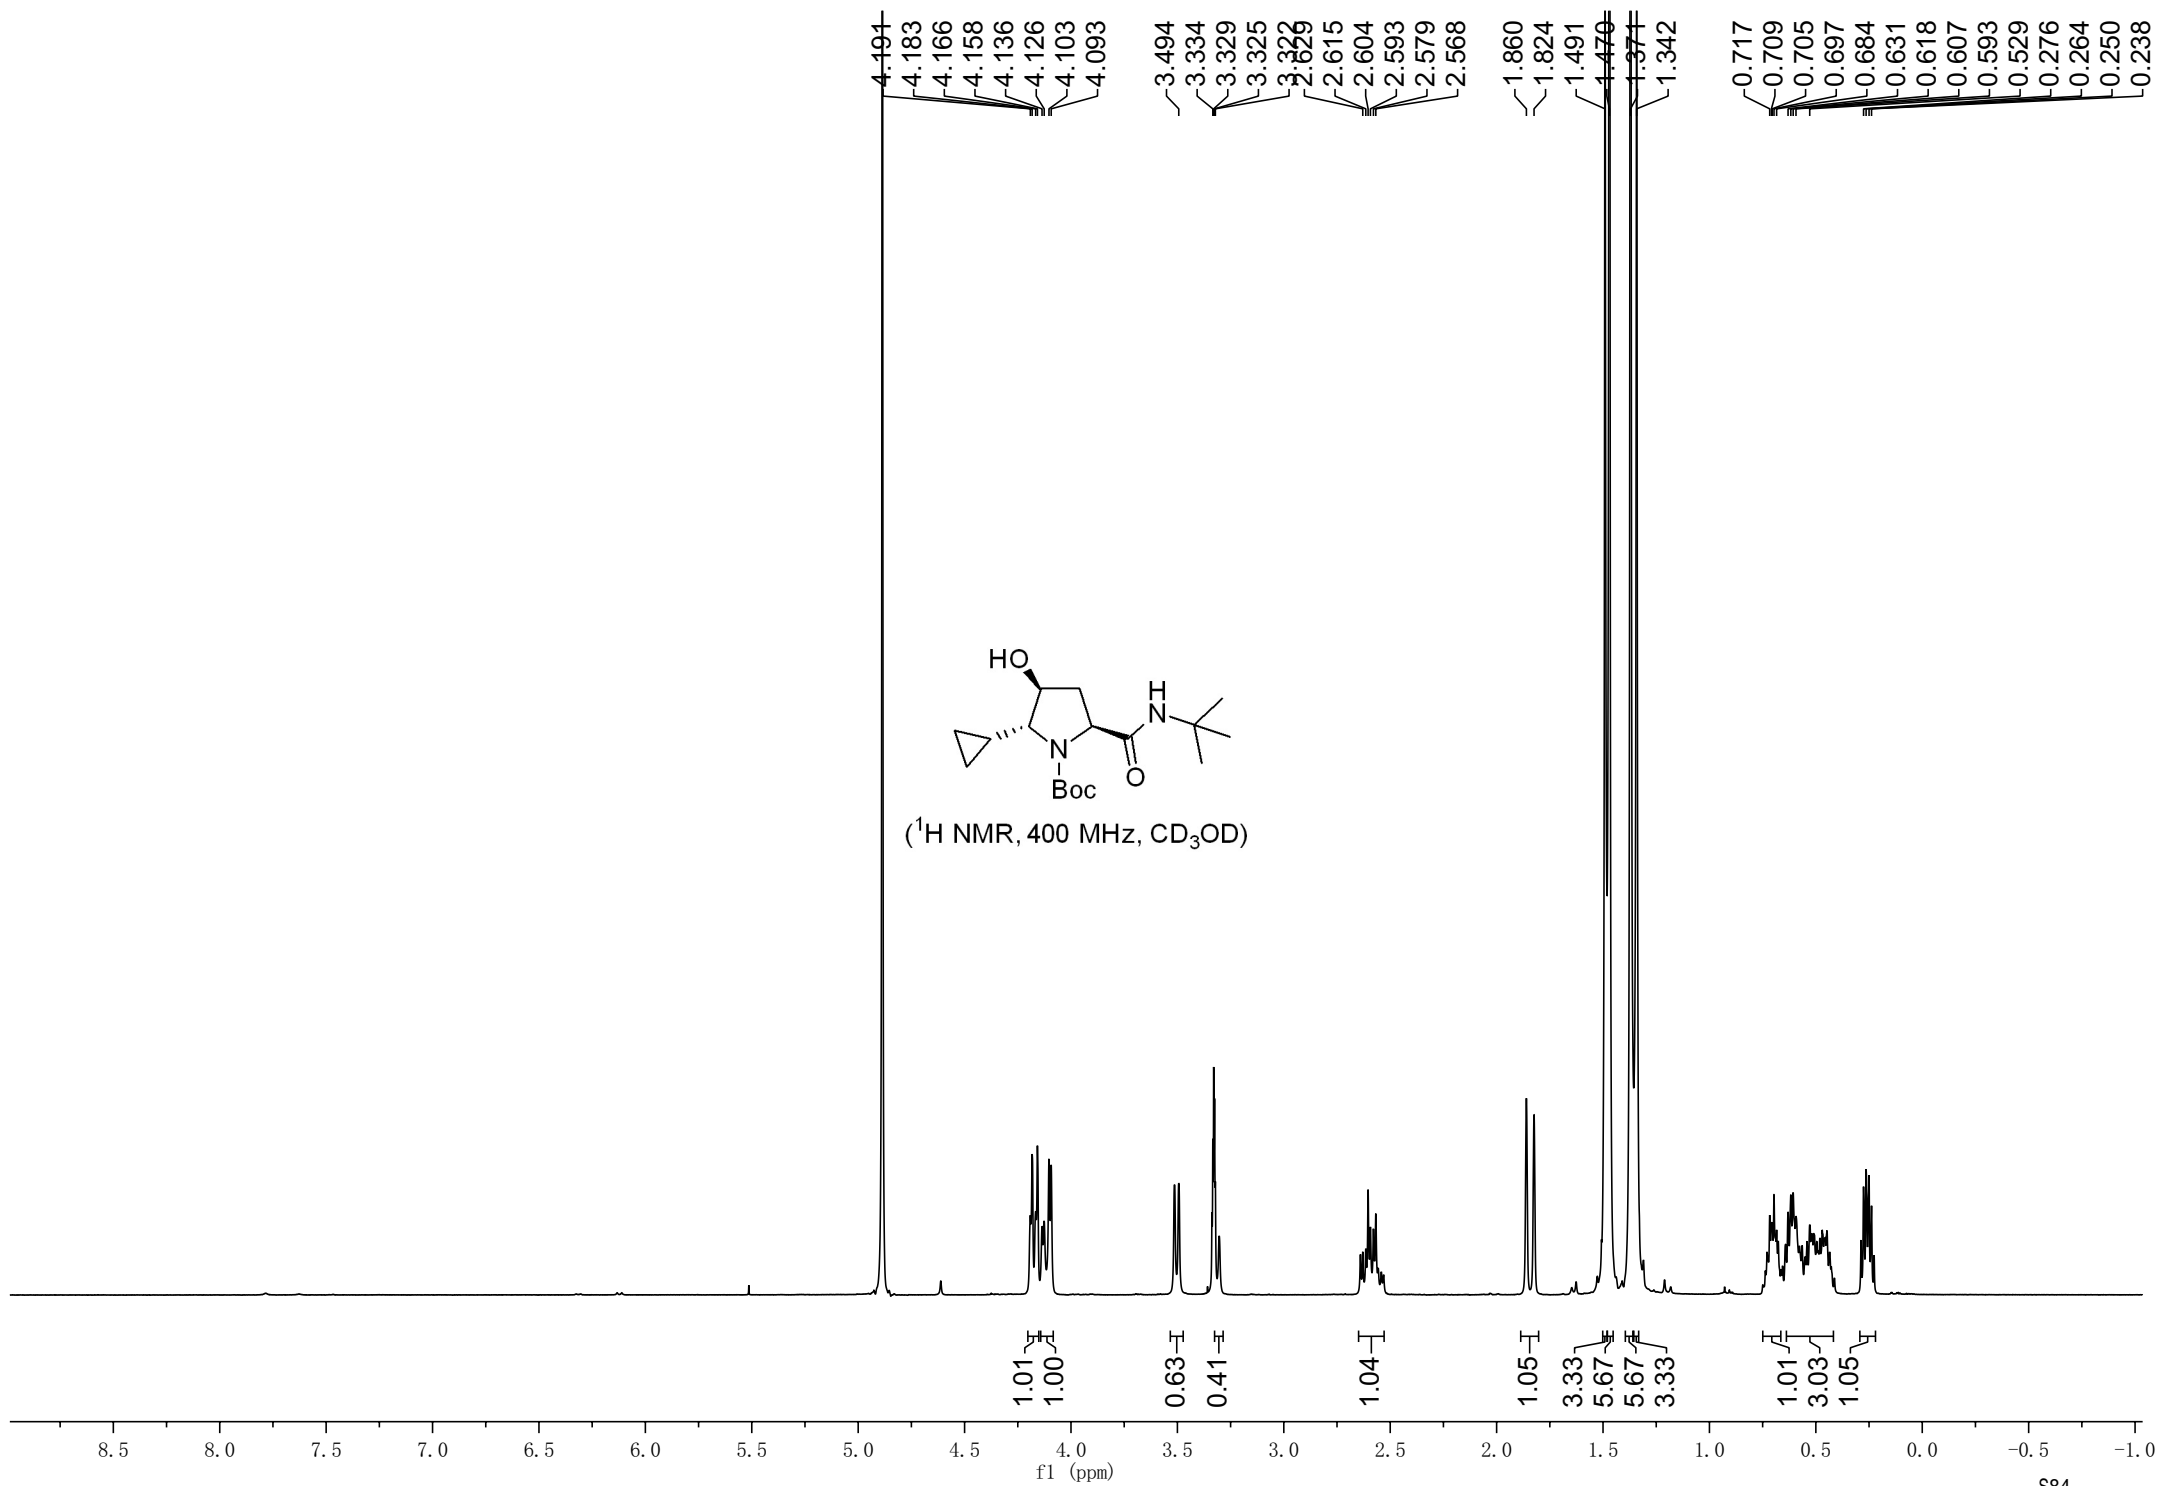

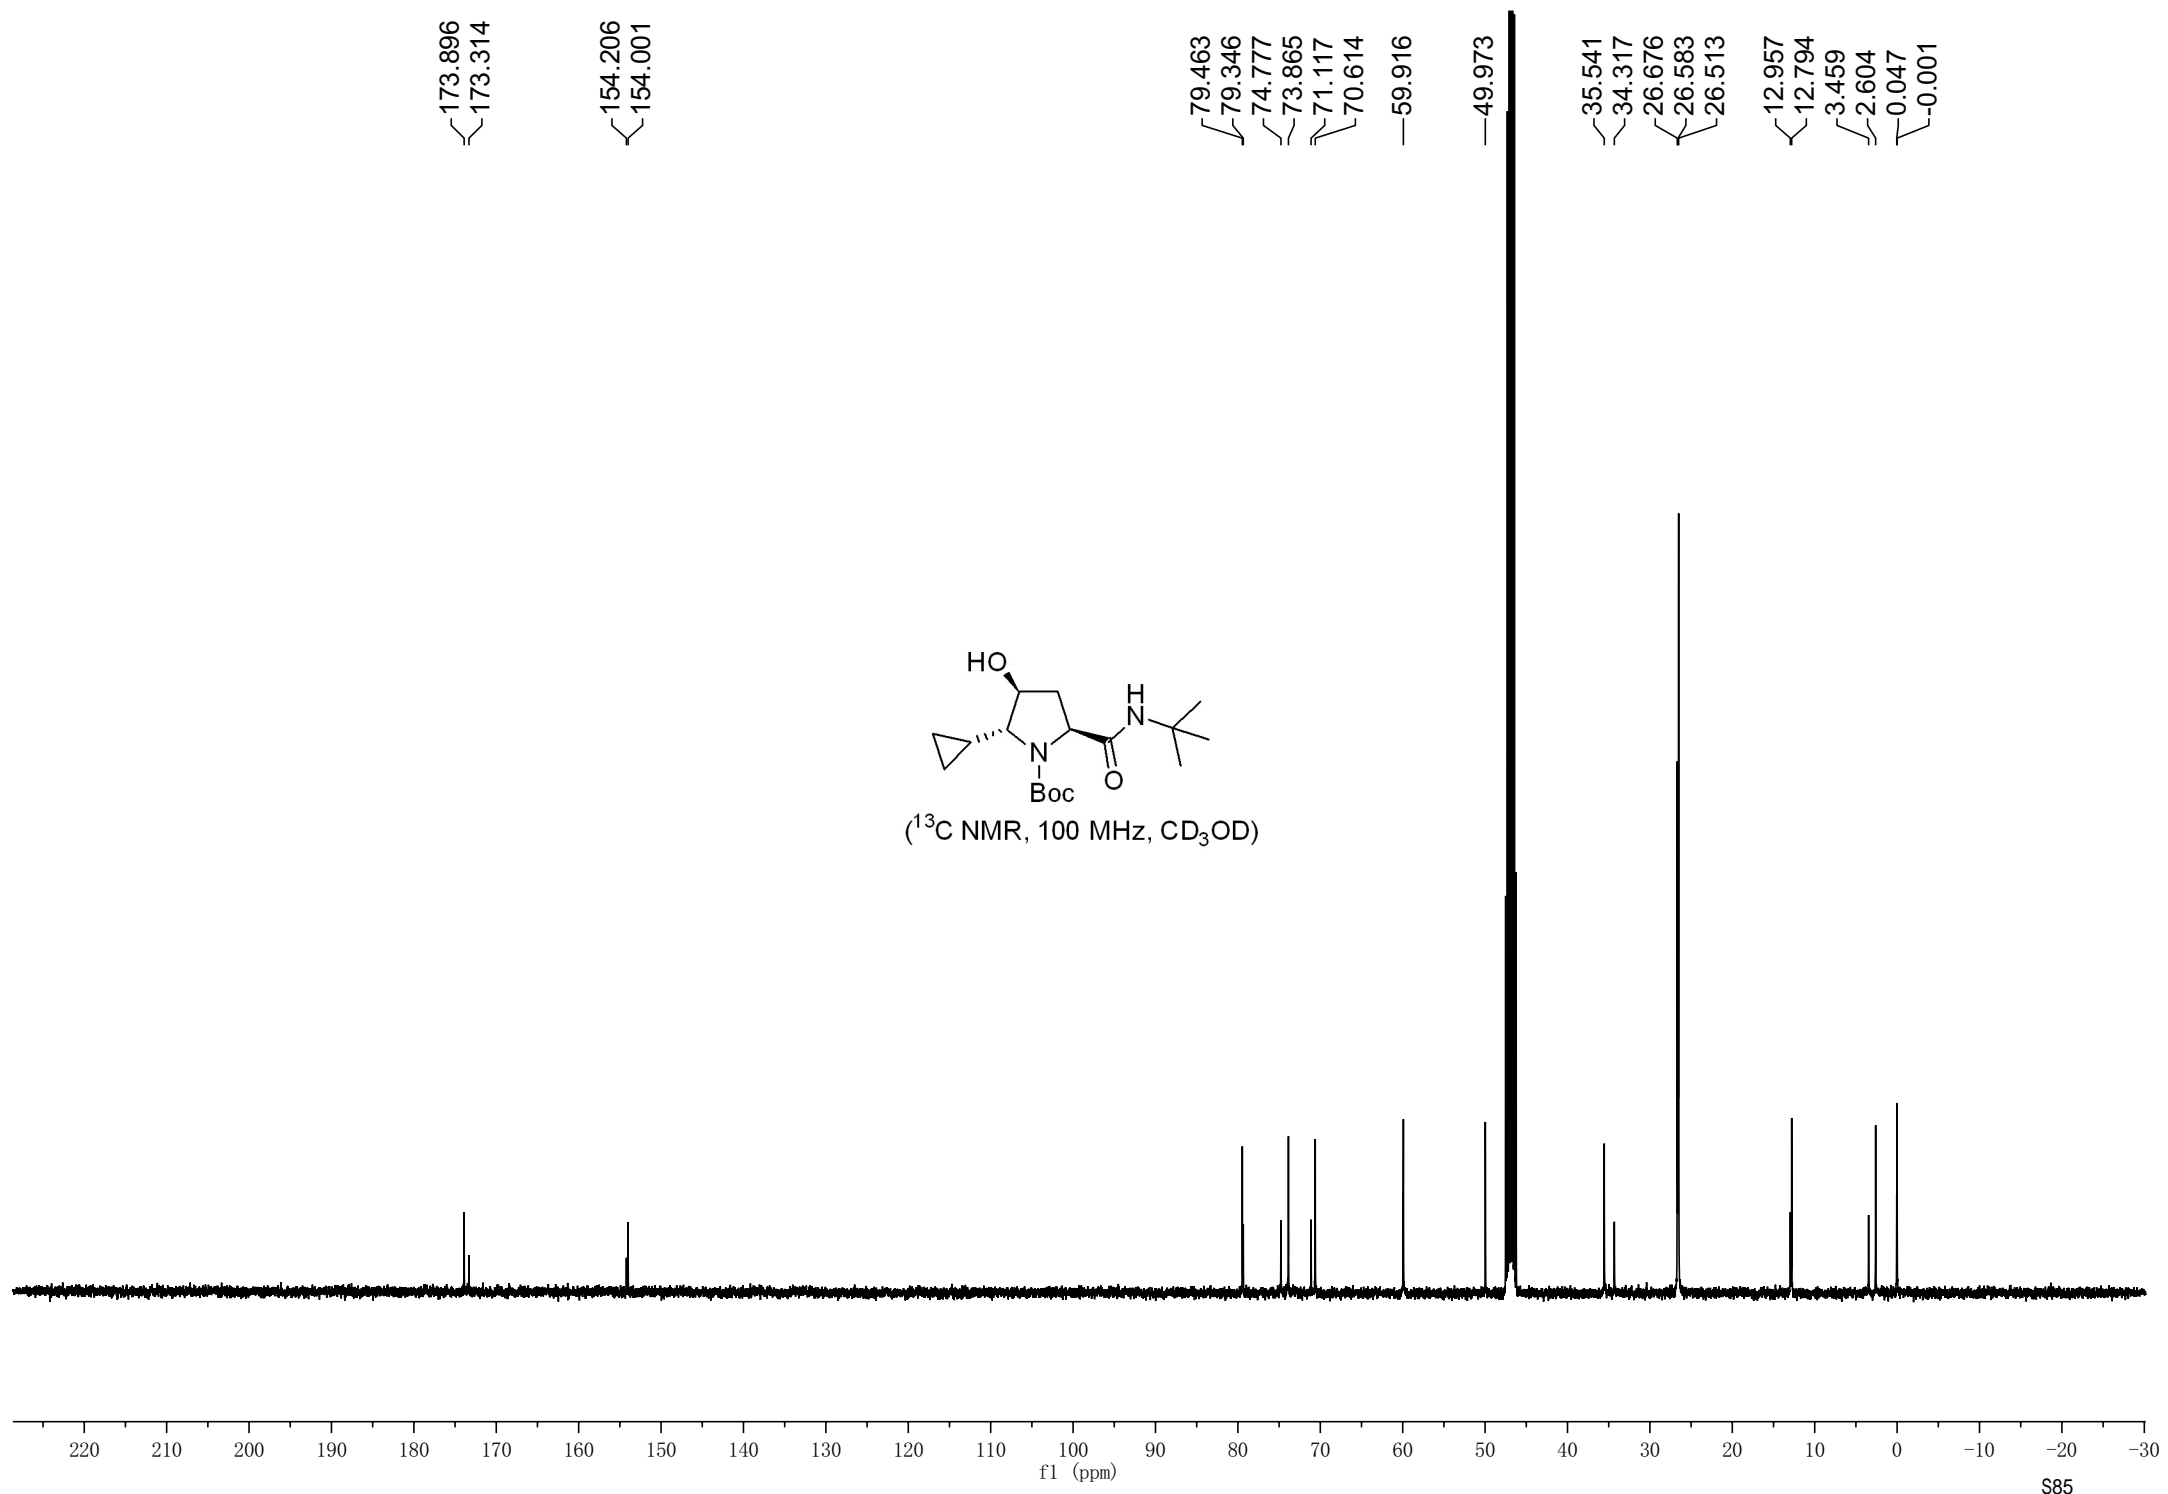

5.074  
5.055  
5.049  
5.039  
5.032  
5.029  
5.012  
4.996  
4.990  
4.986  
4.970  
4.337  
4.334  
4.307  
4.294  
4.284  
4.287  
4.282  
3.349  
3.346  
3.324  
3.321  
3.249  
3.239  
3.228  
3.158  
3.149  
3.134  
3.125  
3.058  
1.726  
1.712  
1.701  
1.690  
1.676  
1.664  
1.661  
1.650  
1.279  
1.258  
1.246  
1.045  
1.009  
0.989  
0.666  
0.564  
0.535

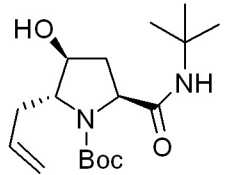

(<sup>1</sup>H NMR, 400 MHz, CD<sub>3</sub>OD)

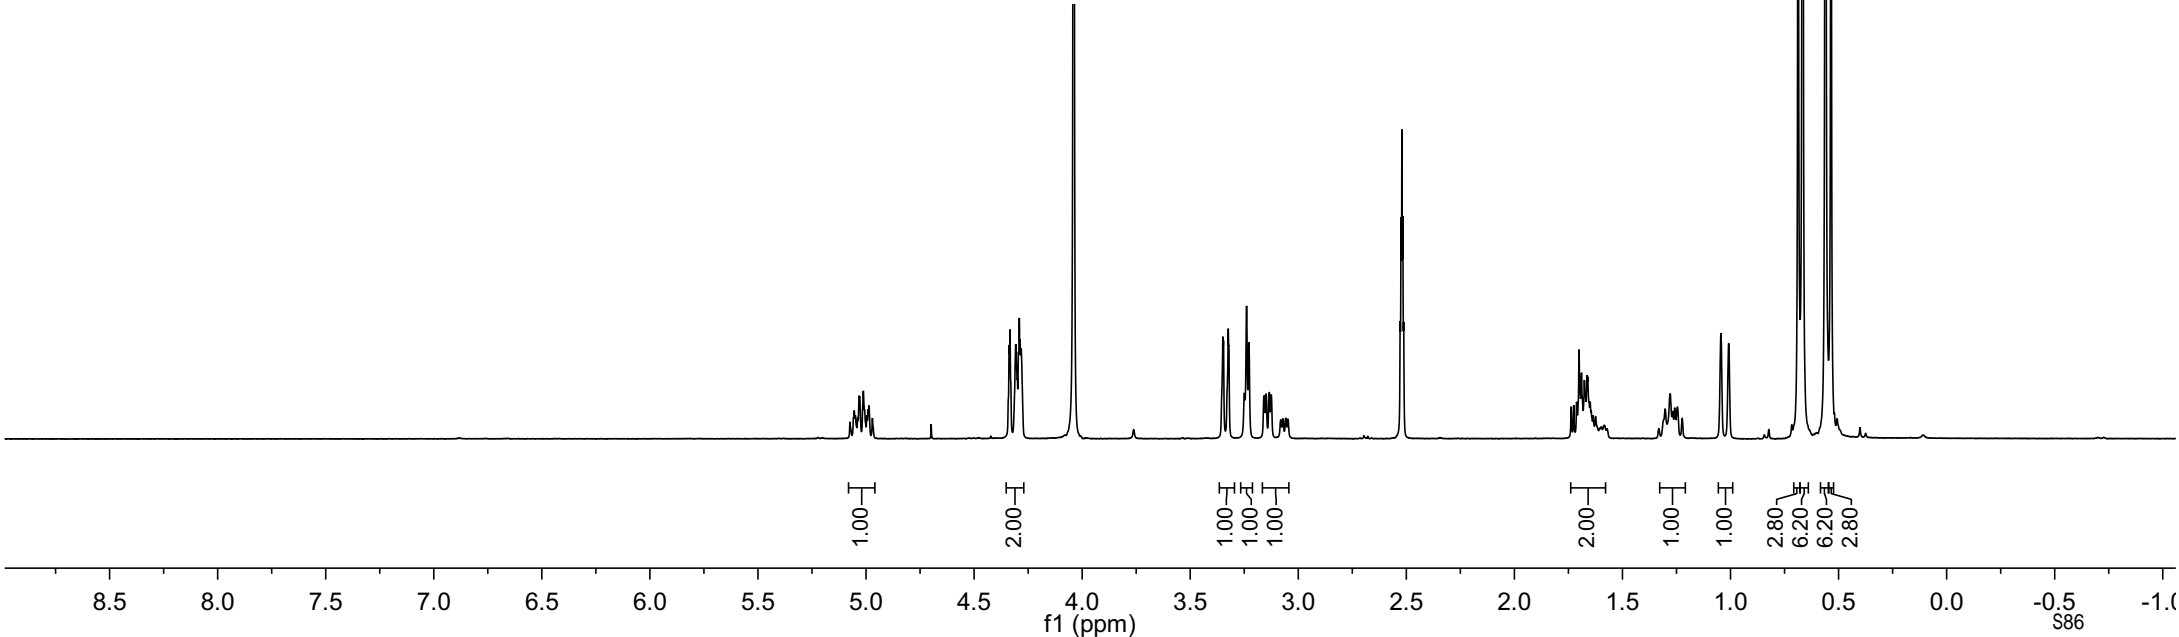

173.099  
172.654

153.041  
152.905

132.973  
132.896

115.442  
115.379

79.119  
78.846

72.400  
71.464

66.294  
66.108

59.429  
59.377

49.435  
49.398

35.524  
34.698

34.425  
33.627

26.083  
25.957

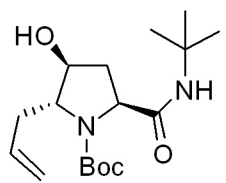

(<sup>13</sup>C NMR, 100 MHz, CD<sub>3</sub>OD)

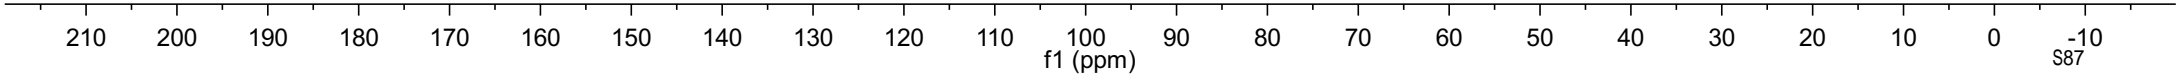

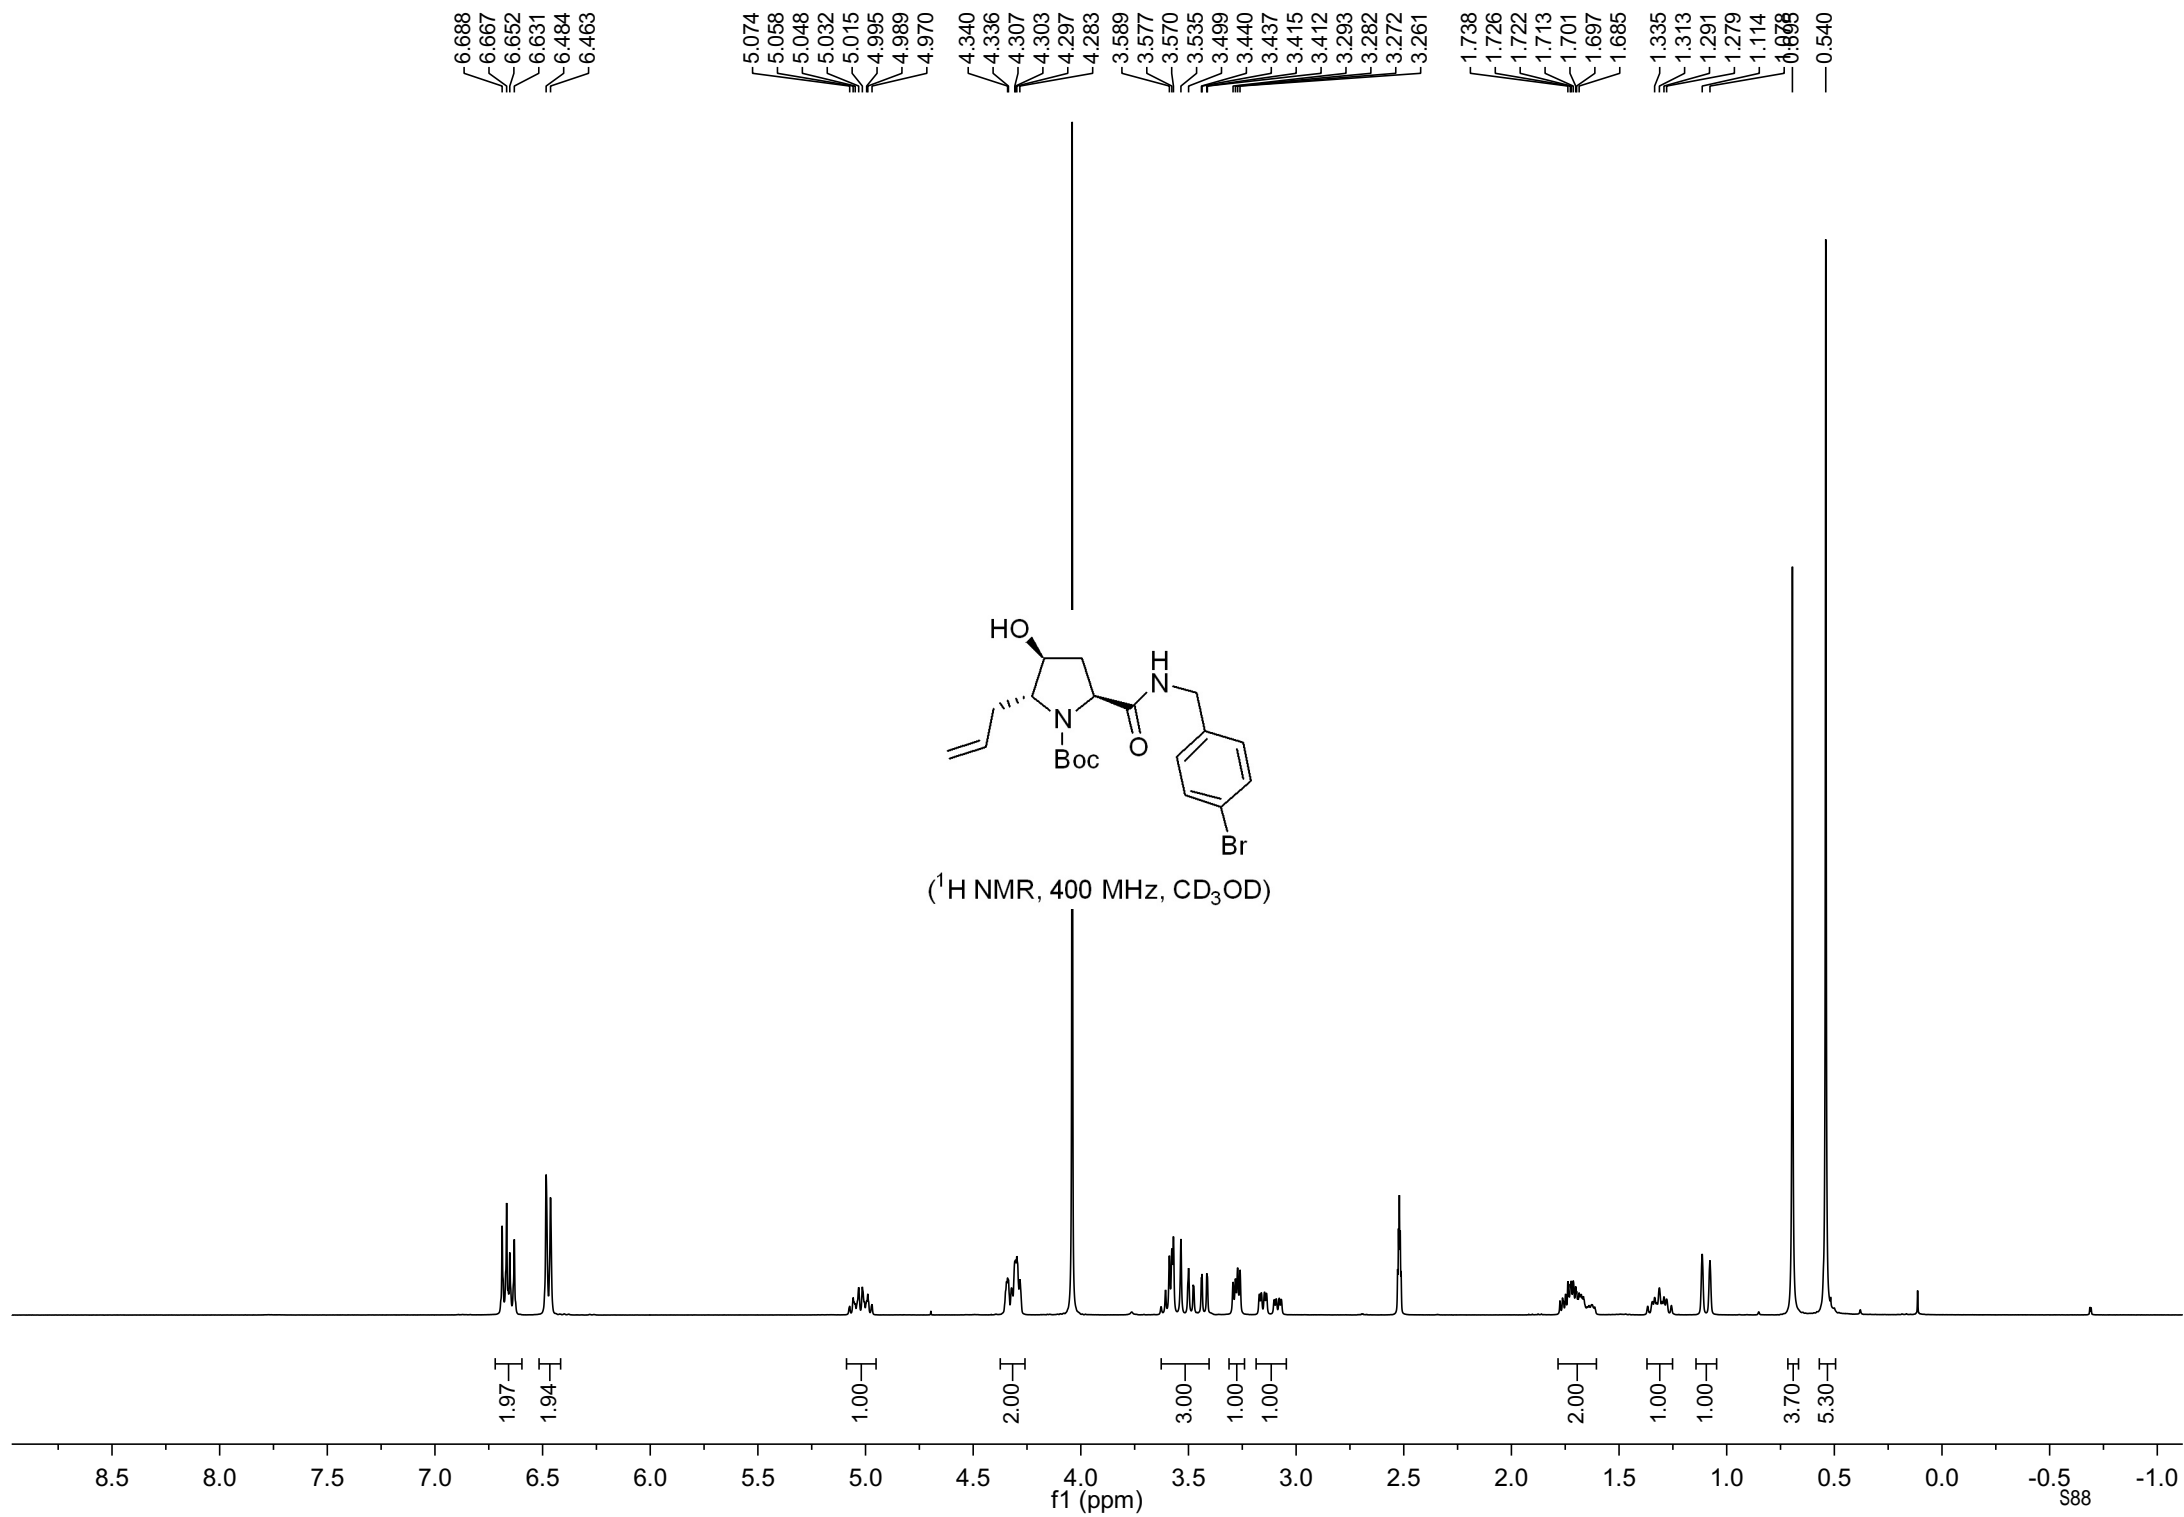

173.650  
173.527

153.184  
152.796

136.308  
136.285  
132.921  
132.864  
129.960  
129.753  
128.393  
127.685  
119.422  
119.066  
115.510

79.158  
79.034  
72.475  
71.485  
66.189  
65.987  
58.956  
58.821

41.052  
40.837  
35.393  
34.781  
34.275  
33.758  
26.013  
25.832

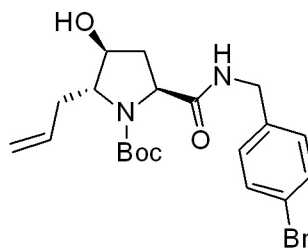

(<sup>13</sup>C NMR, 100 MHz, CD<sub>3</sub>OD)

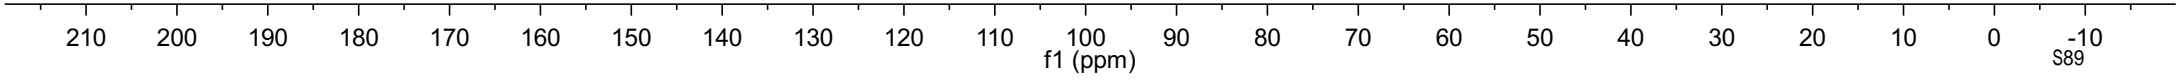

7.378  
7.372  
7.364  
7.331  
7.323

5.147  
4.561  
4.531  
4.514  
4.486  
4.456  
4.252  
4.241  
4.219  
4.204  
4.178  
4.041  
3.608  
3.600  
3.596  
3.580  
3.572  
3.470  
2.644  
2.637  
2.627  
2.621  
2.609  
2.593  
2.582  
2.571  
2.560  
2.539  
2.525

1.419  
1.396

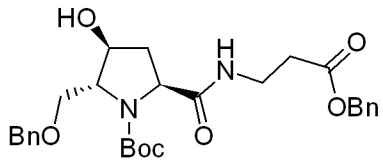

(<sup>1</sup>H NMR, 400 MHz, CD<sub>3</sub>OD)

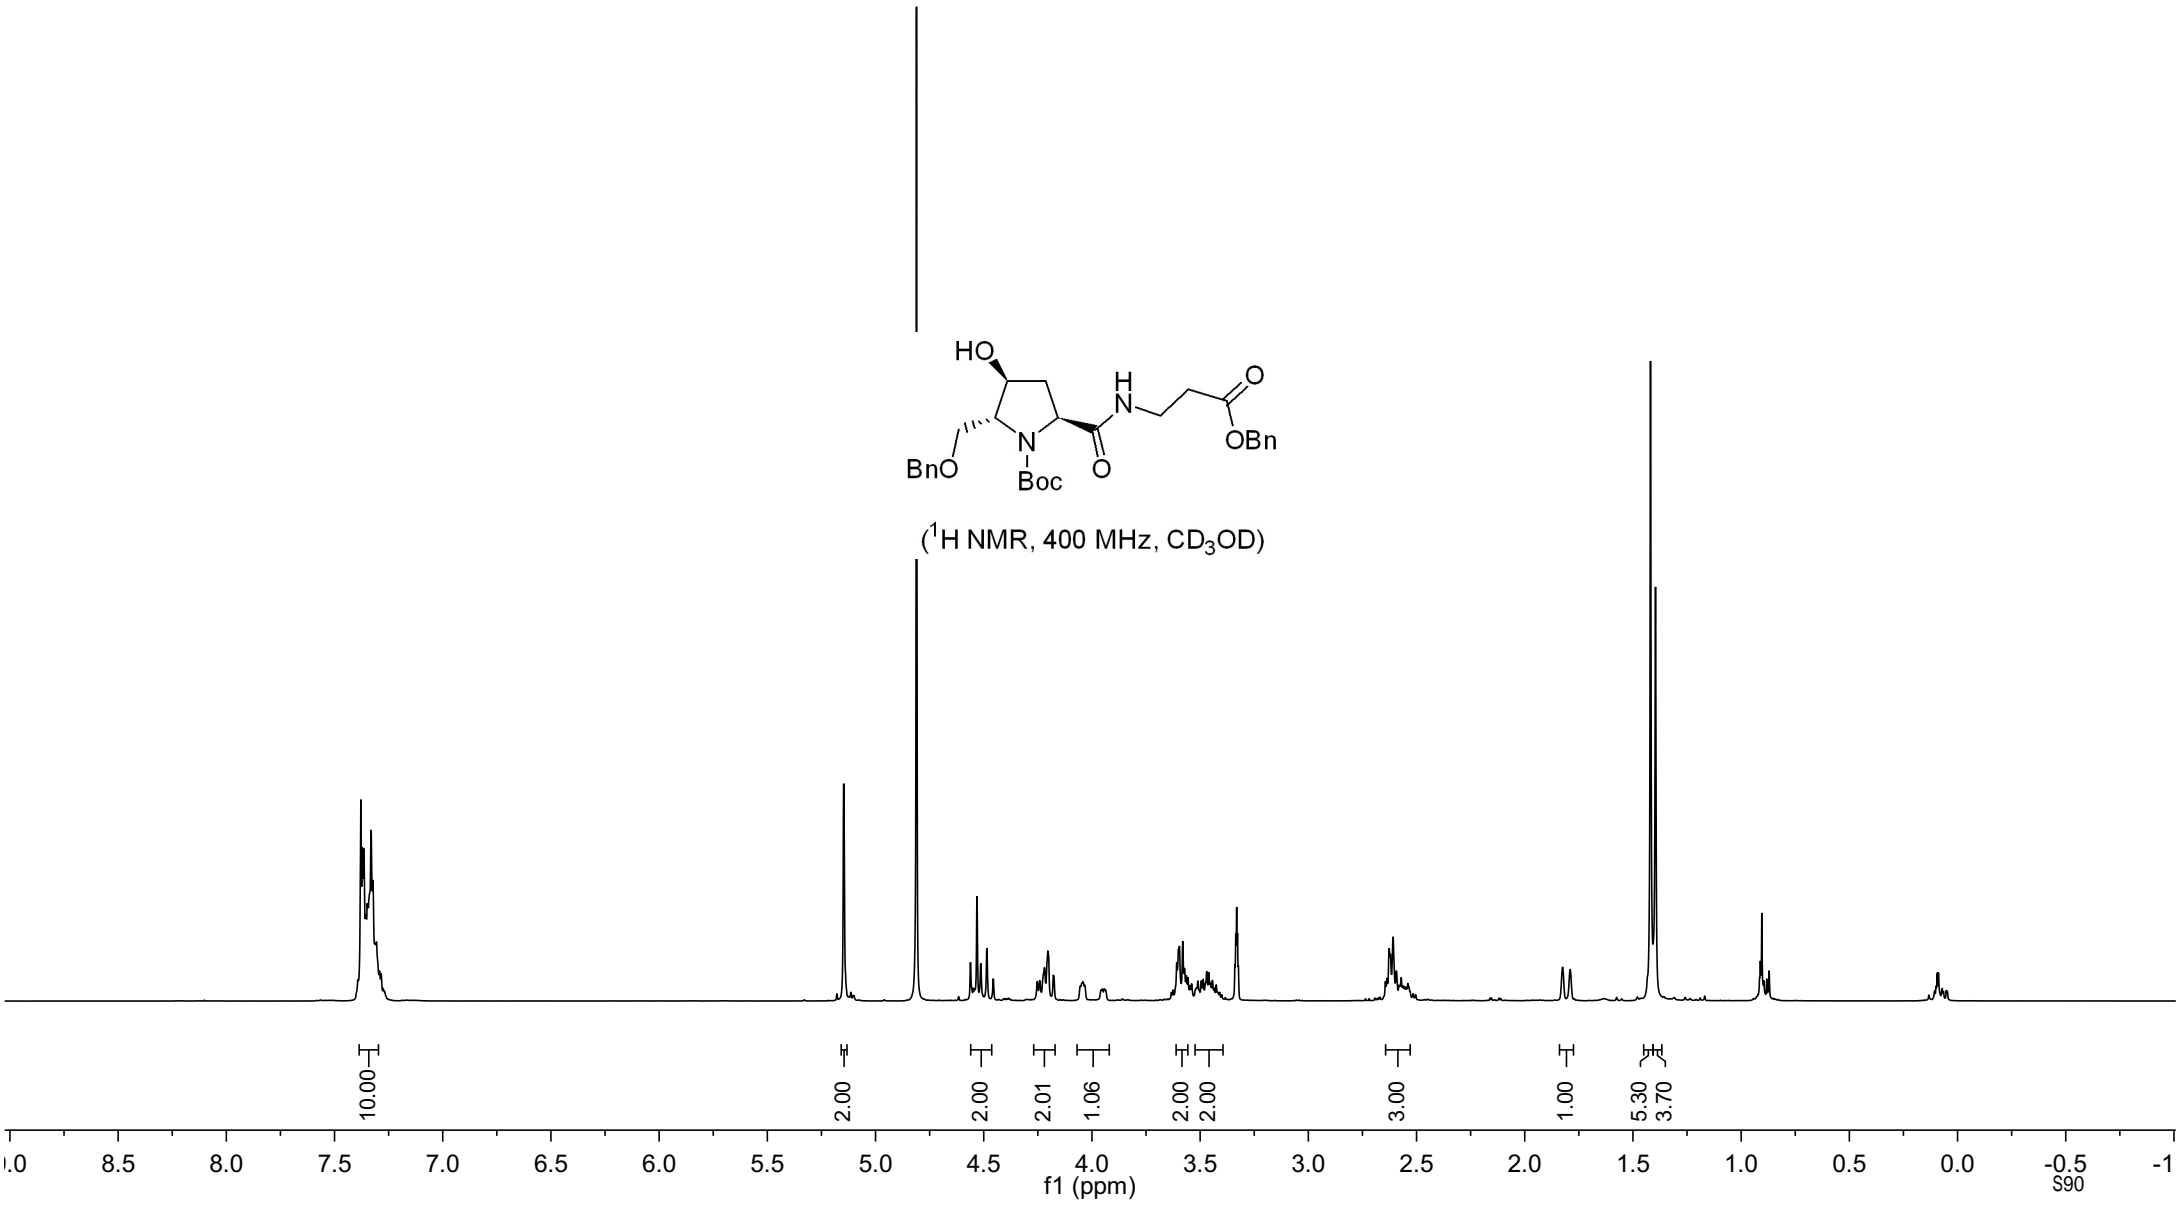

1.0 8.5 8.0 7.5 7.0 6.5 6.0 5.5 5.0 4.5 4.0 3.5 3.0 2.5 2.0 1.5 1.0 0.5 0.0 -0.5 -1  
f1 (ppm)  
S90

176.824  
176.331  
173.185  
173.020

155.758  
155.522

139.667  
139.558  
137.553  
137.483  
129.582  
129.505  
129.427  
129.329  
129.276  
129.253  
129.216  
128.787  
128.711  
128.676

81.977  
81.808

75.283  
74.393  
74.348  
74.274  
70.115  
69.544  
68.870  
68.833  
67.527  
67.450

62.143  
38.383  
37.337  
36.439  
36.376  
34.795  
34.667  
28.681

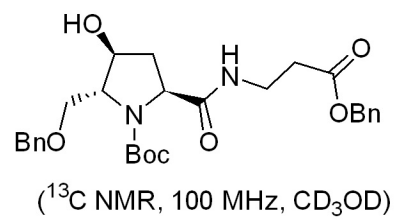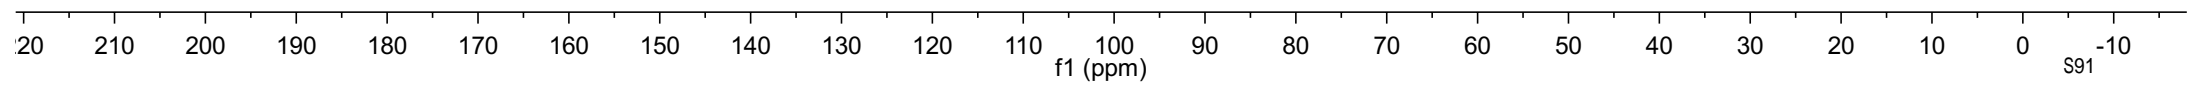



7.502  
7.481  
7.453  
7.281  
7.260

5.321  
5.314  
5.307  
5.190  
5.183  
5.176

4.373  
4.352  
4.333  
4.315  
4.303  
4.266

3.879  
3.846  
3.824  
3.791  
3.682  
3.675  
3.588  
3.580

2.624  
2.604  
2.584  
2.566  
2.545  
2.524

2.181  
2.156  
2.090  
2.066  
2.055  
2.055  
1.361

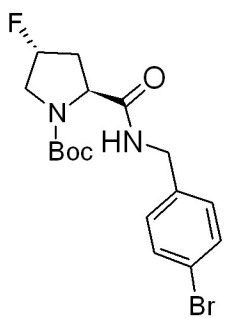

(<sup>1</sup>H NMR, 400 MHz, CD<sub>3</sub>OD)

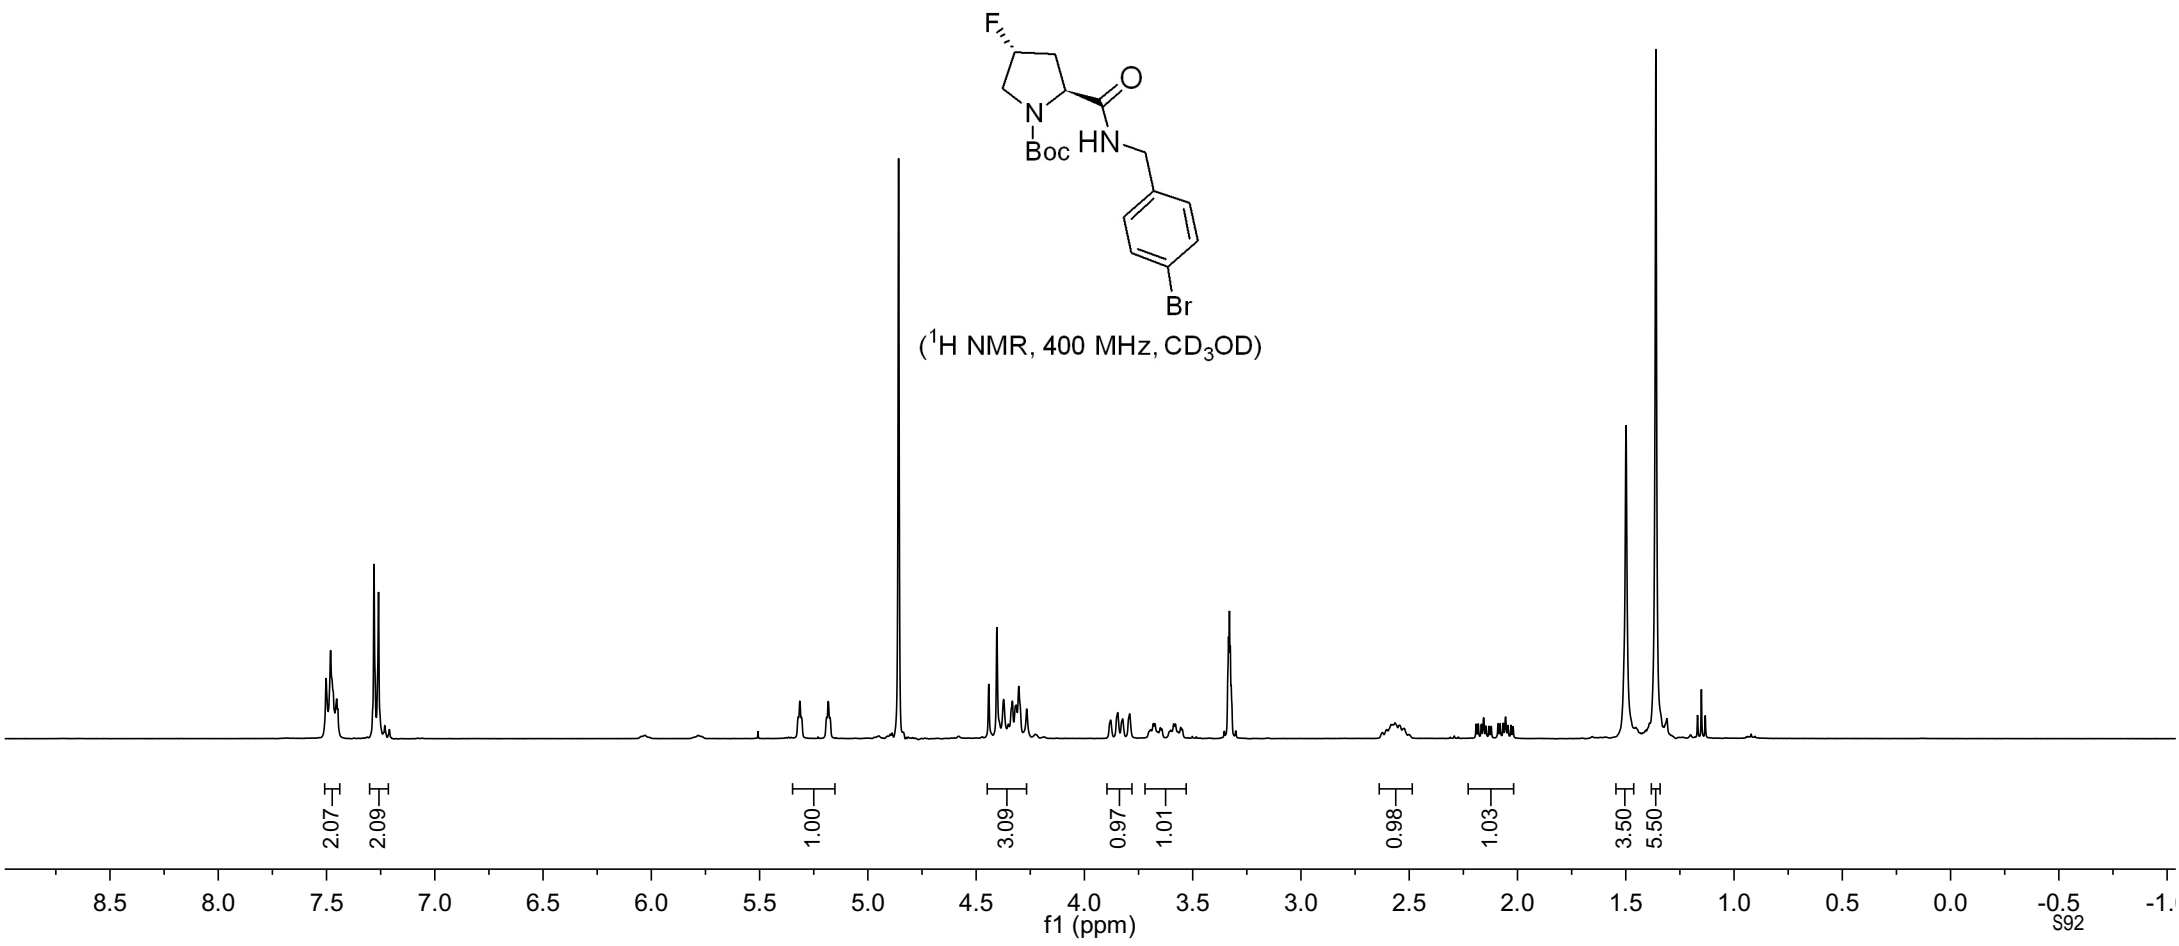

173.456  
173.302

154.762  
154.475

137.725

131.224  
131.051  
129.604  
128.939  
128.674  
120.328

92.780  
92.070  
91.032  
90.315

80.560  
80.353

58.917  
58.737  
53.668  
53.444  
53.245  
53.020

42.154  
41.949  
40.799  
37.843  
37.623  
36.819  
36.222  
27.047

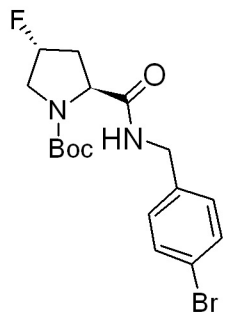

(<sup>13</sup>C NMR, 100 MHz, CD<sub>3</sub>OD)

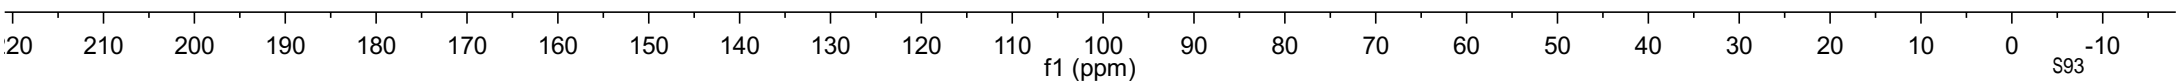

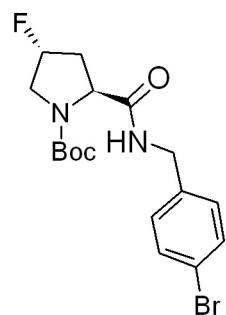

(<sup>19</sup>F NMR, 376 MHz, CD<sub>3</sub>OD)

180.367  
180.924

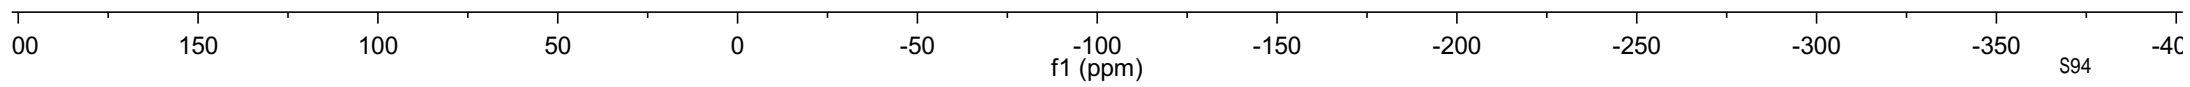

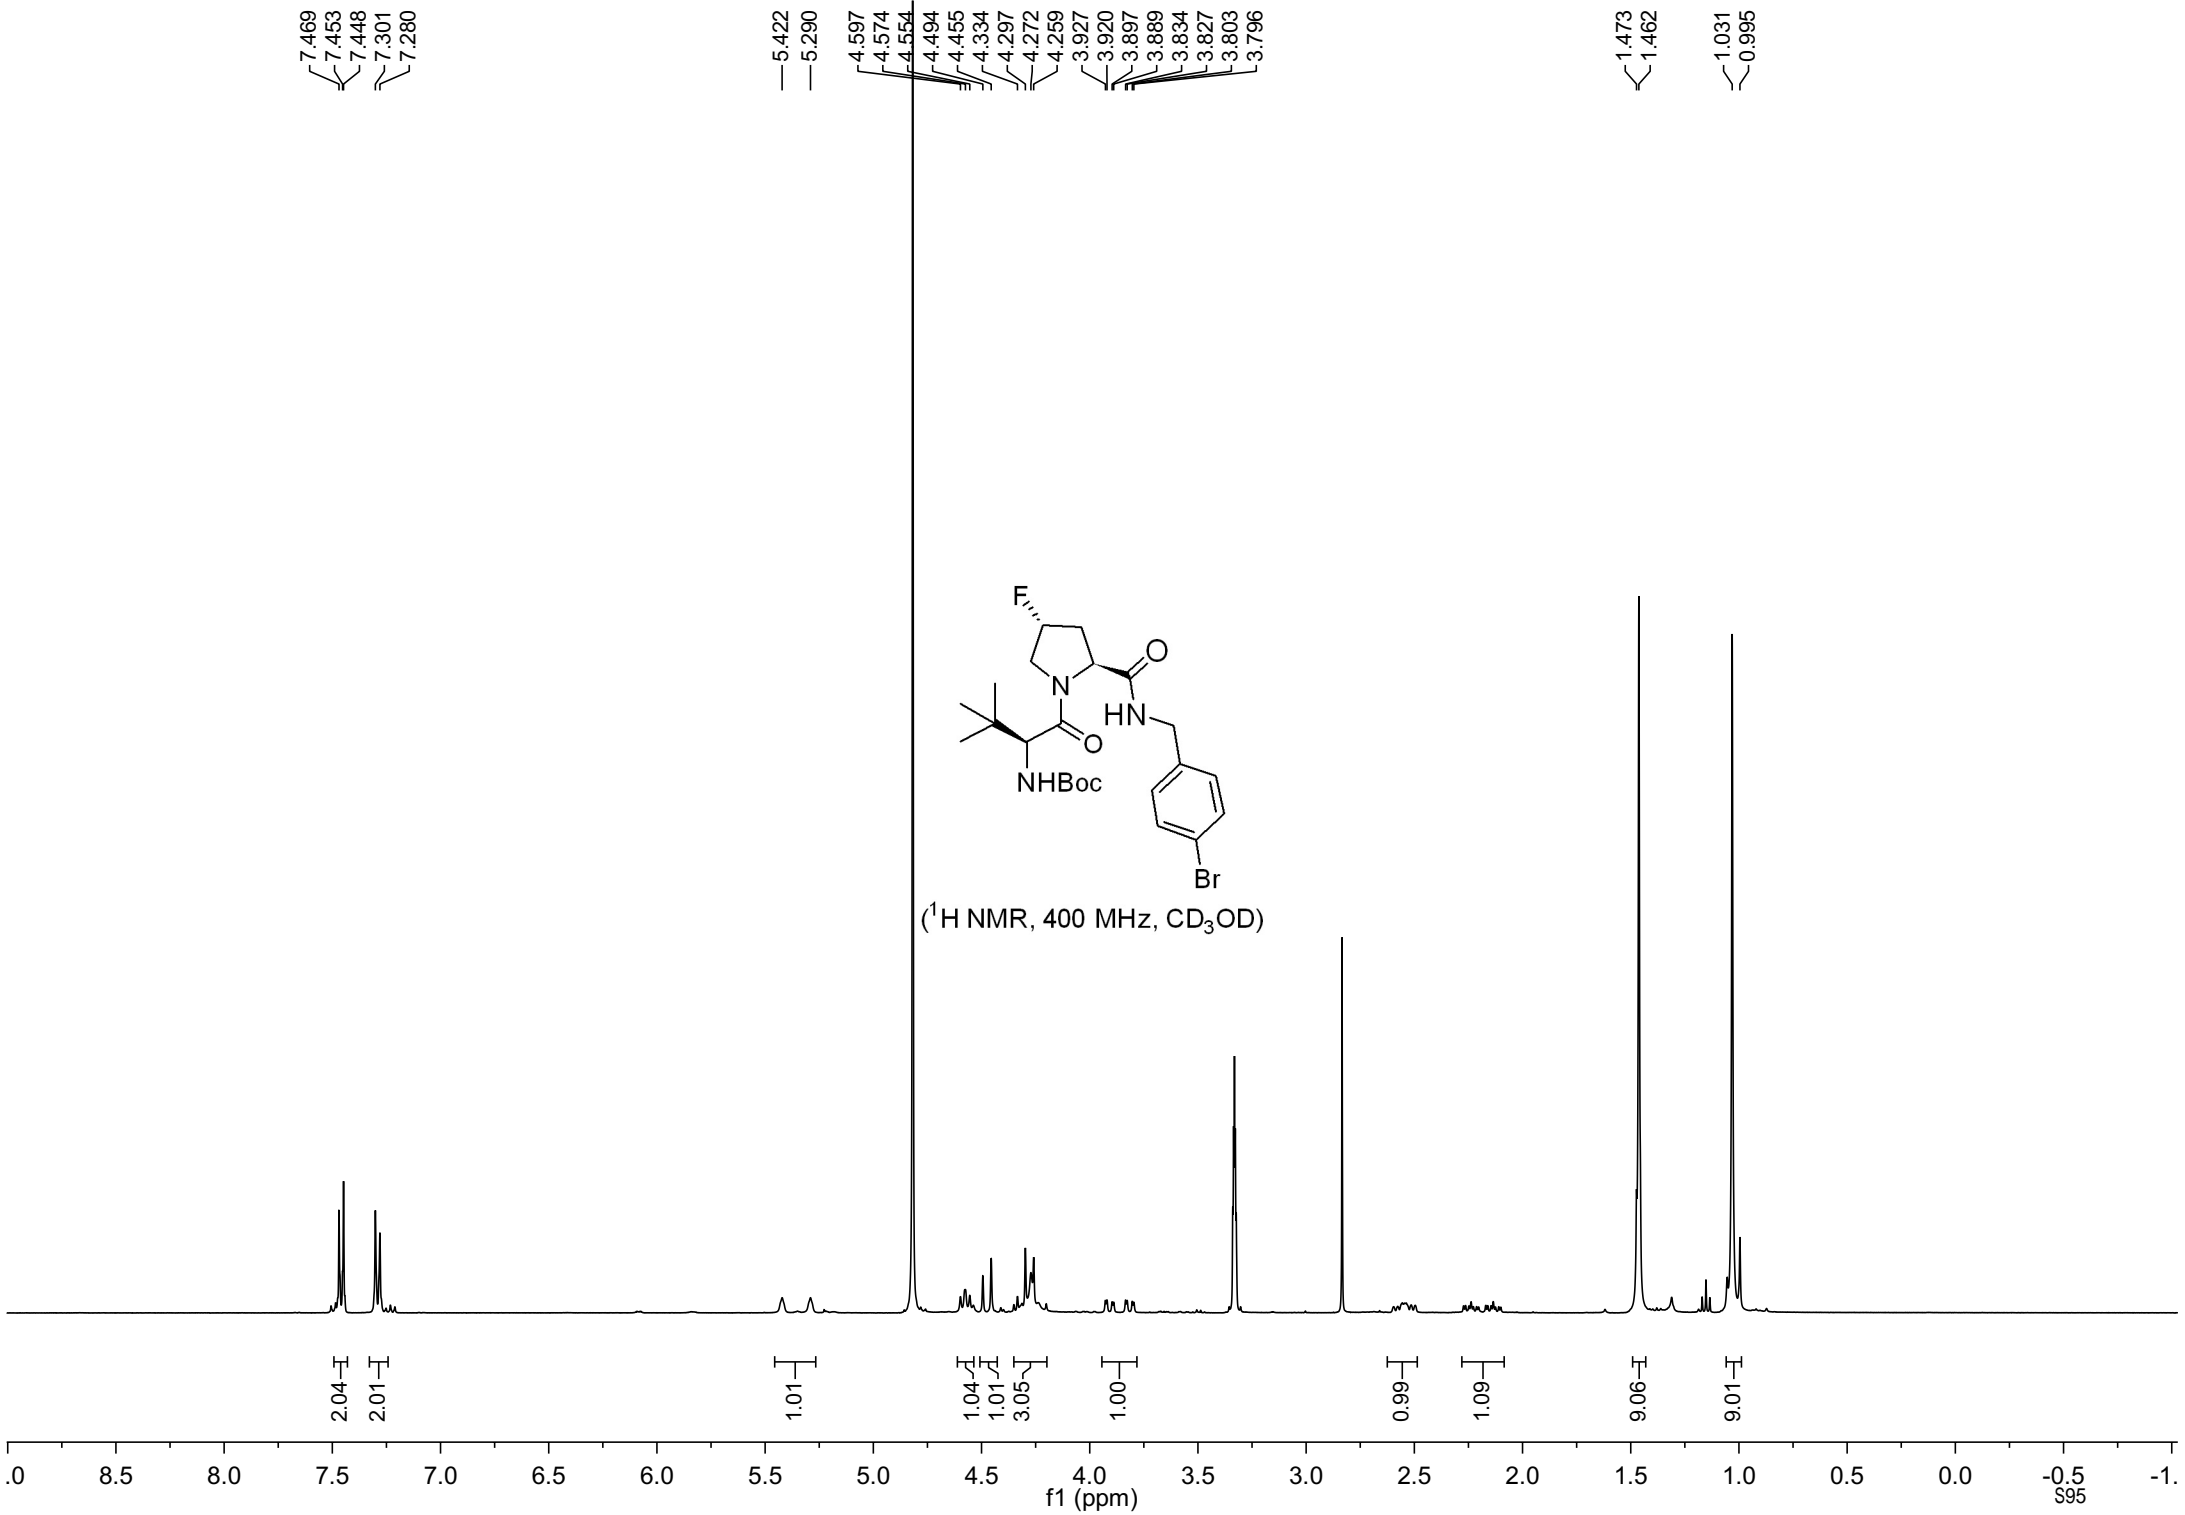

173.791  
173.031

157.893

139.144

132.519  
130.421

121.785

94.348  
92.564

80.769

60.477  
56.331  
56.108

43.513  
38.899  
37.309  
37.091  
36.595  
28.833  
28.688  
26.870  
26.710

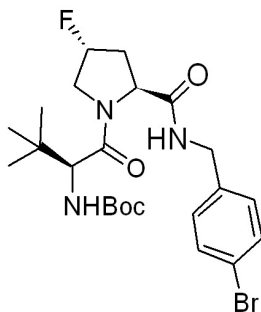

(<sup>13</sup>C NMR, 100 MHz, CD<sub>3</sub>OD)

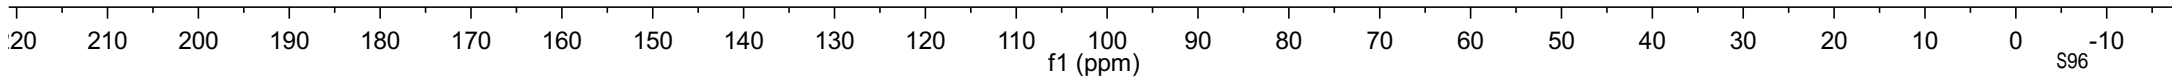

-178.832  
-178.981

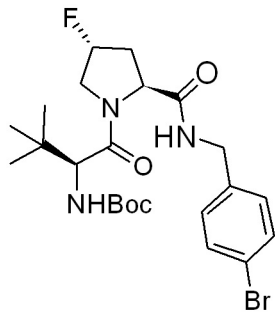

(<sup>19</sup>F NMR, 376 MHz, CD<sub>3</sub>OD)

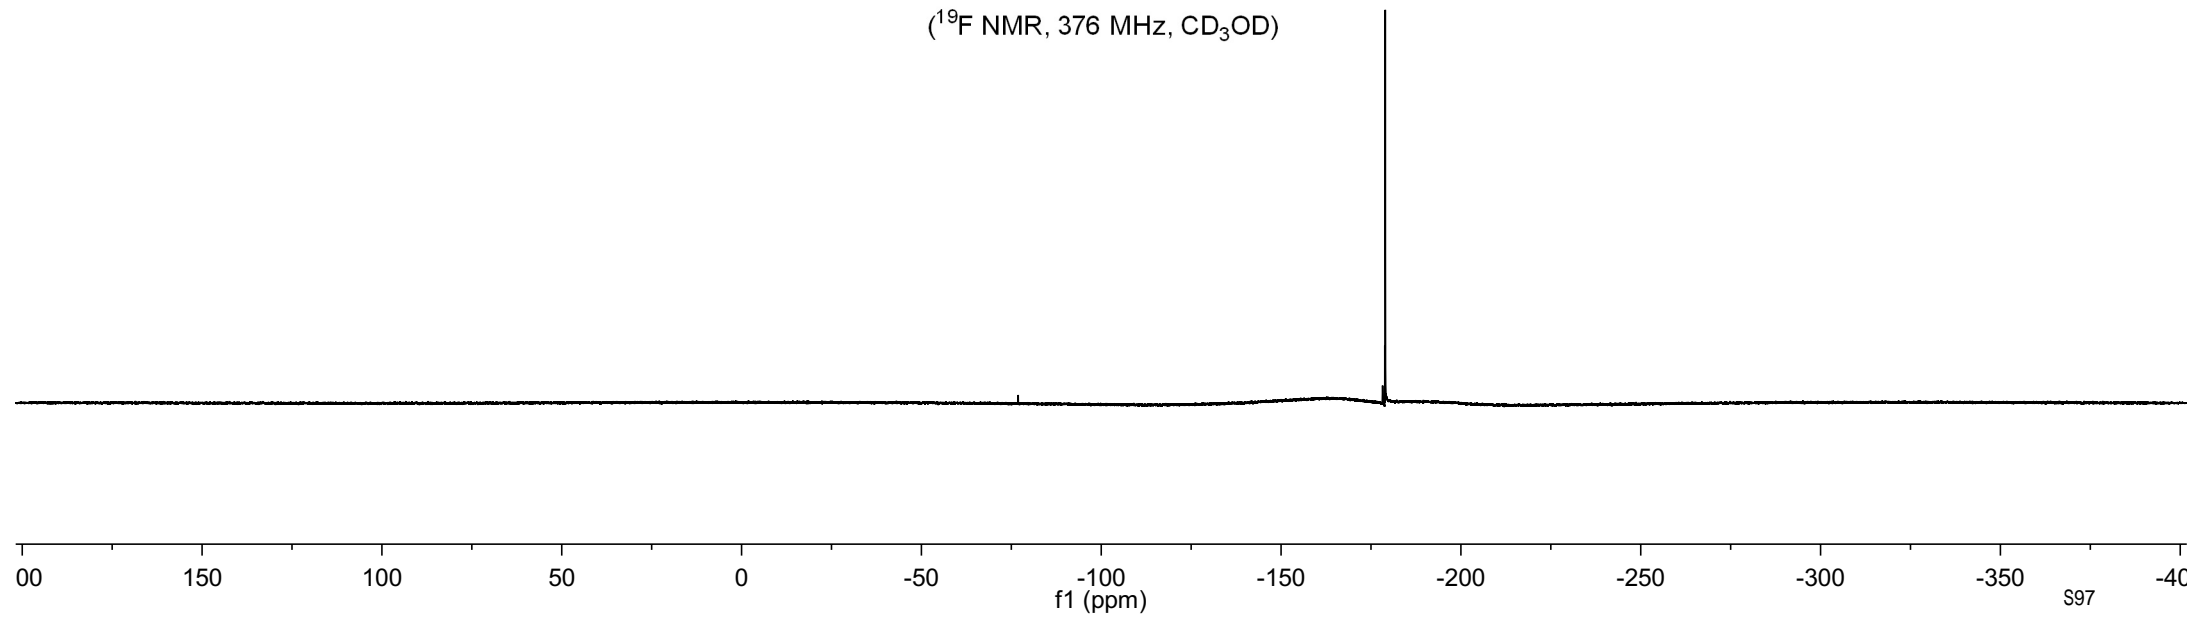

7.462  
7.445  
7.441  
7.306  
7.285

5.413  
5.406  
5.275  
5.268

4.574  
4.564  
4.556  
4.550  
4.506  
4.467  
4.288  
4.249  
3.921  
3.898  
3.890  
3.835  
3.828  
3.804  
3.797

2.574  
2.556  
2.535  
2.525  
2.516  
2.494  
2.475  
2.264  
2.255  
2.239  
2.015

1.058  
1.010

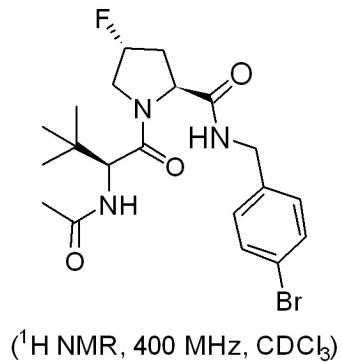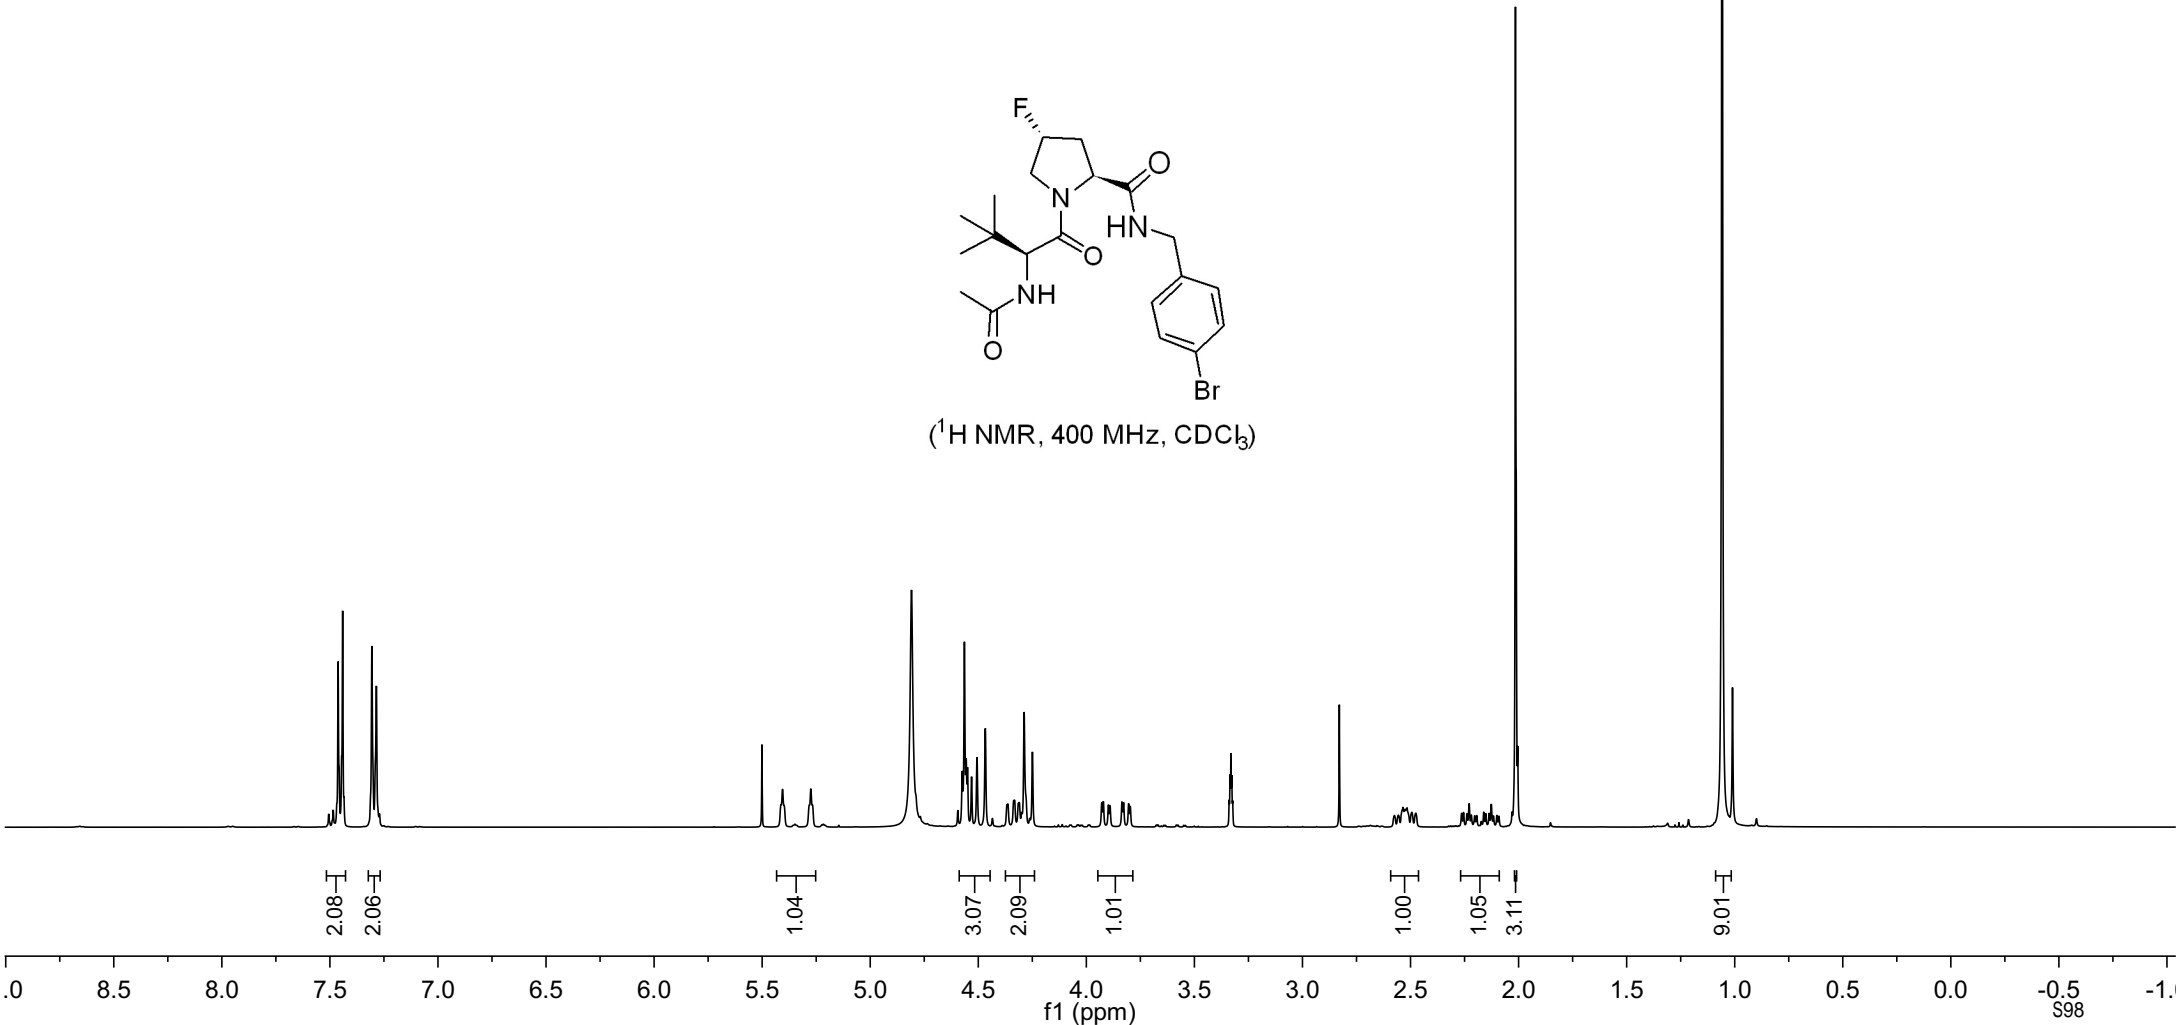

10.0 8.5 8.0 7.5 7.0 6.5 6.0 5.5 5.0 4.5 4.0 3.5 3.0 2.5 2.0 1.5 1.0 0.5 0.0 -0.5 -1.0  
f1 (ppm)  
S98

175.159  
173.790  
173.316  
173.148  
172.470  
172.270

139.194  
138.920  
132.698  
132.515  
130.957  
130.453  
122.107  
121.785

94.367  
92.732  
92.600  
90.981

60.509  
60.404  
59.524  
58.465  
56.369  
56.144  
54.816  
54.580  
44.130  
43.524  
38.930  
37.451  
37.365  
37.147  
36.978  
26.887  
22.561  
22.230

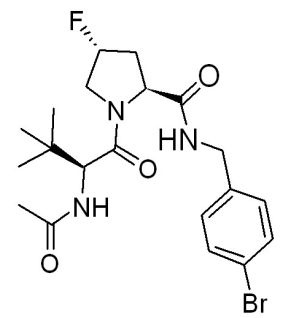

(<sup>13</sup>C NMR, 100 MHz, CD<sub>3</sub>OD)

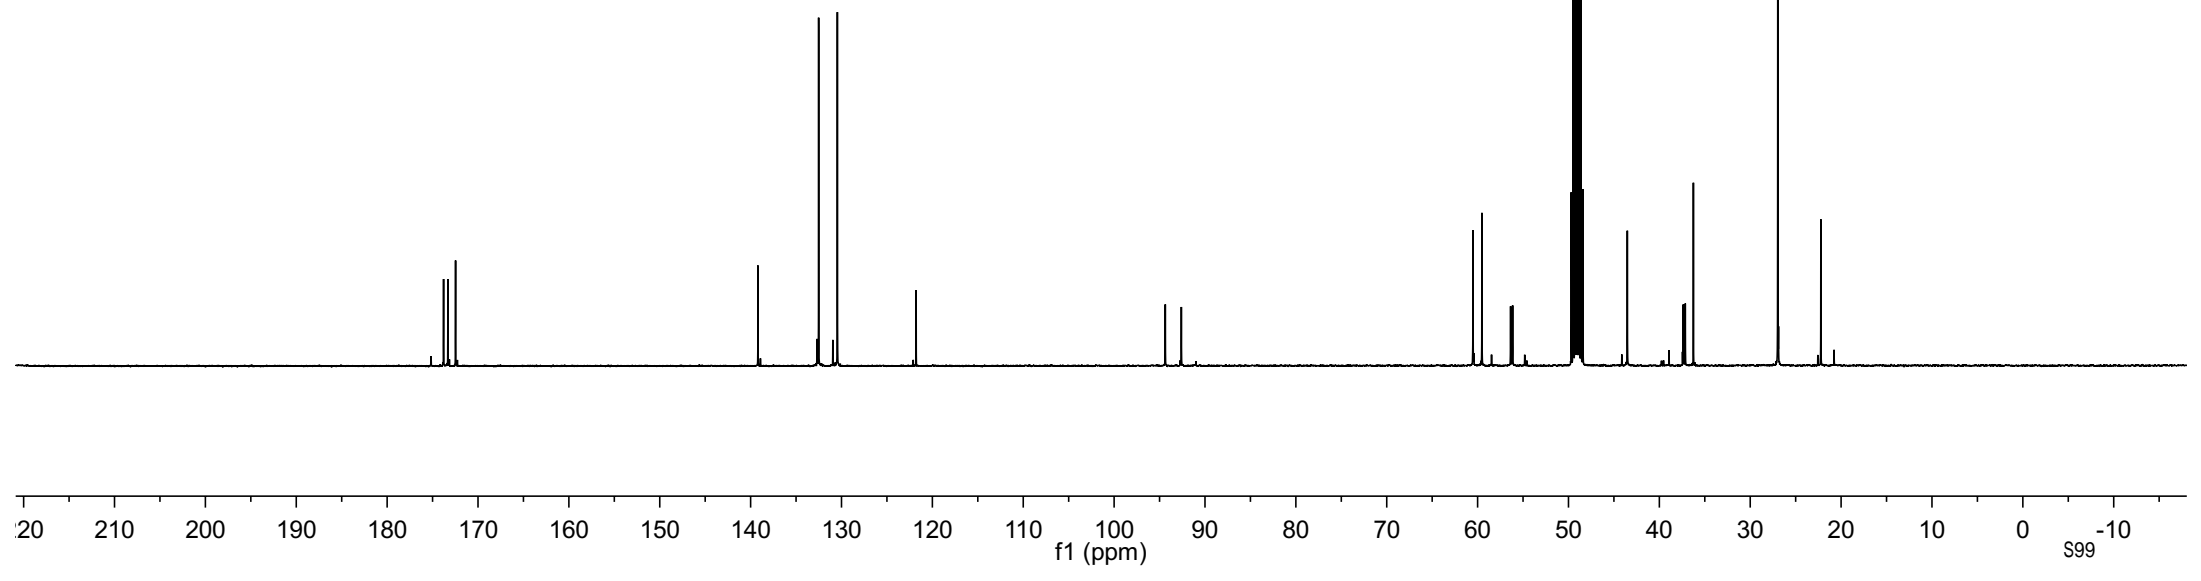



-178.708  
-178.806

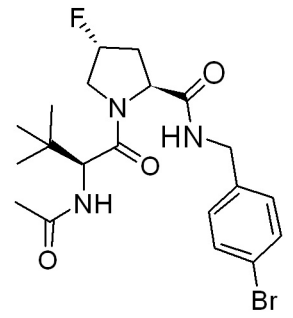

(<sup>19</sup>F NMR, 376 MHz, CD<sub>3</sub>OD)

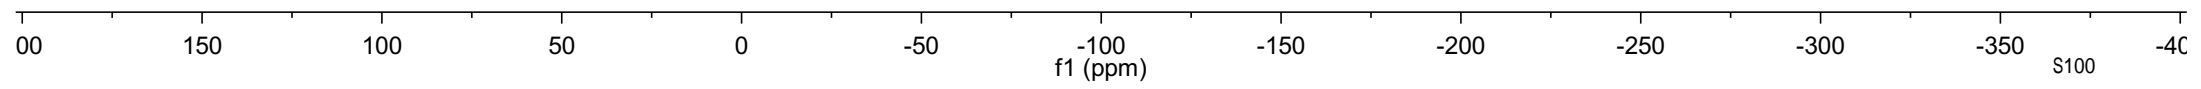

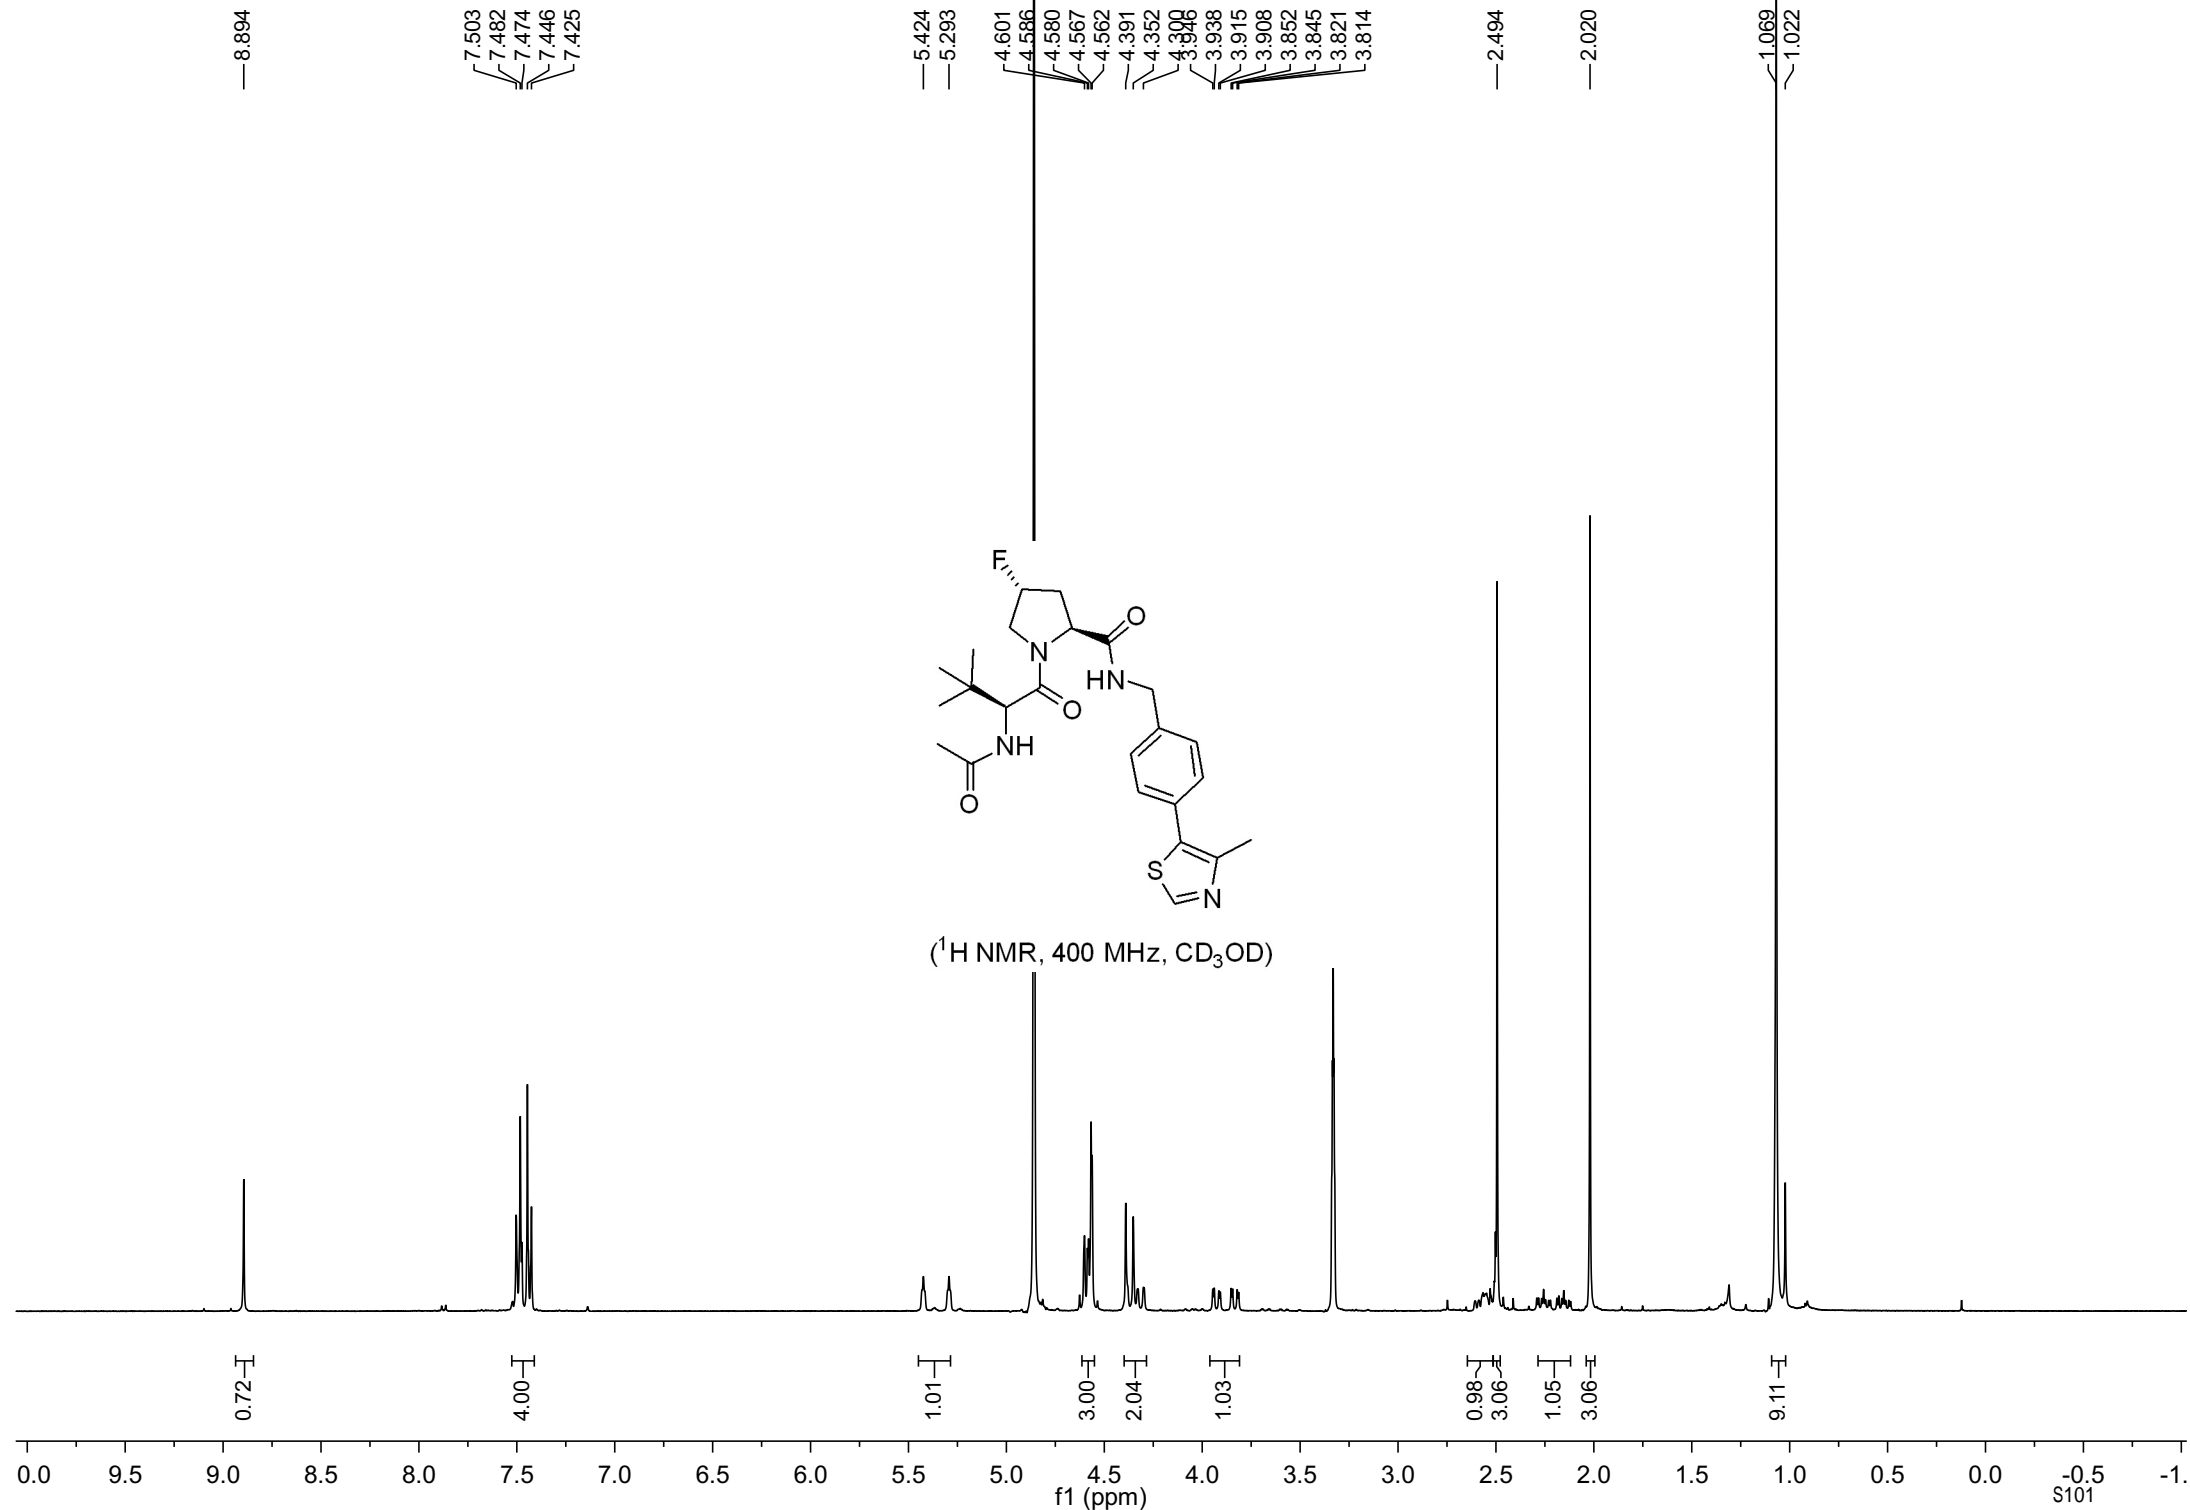

173.858  
173.360  
172.487

152.838  
149.090

140.202

131.588  
130.399  
129.013

94.380  
92.613

60.545  
59.570  
56.380  
56.156

43.785  
37.397  
37.179  
36.239

26.959

22.169

15.803

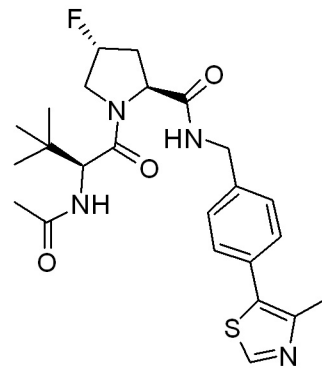

(<sup>13</sup>C NMR, 100 MHz, CD<sub>3</sub>OD)

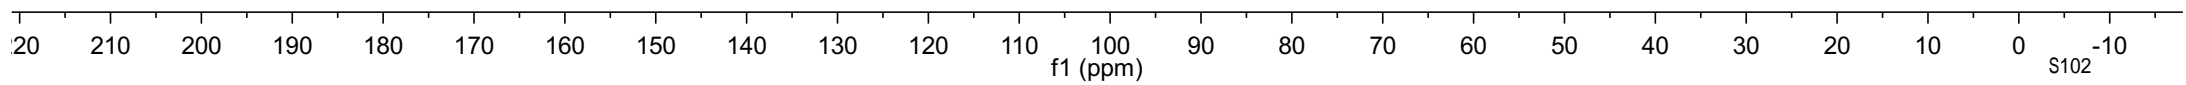

---178.805

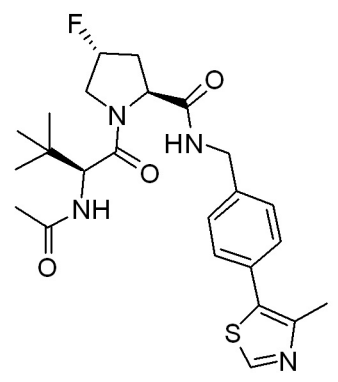

(<sup>19</sup>F NMR, 376 MHz, CD<sub>3</sub>OD)

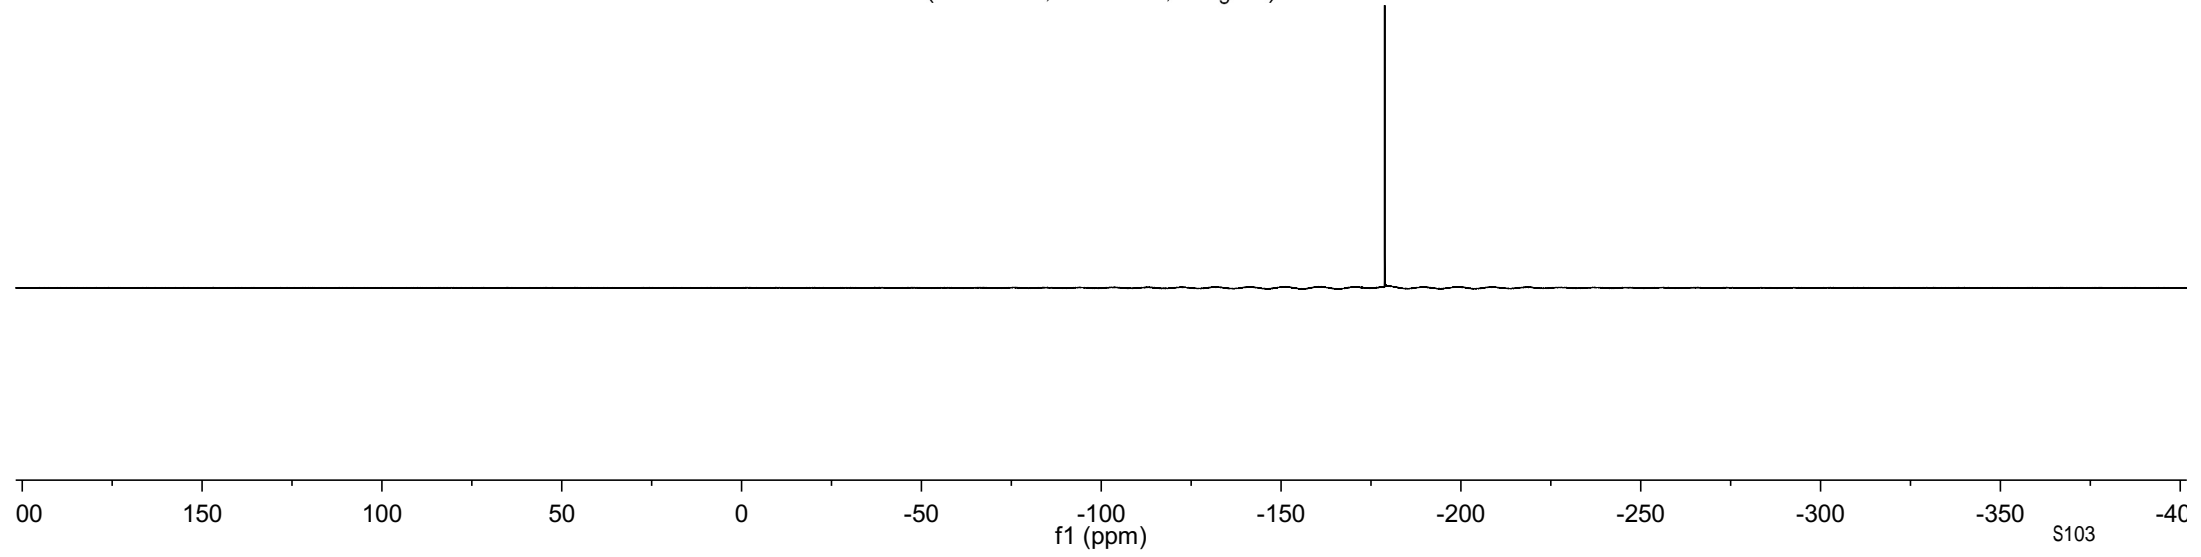

7.341  
7.325  
7.320  
7.279  
7.257

4.301  
4.281  
3.970  
3.946  
3.928  
3.623  
3.602  
3.581  
3.560  
3.540

2.374  
2.348  
2.324  
2.258

1.484  
1.384

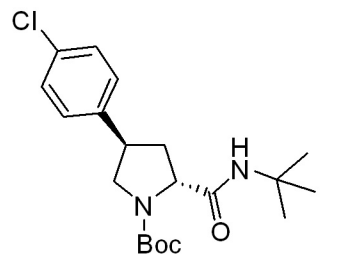

(<sup>1</sup>H NMR, 400 MHz, CD<sub>3</sub>OD)

2.00  
2.00

1.00

1.00

1.00

1.00

2.00

9.00

9.00

8.5 8.0 7.5 7.0 6.5 6.0 5.5 5.0 4.5 4.0 3.5 3.0 2.5 2.0 1.5 1.0 0.5 0.0 -0.5 -1.0

f1 (ppm)

S104

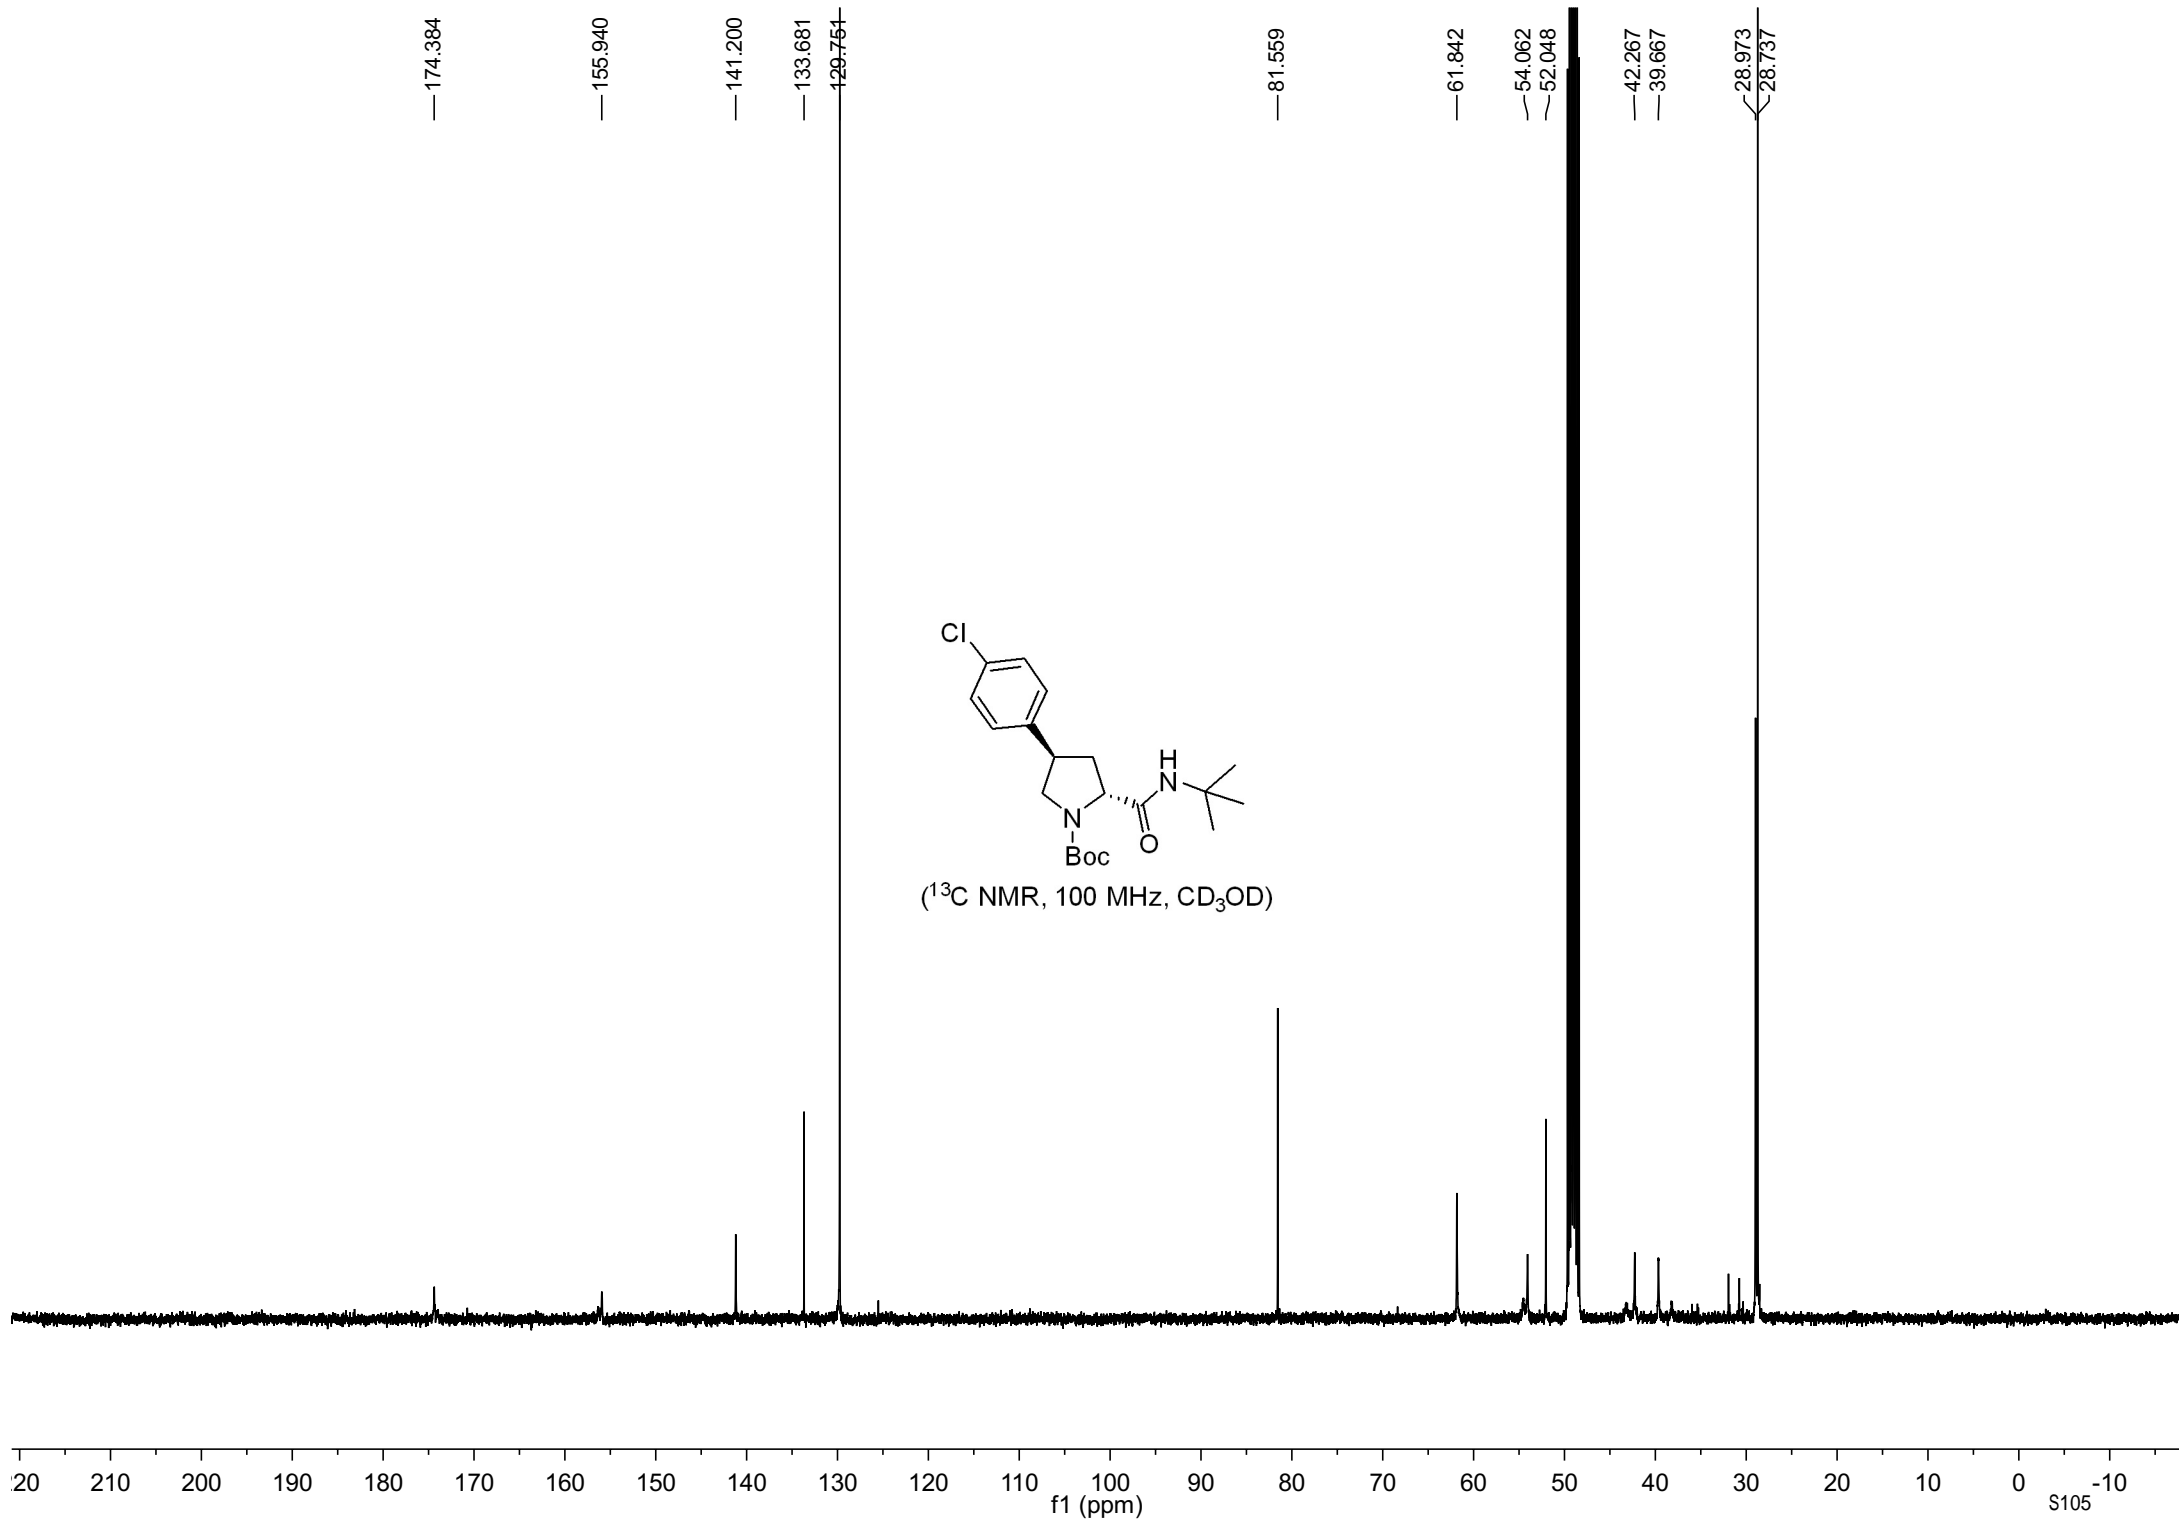

298K

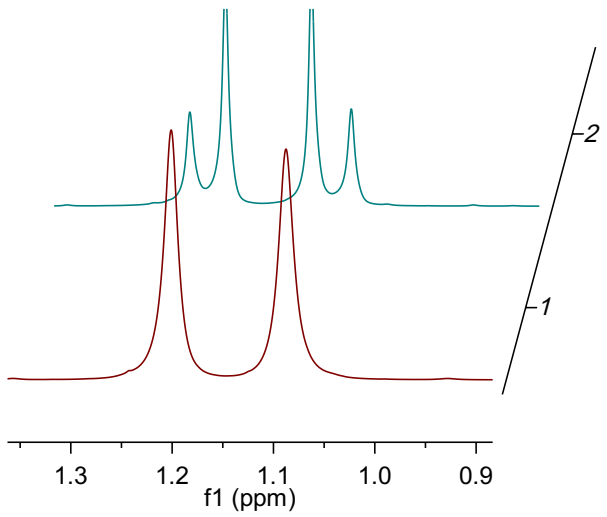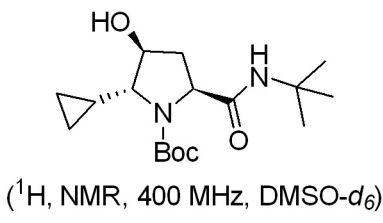

333K

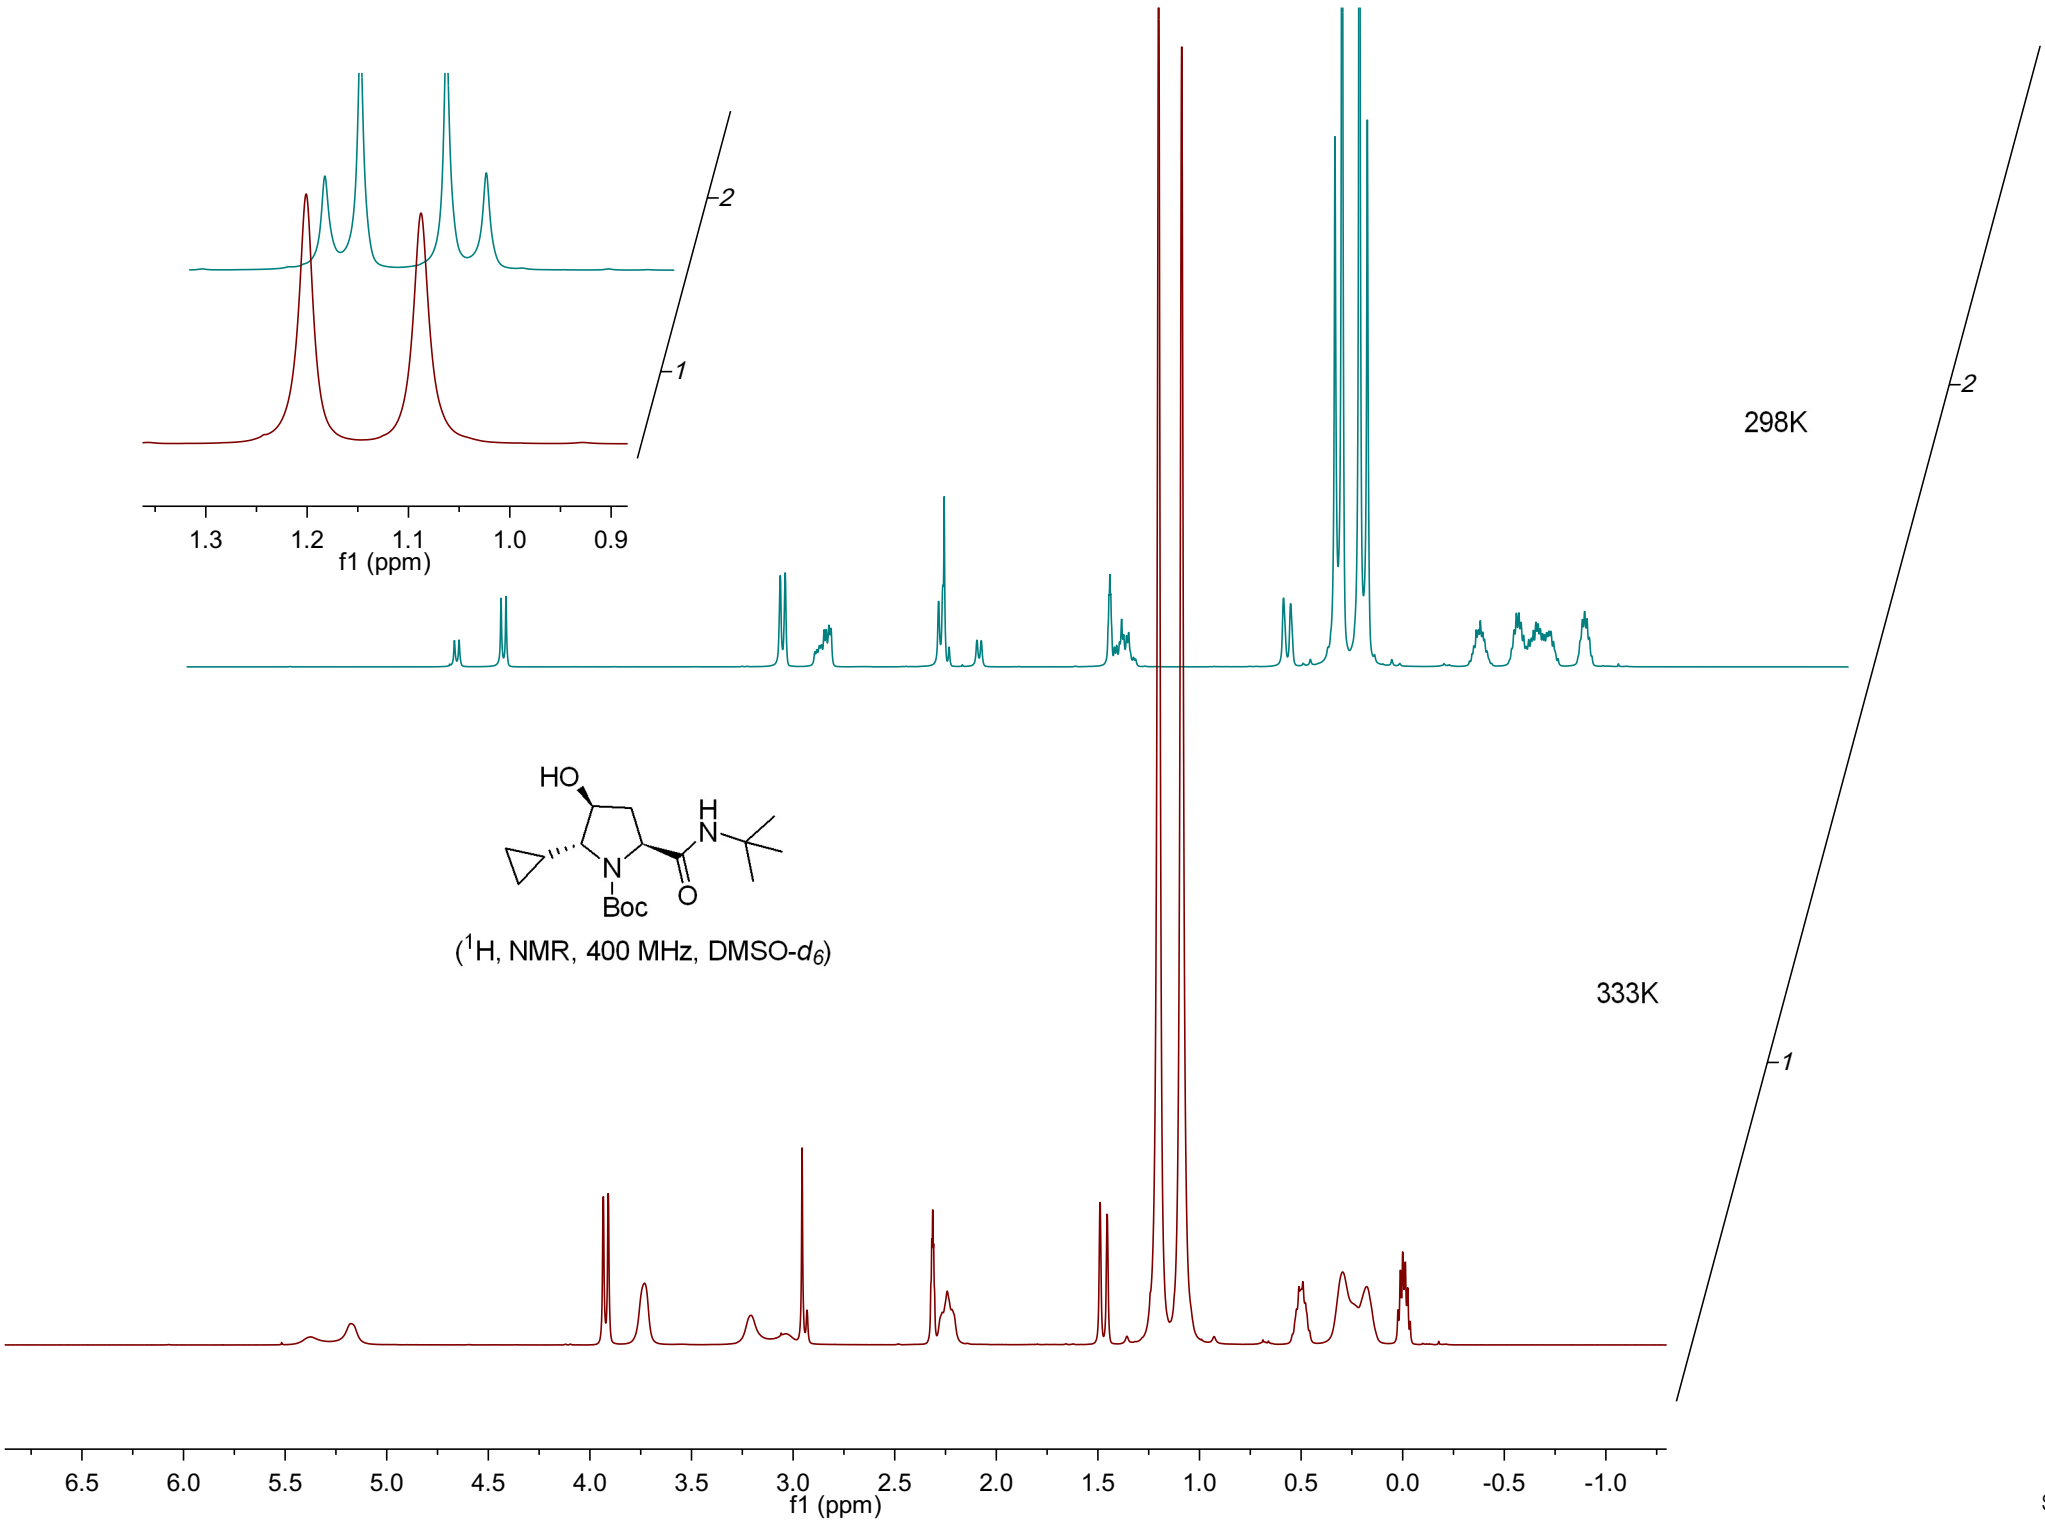

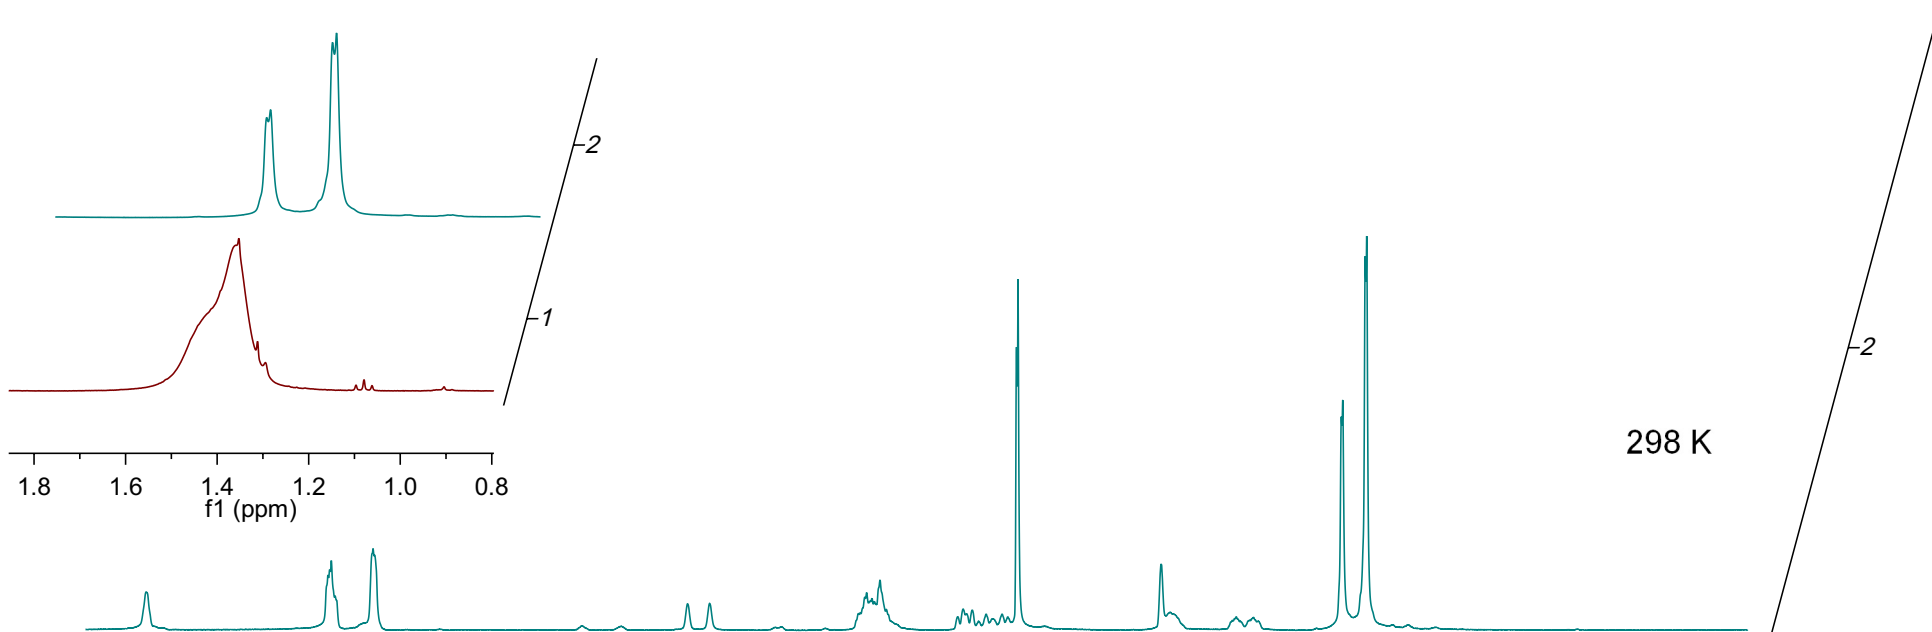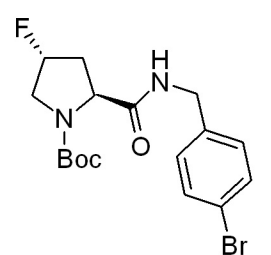

(<sup>1</sup>H NMR, 400 MHz, DMSO-d<sub>6</sub>)

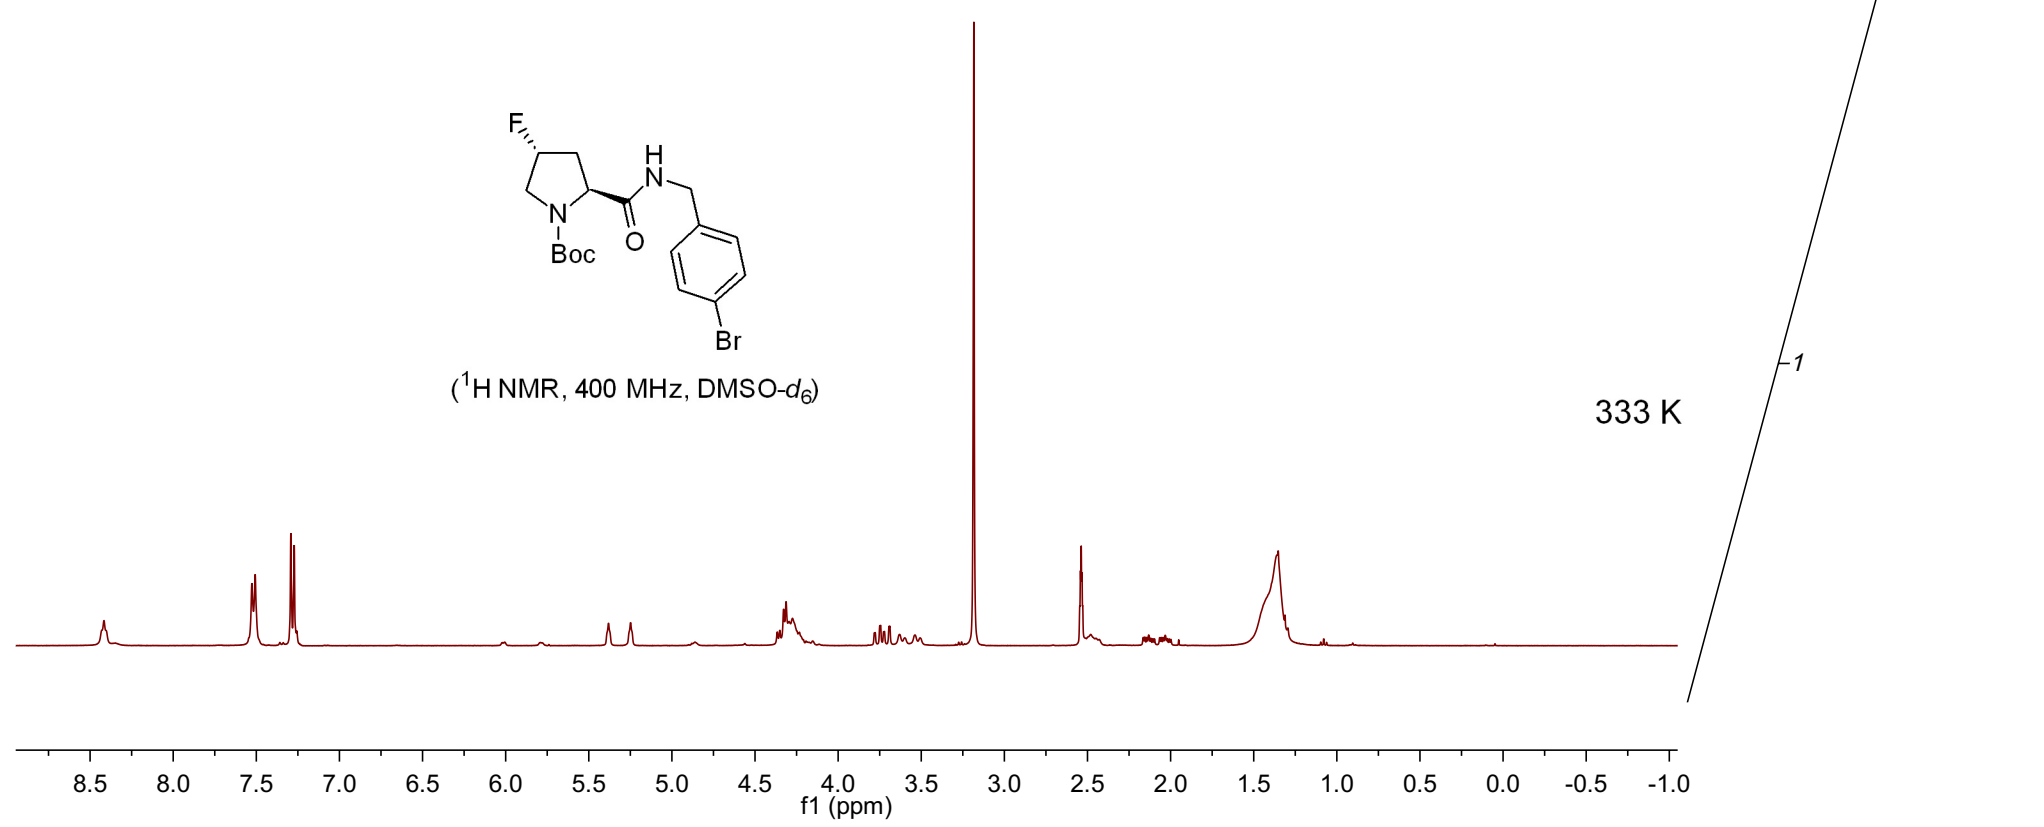



ORTEP drawing of the X-ray crystallographic structure of **60**

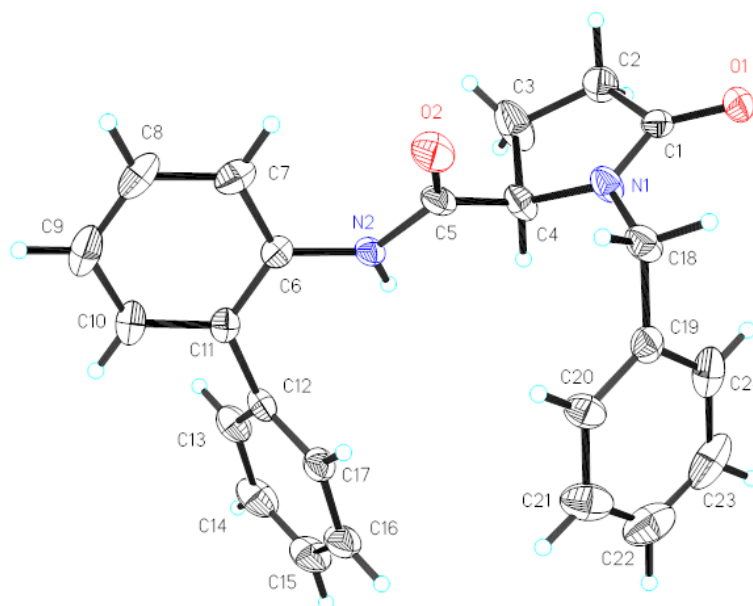

The single crystal of compound **60** was prepared from its solution in petroleum ether/ethylacetate (1:1) by slow evaporation of the solvent.

CCDC 2089259. For detailed crystallographic data, please refer to the Cambridge Crystallographic Data Centre at <http://ccdc.cam.ac.uk>.

Table 1. Crystal data and structure refinement for dd20119.

|                                 |                                                               |          |
|---------------------------------|---------------------------------------------------------------|----------|
| Identification code             | dd20119                                                       |          |
| Empirical formula               | C <sub>24</sub> H <sub>22</sub> N <sub>2</sub> O <sub>2</sub> |          |
| Formula weight                  | 370.43                                                        |          |
| Temperature                     | 192(2) K                                                      |          |
| Wavelength                      | 0.71073 Å                                                     |          |
| Crystal system                  | Orthorhombic                                                  |          |
| Space group                     | P n a 21                                                      |          |
| Unit cell dimensions            | a = 9.8421(19) Å                                              | α = 90°. |
|                                 | b = 19.150(4) Å                                               | β = 90°. |
|                                 | c = 10.450(2) Å                                               | γ = 90°. |
| Volume                          | 1969.5(7) Å <sup>3</sup>                                      |          |
| Z                               | 4                                                             |          |
| Density (calculated)            | 1.249 Mg/m <sup>3</sup>                                       |          |
| Absorption coefficient          | 0.080 mm <sup>-1</sup>                                        |          |
| F(000)                          | 784                                                           |          |
| Crystal size                    | 0.200 x 0.100 x 0.060 mm <sup>3</sup>                         |          |
| Theta range for data collection | 2.220 to 25.495°.                                             |          |

|                                   |                                             |
|-----------------------------------|---------------------------------------------|
| Index ranges                      | -11<=h<=9, -23<=k<=22, -12<=l<=12           |
| Reflections collected             | 8842                                        |
| Independent reflections           | 3627 [R(int) = 0.0496]                      |
| Completeness to theta = 25.242°   | 99.8 %                                      |
| Absorption correction             | Semi-empirical from equivalents             |
| Max. and min. transmission        | 0.7456 and 0.6421                           |
| Refinement method                 | Full-matrix least-squares on F <sup>2</sup> |
| Data / restraints / parameters    | 3627 / 1 / 258                              |
| Goodness-of-fit on F <sup>2</sup> | 1.094                                       |
| Final R indices [I>2sigma(I)]     | R1 = 0.0544, wR2 = 0.0999                   |
| R indices (all data)              | R1 = 0.0915, wR2 = 0.1203                   |
| Absolute structure parameter      | -0.4(10)                                    |
| Extinction coefficient            | 0.018(2)                                    |
| Largest diff. peak and hole       | 0.186 and -0.170 e.Å <sup>-3</sup>          |

Table 2. Atomic coordinates (x 10<sup>4</sup>) and equivalent isotropic displacement parameters (Å<sup>2</sup>x 10<sup>3</sup>) for dd20119. U(eq) is defined as one third of the trace of the orthogonalized U<sup>ij</sup> tensor.

|       | x       | y       | z       | U(eq) |
|-------|---------|---------|---------|-------|
| O(1)  | -253(3) | 4177(2) | 802(3)  | 51(1) |
| O(2)  | 3280(4) | 5659(2) | 2262(3) | 62(1) |
| N(1)  | 1185(4) | 4652(2) | 2267(4) | 46(1) |
| N(2)  | 2810(4) | 5923(2) | 4349(3) | 34(1) |
| C(1)  | 70(5)   | 4649(2) | 1536(4) | 39(1) |
| C(2)  | -670(5) | 5317(2) | 1740(5) | 53(1) |
| C(3)  | 96(7)   | 5715(3) | 2694(6) | 83(2) |
| C(4)  | 1219(5) | 5221(2) | 3193(5) | 46(1) |
| C(5)  | 2553(5) | 5610(2) | 3201(4) | 42(1) |
| C(6)  | 3833(4) | 6424(2) | 4603(4) | 36(1) |
| C(7)  | 4380(5) | 6836(2) | 3639(5) | 50(1) |
| C(8)  | 5319(6) | 7344(2) | 3921(6) | 64(2) |
| C(9)  | 5717(6) | 7463(3) | 5170(7) | 70(2) |
| C(10) | 5167(5) | 7058(2) | 6128(5) | 52(1) |
| C(11) | 4239(4) | 6527(2) | 5867(4) | 38(1) |
| C(12) | 3763(4) | 6098(2) | 6974(4) | 39(1) |
| C(13) | 3107(5) | 6414(3) | 8003(4) | 52(1) |
| C(14) | 2829(6) | 6037(4) | 9097(5) | 66(2) |
| C(15) | 3163(6) | 5344(3) | 9171(5) | 65(2) |

|       |         |         |         |       |
|-------|---------|---------|---------|-------|
| C(16) | 3800(5) | 5022(3) | 8163(5) | 56(1) |
| C(17) | 4094(5) | 5395(2) | 7058(4) | 44(1) |
| C(18) | 2152(5) | 4072(2) | 2316(4) | 50(1) |
| C(19) | 2165(5) | 3712(2) | 3592(5) | 45(1) |
| C(20) | 3263(5) | 3784(3) | 4409(5) | 49(1) |
| C(21) | 3295(7) | 3465(3) | 5591(5) | 68(2) |
| C(22) | 2237(9) | 3067(3) | 5975(7) | 82(2) |
| C(23) | 1134(8) | 2973(3) | 5180(8) | 85(2) |
| C(24) | 1075(6) | 3309(3) | 4000(6) | 67(2) |

Table 3. Bond lengths [Å] and angles [°] for dd20119.

|             |          |
|-------------|----------|
| O(1)-C(1)   | 1.227(5) |
| O(2)-C(5)   | 1.218(5) |
| N(1)-C(1)   | 1.337(5) |
| N(1)-C(4)   | 1.457(5) |
| N(1)-C(18)  | 1.464(5) |
| N(2)-C(5)   | 1.366(5) |
| N(2)-C(6)   | 1.415(5) |
| N(2)-H(2)   | 0.92(5)  |
| C(1)-C(2)   | 1.487(6) |
| C(2)-C(3)   | 1.464(7) |
| C(2)-H(2A)  | 0.9900   |
| C(2)-H(2B)  | 0.9900   |
| C(3)-C(4)   | 1.546(7) |
| C(3)-H(3A)  | 0.9900   |
| C(3)-H(3B)  | 0.9900   |
| C(4)-C(5)   | 1.509(7) |
| C(4)-H(4)   | 1.0000   |
| C(6)-C(7)   | 1.389(6) |
| C(6)-C(11)  | 1.394(6) |
| C(7)-C(8)   | 1.374(7) |
| C(7)-H(7)   | 0.9500   |
| C(8)-C(9)   | 1.382(8) |
| C(8)-H(8)   | 0.9500   |
| C(9)-C(10)  | 1.377(7) |
| C(9)-H(9)   | 0.9500   |
| C(10)-C(11) | 1.394(6) |

|                 |          |
|-----------------|----------|
| C(10)-H(10)     | 0.9500   |
| C(11)-C(12)     | 1.494(6) |
| C(12)-C(17)     | 1.388(6) |
| C(12)-C(13)     | 1.393(6) |
| C(13)-C(14)     | 1.379(7) |
| C(13)-H(13)     | 0.9500   |
| C(14)-C(15)     | 1.370(7) |
| C(14)-H(14)     | 0.9500   |
| C(15)-C(16)     | 1.373(8) |
| C(15)-H(15)     | 0.9500   |
| C(16)-C(17)     | 1.388(6) |
| C(16)-H(16)     | 0.9500   |
| C(17)-H(17)     | 0.9500   |
| C(18)-C(19)     | 1.501(6) |
| C(18)-H(18A)    | 0.9900   |
| C(18)-H(18B)    | 0.9900   |
| C(19)-C(20)     | 1.384(6) |
| C(19)-C(24)     | 1.388(7) |
| C(20)-C(21)     | 1.378(7) |
| C(20)-H(20)     | 0.9500   |
| C(21)-C(22)     | 1.350(8) |
| C(21)-H(21)     | 0.9500   |
| C(22)-C(23)     | 1.379(9) |
| C(22)-H(22)     | 0.9500   |
| C(23)-C(24)     | 1.393(8) |
| C(23)-H(23)     | 0.9500   |
| C(24)-H(24)     | 0.9500   |
|                 |          |
| C(1)-N(1)-C(4)  | 113.7(4) |
| C(1)-N(1)-C(18) | 123.4(4) |
| C(4)-N(1)-C(18) | 121.9(3) |
| C(5)-N(2)-C(6)  | 126.5(4) |
| C(5)-N(2)-H(2)  | 113(3)   |
| C(6)-N(2)-H(2)  | 121(3)   |
| O(1)-C(1)-N(1)  | 124.9(4) |
| O(1)-C(1)-C(2)  | 126.6(4) |
| N(1)-C(1)-C(2)  | 108.4(4) |
| C(3)-C(2)-C(1)  | 107.0(4) |

|                   |          |
|-------------------|----------|
| C(3)-C(2)-H(2A)   | 110.3    |
| C(1)-C(2)-H(2A)   | 110.3    |
| C(3)-C(2)-H(2B)   | 110.3    |
| C(1)-C(2)-H(2B)   | 110.3    |
| H(2A)-C(2)-H(2B)  | 108.6    |
| C(2)-C(3)-C(4)    | 106.2(4) |
| C(2)-C(3)-H(3A)   | 110.5    |
| C(4)-C(3)-H(3A)   | 110.5    |
| C(2)-C(3)-H(3B)   | 110.5    |
| C(4)-C(3)-H(3B)   | 110.5    |
| H(3A)-C(3)-H(3B)  | 108.7    |
| N(1)-C(4)-C(5)    | 113.1(4) |
| N(1)-C(4)-C(3)    | 102.5(4) |
| C(5)-C(4)-C(3)    | 108.7(4) |
| N(1)-C(4)-H(4)    | 110.7    |
| C(5)-C(4)-H(4)    | 110.7    |
| C(3)-C(4)-H(4)    | 110.7    |
| O(2)-C(5)-N(2)    | 124.4(5) |
| O(2)-C(5)-C(4)    | 123.0(4) |
| N(2)-C(5)-C(4)    | 112.5(4) |
| C(7)-C(6)-C(11)   | 119.7(4) |
| C(7)-C(6)-N(2)    | 121.7(4) |
| C(11)-C(6)-N(2)   | 118.6(4) |
| C(8)-C(7)-C(6)    | 120.5(5) |
| C(8)-C(7)-H(7)    | 119.7    |
| C(6)-C(7)-H(7)    | 119.7    |
| C(7)-C(8)-C(9)    | 120.6(5) |
| C(7)-C(8)-H(8)    | 119.7    |
| C(9)-C(8)-H(8)    | 119.7    |
| C(10)-C(9)-C(8)   | 118.8(5) |
| C(10)-C(9)-H(9)   | 120.6    |
| C(8)-C(9)-H(9)    | 120.6    |
| C(9)-C(10)-C(11)  | 121.8(5) |
| C(9)-C(10)-H(10)  | 119.1    |
| C(11)-C(10)-H(10) | 119.1    |
| C(10)-C(11)-C(6)  | 118.5(4) |
| C(10)-C(11)-C(12) | 117.1(4) |
| C(6)-C(11)-C(12)  | 124.4(4) |

|                     |          |
|---------------------|----------|
| C(17)-C(12)-C(13)   | 118.8(4) |
| C(17)-C(12)-C(11)   | 120.6(4) |
| C(13)-C(12)-C(11)   | 120.3(4) |
| C(14)-C(13)-C(12)   | 120.3(5) |
| C(14)-C(13)-H(13)   | 119.8    |
| C(12)-C(13)-H(13)   | 119.8    |
| C(15)-C(14)-C(13)   | 120.4(5) |
| C(15)-C(14)-H(14)   | 119.8    |
| C(13)-C(14)-H(14)   | 119.8    |
| C(14)-C(15)-C(16)   | 120.1(5) |
| C(14)-C(15)-H(15)   | 119.9    |
| C(16)-C(15)-H(15)   | 119.9    |
| C(15)-C(16)-C(17)   | 120.1(5) |
| C(15)-C(16)-H(16)   | 119.9    |
| C(17)-C(16)-H(16)   | 119.9    |
| C(16)-C(17)-C(12)   | 120.2(5) |
| C(16)-C(17)-H(17)   | 119.9    |
| C(12)-C(17)-H(17)   | 119.9    |
| N(1)-C(18)-C(19)    | 112.7(4) |
| N(1)-C(18)-H(18A)   | 109.1    |
| C(19)-C(18)-H(18A)  | 109.1    |
| N(1)-C(18)-H(18B)   | 109.1    |
| C(19)-C(18)-H(18B)  | 109.1    |
| H(18A)-C(18)-H(18B) | 107.8    |
| C(20)-C(19)-C(24)   | 118.0(5) |
| C(20)-C(19)-C(18)   | 120.6(4) |
| C(24)-C(19)-C(18)   | 121.4(5) |
| C(21)-C(20)-C(19)   | 121.7(5) |
| C(21)-C(20)-H(20)   | 119.1    |
| C(19)-C(20)-H(20)   | 119.1    |
| C(22)-C(21)-C(20)   | 119.9(6) |
| C(22)-C(21)-H(21)   | 120.0    |
| C(20)-C(21)-H(21)   | 120.0    |
| C(21)-C(22)-C(23)   | 120.1(7) |
| C(21)-C(22)-H(22)   | 119.9    |
| C(23)-C(22)-H(22)   | 119.9    |
| C(22)-C(23)-C(24)   | 120.4(6) |
| C(22)-C(23)-H(23)   | 119.8    |

|                   |          |
|-------------------|----------|
| C(24)-C(23)-H(23) | 119.8    |
| C(19)-C(24)-C(23) | 119.8(6) |
| C(19)-C(24)-H(24) | 120.1    |
| C(23)-C(24)-H(24) | 120.1    |

---

Symmetry transformations used to generate equivalent atoms:

Table 4. Anisotropic displacement parameters ( $\text{\AA}^2 \times 10^3$ ) for dd20119. The anisotropic displacement factor exponent takes the form:  $-2\pi^2 [ h^2 a^{*2} U^{11} + \dots + 2 h k a^* b^* U^{12} ]$

|       | $U^{11}$ | $U^{22}$ | $U^{33}$ | $U^{23}$ | $U^{13}$ | $U^{12}$ |
|-------|----------|----------|----------|----------|----------|----------|
| O(1)  | 57(2)    | 43(2)    | 52(2)    | -3(2)    | -20(2)   | -5(2)    |
| O(2)  | 84(3)    | 73(2)    | 30(2)    | -9(2)    | 14(2)    | -8(2)    |
| N(1)  | 44(3)    | 46(2)    | 49(2)    | -14(2)   | -17(2)   | 14(2)    |
| N(2)  | 38(2)    | 41(2)    | 23(2)    | -1(2)    | 2(2)     | -3(2)    |
| C(1)  | 42(3)    | 40(3)    | 36(2)    | 8(2)     | -6(2)    | -1(2)    |
| C(2)  | 44(3)    | 52(3)    | 62(3)    | 0(3)     | -11(3)   | 6(3)     |
| C(3)  | 65(4)    | 79(4)    | 106(5)   | -41(4)   | -47(4)   | 35(3)    |
| C(4)  | 43(3)    | 52(3)    | 44(3)    | -17(2)   | -11(2)   | 9(2)     |
| C(5)  | 51(3)    | 47(3)    | 28(2)    | -3(2)    | -5(2)    | 7(2)     |
| C(6)  | 38(3)    | 34(2)    | 35(2)    | -1(2)    | 7(2)     | 3(2)     |
| C(7)  | 61(4)    | 42(3)    | 48(3)    | 9(2)     | 13(3)    | 5(3)     |
| C(8)  | 69(4)    | 40(3)    | 83(4)    | 14(3)    | 25(3)    | -8(3)    |
| C(9)  | 64(4)    | 42(3)    | 103(5)   | -3(3)    | 6(4)     | -15(3)   |
| C(10) | 48(3)    | 42(3)    | 67(3)    | -11(3)   | 6(3)     | -11(3)   |
| C(11) | 32(3)    | 34(2)    | 46(3)    | -5(2)    | 2(2)     | 1(2)     |
| C(12) | 32(2)    | 51(3)    | 32(2)    | -7(2)    | -3(2)    | -7(2)    |
| C(13) | 48(3)    | 68(3)    | 39(3)    | -14(3)   | 0(2)     | 1(3)     |
| C(14) | 61(4)    | 105(5)   | 32(3)    | -11(3)   | 5(3)     | -3(3)    |
| C(15) | 63(4)    | 100(5)   | 32(3)    | 12(3)    | 3(3)     | -18(3)   |
| C(16) | 58(4)    | 69(3)    | 40(3)    | 10(3)    | -7(3)    | -13(3)   |
| C(17) | 47(3)    | 49(3)    | 35(2)    | -1(2)    | 0(2)     | -8(2)    |
| C(18) | 50(3)    | 53(3)    | 46(3)    | -12(2)   | -14(3)   | 15(2)    |
| C(19) | 46(3)    | 36(2)    | 53(3)    | -9(2)    | -4(2)    | 8(2)     |
| C(20) | 40(3)    | 61(3)    | 47(3)    | 2(3)     | -4(2)    | 11(2)    |
| C(21) | 66(4)    | 86(4)    | 52(4)    | 5(3)     | 4(3)     | 30(4)    |
| C(22) | 106(6)   | 60(4)    | 79(5)    | 14(4)    | 25(5)    | 26(4)    |

|       |       |       |        |        |       |       |
|-------|-------|-------|--------|--------|-------|-------|
| C(23) | 98(6) | 40(3) | 118(6) | 2(4)   | 46(5) | -8(4) |
| C(24) | 58(4) | 48(3) | 96(5)  | -19(3) | 2(3)  | -8(3) |

Table 5. Hydrogen coordinates ( $\times 10^4$ ) and isotropic displacement parameters ( $\text{\AA}^2 \times 10^{-3}$ ) for dd20119.

|        | x        | y        | z        | U(eq)  |
|--------|----------|----------|----------|--------|
| H(2A)  | -730     | 5582     | 929      | 63     |
| H(2B)  | -1603    | 5225     | 2052     | 63     |
| H(3A)  | -505     | 5863     | 3403     | 100    |
| H(3B)  | 503      | 6136     | 2300     | 100    |
| H(4)   | 992      | 5046     | 4069     | 56     |
| H(7)   | 4103     | 6766     | 2778     | 60     |
| H(8)   | 5699     | 7616     | 3250     | 77     |
| H(9)   | 6359     | 7818     | 5365     | 83     |
| H(10)  | 5426     | 7143     | 6989     | 63     |
| H(13)  | 2851     | 6891     | 7952     | 62     |
| H(14)  | 2402     | 6260     | 9803     | 79     |
| H(15)  | 2954     | 5086     | 9922     | 78     |
| H(16)  | 4041     | 4543     | 8221     | 67     |
| H(17)  | 4523     | 5169     | 6357     | 52     |
| H(18A) | 3075     | 4251     | 2130     | 59     |
| H(18B) | 1916     | 3728     | 1644     | 59     |
| H(20)  | 4015     | 4060     | 4148     | 59     |
| H(21)  | 4059     | 3525     | 6135     | 82     |
| H(22)  | 2254     | 2852     | 6793     | 98     |
| H(23)  | 411      | 2676     | 5439     | 102    |
| H(24)  | 290      | 3264     | 3477     | 81     |
| H(2)   | 2200(50) | 5800(20) | 4980(40) | 49(14) |

Table 6. Torsion angles [ $^\circ$ ] for dd20119.

|                      |           |
|----------------------|-----------|
| C(4)-N(1)-C(1)-O(1)  | -170.9(4) |
| C(18)-N(1)-C(1)-O(1) | -2.3(7)   |
| C(4)-N(1)-C(1)-C(2)  | 10.8(5)   |
| C(18)-N(1)-C(1)-C(2) | 179.4(4)  |



|                         |           |
|-------------------------|-----------|
| O(1)-C(1)-C(2)-C(3)     | -179.7(5) |
| N(1)-C(1)-C(2)-C(3)     | -1.4(6)   |
| C(1)-C(2)-C(3)-C(4)     | -7.5(6)   |
| C(1)-N(1)-C(4)-C(5)     | -131.9(4) |
| C(18)-N(1)-C(4)-C(5)    | 59.3(6)   |
| C(1)-N(1)-C(4)-C(3)     | -14.9(5)  |
| C(18)-N(1)-C(4)-C(3)    | 176.3(5)  |
| C(2)-C(3)-C(4)-N(1)     | 12.9(6)   |
| C(2)-C(3)-C(4)-C(5)     | 132.9(5)  |
| C(6)-N(2)-C(5)-O(2)     | 9.1(7)    |
| C(6)-N(2)-C(5)-C(4)     | -167.9(4) |
| N(1)-C(4)-C(5)-O(2)     | 28.5(6)   |
| C(3)-C(4)-C(5)-O(2)     | -84.7(6)  |
| N(1)-C(4)-C(5)-N(2)     | -154.4(4) |
| C(3)-C(4)-C(5)-N(2)     | 92.4(5)   |
| C(5)-N(2)-C(6)-C(7)     | 23.5(6)   |
| C(5)-N(2)-C(6)-C(11)    | -160.0(4) |
| C(11)-C(6)-C(7)-C(8)    | 0.0(7)    |
| N(2)-C(6)-C(7)-C(8)     | 176.5(4)  |
| C(6)-C(7)-C(8)-C(9)     | -1.2(8)   |
| C(7)-C(8)-C(9)-C(10)    | 0.7(9)    |
| C(8)-C(9)-C(10)-C(11)   | 1.0(8)    |
| C(9)-C(10)-C(11)-C(6)   | -2.2(7)   |
| C(9)-C(10)-C(11)-C(12)  | 177.0(4)  |
| C(7)-C(6)-C(11)-C(10)   | 1.6(6)    |
| N(2)-C(6)-C(11)-C(10)   | -174.9(4) |
| C(7)-C(6)-C(11)-C(12)   | -177.5(4) |
| N(2)-C(6)-C(11)-C(12)   | 5.9(6)    |
| C(10)-C(11)-C(12)-C(17) | -113.9(5) |
| C(6)-C(11)-C(12)-C(17)  | 65.3(6)   |
| C(10)-C(11)-C(12)-C(13) | 59.1(6)   |
| C(6)-C(11)-C(12)-C(13)  | -121.8(5) |
| C(17)-C(12)-C(13)-C(14) | 1.7(7)    |
| C(11)-C(12)-C(13)-C(14) | -171.3(5) |
| C(12)-C(13)-C(14)-C(15) | -1.6(8)   |
| C(13)-C(14)-C(15)-C(16) | 1.1(8)    |
| C(14)-C(15)-C(16)-C(17) | -0.7(8)   |
| C(15)-C(16)-C(17)-C(12) | 0.9(7)    |

|                         |           |
|-------------------------|-----------|
| C(13)-C(12)-C(17)-C(16) | -1.4(6)   |
| C(11)-C(12)-C(17)-C(16) | 171.7(4)  |
| C(1)-N(1)-C(18)-C(19)   | -112.9(5) |
| C(4)-N(1)-C(18)-C(19)   | 54.8(6)   |
| N(1)-C(18)-C(19)-C(20)  | -108.9(5) |
| N(1)-C(18)-C(19)-C(24)  | 69.8(5)   |
| C(24)-C(19)-C(20)-C(21) | 0.5(7)    |
| C(18)-C(19)-C(20)-C(21) | 179.3(4)  |
| C(19)-C(20)-C(21)-C(22) | 0.3(8)    |
| C(20)-C(21)-C(22)-C(23) | 0.8(9)    |
| C(21)-C(22)-C(23)-C(24) | -2.7(9)   |
| C(20)-C(19)-C(24)-C(23) | -2.4(7)   |
| C(18)-C(19)-C(24)-C(23) | 178.8(4)  |
| C(22)-C(23)-C(24)-C(19) | 3.5(8)    |

---

Symmetry transformations used to generate equivalent atoms:

Table 7. Hydrogen bonds for dd20119 [Å and °].

| D-H...A             | d(D-H)  | d(H...A) | d(D...A) | <(DHA) |
|---------------------|---------|----------|----------|--------|
| N(2)-H(2)...O(1)#1  | 0.92(5) | 2.11(5)  | 2.945(5) | 151(4) |
| C(7)-H(7)...O(2)    | 0.95    | 2.33     | 2.885(6) | 116.5  |
| C(4)-H(4)...O(1)#1  | 1.00    | 2.45     | 3.110(6) | 122.7  |
| C(3)-H(3A)...O(1)#1 | 0.99    | 2.62     | 3.259(7) | 122.6  |
| C(3)-H(3A)...O(1)#1 | 0.99    | 2.62     | 3.259(7) | 122.6  |
| C(4)-H(4)...O(1)#1  | 1.00    | 2.45     | 3.110(6) | 122.7  |
| C(7)-H(7)...O(2)    | 0.95    | 2.33     | 2.885(6) | 116.5  |
| N(2)-H(2)...O(1)#1  | 0.92(5) | 2.11(5)  | 2.945(5) | 151(4) |

---

Symmetry transformations used to generate equivalent atoms:

#1 -x,-y+1,z+1/2

ORTEP drawing of the X-ray crystallographic structure of **6t**

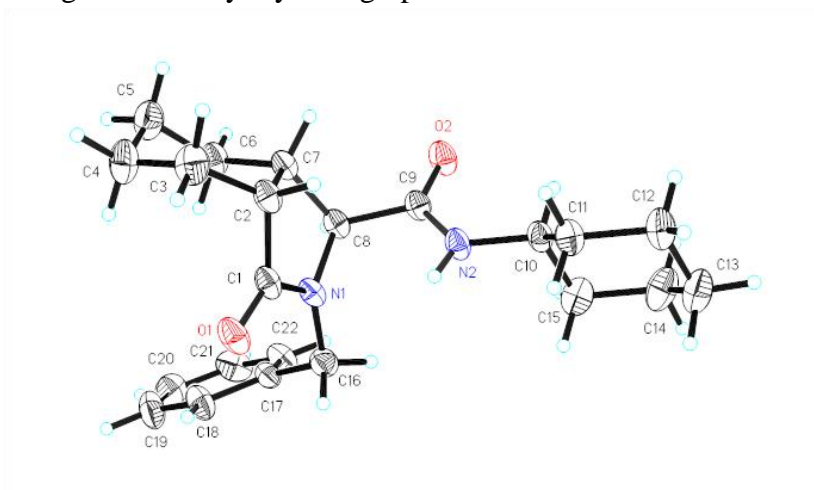

The single crystal of compound **6t** was prepared from its solution in petroleum ether/ethylacetate (1:1) by slow evaporation of the solvent.

CCDC 2089257. For detailed crystallographic data, please refer to the Cambridge Crystallographic Data Centre at <http://ccdc.cam.ac.uk>.

Table 1. Crystal data and structure refinement for mo\_ddz20072\_0m.

|                                 |                                                               |                 |
|---------------------------------|---------------------------------------------------------------|-----------------|
| Identification code             | mo_ddz20072_0m                                                |                 |
| Empirical formula               | C <sub>22</sub> H <sub>30</sub> N <sub>2</sub> O <sub>2</sub> |                 |
| Formula weight                  | 354.48                                                        |                 |
| Temperature                     | 293(2) K                                                      |                 |
| Wavelength                      | 0.71073 Å                                                     |                 |
| Crystal system                  | Triclinic                                                     |                 |
| Space group                     | P -1                                                          |                 |
| Unit cell dimensions            | a = 9.9031(14) Å                                              | α = 72.827(4)°. |
|                                 | b = 9.9209(15) Å                                              | β = 89.188(4)°. |
|                                 | c = 10.8025(14) Å                                             | γ = 78.782(5)°. |
| Volume                          | 993.6(2) Å <sup>3</sup>                                       |                 |
| Z                               | 2                                                             |                 |
| Density (calculated)            | 1.185 Mg/m <sup>3</sup>                                       |                 |
| Absorption coefficient          | 0.076 mm <sup>-1</sup>                                        |                 |
| F(000)                          | 384                                                           |                 |
| Crystal size                    | 0.180 x 0.150 x 0.110 mm <sup>3</sup>                         |                 |
| Theta range for data collection | 2.717 to 25.500°.                                             |                 |
| Index ranges                    | -11 ≤ h ≤ 11, -12 ≤ k ≤ 12, -13 ≤ l ≤ 13                      |                 |
| Reflections collected           | 22231                                                         |                 |
| Independent reflections         | 3683 [R(int) = 0.0909]                                        |                 |
| Completeness to theta = 25.242° | 99.8 %                                                        |                 |
| Absorption correction           | Semi-empirical from equivalents                               |                 |
| Max. and min. transmission      | 0.7456 and 0.2216                                             |                 |

|                                   |                                             |
|-----------------------------------|---------------------------------------------|
| Refinement method                 | Full-matrix least-squares on F <sup>2</sup> |
| Data / restraints / parameters    | 3683 / 0 / 236                              |
| Goodness-of-fit on F <sup>2</sup> | 1.029                                       |
| Final R indices [I>2sigma(I)]     | R1 = 0.0574, wR2 = 0.1469                   |
| R indices (all data)              | R1 = 0.0787, wR2 = 0.1651                   |
| Extinction coefficient            | 0.075(10)                                   |
| Largest diff. peak and hole       | 0.257 and -0.212 e.Å <sup>-3</sup>          |

Table 2. Atomic coordinates (x 10<sup>4</sup>) and equivalent isotropic displacement parameters (Å<sup>2</sup>x 10<sup>3</sup>) for mo\_ddz20072\_0m. U(eq) is defined as one third of the trace of the orthogonalized U<sup>ij</sup> tensor.

|       | x        | y        | z       | U(eq) |
|-------|----------|----------|---------|-------|
| O(1)  | 3819(1)  | 6280(2)  | 4881(1) | 57(1) |
| O(2)  | 6267(1)  | 5810(2)  | 232(1)  | 58(1) |
| N(1)  | 4018(1)  | 5866(2)  | 2904(1) | 41(1) |
| N(2)  | 6509(2)  | 4408(2)  | 2325(1) | 46(1) |
| C(1)  | 4266(2)  | 6526(2)  | 3786(2) | 43(1) |
| C(2)  | 5189(2)  | 7571(2)  | 3192(2) | 45(1) |
| C(3)  | 5052(2)  | 8852(3)  | 3719(2) | 64(1) |
| C(4)  | 3736(3)  | 9965(3)  | 3214(2) | 73(1) |
| C(5)  | 3600(3)  | 10402(2) | 1745(2) | 70(1) |
| C(6)  | 3555(2)  | 9099(2)  | 1295(2) | 54(1) |
| C(7)  | 4842(2)  | 7908(2)  | 1738(2) | 43(1) |
| C(8)  | 4577(2)  | 6458(2)  | 1648(2) | 41(1) |
| C(9)  | 5870(2)  | 5508(2)  | 1342(2) | 42(1) |
| C(10) | 7694(2)  | 3347(2)  | 2169(2) | 45(1) |
| C(11) | 8774(2)  | 2968(2)  | 3265(2) | 51(1) |
| C(12) | 10000(2) | 1861(2)  | 3080(2) | 65(1) |
| C(13) | 9560(3)  | 530(3)   | 2961(3) | 77(1) |
| C(14) | 8464(3)  | 906(3)   | 1882(3) | 79(1) |
| C(15) | 7243(2)  | 2011(2)  | 2072(2) | 64(1) |
| C(16) | 3146(2)  | 4805(2)  | 3117(2) | 50(1) |
| C(17) | 1665(2)  | 5498(2)  | 2691(2) | 42(1) |
| C(18) | 806(2)   | 6110(2)  | 3484(2) | 59(1) |
| C(19) | -530(2)  | 6805(3)  | 3070(3) | 72(1) |
| C(20) | -1010(2) | 6899(3)  | 1864(3) | 73(1) |
| C(21) | -179(2)  | 6284(3)  | 1070(2) | 70(1) |
| C(22) | 1155(2)  | 5584(2)  | 1486(2) | 56(1) |

---

Table 3. Bond lengths [Å] and angles [°] for mo\_ddz20072\_0m.

---

|              |          |
|--------------|----------|
| O(1)-C(1)    | 1.229(2) |
| O(2)-C(9)    | 1.226(2) |
| N(1)-C(1)    | 1.354(2) |
| N(1)-C(16)   | 1.454(2) |
| N(1)-C(8)    | 1.458(2) |
| N(2)-C(9)    | 1.336(2) |
| N(2)-C(10)   | 1.460(2) |
| N(2)-H(2)    | 0.8600   |
| C(1)-C(2)    | 1.511(3) |
| C(2)-C(3)    | 1.522(3) |
| C(2)-C(7)    | 1.535(2) |
| C(2)-H(2A)   | 0.9800   |
| C(3)-C(4)    | 1.523(3) |
| C(3)-H(3A)   | 0.9700   |
| C(3)-H(3B)   | 0.9700   |
| C(4)-C(5)    | 1.517(3) |
| C(4)-H(4A)   | 0.9700   |
| C(4)-H(4B)   | 0.9700   |
| C(5)-C(6)    | 1.517(3) |
| C(5)-H(5A)   | 0.9700   |
| C(5)-H(5B)   | 0.9700   |
| C(6)-C(7)    | 1.532(2) |
| C(6)-H(6A)   | 0.9700   |
| C(6)-H(6B)   | 0.9700   |
| C(7)-C(8)    | 1.542(3) |
| C(7)-H(7)    | 0.9800   |
| C(8)-C(9)    | 1.530(2) |
| C(8)-H(8)    | 0.9800   |
| C(10)-C(15)  | 1.511(3) |
| C(10)-C(11)  | 1.517(3) |
| C(10)-H(10)  | 0.9800   |
| C(11)-C(12)  | 1.525(3) |
| C(11)-H(11A) | 0.9700   |
| C(11)-H(11B) | 0.9700   |
| C(12)-C(13)  | 1.509(3) |

|                 |            |
|-----------------|------------|
| C(12)-H(12A)    | 0.9700     |
| C(12)-H(12B)    | 0.9700     |
| C(13)-C(14)     | 1.516(3)   |
| C(13)-H(13A)    | 0.9700     |
| C(13)-H(13B)    | 0.9700     |
| C(14)-C(15)     | 1.522(3)   |
| C(14)-H(14A)    | 0.9700     |
| C(14)-H(14B)    | 0.9700     |
| C(15)-H(15A)    | 0.9700     |
| C(15)-H(15B)    | 0.9700     |
| C(16)-C(17)     | 1.509(2)   |
| C(16)-H(16A)    | 0.9700     |
| C(16)-H(16B)    | 0.9700     |
| C(17)-C(22)     | 1.376(3)   |
| C(17)-C(18)     | 1.383(3)   |
| C(18)-C(19)     | 1.380(3)   |
| C(18)-H(18)     | 0.9300     |
| C(19)-C(20)     | 1.364(3)   |
| C(19)-H(19)     | 0.9300     |
| C(20)-C(21)     | 1.371(3)   |
| C(20)-H(20)     | 0.9300     |
| C(21)-C(22)     | 1.380(3)   |
| C(21)-H(21)     | 0.9300     |
| C(22)-H(22)     | 0.9300     |
|                 |            |
| C(1)-N(1)-C(16) | 124.11(15) |
| C(1)-N(1)-C(8)  | 112.92(16) |
| C(16)-N(1)-C(8) | 122.57(15) |
| C(9)-N(2)-C(10) | 123.41(14) |
| C(9)-N(2)-H(2)  | 118.3      |
| C(10)-N(2)-H(2) | 118.3      |
| O(1)-C(1)-N(1)  | 124.76(19) |
| O(1)-C(1)-C(2)  | 127.14(17) |
| N(1)-C(1)-C(2)  | 108.09(15) |
| C(1)-C(2)-C(3)  | 114.98(16) |
| C(1)-C(2)-C(7)  | 101.67(14) |
| C(3)-C(2)-C(7)  | 116.71(17) |
| C(1)-C(2)-H(2A) | 107.7      |

|                  |            |
|------------------|------------|
| C(3)-C(2)-H(2A)  | 107.7      |
| C(7)-C(2)-H(2A)  | 107.7      |
| C(2)-C(3)-C(4)   | 112.51(17) |
| C(2)-C(3)-H(3A)  | 109.1      |
| C(4)-C(3)-H(3A)  | 109.1      |
| C(2)-C(3)-H(3B)  | 109.1      |
| C(4)-C(3)-H(3B)  | 109.1      |
| H(3A)-C(3)-H(3B) | 107.8      |
| C(5)-C(4)-C(3)   | 110.92(18) |
| C(5)-C(4)-H(4A)  | 109.5      |
| C(3)-C(4)-H(4A)  | 109.5      |
| C(5)-C(4)-H(4B)  | 109.5      |
| C(3)-C(4)-H(4B)  | 109.5      |
| H(4A)-C(4)-H(4B) | 108.0      |
| C(4)-C(5)-C(6)   | 110.09(19) |
| C(4)-C(5)-H(5A)  | 109.6      |
| C(6)-C(5)-H(5A)  | 109.6      |
| C(4)-C(5)-H(5B)  | 109.6      |
| C(6)-C(5)-H(5B)  | 109.6      |
| H(5A)-C(5)-H(5B) | 108.2      |
| C(5)-C(6)-C(7)   | 112.95(17) |
| C(5)-C(6)-H(6A)  | 109.0      |
| C(7)-C(6)-H(6A)  | 109.0      |
| C(5)-C(6)-H(6B)  | 109.0      |
| C(7)-C(6)-H(6B)  | 109.0      |
| H(6A)-C(6)-H(6B) | 107.8      |
| C(6)-C(7)-C(2)   | 111.36(14) |
| C(6)-C(7)-C(8)   | 111.09(15) |
| C(2)-C(7)-C(8)   | 102.29(14) |
| C(6)-C(7)-H(7)   | 110.6      |
| C(2)-C(7)-H(7)   | 110.6      |
| C(8)-C(7)-H(7)   | 110.6      |
| N(1)-C(8)-C(9)   | 114.99(14) |
| N(1)-C(8)-C(7)   | 102.32(13) |
| C(9)-C(8)-C(7)   | 112.66(15) |
| N(1)-C(8)-H(8)   | 108.9      |
| C(9)-C(8)-H(8)   | 108.9      |
| C(7)-C(8)-H(8)   | 108.9      |

|                     |            |
|---------------------|------------|
| O(2)-C(9)-N(2)      | 124.26(16) |
| O(2)-C(9)-C(8)      | 118.76(15) |
| N(2)-C(9)-C(8)      | 116.97(15) |
| N(2)-C(10)-C(15)    | 110.58(16) |
| N(2)-C(10)-C(11)    | 111.56(14) |
| C(15)-C(10)-C(11)   | 110.63(16) |
| N(2)-C(10)-H(10)    | 108.0      |
| C(15)-C(10)-H(10)   | 108.0      |
| C(11)-C(10)-H(10)   | 108.0      |
| C(10)-C(11)-C(12)   | 110.58(16) |
| C(10)-C(11)-H(11A)  | 109.5      |
| C(12)-C(11)-H(11A)  | 109.5      |
| C(10)-C(11)-H(11B)  | 109.5      |
| C(12)-C(11)-H(11B)  | 109.5      |
| H(11A)-C(11)-H(11B) | 108.1      |
| C(13)-C(12)-C(11)   | 111.63(19) |
| C(13)-C(12)-H(12A)  | 109.3      |
| C(11)-C(12)-H(12A)  | 109.3      |
| C(13)-C(12)-H(12B)  | 109.3      |
| C(11)-C(12)-H(12B)  | 109.3      |
| H(12A)-C(12)-H(12B) | 108.0      |
| C(12)-C(13)-C(14)   | 111.17(19) |
| C(12)-C(13)-H(13A)  | 109.4      |
| C(14)-C(13)-H(13A)  | 109.4      |
| C(12)-C(13)-H(13B)  | 109.4      |
| C(14)-C(13)-H(13B)  | 109.4      |
| H(13A)-C(13)-H(13B) | 108.0      |
| C(13)-C(14)-C(15)   | 110.97(18) |
| C(13)-C(14)-H(14A)  | 109.4      |
| C(15)-C(14)-H(14A)  | 109.4      |
| C(13)-C(14)-H(14B)  | 109.4      |
| C(15)-C(14)-H(14B)  | 109.4      |
| H(14A)-C(14)-H(14B) | 108.0      |
| C(10)-C(15)-C(14)   | 111.19(19) |
| C(10)-C(15)-H(15A)  | 109.4      |
| C(14)-C(15)-H(15A)  | 109.4      |
| C(10)-C(15)-H(15B)  | 109.4      |
| C(14)-C(15)-H(15B)  | 109.4      |



|                     |            |
|---------------------|------------|
| H(15A)-C(15)-H(15B) | 108.0      |
| N(1)-C(16)-C(17)    | 111.75(15) |
| N(1)-C(16)-H(16A)   | 109.3      |
| C(17)-C(16)-H(16A)  | 109.3      |
| N(1)-C(16)-H(16B)   | 109.3      |
| C(17)-C(16)-H(16B)  | 109.3      |
| H(16A)-C(16)-H(16B) | 107.9      |
| C(22)-C(17)-C(18)   | 118.59(18) |
| C(22)-C(17)-C(16)   | 120.75(16) |
| C(18)-C(17)-C(16)   | 120.61(17) |
| C(19)-C(18)-C(17)   | 120.6(2)   |
| C(19)-C(18)-H(18)   | 119.7      |
| C(17)-C(18)-H(18)   | 119.7      |
| C(20)-C(19)-C(18)   | 119.9(2)   |
| C(20)-C(19)-H(19)   | 120.1      |
| C(18)-C(19)-H(19)   | 120.1      |
| C(19)-C(20)-C(21)   | 120.3(2)   |
| C(19)-C(20)-H(20)   | 119.9      |
| C(21)-C(20)-H(20)   | 119.9      |
| C(20)-C(21)-C(22)   | 119.8(2)   |
| C(20)-C(21)-H(21)   | 120.1      |
| C(22)-C(21)-H(21)   | 120.1      |
| C(17)-C(22)-C(21)   | 120.8(2)   |
| C(17)-C(22)-H(22)   | 119.6      |
| C(21)-C(22)-H(22)   | 119.6      |

---

Symmetry transformations used to generate equivalent atoms:

Table 4. Anisotropic displacement parameters ( $\text{\AA}^2 \times 10^3$ ) for mo\_ddz20072\_0m. The anisotropic displacement factor exponent takes the form:  $-2\pi^2 [ h^2 a^{*2}U^{11} + \dots + 2 h k a^* b^* U^{12} ]$

---

|      | U <sup>11</sup> | U <sup>22</sup> | U <sup>33</sup> | U <sup>23</sup> | U <sup>13</sup> | U <sup>12</sup> |
|------|-----------------|-----------------|-----------------|-----------------|-----------------|-----------------|
| O(1) | 52(1)           | 79(1)           | 32(1)           | -14(1)          | 6(1)            | 4(1)            |
| O(2) | 60(1)           | 71(1)           | 32(1)           | -13(1)          | 9(1)            | 5(1)            |
| N(1) | 34(1)           | 56(1)           | 33(1)           | -13(1)          | 4(1)            | -5(1)           |
| N(2) | 44(1)           | 55(1)           | 32(1)           | -12(1)          | 6(1)            | 4(1)            |
| C(1) | 33(1)           | 58(1)           | 31(1)           | -12(1)          | -2(1)           | 6(1)            |
| C(2) | 34(1)           | 60(1)           | 41(1)           | -19(1)          | -2(1)           | -2(1)           |

---

|       |        |       |        |        |        |        |
|-------|--------|-------|--------|--------|--------|--------|
| C(3)  | 68(1)  | 74(2) | 60(1)  | -33(1) | -3(1)  | -12(1) |
| C(4)  | 84(2)  | 71(2) | 69(2)  | -40(1) | 2(1)   | 4(1)   |
| C(5)  | 77(2)  | 58(1) | 68(2)  | -20(1) | 1(1)   | 7(1)   |
| C(6)  | 51(1)  | 59(1) | 44(1)  | -13(1) | -2(1)  | 7(1)   |
| C(7)  | 36(1)  | 53(1) | 38(1)  | -13(1) | 5(1)   | -3(1)  |
| C(8)  | 35(1)  | 55(1) | 29(1)  | -12(1) | -1(1)  | -2(1)  |
| C(9)  | 42(1)  | 53(1) | 32(1)  | -18(1) | 2(1)   | -4(1)  |
| C(10) | 46(1)  | 49(1) | 35(1)  | -14(1) | 7(1)   | 1(1)   |
| C(11) | 47(1)  | 58(1) | 51(1)  | -24(1) | 0(1)   | -2(1)  |
| C(12) | 51(1)  | 67(1) | 71(2)  | -24(1) | -4(1)  | 9(1)   |
| C(13) | 80(2)  | 58(1) | 81(2)  | -21(1) | -11(1) | 16(1)  |
| C(14) | 100(2) | 57(1) | 82(2)  | -35(1) | -14(2) | 5(1)   |
| C(15) | 70(1)  | 59(1) | 63(1)  | -24(1) | -14(1) | -4(1)  |
| C(16) | 42(1)  | 54(1) | 51(1)  | -13(1) | 5(1)   | -7(1)  |
| C(17) | 38(1)  | 48(1) | 44(1)  | -16(1) | 8(1)   | -11(1) |
| C(18) | 47(1)  | 82(2) | 62(1)  | -42(1) | 10(1)  | -16(1) |
| C(19) | 47(1)  | 81(2) | 106(2) | -57(2) | 18(1)  | -10(1) |
| C(20) | 42(1)  | 68(2) | 104(2) | -20(1) | -6(1)  | -4(1)  |
| C(21) | 56(1)  | 94(2) | 58(1)  | -13(1) | -8(1)  | -21(1) |
| C(22) | 48(1)  | 79(2) | 47(1)  | -24(1) | 10(1)  | -16(1) |

Table 5. Hydrogen coordinates ( $\times 10^4$ ) and isotropic displacement parameters ( $\text{\AA}^2 \times 10^{-3}$ ) for mo\_ddz20072\_0m.

|       | x    | y     | z    | U(eq) |
|-------|------|-------|------|-------|
| H(2)  | 6206 | 4320  | 3089 | 55    |
| H(2A) | 6144 | 7042  | 3364 | 54    |
| H(3A) | 5840 | 9306  | 3477 | 77    |
| H(3B) | 5061 | 8513  | 4659 | 77    |
| H(4A) | 2946 | 9567  | 3576 | 88    |
| H(4B) | 3747 | 10808 | 3492 | 88    |
| H(5A) | 4376 | 10824 | 1380 | 84    |
| H(5B) | 2763 | 11121 | 1442 | 84    |
| H(6A) | 3460 | 9399  | 356  | 65    |
| H(6B) | 2749 | 8715  | 1630 | 65    |
| H(7)  | 5627 | 8173  | 1227 | 52    |

|        |       |      |      |    |
|--------|-------|------|------|----|
| H(8)   | 3863  | 6646 | 966  | 49 |
| H(10)  | 8114  | 3770 | 1355 | 54 |
| H(11A) | 8371  | 2583 | 4086 | 61 |
| H(11B) | 9084  | 3831 | 3286 | 61 |
| H(12A) | 10458 | 2285 | 2305 | 78 |
| H(12B) | 10654 | 1594 | 3814 | 78 |
| H(13A) | 9201  | 40   | 3775 | 92 |
| H(13B) | 10353 | -121 | 2786 | 92 |
| H(14A) | 8153  | 42   | 1867 | 95 |
| H(14B) | 8856  | 1291 | 1054 | 95 |
| H(15A) | 6579  | 2270 | 1347 | 76 |
| H(15B) | 6797  | 1591 | 2857 | 76 |
| H(16A) | 3197  | 4271 | 4032 | 60 |
| H(16B) | 3484  | 4128 | 2639 | 60 |
| H(18)  | 1132  | 6053 | 4305 | 70 |
| H(19)  | -1102 | 7208 | 3613 | 87 |
| H(20)  | -1904 | 7382 | 1579 | 88 |
| H(21)  | -513  | 6338 | 252  | 85 |
| H(22)  | 1715  | 5167 | 945  | 67 |

Table 6. Torsion angles [°] for mo\_ddz20072\_0m.

|                      |             |
|----------------------|-------------|
| C(16)-N(1)-C(1)-O(1) | 2.2(3)      |
| C(8)-N(1)-C(1)-O(1)  | 174.95(15)  |
| C(16)-N(1)-C(1)-C(2) | -178.76(14) |
| C(8)-N(1)-C(1)-C(2)  | -5.96(18)   |
| O(1)-C(1)-C(2)-C(3)  | -27.9(2)    |
| N(1)-C(1)-C(2)-C(3)  | 152.99(16)  |
| O(1)-C(1)-C(2)-C(7)  | -155.00(16) |
| N(1)-C(1)-C(2)-C(7)  | 25.94(17)   |
| C(1)-C(2)-C(3)-C(4)  | -74.8(2)    |
| C(7)-C(2)-C(3)-C(4)  | 44.2(3)     |
| C(2)-C(3)-C(4)-C(5)  | -52.4(3)    |
| C(3)-C(4)-C(5)-C(6)  | 60.1(3)     |
| C(4)-C(5)-C(6)-C(7)  | -59.2(3)    |
| C(5)-C(6)-C(7)-C(2)  | 48.9(2)     |
| C(5)-C(6)-C(7)-C(8)  | 162.16(17)  |
| C(1)-C(2)-C(7)-C(6)  | 84.15(18)   |

|                         |             |
|-------------------------|-------------|
| C(3)-C(2)-C(7)-C(6)     | -41.8(2)    |
| C(1)-C(2)-C(7)-C(8)     | -34.57(15)  |
| C(3)-C(2)-C(7)-C(8)     | -160.49(16) |
| C(1)-N(1)-C(8)-C(9)     | 105.85(17)  |
| C(16)-N(1)-C(8)-C(9)    | -81.22(19)  |
| C(1)-N(1)-C(8)-C(7)     | -16.62(17)  |
| C(16)-N(1)-C(8)-C(7)    | 156.31(14)  |
| C(6)-C(7)-C(8)-N(1)     | -87.49(16)  |
| C(2)-C(7)-C(8)-N(1)     | 31.42(15)   |
| C(6)-C(7)-C(8)-C(9)     | 148.47(15)  |
| C(2)-C(7)-C(8)-C(9)     | -92.62(16)  |
| C(10)-N(2)-C(9)-O(2)    | -5.8(3)     |
| C(10)-N(2)-C(9)-C(8)    | 175.47(16)  |
| N(1)-C(8)-C(9)-O(2)     | 168.02(17)  |
| C(7)-C(8)-C(9)-O(2)     | -75.3(2)    |
| N(1)-C(8)-C(9)-N(2)     | -13.2(2)    |
| C(7)-C(8)-C(9)-N(2)     | 103.51(19)  |
| C(9)-N(2)-C(10)-C(15)   | -97.5(2)    |
| C(9)-N(2)-C(10)-C(11)   | 138.97(19)  |
| N(2)-C(10)-C(11)-C(12)  | 180.00(17)  |
| C(15)-C(10)-C(11)-C(12) | 56.5(2)     |
| C(10)-C(11)-C(12)-C(13) | -55.9(3)    |
| C(11)-C(12)-C(13)-C(14) | 55.2(3)     |
| C(12)-C(13)-C(14)-C(15) | -55.0(3)    |
| N(2)-C(10)-C(15)-C(14)  | 178.87(17)  |
| C(11)-C(10)-C(15)-C(14) | -57.0(2)    |
| C(13)-C(14)-C(15)-C(10) | 56.2(3)     |
| C(1)-N(1)-C(16)-C(17)   | 89.8(2)     |
| C(8)-N(1)-C(16)-C(17)   | -82.31(19)  |
| N(1)-C(16)-C(17)-C(22)  | 96.5(2)     |
| N(1)-C(16)-C(17)-C(18)  | -80.9(2)    |
| C(22)-C(17)-C(18)-C(19) | -0.6(3)     |
| C(16)-C(17)-C(18)-C(19) | 176.9(2)    |
| C(17)-C(18)-C(19)-C(20) | -0.4(4)     |
| C(18)-C(19)-C(20)-C(21) | 1.2(4)      |
| C(19)-C(20)-C(21)-C(22) | -0.9(4)     |
| C(18)-C(17)-C(22)-C(21) | 0.8(3)      |
| C(16)-C(17)-C(22)-C(21) | -176.6(2)   |

C(20)-C(21)-C(22)-C(17) -0.1(4)

---

Symmetry transformations used to generate equivalent atoms:

Table 7. Hydrogen bonds for mo\_ddz20072\_0m [Å and °].

---

| D-H...A               | d(D-H) | d(H...A) | d(D...A)   | <(DHA) |
|-----------------------|--------|----------|------------|--------|
| C(11)-H(11A)...O(1)#1 | 0.97   | 2.64     | 3.340(2)   | 129.7  |
| N(2)-H(2)...O(1)#1    | 0.86   | 2.10     | 2.9202(19) | 159.9  |

---

Symmetry transformations used to generate equivalent atoms:

#1 -x+1,-y+1,-z+1

ORTEP drawing of the X-ray crystallographic structure of **8a**

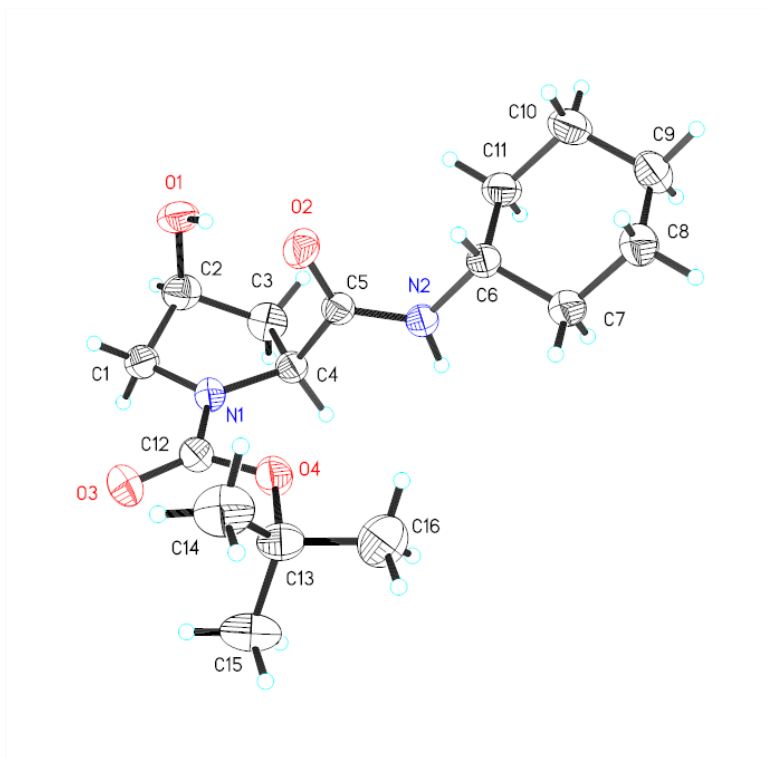

The single crystal of compound **8a** was prepared from its solution in petroleum ether/ethylacetate (1:1) by slow evaporation of the solvent.

CCDC 2089256. For detailed crystallographic data, please refer to the Cambridge Crystallographic Data Centre at <http://ccdc.cam.ac.uk>.

Table 1. Crystal data and structure refinement for mo\_ddz20132\_0m.

|                        |                                                               |          |
|------------------------|---------------------------------------------------------------|----------|
| Identification code    | mo_ddz20132_0m                                                |          |
| Empirical formula      | C <sub>16</sub> H <sub>28</sub> N <sub>2</sub> O <sub>4</sub> |          |
| Formula weight         | 312.40                                                        |          |
| Temperature            | 293(2) K                                                      |          |
| Wavelength             | 0.71073 Å                                                     |          |
| Crystal system         | Orthorhombic                                                  |          |
| Space group            | P 21 21 21                                                    |          |
| Unit cell dimensions   | a = 9.6865(7) Å                                               | α = 90°. |
|                        | b = 10.3400(8) Å                                              | β = 90°. |
|                        | c = 17.7546(11) Å                                             | γ = 90°. |
| Volume                 | 1778.3(2) Å <sup>3</sup>                                      |          |
| Z                      | 4                                                             |          |
| Density (calculated)   | 1.167 Mg/m <sup>3</sup>                                       |          |
| Absorption coefficient | 0.083 mm <sup>-1</sup>                                        |          |
| F(000)                 | 680                                                           |          |
| Crystal size           | 0.190 x 0.150 x 0.130 mm <sup>3</sup>                         |          |

|                                   |                                             |
|-----------------------------------|---------------------------------------------|
| Theta range for data collection   | 2.294 to 25.989°.                           |
| Index ranges                      | -11<=h<=10, -12<=k<=12, -21<=l<=19          |
| Reflections collected             | 8722                                        |
| Independent reflections           | 3456 [R(int) = 0.0266]                      |
| Completeness to theta = 25.242°   | 99.4 %                                      |
| Absorption correction             | Semi-empirical from equivalents             |
| Max. and min. transmission        | 0.7456 and 0.6306                           |
| Refinement method                 | Full-matrix least-squares on F <sup>2</sup> |
| Data / restraints / parameters    | 3456 / 0 / 204                              |
| Goodness-of-fit on F <sup>2</sup> | 1.039                                       |
| Final R indices [I>2sigma(I)]     | R1 = 0.0389, wR2 = 0.0833                   |
| R indices (all data)              | R1 = 0.0546, wR2 = 0.0935                   |
| Absolute structure parameter      | 0.0(6)                                      |
| Extinction coefficient            | 0.043(7)                                    |
| Largest diff. peak and hole       | 0.087 and -0.097 e.Å <sup>-3</sup>          |

Table 2. Atomic coordinates (x 10<sup>4</sup>) and equivalent isotropic displacement parameters (Å<sup>2</sup>x 10<sup>3</sup>) for mo\_ddz20132\_0m. U(eq) is defined as one third of the trace of the orthogonalized U<sup>ij</sup> tensor.

|       | x       | y       | z       | U(eq) |
|-------|---------|---------|---------|-------|
| O(1)  | 4807(2) | -212(2) | 1447(1) | 74(1) |
| O(2)  | 6627(2) | 558(2)  | 2526(1) | 67(1) |
| O(3)  | 7742(2) | 3127(2) | 552(1)  | 73(1) |
| O(4)  | 7830(2) | 3553(2) | 1811(1) | 63(1) |
| N(1)  | 6094(2) | 2430(2) | 1354(1) | 52(1) |
| N(2)  | 6243(2) | 2157(2) | 3363(1) | 52(1) |
| C(1)  | 5266(3) | 1781(3) | 780(1)  | 61(1) |
| C(2)  | 4253(3) | 1010(3) | 1239(2) | 66(1) |
| C(3)  | 4014(3) | 1882(3) | 1917(2) | 66(1) |
| C(4)  | 5436(2) | 2460(2) | 2093(1) | 48(1) |
| C(5)  | 6184(2) | 1648(2) | 2677(1) | 49(1) |
| C(6)  | 6706(3) | 1450(2) | 4026(1) | 51(1) |
| C(7)  | 7255(3) | 2383(3) | 4606(1) | 66(1) |
| C(8)  | 7705(3) | 1678(3) | 5314(2) | 75(1) |
| C(9)  | 6569(4) | 858(3)  | 5636(2) | 77(1) |
| C(10) | 6003(3) | -65(3)  | 5060(2) | 76(1) |
| C(11) | 5559(3) | 632(3)  | 4348(2) | 64(1) |
| C(12) | 7275(3) | 3048(2) | 1181(1) | 55(1) |

|       |          |         |         |       |
|-------|----------|---------|---------|-------|
| C(13) | 9173(3)  | 4211(3) | 1797(2) | 65(1) |
| C(14) | 10284(3) | 3309(3) | 1510(2) | 98(1) |
| C(15) | 9076(4)  | 5417(3) | 1330(2) | 98(1) |
| C(16) | 9387(4)  | 4531(4) | 2617(2) | 98(1) |

Table 3. Bond lengths [Å] and angles [°] for mo\_ddz20132\_0m.

|            |          |
|------------|----------|
| O(1)-C(2)  | 1.421(3) |
| O(1)-H(1)  | 0.8200   |
| O(2)-C(5)  | 1.235(3) |
| O(3)-C(12) | 1.208(3) |
| O(4)-C(12) | 1.347(3) |
| O(4)-C(13) | 1.468(3) |
| N(1)-C(12) | 1.346(3) |
| N(1)-C(4)  | 1.459(3) |
| N(1)-C(1)  | 1.461(3) |
| N(2)-C(5)  | 1.328(3) |
| N(2)-C(6)  | 1.456(3) |
| N(2)-H(2)  | 0.8600   |
| C(1)-C(2)  | 1.505(4) |
| C(1)-H(1A) | 0.9700   |
| C(1)-H(1B) | 0.9700   |
| C(2)-C(3)  | 1.522(4) |
| C(2)-H(2A) | 0.9800   |
| C(3)-C(4)  | 1.534(4) |
| C(3)-H(3A) | 0.9700   |
| C(3)-H(3B) | 0.9700   |
| C(4)-C(5)  | 1.518(3) |
| C(4)-H(4)  | 0.9800   |
| C(6)-C(7)  | 1.508(3) |
| C(6)-C(11) | 1.509(3) |
| C(6)-H(6)  | 0.9800   |
| C(7)-C(8)  | 1.517(3) |
| C(7)-H(7A) | 0.9700   |
| C(7)-H(7B) | 0.9700   |
| C(8)-C(9)  | 1.502(4) |
| C(8)-H(8A) | 0.9700   |
| C(8)-H(8B) | 0.9700   |



|                  |            |
|------------------|------------|
| C(9)-C(10)       | 1.502(4)   |
| C(9)-H(9A)       | 0.9700     |
| C(9)-H(9B)       | 0.9700     |
| C(10)-C(11)      | 1.517(3)   |
| C(10)-H(10A)     | 0.9700     |
| C(10)-H(10B)     | 0.9700     |
| C(11)-H(11A)     | 0.9700     |
| C(11)-H(11B)     | 0.9700     |
| C(13)-C(15)      | 1.502(4)   |
| C(13)-C(16)      | 1.508(4)   |
| C(13)-C(14)      | 1.513(4)   |
| C(14)-H(14A)     | 0.9600     |
| C(14)-H(14B)     | 0.9600     |
| C(14)-H(14C)     | 0.9600     |
| C(15)-H(15A)     | 0.9600     |
| C(15)-H(15B)     | 0.9600     |
| C(15)-H(15C)     | 0.9600     |
| C(16)-H(16A)     | 0.9600     |
| C(16)-H(16B)     | 0.9600     |
| C(16)-H(16C)     | 0.9600     |
|                  |            |
| C(2)-O(1)-H(1)   | 109.5      |
| C(12)-O(4)-C(13) | 121.3(2)   |
| C(12)-N(1)-C(4)  | 124.5(2)   |
| C(12)-N(1)-C(1)  | 121.7(2)   |
| C(4)-N(1)-C(1)   | 113.5(2)   |
| C(5)-N(2)-C(6)   | 123.75(19) |
| C(5)-N(2)-H(2)   | 118.1      |
| C(6)-N(2)-H(2)   | 118.1      |
| N(1)-C(1)-C(2)   | 102.88(19) |
| N(1)-C(1)-H(1A)  | 111.2      |
| C(2)-C(1)-H(1A)  | 111.2      |
| N(1)-C(1)-H(1B)  | 111.2      |
| C(2)-C(1)-H(1B)  | 111.2      |
| H(1A)-C(1)-H(1B) | 109.1      |
| O(1)-C(2)-C(1)   | 111.4(2)   |
| O(1)-C(2)-C(3)   | 112.3(2)   |
| C(1)-C(2)-C(3)   | 102.3(2)   |

|                  |            |
|------------------|------------|
| O(1)-C(2)-H(2A)  | 110.2      |
| C(1)-C(2)-H(2A)  | 110.2      |
| C(3)-C(2)-H(2A)  | 110.2      |
| C(2)-C(3)-C(4)   | 104.8(2)   |
| C(2)-C(3)-H(3A)  | 110.8      |
| C(4)-C(3)-H(3A)  | 110.8      |
| C(2)-C(3)-H(3B)  | 110.8      |
| C(4)-C(3)-H(3B)  | 110.8      |
| H(3A)-C(3)-H(3B) | 108.9      |
| N(1)-C(4)-C(5)   | 113.19(19) |
| N(1)-C(4)-C(3)   | 101.58(19) |
| C(5)-C(4)-C(3)   | 110.6(2)   |
| N(1)-C(4)-H(4)   | 110.4      |
| C(5)-C(4)-H(4)   | 110.4      |
| C(3)-C(4)-H(4)   | 110.4      |
| O(2)-C(5)-N(2)   | 123.0(2)   |
| O(2)-C(5)-C(4)   | 121.5(2)   |
| N(2)-C(5)-C(4)   | 115.3(2)   |
| N(2)-C(6)-C(7)   | 109.90(19) |
| N(2)-C(6)-C(11)  | 111.16(19) |
| C(7)-C(6)-C(11)  | 111.1(2)   |
| N(2)-C(6)-H(6)   | 108.2      |
| C(7)-C(6)-H(6)   | 108.2      |
| C(11)-C(6)-H(6)  | 108.2      |
| C(6)-C(7)-C(8)   | 111.1(2)   |
| C(6)-C(7)-H(7A)  | 109.4      |
| C(8)-C(7)-H(7A)  | 109.4      |
| C(6)-C(7)-H(7B)  | 109.4      |
| C(8)-C(7)-H(7B)  | 109.4      |
| H(7A)-C(7)-H(7B) | 108.0      |
| C(9)-C(8)-C(7)   | 112.1(3)   |
| C(9)-C(8)-H(8A)  | 109.2      |
| C(7)-C(8)-H(8A)  | 109.2      |
| C(9)-C(8)-H(8B)  | 109.2      |
| C(7)-C(8)-H(8B)  | 109.2      |
| H(8A)-C(8)-H(8B) | 107.9      |
| C(8)-C(9)-C(10)  | 111.5(2)   |
| C(8)-C(9)-H(9A)  | 109.3      |

|                     |          |
|---------------------|----------|
| C(10)-C(9)-H(9A)    | 109.3    |
| C(8)-C(9)-H(9B)     | 109.3    |
| C(10)-C(9)-H(9B)    | 109.3    |
| H(9A)-C(9)-H(9B)    | 108.0    |
| C(9)-C(10)-C(11)    | 111.7(2) |
| C(9)-C(10)-H(10A)   | 109.3    |
| C(11)-C(10)-H(10A)  | 109.3    |
| C(9)-C(10)-H(10B)   | 109.3    |
| C(11)-C(10)-H(10B)  | 109.3    |
| H(10A)-C(10)-H(10B) | 107.9    |
| C(6)-C(11)-C(10)    | 111.9(2) |
| C(6)-C(11)-H(11A)   | 109.2    |
| C(10)-C(11)-H(11A)  | 109.2    |
| C(6)-C(11)-H(11B)   | 109.2    |
| C(10)-C(11)-H(11B)  | 109.2    |
| H(11A)-C(11)-H(11B) | 107.9    |
| O(3)-C(12)-N(1)     | 124.2(2) |
| O(3)-C(12)-O(4)     | 126.3(2) |
| N(1)-C(12)-O(4)     | 109.5(2) |
| O(4)-C(13)-C(15)    | 109.8(2) |
| O(4)-C(13)-C(16)    | 102.0(2) |
| C(15)-C(13)-C(16)   | 111.1(3) |
| O(4)-C(13)-C(14)    | 110.5(2) |
| C(15)-C(13)-C(14)   | 111.7(3) |
| C(16)-C(13)-C(14)   | 111.3(3) |
| C(13)-C(14)-H(14A)  | 109.5    |
| C(13)-C(14)-H(14B)  | 109.5    |
| H(14A)-C(14)-H(14B) | 109.5    |
| C(13)-C(14)-H(14C)  | 109.5    |
| H(14A)-C(14)-H(14C) | 109.5    |
| H(14B)-C(14)-H(14C) | 109.5    |
| C(13)-C(15)-H(15A)  | 109.5    |
| C(13)-C(15)-H(15B)  | 109.5    |
| H(15A)-C(15)-H(15B) | 109.5    |
| C(13)-C(15)-H(15C)  | 109.5    |
| H(15A)-C(15)-H(15C) | 109.5    |
| H(15B)-C(15)-H(15C) | 109.5    |
| C(13)-C(16)-H(16A)  | 109.5    |

|                     |       |
|---------------------|-------|
| C(13)-C(16)-H(16B)  | 109.5 |
| H(16A)-C(16)-H(16B) | 109.5 |
| C(13)-C(16)-H(16C)  | 109.5 |
| H(16A)-C(16)-H(16C) | 109.5 |
| H(16B)-C(16)-H(16C) | 109.5 |

---

Symmetry transformations used to generate equivalent atoms:

Table 4. Anisotropic displacement parameters ( $\text{\AA}^2 \times 10^3$ ) for mo\_ddz20132\_0m. The anisotropic displacement factor exponent takes the form:  $-2\pi^2 [ h^2 a^{*2} U^{11} + \dots + 2 h k a^* b^* U^{12} ]$

|       | $U^{11}$ | $U^{22}$ | $U^{33}$ | $U^{23}$ | $U^{13}$ | $U^{12}$ |
|-------|----------|----------|----------|----------|----------|----------|
| O(1)  | 95(2)    | 48(1)    | 78(1)    | 4(1)     | -10(1)   | -16(1)   |
| O(2)  | 87(1)    | 55(1)    | 58(1)    | -7(1)    | -7(1)    | 23(1)    |
| O(3)  | 87(1)    | 79(1)    | 53(1)    | 2(1)     | 18(1)    | -9(1)    |
| O(4)  | 62(1)    | 74(1)    | 54(1)    | -1(1)    | 2(1)     | -18(1)   |
| N(1)  | 61(1)    | 53(1)    | 41(1)    | -2(1)    | 2(1)     | -6(1)    |
| N(2)  | 68(1)    | 41(1)    | 46(1)    | 0(1)     | 1(1)     | 8(1)     |
| C(1)  | 78(2)    | 52(2)    | 52(1)    | 2(1)     | -11(1)   | -3(1)    |
| C(2)  | 63(2)    | 63(2)    | 71(2)    | 3(1)     | -15(1)   | -8(1)    |
| C(3)  | 50(1)    | 73(2)    | 76(2)    | 2(2)     | 0(1)     | 3(1)     |
| C(4)  | 53(1)    | 45(1)    | 47(1)    | 2(1)     | 3(1)     | 5(1)     |
| C(5)  | 52(1)    | 44(1)    | 49(1)    | 1(1)     | 6(1)     | 3(1)     |
| C(6)  | 57(1)    | 46(1)    | 50(1)    | 0(1)     | 0(1)     | 7(1)     |
| C(7)  | 82(2)    | 58(2)    | 58(1)    | 4(1)     | -9(1)    | -14(2)   |
| C(8)  | 89(2)    | 74(2)    | 61(2)    | 4(1)     | -15(2)   | -9(2)    |
| C(9)  | 97(2)    | 80(2)    | 54(2)    | 12(1)    | 2(2)     | 4(2)     |
| C(10) | 87(2)    | 66(2)    | 76(2)    | 21(2)    | -3(2)    | -10(2)   |
| C(11) | 70(2)    | 54(2)    | 67(2)    | 7(1)     | -7(1)    | -7(1)    |
| C(12) | 64(2)    | 51(1)    | 49(1)    | 2(1)     | 4(1)     | 1(1)     |
| C(13) | 51(2)    | 59(2)    | 85(2)    | 6(1)     | -1(1)    | -8(1)    |
| C(14) | 71(2)    | 89(3)    | 133(3)   | 6(2)     | 2(2)     | 16(2)    |
| C(15) | 88(2)    | 67(2)    | 137(3)   | 28(2)    | 0(2)     | -10(2)   |
| C(16) | 86(2)    | 109(3)   | 99(2)    | -8(2)    | -22(2)   | -20(2)   |

---

Table 5. Hydrogen coordinates ( $\times 10^4$ ) and isotropic displacement parameters ( $\text{\AA}^2 \times 10^{-3}$ ) for mo\_ddz20132\_0m.

|        | x     | y    | z    | U(eq) |
|--------|-------|------|------|-------|
| H(1)   | 5481  | -104 | 1720 | 111   |
| H(2)   | 5992  | 2949 | 3419 | 62    |
| H(1A)  | 5832  | 1222 | 468  | 73    |
| H(1B)  | 4795  | 2403 | 461  | 73    |
| H(2A)  | 3390  | 893  | 959  | 79    |
| H(3A)  | 3671  | 1387 | 2342 | 80    |
| H(3B)  | 3354  | 2557 | 1798 | 80    |
| H(4)   | 5341  | 3354 | 2269 | 58    |
| H(6)   | 7460  | 875  | 3874 | 61    |
| H(7A)  | 6544  | 3007 | 4732 | 79    |
| H(7B)  | 8035  | 2850 | 4398 | 79    |
| H(8A)  | 8492  | 1133 | 5198 | 89    |
| H(8B)  | 7994  | 2305 | 5688 | 89    |
| H(9A)  | 5831  | 1413 | 5815 | 92    |
| H(9B)  | 6921  | 372  | 6062 | 92    |
| H(10A) | 5217  | -519 | 5271 | 91    |
| H(10B) | 6703  | -701 | 4936 | 91    |
| H(11A) | 5274  | 0    | 3975 | 76    |
| H(11B) | 4772  | 1179 | 4459 | 76    |
| H(14A) | 10244 | 2508 | 1783 | 147   |
| H(14B) | 11173 | 3700 | 1581 | 147   |
| H(14C) | 10140 | 3145 | 983  | 147   |
| H(15A) | 8988  | 5187 | 808  | 146   |
| H(15B) | 9895  | 5927 | 1399 | 146   |
| H(15C) | 8284  | 5909 | 1483 | 146   |
| H(16A) | 8633  | 5053 | 2793 | 147   |
| H(16B) | 10236 | 4999 | 2676 | 147   |
| H(16C) | 9427  | 3746 | 2905 | 147   |

Table 6. Torsion angles [°] for mo\_ddz20132\_0m.

---

|                        |           |
|------------------------|-----------|
| C(12)-N(1)-C(1)-C(2)   | 168.4(2)  |
| C(4)-N(1)-C(1)-C(2)    | -18.2(3)  |
| N(1)-C(1)-C(2)-O(1)    | -86.1(3)  |
| N(1)-C(1)-C(2)-C(3)    | 34.1(3)   |
| O(1)-C(2)-C(3)-C(4)    | 80.8(3)   |
| C(1)-C(2)-C(3)-C(4)    | -38.8(3)  |
| C(12)-N(1)-C(4)-C(5)   | -73.9(3)  |
| C(1)-N(1)-C(4)-C(5)    | 112.9(2)  |
| C(12)-N(1)-C(4)-C(3)   | 167.5(2)  |
| C(1)-N(1)-C(4)-C(3)    | -5.7(3)   |
| C(2)-C(3)-C(4)-N(1)    | 27.3(2)   |
| C(2)-C(3)-C(4)-C(5)    | -93.2(2)  |
| C(6)-N(2)-C(5)-O(2)    | -6.2(4)   |
| C(6)-N(2)-C(5)-C(4)    | 169.5(2)  |
| N(1)-C(4)-C(5)-O(2)    | -43.2(3)  |
| C(3)-C(4)-C(5)-O(2)    | 70.1(3)   |
| N(1)-C(4)-C(5)-N(2)    | 141.1(2)  |
| C(3)-C(4)-C(5)-N(2)    | -105.7(2) |
| C(5)-N(2)-C(6)-C(7)    | 154.5(2)  |
| C(5)-N(2)-C(6)-C(11)   | -82.1(3)  |
| N(2)-C(6)-C(7)-C(8)    | 178.2(2)  |
| C(11)-C(6)-C(7)-C(8)   | 54.8(3)   |
| C(6)-C(7)-C(8)-C(9)    | -55.1(3)  |
| C(7)-C(8)-C(9)-C(10)   | 54.4(3)   |
| C(8)-C(9)-C(10)-C(11)  | -53.6(3)  |
| N(2)-C(6)-C(11)-C(10)  | -177.4(2) |
| C(7)-C(6)-C(11)-C(10)  | -54.7(3)  |
| C(9)-C(10)-C(11)-C(6)  | 54.1(3)   |
| C(4)-N(1)-C(12)-O(3)   | -172.3(3) |
| C(1)-N(1)-C(12)-O(3)   | 0.4(4)    |
| C(4)-N(1)-C(12)-O(4)   | 7.5(3)    |
| C(1)-N(1)-C(12)-O(4)   | -179.8(2) |
| C(13)-O(4)-C(12)-O(3)  | -4.2(4)   |
| C(13)-O(4)-C(12)-N(1)  | 176.0(2)  |
| C(12)-O(4)-C(13)-C(15) | 65.1(3)   |
| C(12)-O(4)-C(13)-C(16) | -177.0(2) |

C(12)-O(4)-C(13)-C(14) -58.6(3)

---

Symmetry transformations used to generate equivalent atoms:

Table 7. Hydrogen bonds for mo\_ddz20132\_0m [Å and °].

---

| D-H...A             | d(D-H) | d(H...A) | d(D...A) | <(DHA) |
|---------------------|--------|----------|----------|--------|
| C(15)-H(15A)...O(3) | 0.96   | 2.49     | 3.031(4) | 115.5  |
| C(14)-H(14C)...O(3) | 0.96   | 2.45     | 2.999(4) | 116.4  |
| N(2)-H(2)...O(1)#1  | 0.86   | 2.07     | 2.924(3) | 174.4  |
| O(1)-H(1)...O(2)    | 0.82   | 1.94     | 2.723(3) | 160.1  |
| O(1)-H(1)...O(2)    | 0.82   | 1.94     | 2.723(3) | 160.1  |
| N(2)-H(2)...O(1)#1  | 0.86   | 2.07     | 2.924(3) | 174.4  |
| C(14)-H(14C)...O(3) | 0.96   | 2.45     | 2.999(4) | 116.4  |
| C(15)-H(15A)...O(3) | 0.96   | 2.49     | 3.031(4) | 115.5  |

---

Symmetry transformations used to generate equivalent atoms:

#1 -x+1,y+1/2,-z+1/2

ORTEP drawing of the X-ray crystallographic structure of **8d**

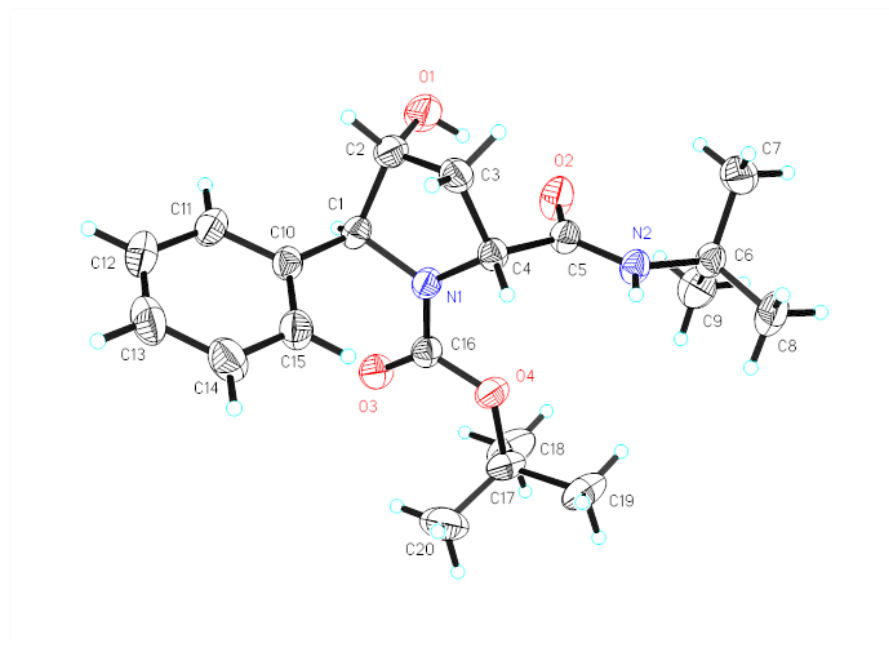

The single crystal of compound **8d** was prepared from its solution in petroleum ether/ethylacetate (1:1) by slow evaporation of the solvent.

CCDC 2089258. For detailed crystallographic data, please refer to the Cambridge Crystallographic Data Centre at <http://ccdc.cam.ac.uk>.

Table 1. Crystal data and structure refinement for ddz20133.

|                                 |                                                               |                 |
|---------------------------------|---------------------------------------------------------------|-----------------|
| Identification code             | ddz20133                                                      |                 |
| Empirical formula               | C <sub>20</sub> H <sub>30</sub> N <sub>2</sub> O <sub>4</sub> |                 |
| Formula weight                  | 362.46                                                        |                 |
| Temperature                     | 293(2) K                                                      |                 |
| Wavelength                      | 0.71073 Å                                                     |                 |
| Crystal system                  | Monoclinic                                                    |                 |
| Space group                     | P 21/c                                                        |                 |
| Unit cell dimensions            | a = 13.4680(13) Å                                             | α = 90°.        |
|                                 | b = 14.2172(13) Å                                             | β = 92.363(3)°. |
|                                 | c = 10.9007(10) Å                                             | γ = 90°.        |
| Volume                          | 2085.5(3) Å <sup>3</sup>                                      |                 |
| Z                               | 4                                                             |                 |
| Density (calculated)            | 1.154 Mg/m <sup>3</sup>                                       |                 |
| Absorption coefficient          | 0.080 mm <sup>-1</sup>                                        |                 |
| F(000)                          | 784                                                           |                 |
| Crystal size                    | 0.160 x 0.130 x 0.090 mm <sup>3</sup>                         |                 |
| Theta range for data collection | 2.758 to 25.499°.                                             |                 |
| Index ranges                    | -16 ≤ h ≤ 16, -17 ≤ k ≤ 17, -13 ≤ l ≤ 13                      |                 |
| Reflections collected           | 29338                                                         |                 |



|                                   |                                             |
|-----------------------------------|---------------------------------------------|
| Independent reflections           | 3881 [R(int) = 0.0666]                      |
| Completeness to theta = 25.242°   | 99.8 %                                      |
| Absorption correction             | Semi-empirical from equivalents             |
| Max. and min. transmission        | 0.7456 and 0.6955                           |
| Refinement method                 | Full-matrix least-squares on F <sup>2</sup> |
| Data / restraints / parameters    | 3881 / 0 / 243                              |
| Goodness-of-fit on F <sup>2</sup> | 1.085                                       |
| Final R indices [I > 2σ(I)]       | R1 = 0.0521, wR2 = 0.1082                   |
| R indices (all data)              | R1 = 0.0908, wR2 = 0.1293                   |
| Extinction coefficient            | 0.0173(19)                                  |
| Largest diff. peak and hole       | 0.154 and -0.143 e.Å <sup>-3</sup>          |

Table 2. Atomic coordinates ( $\times 10^4$ ) and equivalent isotropic displacement parameters ( $\text{\AA}^2 \times 10^3$ ) for ddz20133.  $U(\text{eq})$  is defined as one third of the trace of the orthogonalized  $U^{ij}$  tensor.

|       | x        | y       | z       | U(eq) |
|-------|----------|---------|---------|-------|
| O(1)  | 10076(1) | 2794(1) | 2912(2) | 78(1) |
| O(2)  | 8868(1)  | 1225(1) | 2967(1) | 73(1) |
| O(3)  | 6831(1)  | 3456(1) | 1607(1) | 62(1) |
| O(4)  | 6439(1)  | 2301(1) | 2951(1) | 57(1) |
| N(1)  | 7891(1)  | 3019(1) | 3177(1) | 49(1) |
| N(2)  | 7849(1)  | 745(1)  | 4446(2) | 51(1) |
| C(1)  | 8606(2)  | 3782(1) | 3007(2) | 50(1) |
| C(2)  | 9536(2)  | 3390(2) | 3679(2) | 59(1) |
| C(3)  | 9105(2)  | 2870(2) | 4756(2) | 56(1) |
| C(4)  | 8150(2)  | 2412(1) | 4231(2) | 46(1) |
| C(5)  | 8317(2)  | 1398(1) | 3817(2) | 50(1) |
| C(6)  | 7864(2)  | -284(1) | 4248(2) | 55(1) |
| C(7)  | 8896(2)  | -670(2) | 4546(3) | 82(1) |
| C(8)  | 7120(2)  | -684(2) | 5117(3) | 81(1) |
| C(9)  | 7555(2)  | -512(2) | 2931(2) | 82(1) |
| C(10) | 8262(2)  | 4713(1) | 3511(2) | 49(1) |
| C(11) | 8784(2)  | 5524(2) | 3270(2) | 65(1) |
| C(12) | 8494(2)  | 6380(2) | 3718(3) | 82(1) |
| C(13) | 7686(2)  | 6436(2) | 4425(3) | 84(1) |
| C(14) | 7152(2)  | 5644(2) | 4682(2) | 77(1) |
| C(15) | 7438(2)  | 4791(2) | 4216(2) | 64(1) |
| C(16) | 7035(2)  | 2966(2) | 2499(2) | 50(1) |

|       |         |         |         |        |
|-------|---------|---------|---------|--------|
| C(17) | 5463(2) | 2084(2) | 2358(2) | 64(1)  |
| C(18) | 5614(2) | 1694(2) | 1091(2) | 96(1)  |
| C(19) | 5073(2) | 1328(2) | 3186(3) | 90(1)  |
| C(20) | 4806(2) | 2939(2) | 2356(3) | 105(1) |

Table 3. Bond lengths [Å] and angles [°] for ddz20133.

|            |          |
|------------|----------|
| O(1)-C(2)  | 1.413(2) |
| O(1)-H(1)  | 0.8200   |
| O(2)-C(5)  | 1.235(2) |
| O(3)-C(16) | 1.218(2) |
| O(4)-C(16) | 1.347(2) |
| O(4)-C(17) | 1.473(3) |
| N(1)-C(16) | 1.346(3) |
| N(1)-C(1)  | 1.467(2) |
| N(1)-C(4)  | 1.468(2) |
| N(2)-C(5)  | 1.328(2) |
| N(2)-C(6)  | 1.479(3) |
| N(2)-H(2)  | 0.8600   |
| C(1)-C(10) | 1.512(3) |
| C(1)-C(2)  | 1.530(3) |
| C(1)-H(1A) | 0.9800   |
| C(2)-C(3)  | 1.523(3) |
| C(2)-H(2A) | 0.9800   |
| C(3)-C(4)  | 1.532(3) |
| C(3)-H(3A) | 0.9700   |
| C(3)-H(3B) | 0.9700   |
| C(4)-C(5)  | 1.529(3) |
| C(4)-H(4)  | 0.9800   |
| C(6)-C(9)  | 1.514(3) |
| C(6)-C(8)  | 1.518(3) |
| C(6)-C(7)  | 1.517(3) |
| C(7)-H(7A) | 0.9600   |
| C(7)-H(7B) | 0.9600   |
| C(7)-H(7C) | 0.9600   |
| C(8)-H(8A) | 0.9600   |
| C(8)-H(8B) | 0.9600   |
| C(8)-H(8C) | 0.9600   |

|                  |            |
|------------------|------------|
| C(9)-H(9A)       | 0.9600     |
| C(9)-H(9B)       | 0.9600     |
| C(9)-H(9C)       | 0.9600     |
| C(10)-C(11)      | 1.381(3)   |
| C(10)-C(15)      | 1.381(3)   |
| C(11)-C(12)      | 1.375(3)   |
| C(11)-H(11)      | 0.9300     |
| C(12)-C(13)      | 1.361(4)   |
| C(12)-H(12)      | 0.9300     |
| C(13)-C(14)      | 1.371(4)   |
| C(13)-H(13)      | 0.9300     |
| C(14)-C(15)      | 1.376(3)   |
| C(14)-H(14)      | 0.9300     |
| C(15)-H(15)      | 0.9300     |
| C(17)-C(20)      | 1.504(4)   |
| C(17)-C(18)      | 1.509(3)   |
| C(17)-C(19)      | 1.511(3)   |
| C(18)-H(18A)     | 0.9600     |
| C(18)-H(18B)     | 0.9600     |
| C(18)-H(18C)     | 0.9600     |
| C(19)-H(19A)     | 0.9600     |
| C(19)-H(19B)     | 0.9600     |
| C(19)-H(19C)     | 0.9600     |
| C(20)-H(20A)     | 0.9600     |
| C(20)-H(20B)     | 0.9600     |
| C(20)-H(20C)     | 0.9600     |
|                  |            |
| C(2)-O(1)-H(1)   | 109.5      |
| C(16)-O(4)-C(17) | 121.43(16) |
| C(16)-N(1)-C(1)  | 121.57(17) |
| C(16)-N(1)-C(4)  | 124.59(17) |
| C(1)-N(1)-C(4)   | 113.46(16) |
| C(5)-N(2)-C(6)   | 127.36(17) |
| C(5)-N(2)-H(2)   | 116.3      |
| C(6)-N(2)-H(2)   | 116.3      |
| N(1)-C(1)-C(10)  | 112.92(16) |
| N(1)-C(1)-C(2)   | 101.51(16) |
| C(10)-C(1)-C(2)  | 113.65(17) |

|                  |            |
|------------------|------------|
| N(1)-C(1)-H(1A)  | 109.5      |
| C(10)-C(1)-H(1A) | 109.5      |
| C(2)-C(1)-H(1A)  | 109.5      |
| O(1)-C(2)-C(3)   | 112.76(18) |
| O(1)-C(2)-C(1)   | 111.49(19) |
| C(3)-C(2)-C(1)   | 102.38(17) |
| O(1)-C(2)-H(2A)  | 110.0      |
| C(3)-C(2)-H(2A)  | 110.0      |
| C(1)-C(2)-H(2A)  | 110.0      |
| C(2)-C(3)-C(4)   | 105.04(17) |
| C(2)-C(3)-H(3A)  | 110.7      |
| C(4)-C(3)-H(3A)  | 110.7      |
| C(2)-C(3)-H(3B)  | 110.7      |
| C(4)-C(3)-H(3B)  | 110.7      |
| H(3A)-C(3)-H(3B) | 108.8      |
| N(1)-C(4)-C(5)   | 110.90(15) |
| N(1)-C(4)-C(3)   | 102.16(15) |
| C(5)-C(4)-C(3)   | 112.34(17) |
| N(1)-C(4)-H(4)   | 110.4      |
| C(5)-C(4)-H(4)   | 110.4      |
| C(3)-C(4)-H(4)   | 110.4      |
| O(2)-C(5)-N(2)   | 124.06(19) |
| O(2)-C(5)-C(4)   | 120.63(18) |
| N(2)-C(5)-C(4)   | 115.30(17) |
| N(2)-C(6)-C(9)   | 110.16(18) |
| N(2)-C(6)-C(8)   | 105.48(17) |
| C(9)-C(6)-C(8)   | 110.4(2)   |
| N(2)-C(6)-C(7)   | 110.19(18) |
| C(9)-C(6)-C(7)   | 109.8(2)   |
| C(8)-C(6)-C(7)   | 110.7(2)   |
| C(6)-C(7)-H(7A)  | 109.5      |
| C(6)-C(7)-H(7B)  | 109.5      |
| H(7A)-C(7)-H(7B) | 109.5      |
| C(6)-C(7)-H(7C)  | 109.5      |
| H(7A)-C(7)-H(7C) | 109.5      |
| H(7B)-C(7)-H(7C) | 109.5      |
| C(6)-C(8)-H(8A)  | 109.5      |
| C(6)-C(8)-H(8B)  | 109.5      |

|                    |            |
|--------------------|------------|
| H(8A)-C(8)-H(8B)   | 109.5      |
| C(6)-C(8)-H(8C)    | 109.5      |
| H(8A)-C(8)-H(8C)   | 109.5      |
| H(8B)-C(8)-H(8C)   | 109.5      |
| C(6)-C(9)-H(9A)    | 109.5      |
| C(6)-C(9)-H(9B)    | 109.5      |
| H(9A)-C(9)-H(9B)   | 109.5      |
| C(6)-C(9)-H(9C)    | 109.5      |
| H(9A)-C(9)-H(9C)   | 109.5      |
| H(9B)-C(9)-H(9C)   | 109.5      |
| C(11)-C(10)-C(15)  | 117.7(2)   |
| C(11)-C(10)-C(1)   | 119.76(19) |
| C(15)-C(10)-C(1)   | 122.51(18) |
| C(12)-C(11)-C(10)  | 121.2(2)   |
| C(12)-C(11)-H(11)  | 119.4      |
| C(10)-C(11)-H(11)  | 119.4      |
| C(13)-C(12)-C(11)  | 119.9(2)   |
| C(13)-C(12)-H(12)  | 120.1      |
| C(11)-C(12)-H(12)  | 120.1      |
| C(12)-C(13)-C(14)  | 120.5(2)   |
| C(12)-C(13)-H(13)  | 119.8      |
| C(14)-C(13)-H(13)  | 119.8      |
| C(13)-C(14)-C(15)  | 119.3(3)   |
| C(13)-C(14)-H(14)  | 120.3      |
| C(15)-C(14)-H(14)  | 120.3      |
| C(14)-C(15)-C(10)  | 121.4(2)   |
| C(14)-C(15)-H(15)  | 119.3      |
| C(10)-C(15)-H(15)  | 119.3      |
| O(3)-C(16)-N(1)    | 124.5(2)   |
| O(3)-C(16)-O(4)    | 125.1(2)   |
| N(1)-C(16)-O(4)    | 110.38(17) |
| O(4)-C(17)-C(20)   | 110.2(2)   |
| O(4)-C(17)-C(18)   | 109.05(18) |
| C(20)-C(17)-C(18)  | 113.4(2)   |
| O(4)-C(17)-C(19)   | 102.31(18) |
| C(20)-C(17)-C(19)  | 110.9(2)   |
| C(18)-C(17)-C(19)  | 110.4(2)   |
| C(17)-C(18)-H(18A) | 109.5      |

|                     |       |
|---------------------|-------|
| C(17)-C(18)-H(18B)  | 109.5 |
| H(18A)-C(18)-H(18B) | 109.5 |
| C(17)-C(18)-H(18C)  | 109.5 |
| H(18A)-C(18)-H(18C) | 109.5 |
| H(18B)-C(18)-H(18C) | 109.5 |
| C(17)-C(19)-H(19A)  | 109.5 |
| C(17)-C(19)-H(19B)  | 109.5 |
| H(19A)-C(19)-H(19B) | 109.5 |
| C(17)-C(19)-H(19C)  | 109.5 |
| H(19A)-C(19)-H(19C) | 109.5 |
| H(19B)-C(19)-H(19C) | 109.5 |
| C(17)-C(20)-H(20A)  | 109.5 |
| C(17)-C(20)-H(20B)  | 109.5 |
| H(20A)-C(20)-H(20B) | 109.5 |
| C(17)-C(20)-H(20C)  | 109.5 |
| H(20A)-C(20)-H(20C) | 109.5 |
| H(20B)-C(20)-H(20C) | 109.5 |

---

Symmetry transformations used to generate equivalent atoms:

Table 4. Anisotropic displacement parameters ( $\text{\AA}^2 \times 10^3$ ) for ddz20133. The anisotropic displacement factor exponent takes the form:  $-2\pi^2 [ h^2 a^{*2} U^{11} + \dots + 2 h k a^* b^* U^{12} ]$

|      | $U^{11}$ | $U^{22}$ | $U^{33}$ | $U^{23}$ | $U^{13}$ | $U^{12}$ |
|------|----------|----------|----------|----------|----------|----------|
| O(1) | 62(1)    | 66(1)    | 109(1)   | -7(1)    | 31(1)    | 1(1)     |
| O(2) | 93(1)    | 54(1)    | 75(1)    | -9(1)    | 42(1)    | -6(1)    |
| O(3) | 64(1)    | 72(1)    | 49(1)    | 14(1)    | 3(1)     | -1(1)    |
| O(4) | 47(1)    | 67(1)    | 56(1)    | 10(1)    | 0(1)     | -10(1)   |
| N(1) | 49(1)    | 47(1)    | 50(1)    | 5(1)     | 1(1)     | -6(1)    |
| N(2) | 58(1)    | 41(1)    | 54(1)    | -3(1)    | 14(1)    | -3(1)    |
| C(1) | 51(1)    | 48(1)    | 51(1)    | 3(1)     | 10(1)    | -9(1)    |
| C(2) | 49(1)    | 53(1)    | 75(2)    | -7(1)    | 7(1)     | -2(1)    |
| C(3) | 56(1)    | 50(1)    | 63(1)    | -3(1)    | -4(1)    | 4(1)     |
| C(4) | 51(1)    | 45(1)    | 44(1)    | 2(1)     | 7(1)     | 2(1)     |
| C(5) | 56(1)    | 46(1)    | 50(1)    | -2(1)    | 8(1)     | -1(1)    |
| C(6) | 62(2)    | 39(1)    | 65(1)    | -6(1)    | 6(1)     | -6(1)    |
| C(7) | 74(2)    | 55(2)    | 116(2)   | -8(1)    | -2(2)    | 7(1)     |

|       |        |        |        |        |       |        |
|-------|--------|--------|--------|--------|-------|--------|
| C(8)  | 94(2)  | 53(1)  | 98(2)  | 2(1)   | 25(2) | -19(1) |
| C(9)  | 96(2)  | 70(2)  | 80(2)  | -21(1) | -2(2) | -15(2) |
| C(10) | 54(1)  | 45(1)  | 48(1)  | 7(1)   | 1(1)  | -2(1)  |
| C(11) | 64(2)  | 55(2)  | 77(2)  | 1(1)   | 6(1)  | -14(1) |
| C(12) | 91(2)  | 49(2)  | 107(2) | 0(1)   | 5(2)  | -14(1) |
| C(13) | 106(2) | 49(2)  | 97(2)  | -7(1)  | -2(2) | 11(2)  |
| C(14) | 84(2)  | 64(2)  | 84(2)  | 4(1)   | 19(2) | 19(2)  |
| C(15) | 72(2)  | 51(1)  | 69(2)  | 6(1)   | 16(1) | 2(1)   |
| C(16) | 52(1)  | 51(1)  | 46(1)  | 1(1)   | 12(1) | -1(1)  |
| C(17) | 42(1)  | 88(2)  | 61(1)  | 2(1)   | 4(1)  | -8(1)  |
| C(18) | 84(2)  | 139(3) | 65(2)  | -20(2) | 7(2)  | -39(2) |
| C(19) | 63(2)  | 119(2) | 90(2)  | 9(2)   | 10(2) | -33(2) |
| C(20) | 63(2)  | 129(3) | 125(3) | 13(2)  | 9(2)  | 25(2)  |

Table 5. Hydrogen coordinates ( $\times 10^4$ ) and isotropic displacement parameters ( $\text{\AA}^2 \times 10^{-3}$ ) for ddz20133.

|       | x    | y     | z    | U(eq) |
|-------|------|-------|------|-------|
| H(1)  | 9768 | 2303  | 2795 | 118   |
| H(2)  | 7498 | 943   | 5034 | 61    |
| H(1A) | 8729 | 3849  | 2132 | 60    |
| H(2A) | 9961 | 3908  | 3981 | 71    |
| H(3A) | 8959 | 3304  | 5412 | 68    |
| H(3B) | 9566 | 2398  | 5076 | 68    |
| H(4)  | 7629 | 2436  | 4832 | 56    |
| H(7A) | 9359 | -396  | 4002 | 123   |
| H(7B) | 8891 | -1341 | 4443 | 123   |
| H(7C) | 9091 | -519  | 5379 | 123   |
| H(8A) | 7328 | -539  | 5948 | 122   |
| H(8B) | 7082 | -1354 | 5016 | 122   |
| H(8C) | 6478 | -412  | 4936 | 122   |
| H(9A) | 6898 | -275  | 2752 | 123   |
| H(9B) | 7560 | -1181 | 2816 | 123   |
| H(9C) | 8011 | -224  | 2390 | 123   |
| H(11) | 9342 | 5490  | 2796 | 78    |
| H(12) | 8849 | 6921  | 3539 | 99    |

|        |      |      |      |     |
|--------|------|------|------|-----|
| H(13)  | 7495 | 7015 | 4735 | 101 |
| H(14)  | 6601 | 5683 | 5167 | 92  |
| H(15)  | 7069 | 4256 | 4380 | 76  |
| H(18A) | 5877 | 2178 | 582  | 144 |
| H(18B) | 4990 | 1480 | 739  | 144 |
| H(18C) | 6073 | 1178 | 1147 | 144 |
| H(19A) | 5530 | 809  | 3224 | 136 |
| H(19B) | 4438 | 1114 | 2864 | 136 |
| H(19C) | 5003 | 1579 | 3995 | 136 |
| H(20A) | 4788 | 3188 | 3174 | 158 |
| H(20B) | 4146 | 2769 | 2072 | 158 |
| H(20C) | 5065 | 3407 | 1821 | 158 |

Table 6. Torsion angles [°] for ddz20133.

|                       |             |
|-----------------------|-------------|
| C(16)-N(1)-C(1)-C(10) | 73.5(2)     |
| C(4)-N(1)-C(1)-C(10)  | -99.72(19)  |
| C(16)-N(1)-C(1)-C(2)  | -164.46(18) |
| C(4)-N(1)-C(1)-C(2)   | 22.3(2)     |
| N(1)-C(1)-C(2)-O(1)   | 84.60(19)   |
| C(10)-C(1)-C(2)-O(1)  | -153.86(17) |
| N(1)-C(1)-C(2)-C(3)   | -36.20(19)  |
| C(10)-C(1)-C(2)-C(3)  | 85.3(2)     |
| O(1)-C(2)-C(3)-C(4)   | -81.4(2)    |
| C(1)-C(2)-C(3)-C(4)   | 38.5(2)     |
| C(16)-N(1)-C(4)-C(5)  | 68.3(2)     |
| C(1)-N(1)-C(4)-C(5)   | -118.73(18) |
| C(16)-N(1)-C(4)-C(3)  | -171.81(18) |
| C(1)-N(1)-C(4)-C(3)   | 1.2(2)      |
| C(2)-C(3)-C(4)-N(1)   | -24.7(2)    |
| C(2)-C(3)-C(4)-C(5)   | 94.21(19)   |
| C(6)-N(2)-C(5)-O(2)   | -1.8(3)     |
| C(6)-N(2)-C(5)-C(4)   | 179.44(18)  |
| N(1)-C(4)-C(5)-O(2)   | 49.6(3)     |
| C(3)-C(4)-C(5)-O(2)   | -64.0(3)    |
| N(1)-C(4)-C(5)-N(2)   | -131.55(19) |
| C(3)-C(4)-C(5)-N(2)   | 114.8(2)    |
| C(5)-N(2)-C(6)-C(9)   | -54.7(3)    |



|                         |             |
|-------------------------|-------------|
| C(5)-N(2)-C(6)-C(8)     | -173.8(2)   |
| C(5)-N(2)-C(6)-C(7)     | 66.6(3)     |
| N(1)-C(1)-C(10)-C(11)   | -170.94(19) |
| C(2)-C(1)-C(10)-C(11)   | 74.1(2)     |
| N(1)-C(1)-C(10)-C(15)   | 9.3(3)      |
| C(2)-C(1)-C(10)-C(15)   | -105.7(2)   |
| C(15)-C(10)-C(11)-C(12) | 0.1(3)      |
| C(1)-C(10)-C(11)-C(12)  | -179.7(2)   |
| C(10)-C(11)-C(12)-C(13) | 0.8(4)      |
| C(11)-C(12)-C(13)-C(14) | -0.7(4)     |
| C(12)-C(13)-C(14)-C(15) | -0.2(4)     |
| C(13)-C(14)-C(15)-C(10) | 1.1(4)      |
| C(11)-C(10)-C(15)-C(14) | -1.0(3)     |
| C(1)-C(10)-C(15)-C(14)  | 178.8(2)    |
| C(1)-N(1)-C(16)-O(3)    | 9.3(3)      |
| C(4)-N(1)-C(16)-O(3)    | -178.22(18) |
| C(1)-N(1)-C(16)-O(4)    | -170.23(16) |
| C(4)-N(1)-C(16)-O(4)    | 2.2(3)      |
| C(17)-O(4)-C(16)-O(3)   | 1.9(3)      |
| C(17)-O(4)-C(16)-N(1)   | -178.51(17) |
| C(16)-O(4)-C(17)-C(20)  | -61.0(3)    |
| C(16)-O(4)-C(17)-C(18)  | 64.1(3)     |
| C(16)-O(4)-C(17)-C(19)  | -178.99(19) |

---

Symmetry transformations used to generate equivalent atoms:

Table 7. Hydrogen bonds for ddz20133 [Å and °].

| D-H...A             | d(D-H) | d(H...A) | d(D...A) | <(DHA) |
|---------------------|--------|----------|----------|--------|
| C(20)-H(20C)...O(3) | 0.96   | 2.40     | 2.970(3) | 117.7  |
| C(18)-H(18A)...O(3) | 0.96   | 2.47     | 3.033(3) | 117.6  |
| C(9)-H(9C)...O(2)   | 0.96   | 2.43     | 3.036(3) | 120.7  |
| C(7)-H(7A)...O(2)   | 0.96   | 2.64     | 3.197(3) | 117.5  |
| C(4)-H(4)...O(3)#1  | 0.98   | 2.58     | 3.431(2) | 144.5  |
| N(2)-H(2)...O(3)#1  | 0.86   | 2.15     | 2.998(2) | 171.0  |
| O(1)-H(1)...O(2)    | 0.82   | 1.97     | 2.763(2) | 163.5  |

---

Symmetry transformations used to generate equivalent atoms: #1 x,-y+1/2,z+1/2

ORTEP drawing of the X-ray crystallographic structure of deprotected **9**

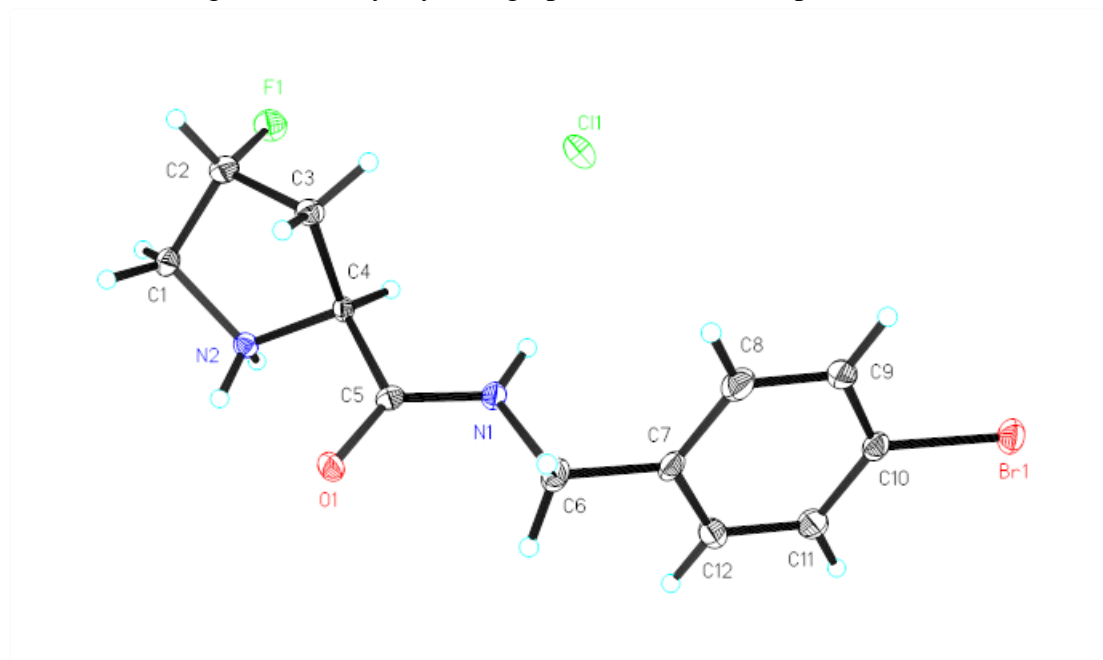

The compound **9** (20 mg) was dissolved in HCl/MeOH (6 M, 5 mL) and stirred at rt for 2h, then concentrated to give the deprotected **9** as its hydrochloride. The single crystal was prepared from its solution in methanol/acetonitrile (1:10) by slow evaporation of the solvent.

CCDC 2094462. For detailed crystallographic data, please refer to the Cambridge Crystallographic Data Centre at <http://ccdc.cam.ac.uk>.

Table 1. Crystal data and structure refinement for mo\_d8v21545\_0m.

|                                 |                                                                  |                 |
|---------------------------------|------------------------------------------------------------------|-----------------|
| Identification code             | mo_d8v21545_0m                                                   |                 |
| Empirical formula               | C <sub>15</sub> H <sub>22</sub> Cl <sub>2</sub> N <sub>2</sub> O |                 |
| Formula weight                  | 317.24                                                           |                 |
| Temperature                     | 213(2) K                                                         |                 |
| Wavelength                      | 0.71073 Å                                                        |                 |
| Crystal system                  | Monoclinic                                                       |                 |
| Space group                     | P 21/c                                                           |                 |
| Unit cell dimensions            | a = 6.0632(3) Å                                                  | α = 90°.        |
|                                 | b = 26.8654(12) Å                                                | β = 92.299(2)°. |
|                                 | c = 10.3001(5) Å                                                 | γ = 90°.        |
| Volume                          | 1676.44(14) Å <sup>3</sup>                                       |                 |
| Z                               | 4                                                                |                 |
| Density (calculated)            | 1.257 Mg/m <sup>3</sup>                                          |                 |
| Absorption coefficient          | 0.385 mm <sup>-1</sup>                                           |                 |
| F(000)                          | 672                                                              |                 |
| Crystal size                    | 0.140 x 0.100 x 0.060 mm <sup>3</sup>                            |                 |
| Theta range for data collection | 3.015 to 25.998°.                                                |                 |
| Index ranges                    | -6 ≤ h ≤ 7, -33 ≤ k ≤ 31, -12 ≤ l ≤ 12                           |                 |

|                                   |                                             |
|-----------------------------------|---------------------------------------------|
| Reflections collected             | 12631                                       |
| Independent reflections           | 3288 [R(int) = 0.0461]                      |
| Completeness to theta = 25.242°   | 99.8 %                                      |
| Absorption correction             | Semi-empirical from equivalents             |
| Max. and min. transmission        | 0.7456 and 0.6686                           |
| Refinement method                 | Full-matrix least-squares on F <sup>2</sup> |
| Data / restraints / parameters    | 3288 / 0 / 184                              |
| Goodness-of-fit on F <sup>2</sup> | 1.075                                       |
| Final R indices [I > 2sigma(I)]   | R1 = 0.0458, wR2 = 0.0894                   |
| R indices (all data)              | R1 = 0.0703, wR2 = 0.1028                   |
| Extinction coefficient            | n/a                                         |
| Largest diff. peak and hole       | 0.208 and -0.270 e.Å <sup>-3</sup>          |

Table 2. Atomic coordinates (x 10<sup>4</sup>) and equivalent isotropic displacement parameters (Å<sup>2</sup> × 10<sup>3</sup>) for mo\_d8v21545\_0m. U(eq) is defined as one third of the trace of the orthogonalized U<sup>ij</sup> tensor.

|       | x       | y       | z       | U(eq) |
|-------|---------|---------|---------|-------|
| Cl(1) | 2384(1) | 5292(1) | 3349(1) | 56(1) |
| O(1)  | 6731(3) | 1880(1) | 5455(2) | 41(1) |
| N(1)  | 4033(3) | 1646(1) | 3969(2) | 34(1) |
| N(2)  | 8377(3) | 2570(1) | 3858(2) | 29(1) |
| C(1)  | 5636(4) | 1943(1) | 4432(2) | 31(1) |
| C(2)  | 6056(4) | 2396(1) | 3597(2) | 28(1) |
| C(3)  | 4625(4) | 2849(1) | 3929(2) | 32(1) |
| C(4)  | 6251(4) | 3260(1) | 4390(2) | 29(1) |
| C(5)  | 8337(4) | 3120(1) | 3705(2) | 30(1) |
| C(6)  | 5391(4) | 3780(1) | 4162(2) | 29(1) |
| C(7)  | 3429(4) | 3923(1) | 4708(2) | 34(1) |
| C(8)  | 2513(4) | 4385(1) | 4479(2) | 40(1) |
| C(9)  | 3580(4) | 4714(1) | 3691(2) | 37(1) |
| C(10) | 5561(5) | 4593(1) | 3170(2) | 40(1) |
| C(11) | 6452(4) | 4126(1) | 3402(2) | 36(1) |
| C(12) | 3207(4) | 1189(1) | 4596(2) | 38(1) |
| C(13) | 2192(5) | 1319(1) | 5877(3) | 49(1) |
| C(14) | 1452(6) | 973(1)  | 3653(3) | 66(1) |
| C(15) | 5099(5) | 819(1)  | 4798(3) | 50(1) |
| Cl(2) | 957(1)  | 2160(1) | 1625(1) | 38(1) |

---

Table 3. Bond lengths [Å] and angles [°] for mo\_d8v21545\_0m.

---

|              |          |
|--------------|----------|
| Cl(1)-C(9)   | 1.745(3) |
| O(1)-C(1)    | 1.234(3) |
| N(1)-C(1)    | 1.332(3) |
| N(1)-C(12)   | 1.485(3) |
| N(1)-H(1)    | 0.8700   |
| N(2)-C(5)    | 1.484(3) |
| N(2)-C(2)    | 1.497(3) |
| N(2)-H(2A)   | 0.9800   |
| N(2)-H(2B)   | 0.9800   |
| C(1)-C(2)    | 1.518(3) |
| C(2)-C(3)    | 1.541(3) |
| C(2)-H(2)    | 0.9900   |
| C(3)-C(4)    | 1.541(3) |
| C(3)-H(3A)   | 0.9800   |
| C(3)-H(3B)   | 0.9800   |
| C(4)-C(6)    | 1.508(3) |
| C(4)-C(5)    | 1.520(3) |
| C(4)-H(4)    | 0.9900   |
| C(5)-H(5A)   | 0.9800   |
| C(5)-H(5B)   | 0.9800   |
| C(6)-C(7)    | 1.390(3) |
| C(6)-C(11)   | 1.389(3) |
| C(7)-C(8)    | 1.377(3) |
| C(7)-H(7)    | 0.9400   |
| C(8)-C(9)    | 1.378(4) |
| C(8)-H(8)    | 0.9400   |
| C(9)-C(10)   | 1.374(4) |
| C(10)-C(11)  | 1.382(4) |
| C(10)-H(10)  | 0.9400   |
| C(11)-H(11)  | 0.9400   |
| C(12)-C(13)  | 1.518(4) |
| C(12)-C(15)  | 1.525(4) |
| C(12)-C(14)  | 1.527(4) |
| C(13)-H(13A) | 0.9700   |
| C(13)-H(13B) | 0.9700   |

|                  |            |
|------------------|------------|
| C(13)-H(13C)     | 0.9700     |
| C(14)-H(14A)     | 0.9700     |
| C(14)-H(14B)     | 0.9700     |
| C(14)-H(14C)     | 0.9700     |
| C(15)-H(15A)     | 0.9700     |
| C(15)-H(15B)     | 0.9700     |
| C(15)-H(15C)     | 0.9700     |
|                  |            |
| C(1)-N(1)-C(12)  | 126.4(2)   |
| C(1)-N(1)-H(1)   | 116.8      |
| C(12)-N(1)-H(1)  | 116.8      |
| C(5)-N(2)-C(2)   | 106.23(17) |
| C(5)-N(2)-H(2A)  | 110.5      |
| C(2)-N(2)-H(2A)  | 110.5      |
| C(5)-N(2)-H(2B)  | 110.5      |
| C(2)-N(2)-H(2B)  | 110.5      |
| H(2A)-N(2)-H(2B) | 108.7      |
| O(1)-C(1)-N(1)   | 125.7(2)   |
| O(1)-C(1)-C(2)   | 119.8(2)   |
| N(1)-C(1)-C(2)   | 114.5(2)   |
| N(2)-C(2)-C(1)   | 109.03(18) |
| N(2)-C(2)-C(3)   | 104.33(18) |
| C(1)-C(2)-C(3)   | 113.52(19) |
| N(2)-C(2)-H(2)   | 109.9      |
| C(1)-C(2)-H(2)   | 109.9      |
| C(3)-C(2)-H(2)   | 109.9      |
| C(2)-C(3)-C(4)   | 105.93(18) |
| C(2)-C(3)-H(3A)  | 110.6      |
| C(4)-C(3)-H(3A)  | 110.6      |
| C(2)-C(3)-H(3B)  | 110.6      |
| C(4)-C(3)-H(3B)  | 110.6      |
| H(3A)-C(3)-H(3B) | 108.7      |
| C(6)-C(4)-C(5)   | 116.5(2)   |
| C(6)-C(4)-C(3)   | 113.73(19) |
| C(5)-C(4)-C(3)   | 102.33(18) |
| C(6)-C(4)-H(4)   | 107.9      |
| C(5)-C(4)-H(4)   | 107.9      |
| C(3)-C(4)-H(4)   | 107.9      |

|                     |            |
|---------------------|------------|
| N(2)-C(5)-C(4)      | 101.97(18) |
| N(2)-C(5)-H(5A)     | 111.4      |
| C(4)-C(5)-H(5A)     | 111.4      |
| N(2)-C(5)-H(5B)     | 111.4      |
| C(4)-C(5)-H(5B)     | 111.4      |
| H(5A)-C(5)-H(5B)    | 109.2      |
| C(7)-C(6)-C(11)     | 117.9(2)   |
| C(7)-C(6)-C(4)      | 119.2(2)   |
| C(11)-C(6)-C(4)     | 122.9(2)   |
| C(8)-C(7)-C(6)      | 121.6(2)   |
| C(8)-C(7)-H(7)      | 119.2      |
| C(6)-C(7)-H(7)      | 119.2      |
| C(7)-C(8)-C(9)      | 118.9(2)   |
| C(7)-C(8)-H(8)      | 120.6      |
| C(9)-C(8)-H(8)      | 120.6      |
| C(10)-C(9)-C(8)     | 121.1(2)   |
| C(10)-C(9)-Cl(1)    | 119.6(2)   |
| C(8)-C(9)-Cl(1)     | 119.2(2)   |
| C(9)-C(10)-C(11)    | 119.2(2)   |
| C(9)-C(10)-H(10)    | 120.4      |
| C(11)-C(10)-H(10)   | 120.4      |
| C(10)-C(11)-C(6)    | 121.2(2)   |
| C(10)-C(11)-H(11)   | 119.4      |
| C(6)-C(11)-H(11)    | 119.4      |
| N(1)-C(12)-C(13)    | 110.1(2)   |
| N(1)-C(12)-C(15)    | 109.5(2)   |
| C(13)-C(12)-C(15)   | 111.1(2)   |
| N(1)-C(12)-C(14)    | 106.0(2)   |
| C(13)-C(12)-C(14)   | 110.1(2)   |
| C(15)-C(12)-C(14)   | 109.9(2)   |
| C(12)-C(13)-H(13A)  | 109.5      |
| C(12)-C(13)-H(13B)  | 109.5      |
| H(13A)-C(13)-H(13B) | 109.5      |
| C(12)-C(13)-H(13C)  | 109.5      |
| H(13A)-C(13)-H(13C) | 109.5      |
| H(13B)-C(13)-H(13C) | 109.5      |
| C(12)-C(14)-H(14A)  | 109.5      |
| C(12)-C(14)-H(14B)  | 109.5      |

|                     |       |
|---------------------|-------|
| H(14A)-C(14)-H(14B) | 109.5 |
| C(12)-C(14)-H(14C)  | 109.5 |
| H(14A)-C(14)-H(14C) | 109.5 |
| H(14B)-C(14)-H(14C) | 109.5 |
| C(12)-C(15)-H(15A)  | 109.5 |
| C(12)-C(15)-H(15B)  | 109.5 |
| H(15A)-C(15)-H(15B) | 109.5 |
| C(12)-C(15)-H(15C)  | 109.5 |
| H(15A)-C(15)-H(15C) | 109.5 |
| H(15B)-C(15)-H(15C) | 109.5 |

---

Symmetry transformations used to generate equivalent atoms:

Table 4. Anisotropic displacement parameters ( $\text{\AA}^2 \times 10^3$ ) for mo\_d8v21545\_0m. The anisotropic displacement factor exponent takes the form:  $-2\pi^2 [ h^2 a^{*2} U^{11} + \dots + 2 h k a^* b^* U^{12} ]$

|       | U <sup>11</sup> | U <sup>22</sup> | U <sup>33</sup> | U <sup>23</sup> | U <sup>13</sup> | U <sup>12</sup> |
|-------|-----------------|-----------------|-----------------|-----------------|-----------------|-----------------|
| Cl(1) | 69(1)           | 44(1)           | 53(1)           | 8(1)            | 5(1)            | 19(1)           |
| O(1)  | 43(1)           | 46(1)           | 34(1)           | 6(1)            | -14(1)          | -7(1)           |
| N(1)  | 38(1)           | 34(1)           | 28(1)           | 3(1)            | -9(1)           | -5(1)           |
| N(2)  | 26(1)           | 36(1)           | 24(1)           | -2(1)           | 1(1)            | 3(1)            |
| C(1)  | 29(1)           | 34(1)           | 28(1)           | -2(1)           | -2(1)           | 2(1)            |
| C(2)  | 25(1)           | 34(1)           | 24(1)           | -1(1)           | -1(1)           | -1(1)           |
| C(3)  | 26(1)           | 31(1)           | 40(1)           | 6(1)            | 3(1)            | 0(1)            |
| C(4)  | 30(1)           | 34(1)           | 22(1)           | -1(1)           | 1(1)            | 1(1)            |
| C(5)  | 26(1)           | 34(1)           | 30(1)           | -1(1)           | 0(1)            | -2(1)           |
| C(6)  | 30(1)           | 32(1)           | 24(1)           | -2(1)           | 0(1)            | -3(1)           |
| C(7)  | 32(1)           | 34(1)           | 35(1)           | -2(1)           | 4(1)            | -2(1)           |
| C(8)  | 39(2)           | 41(2)           | 39(2)           | -7(1)           | 6(1)            | 2(1)            |
| C(9)  | 45(2)           | 32(1)           | 34(1)           | -2(1)           | -4(1)           | 7(1)            |
| C(10) | 50(2)           | 36(2)           | 34(1)           | 3(1)            | 6(1)            | -5(1)           |
| C(11) | 34(2)           | 38(2)           | 36(1)           | -1(1)           | 6(1)            | -2(1)           |
| C(12) | 44(2)           | 34(2)           | 34(1)           | 1(1)            | -3(1)           | -7(1)           |
| C(13) | 46(2)           | 53(2)           | 49(2)           | 3(1)            | 8(1)            | 4(1)            |
| C(14) | 80(2)           | 57(2)           | 58(2)           | 6(2)            | -20(2)          | -35(2)          |
| C(15) | 66(2)           | 37(2)           | 49(2)           | 3(1)            | 11(2)           | 9(1)            |
| Cl(2) | 36(1)           | 54(1)           | 24(1)           | -3(1)           | -1(1)           | 11(1)           |

5. Hydrogen coordinates ( $\times 10^4$ ) and isotropic displacement parameters ( $\text{\AA}^2 \times 10^3$ ) for mo\_d8v21545\_0m.

|        | x    | y    | z    | U(eq) |
|--------|------|------|------|-------|
| H(1)   | 3407 | 1728 | 3224 | 40    |
| H(2A)  | 8890 | 2479 | 4741 | 35    |
| H(2B)  | 9366 | 2419 | 3240 | 35    |
| H(2)   | 5827 | 2310 | 2667 | 34    |
| H(3A)  | 3619 | 2765 | 4617 | 39    |
| H(3B)  | 3751 | 2960 | 3162 | 39    |
| H(4)   | 6545 | 3217 | 5336 | 34    |
| H(5A)  | 8240 | 3216 | 2787 | 36    |
| H(5B)  | 9645 | 3274 | 4124 | 36    |
| H(7)   | 2710 | 3698 | 5248 | 40    |
| H(8)   | 1182 | 4475 | 4853 | 47    |
| H(10)  | 6301 | 4825 | 2660 | 48    |
| H(11)  | 7800 | 4041 | 3040 | 43    |
| H(13A) | 3318 | 1457 | 6467 | 73    |
| H(13B) | 1586 | 1021 | 6256 | 73    |
| H(13C) | 1025 | 1561 | 5725 | 73    |
| H(14A) | 288  | 1216 | 3496 | 99    |
| H(14B) | 836  | 674  | 4023 | 99    |
| H(14C) | 2116 | 891  | 2838 | 99    |
| H(15A) | 5713 | 741  | 3967 | 76    |
| H(15B) | 4550 | 517  | 5186 | 76    |
| H(15C) | 6236 | 964  | 5370 | 76    |

Table 6. Torsion angles [ $^\circ$ ] for mo\_d8v21545\_0m.

|                      |             |
|----------------------|-------------|
| C(12)-N(1)-C(1)-O(1) | 1.5(4)      |
| C(12)-N(1)-C(1)-C(2) | -177.6(2)   |
| C(5)-N(2)-C(2)-C(1)  | -147.34(18) |
| C(5)-N(2)-C(2)-C(3)  | -25.8(2)    |
| O(1)-C(1)-C(2)-N(2)  | 25.2(3)     |
| N(1)-C(1)-C(2)-N(2)  | -155.7(2)   |



|                        |             |
|------------------------|-------------|
| O(1)-C(1)-C(2)-C(3)    | -90.7(3)    |
| N(1)-C(1)-C(2)-C(3)    | 88.5(3)     |
| N(2)-C(2)-C(3)-C(4)    | -0.9(2)     |
| C(1)-C(2)-C(3)-C(4)    | 117.7(2)    |
| C(2)-C(3)-C(4)-C(6)    | 152.64(19)  |
| C(2)-C(3)-C(4)-C(5)    | 26.1(2)     |
| C(2)-N(2)-C(5)-C(4)    | 42.6(2)     |
| C(6)-C(4)-C(5)-N(2)    | -166.27(18) |
| C(3)-C(4)-C(5)-N(2)    | -41.6(2)    |
| C(5)-C(4)-C(6)-C(7)    | 176.8(2)    |
| C(3)-C(4)-C(6)-C(7)    | 58.1(3)     |
| C(5)-C(4)-C(6)-C(11)   | -1.9(3)     |
| C(3)-C(4)-C(6)-C(11)   | -120.6(2)   |
| C(11)-C(6)-C(7)-C(8)   | 2.0(4)      |
| C(4)-C(6)-C(7)-C(8)    | -176.7(2)   |
| C(6)-C(7)-C(8)-C(9)    | -0.2(4)     |
| C(7)-C(8)-C(9)-C(10)   | -2.0(4)     |
| C(7)-C(8)-C(9)-Cl(1)   | 177.81(19)  |
| C(8)-C(9)-C(10)-C(11)  | 2.4(4)      |
| Cl(1)-C(9)-C(10)-C(11) | -177.40(19) |
| C(9)-C(10)-C(11)-C(6)  | -0.6(4)     |
| C(7)-C(6)-C(11)-C(10)  | -1.6(4)     |
| C(4)-C(6)-C(11)-C(10)  | 177.1(2)    |
| C(1)-N(1)-C(12)-C(13)  | 63.4(3)     |
| C(1)-N(1)-C(12)-C(15)  | -59.0(3)    |
| C(1)-N(1)-C(12)-C(14)  | -177.5(3)   |

---

Symmetry transformations used to generate equivalent atoms:

Table 7. Hydrogen bonds for mo\_d8v21545\_0m [Å and °].

| D-H...A                | d(D-H) | d(H...A) | d(D...A)   | <(DHA) |
|------------------------|--------|----------|------------|--------|
| C(15)-H(15C)...O(1)    | 0.97   | 2.48     | 3.084(3)   | 120.1  |
| C(15)-H(15A)...Cl(1)#1 | 0.97   | 2.95     | 3.904(3)   | 168.1  |
| C(13)-H(13A)...O(1)    | 0.97   | 2.61     | 3.183(3)   | 117.7  |
| C(8)-H(8)...Cl(1)#2    | 0.94   | 2.97     | 3.886(3)   | 165.6  |
| C(5)-H(5B)...Cl(2)#3   | 0.98   | 2.91     | 3.428(2)   | 114.1  |
| C(5)-H(5A)...O(1)#4    | 0.98   | 2.55     | 3.449(3)   | 152.7  |
| C(3)-H(3A)...Cl(2)#5   | 0.98   | 2.68     | 3.627(2)   | 162.2  |
| N(2)-H(2B)...Cl(2)#6   | 0.98   | 2.08     | 3.040(2)   | 167.3  |
| N(2)-H(2A)...Cl(2)#3   | 0.98   | 2.47     | 3.2768(19) | 139.8  |
| N(1)-H(1)...Cl(2)      | 0.87   | 2.46     | 3.294(2)   | 159.8  |

Symmetry transformations used to generate equivalent atoms:

#1  $-x+1, y-1/2, -z+1/2$     #2  $-x, -y+1, -z+1$     #3  $x+1, -y+1/2, z+1/2$

#4  $x, -y+1/2, z-1/2$     #5  $x, -y+1/2, z+1/2$     #6  $x+1, y, z$

ORTEP drawing of the X-ray crystallographic structure of **15**

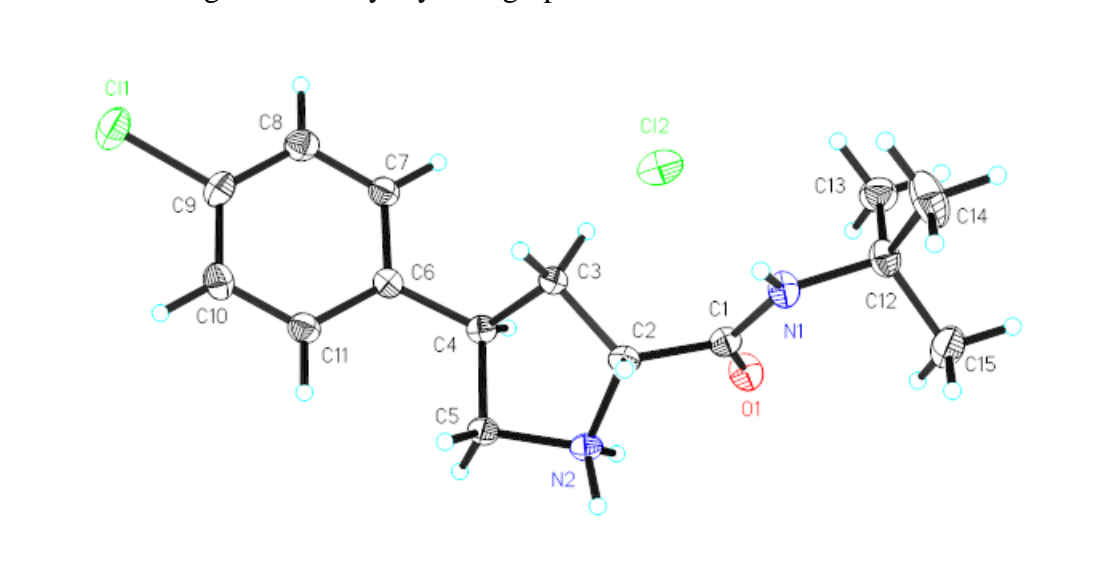

The compound **14** (20 mg) was dissolved in HCl/MeOH (6 M, 5 mL) and stirred at rt for 2h then concentrated to give the deprotected **15** as its hydrochloride. The single crystal was prepared from its solution in methanol/acetonitrile (1:10) by slow evaporation of the solvent.

CCDC 2094460. For detailed crystallographic data, please refer to the Cambridge Crystallographic Data Centre at <http://ccdc.cam.ac.uk>.

Table 1. Crystal data and structure refinement for mo\_d8v21544\_0m.

|                                 |                                                          |                 |
|---------------------------------|----------------------------------------------------------|-----------------|
| Identification code             | mo_d8v21544_0m                                           |                 |
| Empirical formula               | C <sub>12</sub> H <sub>15</sub> Br Cl F N <sub>2</sub> O |                 |
| Formula weight                  | 337.62                                                   |                 |
| Temperature                     | 213(2) K                                                 |                 |
| Wavelength                      | 0.71073 Å                                                |                 |
| Crystal system                  | Monoclinic                                               |                 |
| Space group                     | P 21                                                     |                 |
| Unit cell dimensions            | a = 6.5060(4) Å                                          | α = 90°.        |
|                                 | b = 4.7861(3) Å                                          | β = 96.991(2)°. |
|                                 | c = 21.3358(10) Å                                        | γ = 90°.        |
| Volume                          | 659.42(7) Å <sup>3</sup>                                 |                 |
| Z                               | 2                                                        |                 |
| Density (calculated)            | 1.700 Mg/m <sup>3</sup>                                  |                 |
| Absorption coefficient          | 3.321 mm <sup>-1</sup>                                   |                 |
| F(000)                          | 340                                                      |                 |
| Crystal size                    | 0.170 x 0.140 x 0.100 mm <sup>3</sup>                    |                 |
| Theta range for data collection | 2.886 to 25.995°.                                        |                 |
| Index ranges                    | -8 ≤ h ≤ 8, -5 ≤ k ≤ 5, -26 ≤ l ≤ 25                     |                 |
| Reflections collected           | 6384                                                     |                 |

|                                   |                                             |
|-----------------------------------|---------------------------------------------|
| Independent reflections           | 2446 [R(int) = 0.0301]                      |
| Completeness to theta = 25.242°   | 98.4 %                                      |
| Absorption correction             | Semi-empirical from equivalents             |
| Max. and min. transmission        | 0.7456 and 0.4967                           |
| Refinement method                 | Full-matrix least-squares on F <sup>2</sup> |
| Data / restraints / parameters    | 2446 / 1 / 172                              |
| Goodness-of-fit on F <sup>2</sup> | 0.998                                       |
| Final R indices [I > 2σ(I)]       | R1 = 0.0195, wR2 = 0.0487                   |
| R indices (all data)              | R1 = 0.0205, wR2 = 0.0490                   |
| Absolute structure parameter      | 0.030(6)                                    |
| Extinction coefficient            | 0.014(4)                                    |
| Largest diff. peak and hole       | 0.244 and -0.219 e.Å <sup>-3</sup>          |

Table 2. Atomic coordinates ( $\times 10^4$ ) and equivalent isotropic displacement parameters ( $\text{\AA}^2 \times 10^3$ ) for mo\_d8v21544\_0m.  $U(\text{eq})$  is defined as one third of the trace of the orthogonalized  $U^{\text{ij}}$  tensor.

|       | x        | y        | z       | U(eq) |
|-------|----------|----------|---------|-------|
| Br(1) | 13631(1) | -147(1)  | 9460(1) | 34(1) |
| Cl(1) | 8696(1)  | 2172(1)  | 6530(1) | 27(1) |
| F(1)  | 2956(3)  | 3616(4)  | 5316(1) | 33(1) |
| O(1)  | 4009(3)  | 10159(5) | 7246(1) | 25(1) |
| N(1)  | 6396(4)  | 6742(5)  | 7454(1) | 22(1) |
| N(2)  | 1618(4)  | 7010(5)  | 6391(1) | 19(1) |
| C(1)  | 1112(4)  | 7408(8)  | 5690(1) | 25(1) |
| C(2)  | 3046(5)  | 6529(7)  | 5420(2) | 23(1) |
| C(3)  | 4783(4)  | 7151(7)  | 5933(1) | 22(1) |
| C(4)  | 3871(4)  | 6284(6)  | 6534(1) | 17(1) |
| C(5)  | 4772(4)  | 7902(6)  | 7122(1) | 18(1) |
| C(6)  | 7527(5)  | 8136(7)  | 8000(1) | 30(1) |
| C(7)  | 9008(5)  | 6118(6)  | 8360(1) | 24(1) |
| C(8)  | 10869(5) | 5439(7)  | 8141(1) | 34(1) |
| C(9)  | 12226(5) | 3552(7)  | 8456(1) | 29(1) |
| C(10) | 11738(5) | 2359(7)  | 9004(1) | 24(1) |
| C(11) | 9905(5)  | 2972(7)  | 9237(1) | 28(1) |
| C(12) | 8537(4)  | 4812(9)  | 8910(1) | 29(1) |

Table 3. Bond lengths [ $\text{\AA}$ ] and angles [ $^\circ$ ] for mo\_d8v21544\_0m.

|                 |          |
|-----------------|----------|
| Br(1)-C(10)     | 1.900(3) |
| F(1)-C(2)       | 1.412(3) |
| O(1)-C(5)       | 1.231(4) |
| N(1)-C(5)       | 1.320(4) |
| N(1)-C(6)       | 1.461(4) |
| N(1)-H(1)       | 0.8700   |
| N(2)-C(4)       | 1.501(3) |
| N(2)-C(1)       | 1.503(3) |
| N(2)-H(2B)      | 0.86(3)  |
| N(2)-H(2A)      | 1.02(5)  |
| C(1)-C(2)       | 1.507(4) |
| C(1)-H(1A)      | 0.9800   |
| C(1)-H(1B)      | 0.9800   |
| C(2)-C(3)       | 1.505(4) |
| C(2)-H(2)       | 0.9900   |
| C(3)-C(4)       | 1.534(3) |
| C(3)-H(3A)      | 0.9800   |
| C(3)-H(3B)      | 0.9800   |
| C(4)-C(5)       | 1.529(4) |
| C(4)-H(4)       | 0.9900   |
| C(6)-C(7)       | 1.507(4) |
| C(6)-H(6A)      | 0.9800   |
| C(6)-H(6B)      | 0.9800   |
| C(7)-C(8)       | 1.388(4) |
| C(7)-C(12)      | 1.396(4) |
| C(8)-C(9)       | 1.379(4) |
| C(8)-H(8)       | 0.9400   |
| C(9)-C(10)      | 1.373(4) |
| C(9)-H(9)       | 0.9400   |
| C(10)-C(11)     | 1.378(4) |
| C(11)-C(12)     | 1.379(5) |
| C(11)-H(11)     | 0.9400   |
| C(12)-H(12)     | 0.9400   |
| C(5)-N(1)-C(6)  | 121.9(2) |
| C(5)-N(1)-H(1)  | 119.1    |
| C(6)-N(1)-H(1)  | 119.1    |
| C(4)-N(2)-C(1)  | 108.8(2) |
| C(4)-N(2)-H(2B) | 113(2)   |

|                  |          |
|------------------|----------|
| C(1)-N(2)-H(2B)  | 108(2)   |
| C(4)-N(2)-H(2A)  | 112(3)   |
| C(1)-N(2)-H(2A)  | 108(2)   |
| H(2B)-N(2)-H(2A) | 108(3)   |
| N(2)-C(1)-C(2)   | 104.7(2) |
| N(2)-C(1)-H(1A)  | 110.8    |
| C(2)-C(1)-H(1A)  | 110.8    |
| N(2)-C(1)-H(1B)  | 110.8    |
| C(2)-C(1)-H(1B)  | 110.8    |
| H(1A)-C(1)-H(1B) | 108.9    |
| F(1)-C(2)-C(3)   | 108.8(3) |
| F(1)-C(2)-C(1)   | 108.4(3) |
| C(3)-C(2)-C(1)   | 104.7(2) |
| F(1)-C(2)-H(2)   | 111.5    |
| C(3)-C(2)-H(2)   | 111.5    |
| C(1)-C(2)-H(2)   | 111.5    |
| C(2)-C(3)-C(4)   | 102.9(2) |
| C(2)-C(3)-H(3A)  | 111.2    |
| C(4)-C(3)-H(3A)  | 111.2    |
| C(2)-C(3)-H(3B)  | 111.2    |
| C(4)-C(3)-H(3B)  | 111.2    |
| H(3A)-C(3)-H(3B) | 109.1    |
| N(2)-C(4)-C(5)   | 108.5(2) |
| N(2)-C(4)-C(3)   | 103.5(2) |
| C(5)-C(4)-C(3)   | 113.6(2) |
| N(2)-C(4)-H(4)   | 110.3    |
| C(5)-C(4)-H(4)   | 110.3    |
| C(3)-C(4)-H(4)   | 110.3    |
| O(1)-C(5)-N(1)   | 124.8(3) |
| O(1)-C(5)-C(4)   | 119.8(3) |
| N(1)-C(5)-C(4)   | 115.4(2) |
| N(1)-C(6)-C(7)   | 110.0(2) |
| N(1)-C(6)-H(6A)  | 109.7    |
| C(7)-C(6)-H(6A)  | 109.7    |
| N(1)-C(6)-H(6B)  | 109.7    |
| C(7)-C(6)-H(6B)  | 109.7    |
| H(6A)-C(6)-H(6B) | 108.2    |
| C(8)-C(7)-C(12)  | 117.9(3) |

|                   |          |
|-------------------|----------|
| C(8)-C(7)-C(6)    | 120.5(3) |
| C(12)-C(7)-C(6)   | 121.6(3) |
| C(9)-C(8)-C(7)    | 121.5(3) |
| C(9)-C(8)-H(8)    | 119.2    |
| C(7)-C(8)-H(8)    | 119.2    |
| C(10)-C(9)-C(8)   | 119.1(3) |
| C(10)-C(9)-H(9)   | 120.5    |
| C(8)-C(9)-H(9)    | 120.5    |
| C(9)-C(10)-C(11)  | 121.2(3) |
| C(9)-C(10)-Br(1)  | 119.7(2) |
| C(11)-C(10)-Br(1) | 119.1(2) |
| C(10)-C(11)-C(12) | 119.2(3) |
| C(10)-C(11)-H(11) | 120.4    |
| C(12)-C(11)-H(11) | 120.4    |
| C(11)-C(12)-C(7)  | 121.1(3) |
| C(11)-C(12)-H(12) | 119.4    |
| C(7)-C(12)-H(12)  | 119.4    |

---

Symmetry transformations used to generate equivalent atoms:

Table 4. Anisotropic displacement parameters ( $\text{\AA}^2 \times 10^3$ ) for mo\_d8v21544\_0m. The anisotropic displacement factor exponent takes the form:  $-2\pi^2 [ h^2 a^{*2} U^{11} + \dots + 2 h k a^* b^* U^{12} ]$

|       | $U^{11}$ | $U^{22}$ | $U^{33}$ | $U^{23}$ | $U^{13}$ | $U^{12}$ |
|-------|----------|----------|----------|----------|----------|----------|
| Br(1) | 34(1)    | 32(1)    | 32(1)    | -1(1)    | -8(1)    | 9(1)     |
| Cl(1) | 20(1)    | 20(1)    | 42(1)    | -3(1)    | 7(1)     | 0(1)     |
| F(1)  | 37(1)    | 28(1)    | 32(1)    | -12(1)   | -2(1)    | 2(1)     |
| O(1)  | 27(1)    | 19(1)    | 26(1)    | -4(1)    | -2(1)    | 7(1)     |
| N(1)  | 28(1)    | 18(1)    | 20(1)    | -4(1)    | -5(1)    | 5(1)     |
| N(2)  | 17(1)    | 19(1)    | 20(1)    | -1(1)    | 2(1)     | 0(1)     |
| C(1)  | 22(2)    | 32(2)    | 19(1)    | -1(1)    | -3(1)    | 3(2)     |
| C(2)  | 26(2)    | 23(2)    | 21(1)    | -1(1)    | 3(1)     | -2(1)    |
| C(3)  | 17(1)    | 28(2)    | 22(1)    | -2(1)    | 4(1)     | -1(1)    |
| C(4)  | 15(2)    | 17(1)    | 18(1)    | 1(1)     | -1(1)    | 2(1)     |
| C(5)  | 21(2)    | 18(1)    | 16(1)    | 1(1)     | 5(1)     | -4(1)    |
| C(6)  | 35(2)    | 27(2)    | 25(2)    | -4(1)    | -9(1)    | 4(1)     |
| C(7)  | 29(2)    | 22(1)    | 18(1)    | -3(1)    | -6(1)    | 1(1)     |

|       |       |       |       |       |       |      |
|-------|-------|-------|-------|-------|-------|------|
| C(8)  | 33(2) | 47(3) | 21(1) | 4(1)  | 3(1)  | 0(2) |
| C(9)  | 23(2) | 41(2) | 24(1) | -3(1) | 4(1)  | 2(1) |
| C(10) | 27(2) | 22(2) | 22(1) | -5(1) | -4(1) | 2(1) |
| C(11) | 32(2) | 32(2) | 22(1) | 5(1)  | 6(1)  | 3(1) |
| C(12) | 26(2) | 34(1) | 28(1) | 3(2)  | 5(1)  | 7(2) |

Table

5. Hydrogen coordinates ( $\times 10^4$ ) and isotropic displacement parameters ( $\text{\AA}^2 \times 10^3$ ) for mo\_d8v21544\_0m.

|       | x        | y         | z        | U(eq)  |
|-------|----------|-----------|----------|--------|
| H(1)  | 6803     | 5101      | 7344     | 27     |
| H(1A) | 779      | 9366      | 5589     | 30     |
| H(1B) | -68      | 6241      | 5524     | 30     |
| H(2)  | 3212     | 7562      | 5027     | 28     |
| H(3A) | 5140     | 9141      | 5942     | 27     |
| H(3B) | 6019     | 6053      | 5878     | 27     |
| H(4)  | 4041     | 4249      | 6606     | 20     |
| H(6A) | 6548     | 8844      | 8276     | 36     |
| H(6B) | 8298     | 9728      | 7858     | 36     |
| H(8)  | 11211    | 6285      | 7770     | 40     |
| H(9)  | 13469    | 3089      | 8297     | 35     |
| H(11) | 9590     | 2146      | 9613     | 34     |
| H(12) | 7266     | 5193      | 9060     | 35     |
| H(2B) | 1290(50) | 8530(70)  | 6572(14) | 19(8)  |
| H(2A) | 680(60)  | 5450(110) | 6523(18) | 73(14) |

Table 6. Torsion angles [ $^\circ$ ] for mo\_d8v21544\_0m.

|                     |          |
|---------------------|----------|
| C(4)-N(2)-C(1)-C(2) | 7.2(3)   |
| N(2)-C(1)-C(2)-F(1) | 86.9(3)  |
| N(2)-C(1)-C(2)-C(3) | -29.1(3) |
| F(1)-C(2)-C(3)-C(4) | -76.2(3) |
| C(1)-C(2)-C(3)-C(4) | 39.6(3)  |
| C(1)-N(2)-C(4)-C(5) | 137.8(3) |
| C(1)-N(2)-C(4)-C(3) | 16.8(3)  |
| C(2)-C(3)-C(4)-N(2) | -34.3(3) |



|                         |           |
|-------------------------|-----------|
| C(2)-C(3)-C(4)-C(5)     | -151.8(3) |
| C(6)-N(1)-C(5)-O(1)     | -2.9(4)   |
| C(6)-N(1)-C(5)-C(4)     | 175.2(3)  |
| N(2)-C(4)-C(5)-O(1)     | -28.1(3)  |
| C(3)-C(4)-C(5)-O(1)     | 86.5(3)   |
| N(2)-C(4)-C(5)-N(1)     | 153.7(2)  |
| C(3)-C(4)-C(5)-N(1)     | -91.7(3)  |
| C(5)-N(1)-C(6)-C(7)     | 168.6(2)  |
| N(1)-C(6)-C(7)-C(8)     | 77.6(4)   |
| N(1)-C(6)-C(7)-C(12)    | -100.4(3) |
| C(12)-C(7)-C(8)-C(9)    | -0.4(5)   |
| C(6)-C(7)-C(8)-C(9)     | -178.6(3) |
| C(7)-C(8)-C(9)-C(10)    | -1.2(5)   |
| C(8)-C(9)-C(10)-C(11)   | 1.3(5)    |
| C(8)-C(9)-C(10)-Br(1)   | -177.9(2) |
| C(9)-C(10)-C(11)-C(12)  | 0.2(5)    |
| Br(1)-C(10)-C(11)-C(12) | 179.4(3)  |
| C(10)-C(11)-C(12)-C(7)  | -1.9(5)   |
| C(8)-C(7)-C(12)-C(11)   | 2.0(5)    |
| C(6)-C(7)-C(12)-C(11)   | -179.9(3) |

Symmetry transformations used to generate equivalent atoms:

Table 7. Hydrogen bonds for mo\_d8v21544\_0m [Å and °].

| D-H...A              | d(D-H)  | d(H...A) | d(D...A) | <(DHA) |
|----------------------|---------|----------|----------|--------|
| N(2)-H(2A)...Cl(1)#1 | 1.02(5) | 2.03(5)  | 3.034(3) | 164(3) |
| N(2)-H(2B)...O(1)    | 0.86(3) | 2.28(3)  | 2.708(3) | 111(2) |
| N(2)-H(2B)...Cl(1)#2 | 0.86(3) | 2.42(3)  | 3.153(3) | 143(3) |
| C(4)-H(4)...O(1)#3   | 0.99    | 2.39     | 3.298(4) | 152.3  |
| C(3)-H(3B)...Cl(1)   | 0.98    | 2.80     | 3.605(3) | 140.1  |
| C(3)-H(3A)...Cl(1)#4 | 0.98    | 2.89     | 3.618(3) | 132.3  |
| C(1)-H(1A)...F(1)#4  | 0.98    | 2.59     | 3.338(4) | 133.6  |
| C(1)-H(1A)...Cl(1)#2 | 0.98    | 2.89     | 3.401(3) | 113.7  |
| N(1)-H(1)...Cl(1)    | 0.87    | 2.65     | 3.410(2) | 146.6  |

Symmetry transformations used to generate equivalent atoms:

#1 x-1,y,z    #2 x-1,y+1,z    #3 x,y-1,z    #4 x,y+1,z
